# Supplementary material for: The Effect of Trail Pheromone and Path Confinement on Learning of Complex Routes in the Ant Lasius niger
Source: PLoS One. 2016 Mar 9;11(3):e0149720. doi: 10.1371/journal.pone.0149720 (PMC4784821; doi:10.1371/journal.pone.0149720)
Supplement: S1 Table — (XLSX) [file pone.0149720.s002.xlsx]

## Sheet: README
Complete raw data for Czaczkes et al. (2016) The effect of trail pheromone and path confinement on learning of complex routes in the ant Lasius niger
This file includes several tabs. The first tab (raw data) contains the unmodified dataset, as entered during data collection. The following tabs arrange the data in different ways, to more conveniently graph the data, or for statistical analysis.

## Sheet: raw data
Date	Time	Treatment	mazetreatment	pherotreatment	Colony	Ant	Colour	FeederPos	Trip	Decision	Star	Correct1stBi	Correct2ndBi	Direction	Lays1stBi	Lays2ndBi	Direction	Lays1stBi	Lays2ndBi
2014-05-13	Afternoon	confined - pheromone removed	confined	removed	5	blue541772	blue	L	1	LR		1	1	To Food			To Nest	3	2
2014-05-13	Afternoon	confined - pheromone removed	confined	removed	5	blue541772	blue	L	2	LR		1	1	To Food	0	2	To Nest	3	0
2014-05-13	Afternoon	confined - pheromone removed	confined	removed	5	blue541772	blue	L	3	LR		1	1	To Food			To Nest	3	4
2014-05-13	Afternoon	confined - pheromone removed	confined	removed	5	blue541772	blue	L	4	LR		1	1	To Food			To Nest
2014-05-13	Afternoon	confined - pheromone removed	confined	removed	5	blue541772	blue	L	5	LR		1	1	To Food			To Nest
2014-05-13	Afternoon	confined - pheromone removed	confined	removed	5	blue541772	blue	L	6	LR		1	1	To Food		3	To Nest	3
2014-05-13	Afternoon	confined - pheromone removed	confined	removed	5	blue541772	blue	L	7	RL		0	0	To Food			To Nest
2014-05-13	Afternoon	confined - pheromone removed	confined	removed	5	orange541772	orange	L	1	LR		1	1	To Food			To Nest	5	5
2014-05-13	Afternoon	confined - pheromone removed	confined	removed	5	orange541772	orange	L	2	LR		1	1	To Food	0	4	To Nest
2014-05-13	Afternoon	confined - pheromone removed	confined	removed	5	orange541772	orange	L	3	LR		1	1	To Food		0	To Nest
2014-05-13	Afternoon	confined - pheromone removed	confined	removed	5	orange541772	orange	L	4	LR		1	1	To Food	3	2	To Nest	3	3
2014-05-13	Afternoon	confined - pheromone removed	confined	removed	5	orange541772	orange	L	5	LR		1	1	To Food			To Nest	4	5
2014-05-13	Afternoon	confined - pheromone removed	confined	removed	5	orange541772	orange	L	6	LR		1	1	To Food			To Nest
2014-05-13	Afternoon	confined - pheromone removed	confined	removed	5	orange541772	orange	L	7	RR		0	1	To Food		2	To Nest	2	5
2014-05-13	Afternoon	confined - pheromone removed	confined	removed	5	green541772	green	L	1	LR		1	1	To Food	2	0	To Nest
2014-05-13	Afternoon	confined - pheromone removed	confined	removed	5	green541772	green	L	2	LR		1	1	To Food		2	To Nest
2014-05-13	Afternoon	confined - pheromone removed	confined	removed	5	green541772	green	L	3	LR		1	1	To Food	3		To Nest	0	3
2014-05-13	Afternoon	confined - pheromone removed	confined	removed	5	green541772	green	L	4	LR		1	1	To Food			To Nest
2014-05-13	Afternoon	confined - pheromone removed	confined	removed	5	green541772	green	L	5	LR		1	1	To Food	1	2	To Nest	2	3
2014-05-13	Afternoon	confined - pheromone removed	confined	removed	5	green541772	green	L	6	LR		1	1	To Food		2	To Nest
2014-05-13	Afternoon	confined - pheromone removed	confined	removed	5	green541772	green	L	7	RR		0	1	To Food	0	2	To Nest	0
2014-05-13	Afternoon	confined - pheromone removed	confined	removed	5	red541772	red	L	1	LR		1	1	To Food	2	2	To Nest
2014-05-13	Afternoon	confined - pheromone removed	confined	removed	5	red541772	red	L	2	LR		1	1	To Food			To Nest	5	4
2014-05-13	Afternoon	confined - pheromone removed	confined	removed	5	red541772	red	L	3	LR		1	1	To Food	4	5	To Nest	0	6
2014-05-13	Afternoon	confined - pheromone removed	confined	removed	5	red541772	red	L	4	LR		1	1	To Food			To Nest	4	4
2014-05-13	Afternoon	confined - pheromone removed	confined	removed	5	red541772	red	L	5	LR		1	1	To Food			To Nest
2014-05-13	Afternoon	confined - pheromone removed	confined	removed	5	red541772	red	L	6	LR		1	1	To Food			To Nest	8	4
2014-05-13	Afternoon	confined - pheromone removed	confined	removed	5	red541772	red	L	7	LR		1	1	To Food		3	To Nest	1
2014-05-13	Afternoon	confined - pheromone removed	confined	removed	5	yellow541772	yellow	L	1	LR		1	1	To Food			To Nest	5	5
2014-05-13	Afternoon	confined - pheromone removed	confined	removed	5	yellow541772	yellow	L	2	LR		1	1	To Food	0	4	To Nest
2014-05-13	Afternoon	confined - pheromone removed	confined	removed	5	yellow541772	yellow	L	3	LR		1	1	To Food		0	To Nest
2014-05-13	Afternoon	confined - pheromone removed	confined	removed	5	yellow541772	yellow	L	4	LR		1	1	To Food	3	2	To Nest	3	3
2014-05-13	Afternoon	confined - pheromone removed	confined	removed	5	yellow541772	yellow	L	5	LR		1	1	To Food			To Nest	4	5
2014-05-13	Afternoon	confined - pheromone removed	confined	removed	5	yellow541772	yellow	L	6	LR		1	1	To Food			To Nest
2014-05-13	Afternoon	confined - pheromone removed	confined	removed	5	yellow541772	yellow	L	7	LL		1	0	To Food		2	To Nest	2	5
2014-05-13	Afternoon	confined - pheromone removed	confined	removed	888	blue88841772	blue	L	1	LR		1	1	To Food	0		To Nest
2014-05-13	Afternoon	confined - pheromone removed	confined	removed	888	blue88841772	blue	L	2	LR		1	1	To Food		0	To Nest	2	8
2014-05-13	Afternoon	confined - pheromone removed	confined	removed	888	blue88841772	blue	L	3	LR		1	1	To Food	3	4	To Nest	0
2014-05-13	Afternoon	confined - pheromone removed	confined	removed	888	blue88841772	blue	L	4	LR		1	1	To Food		2	To Nest	4
2014-05-13	Afternoon	confined - pheromone removed	confined	removed	888	blue88841772	blue	L	5	LR		1	1	To Food	4	3	To Nest	4	3
2014-05-13	Afternoon	confined - pheromone removed	confined	removed	888	blue88841772	blue	L	6	LR		1	1	To Food			To Nest	0	2
2014-05-13	Afternoon	confined - pheromone removed	confined	removed	888	blue88841772	blue	L	7	LR		1	1	To Food			To Nest
2014-05-13	Afternoon	confined - pheromone removed	confined	removed	888	orange88841772	orange	L	1	LR		1	1	To Food	0	0	To Nest		4
2014-05-13	Afternoon	confined - pheromone removed	confined	removed	888	orange88841772	orange	L	2	LR		1	1	To Food	2	2	To Nest	0	6
2014-05-13	Afternoon	confined - pheromone removed	confined	removed	888	orange88841772	orange	L	3	LR		1	1	To Food	2		To Nest		2
2014-05-13	Afternoon	confined - pheromone removed	confined	removed	888	orange88841772	orange	L	4	LR		1	1	To Food			To Nest
2014-05-13	Afternoon	confined - pheromone removed	confined	removed	888	orange88841772	orange	L	5	LR		1	1	To Food		2	To Nest	4	3
2014-05-13	Afternoon	confined - pheromone removed	confined	removed	888	orange88841772	orange	L	6	LR		1	1	To Food			To Nest		0
2014-05-13	Afternoon	confined - pheromone removed	confined	removed	888	orange88841772	orange	L	7	LL		1	0	To Food	0	0	To Nest	3	6
2014-05-13	Afternoon	confined - pheromone removed	confined	removed	888	green88841772	green	L	1	LR		1	1	To Food		0	To Nest
2014-05-13	Afternoon	confined - pheromone removed	confined	removed	888	green88841772	green	L	2	LR		1	1	To Food			To Nest
2014-05-13	Afternoon	confined - pheromone removed	confined	removed	888	green88841772	green	L	3	LR		1	1	To Food			To Nest
2014-05-13	Afternoon	confined - pheromone removed	confined	removed	888	green88841772	green	L	4	LR		1	1	To Food			To Nest
2014-05-13	Afternoon	confined - pheromone removed	confined	removed	888	green88841772	green	L	5	LR		1	1	To Food			To Nest
2014-05-13	Afternoon	confined - pheromone removed	confined	removed	888	green88841772	green	L	6	LR		1	1	To Food	4	5	To Nest	5
2014-05-13	Afternoon	confined - pheromone removed	confined	removed	888	green88841772	green	L	7	LR		1	1	To Food			To Nest
2014-05-13	Afternoon	confined - pheromone removed	confined	removed	888	red88841772	red	L	1	LR		1	1	To Food	0	0	To Nest	0	0
2014-05-13	Afternoon	confined - pheromone removed	confined	removed	888	red88841772	red	L	2	LR		1	1	To Food	3	0	To Nest		6
2014-05-13	Afternoon	confined - pheromone removed	confined	removed	888	red88841772	red	L	3	LR		1	1	To Food			To Nest	0	2
2014-05-13	Afternoon	confined - pheromone removed	confined	removed	888	red88841772	red	L	4	LR		1	1	To Food	4	2	To Nest
2014-05-13	Afternoon	confined - pheromone removed	confined	removed	888	red88841772	red	L	5	LR		1	1	To Food	3	4	To Nest	4	0
2014-05-13	Afternoon	confined - pheromone removed	confined	removed	888	red88841772	red	L	6	LR		1	1	To Food		3	To Nest	5	5
2014-05-13	Afternoon	confined - pheromone removed	confined	removed	888	red88841772	red	L	7	RL		0	0	To Food	3	1	To Nest	4	4
2014-05-13	Afternoon	confined - pheromone removed	confined	removed	888	yellow88841772	yellow	L	1	LR		1	1	To Food			To Nest	2	4
2014-05-13	Afternoon	confined - pheromone removed	confined	removed	888	yellow88841772	yellow	L	2	LR		1	1	To Food		4	To Nest
2014-05-13	Afternoon	confined - pheromone removed	confined	removed	888	yellow88841772	yellow	L	3	LR		1	1	To Food	2	0	To Nest	6	6
2014-05-13	Afternoon	confined - pheromone removed	confined	removed	888	yellow88841772	yellow	L	4	LR		1	1	To Food			To Nest	2	3
2014-05-13	Afternoon	confined - pheromone removed	confined	removed	888	yellow88841772	yellow	L	5	LR		1	1	To Food	3		To Nest
2014-05-13	Afternoon	confined - pheromone removed	confined	removed	888	yellow88841772	yellow	L	6	LR		1	1	To Food			To Nest	2
2014-05-13	Afternoon	confined - pheromone removed	confined	removed	888	yellow88841772	yellow	L	7	LR		1	1	To Food			To Nest
2014-05-14	Morning	confined - pheromone removed	confined	removed	6	blue641773	blue	L	1	LR		1	1	To Food			To Nest
2014-05-14	Morning	confined - pheromone removed	confined	removed	6	blue641773	blue	L	2					To Food			To Nest
2014-05-14	Morning	confined - pheromone removed	confined	removed	6	blue641773	blue	L	3					To Food			To Nest
2014-05-14	Morning	confined - pheromone removed	confined	removed	6	blue641773	blue	L	4					To Food			To Nest
2014-05-14	Morning	confined - pheromone removed	confined	removed	6	blue641773	blue	L	5					To Food			To Nest
2014-05-14	Morning	confined - pheromone removed	confined	removed	6	blue641773	blue	L	6					To Food			To Nest
2014-05-14	Morning	confined - pheromone removed	confined	removed	6	blue641773	blue	L	7					To Food			To Nest
2014-05-14	Morning	confined - pheromone removed	confined	removed	6	orange641773	orange	L	1	LR		1	1	To Food	0	0	To Nest	4	5
2014-05-14	Morning	confined - pheromone removed	confined	removed	6	orange641773	orange	L	2	LR		1	1	To Food	1	1	To Nest	4
2014-05-14	Morning	confined - pheromone removed	confined	removed	6	orange641773	orange	L	3	LR		1	1	To Food	0	1	To Nest	0	0
2014-05-14	Morning	confined - pheromone removed	confined	removed	6	orange641773	orange	L	4	LR		1	1	To Food	0	1	To Nest	6	1
2014-05-14	Morning	confined - pheromone removed	confined	removed	6	orange641773	orange	L	5	LR		1	1	To Food	0	3	To Nest	5	5
2014-05-14	Morning	confined - pheromone removed	confined	removed	6	orange641773	orange	L	6	LR		1	1	To Food		1	To Nest		2
2014-05-14	Morning	confined - pheromone removed	confined	removed	6	orange641773	orange	L	7	RL		0	0	To Food			To Nest
2014-05-14	Morning	confined - pheromone removed	confined	removed	6	green641773	green	L	1	LR		1	1	To Food	0	0	To Nest	0	0
2014-05-14	Morning	confined - pheromone removed	confined	removed	6	green641773	green	L	2	LR		1	1	To Food			To Nest	0	0
2014-05-14	Morning	confined - pheromone removed	confined	removed	6	green641773	green	L	3	LR		1	1	To Food			To Nest	0	0
2014-05-14	Morning	confined - pheromone removed	confined	removed	6	green641773	green	L	4	LR		1	1	To Food	0	0	To Nest	0	0
2014-05-14	Morning	confined - pheromone removed	confined	removed	6	green641773	green	L	5	LR		1	1	To Food	0	1	To Nest	0	0
2014-05-14	Morning	confined - pheromone removed	confined	removed	6	green641773	green	L	6	LR		1	1	To Food	0	1	To Nest	1	0
2014-05-14	Morning	confined - pheromone removed	confined	removed	6	green641773	green	L	7	RL		0	0	To Food	0	0	To Nest	0	0
2014-05-14	Morning	confined - pheromone removed	confined	removed	6	red641773	red	L	1	LR		1	1	To Food	0	0	To Nest	0	0
2014-05-14	Morning	confined - pheromone removed	confined	removed	6	red641773	red	L	2	LR		1	1	To Food			To Nest
2014-05-14	Morning	confined - pheromone removed	confined	removed	6	red641773	red	L	3	LR		1	1	To Food			To Nest		10
2014-05-14	Morning	confined - pheromone removed	confined	removed	6	red641773	red	L	4	LR		1	1	To Food	0	0	To Nest
2014-05-14	Morning	confined - pheromone removed	confined	removed	6	red641773	red	L	5	LR		1	1	To Food	3	0	To Nest	5	6
2014-05-14	Morning	confined - pheromone removed	confined	removed	6	red641773	red	L	6	LR		1	1	To Food			To Nest	7	6
2014-05-14	Morning	confined - pheromone removed	confined	removed	6	red641773	red	L	7	RL		0	0	To Food	0	1	To Nest
2014-05-14	Morning	confined - pheromone removed	confined	removed	6	yellow641773	yellow	L	1	LR		1	1	To Food	0	0	To Nest
2014-05-14	Morning	confined - pheromone removed	confined	removed	6	yellow641773	yellow	L	2	LR		1	1	To Food	0	0	To Nest	0	0
2014-05-14	Morning	confined - pheromone removed	confined	removed	6	yellow641773	yellow	L	3	LR		1	1	To Food	0		To Nest
2014-05-14	Morning	confined - pheromone removed	confined	removed	6	yellow641773	yellow	L	4	LR		1	1	To Food		4	To Nest	0
2014-05-14	Morning	confined - pheromone removed	confined	removed	6	yellow641773	yellow	L	5	LR		1	1	To Food			To Nest	4	0
2014-05-14	Morning	confined - pheromone removed	confined	removed	6	yellow641773	yellow	L	6	LR		1	1	To Food	1	1	To Nest
2014-05-14	Morning	confined - pheromone removed	confined	removed	6	yellow641773	yellow	L	7	RR		0	1	To Food			To Nest	1	1
2014-05-14	Afternoon	confined - pheromone removed	confined	removed	3	blue341773	blue	L	1					To Food			To Nest
2014-05-14	Afternoon	confined - pheromone removed	confined	removed	3	blue341773	blue	L	2					To Food			To Nest
2014-05-14	Afternoon	confined - pheromone removed	confined	removed	3	blue341773	blue	L	3					To Food			To Nest
2014-05-14	Afternoon	confined - pheromone removed	confined	removed	3	blue341773	blue	L	4					To Food			To Nest
2014-05-14	Afternoon	confined - pheromone removed	confined	removed	3	blue341773	blue	L	5					To Food			To Nest
2014-05-14	Afternoon	confined - pheromone removed	confined	removed	3	blue341773	blue	L	6					To Food			To Nest
2014-05-14	Afternoon	confined - pheromone removed	confined	removed	3	blue341773	blue	L	7					To Food			To Nest
2014-05-14	Afternoon	confined - pheromone removed	confined	removed	3	orange341773	orange	L	1	LR		1	1	To Food		1	To Nest		0
2014-05-14	Afternoon	confined - pheromone removed	confined	removed	3	orange341773	orange	L	2	LR		1	1	To Food	5	4	To Nest	4	9
2014-05-14	Afternoon	confined - pheromone removed	confined	removed	3	orange341773	orange	L	3	LR		1	1	To Food			To Nest	5	7
2014-05-14	Afternoon	confined - pheromone removed	confined	removed	3	orange341773	orange	L	4	LR		1	1	To Food	4		To Nest	2	4
2014-05-14	Afternoon	confined - pheromone removed	confined	removed	3	orange341773	orange	L	5	LR		1	1	To Food			To Nest	6	7
2014-05-14	Afternoon	confined - pheromone removed	confined	removed	3	orange341773	orange	L	6	LR		1	1	To Food		7	To Nest	6	8
2014-05-14	Afternoon	confined - pheromone removed	confined	removed	3	orange341773	orange	L	7	LR		1	1	To Food			To Nest	4	3
2014-05-14	Afternoon	confined - pheromone removed	confined	removed	3	green341773	green	L	1	LR		1	1	To Food	3	2	To Nest		1
2014-05-14	Afternoon	confined - pheromone removed	confined	removed	3	green341773	green	L	2	LR		1	1	To Food	2	1	To Nest	4	4
2014-05-14	Afternoon	confined - pheromone removed	confined	removed	3	green341773	green	L	3	LR		1	1	To Food			To Nest	5	4
2014-05-14	Afternoon	confined - pheromone removed	confined	removed	3	green341773	green	L	4	LR		1	1	To Food	4	4	To Nest
2014-05-14	Afternoon	confined - pheromone removed	confined	removed	3	green341773	green	L	5	LR		1	1	To Food	3	5	To Nest	4	3
2014-05-14	Afternoon	confined - pheromone removed	confined	removed	3	green341773	green	L	6	LR		1	1	To Food	3	2	To Nest
2014-05-14	Afternoon	confined - pheromone removed	confined	removed	3	green341773	green	L	7	RL		0	1	To Food	0	3	To Nest	2	1
2014-05-14	Afternoon	confined - pheromone removed	confined	removed	3	red341773	red	L	1	LR		1	1	To Food		0	To Nest		0
2014-05-14	Afternoon	confined - pheromone removed	confined	removed	3	red341773	red	L	2	LR		1	1	To Food	4	4	To Nest	4
2014-05-14	Afternoon	confined - pheromone removed	confined	removed	3	red341773	red	L	3	LR		1	1	To Food	3	4	To Nest	6	6
2014-05-14	Afternoon	confined - pheromone removed	confined	removed	3	red341773	red	L	4	LR		1	1	To Food	4	4	To Nest	2	4
2014-05-14	Afternoon	confined - pheromone removed	confined	removed	3	red341773	red	L	5	LR		1	1	To Food			To Nest	7	4
2014-05-14	Afternoon	confined - pheromone removed	confined	removed	3	red341773	red	L	6	LR		1	1	To Food	4	7	To Nest
2014-05-14	Afternoon	confined - pheromone removed	confined	removed	3	red341773	red	L	7	RL		0	1	To Food			To Nest	3	1
2014-05-14	Afternoon	confined - pheromone removed	confined	removed	3	yellow341773	yellow	L	1					To Food			To Nest
2014-05-14	Afternoon	confined - pheromone removed	confined	removed	3	yellow341773	yellow	L	2					To Food			To Nest
2014-05-14	Afternoon	confined - pheromone removed	confined	removed	3	yellow341773	yellow	L	3					To Food			To Nest
2014-05-14	Afternoon	confined - pheromone removed	confined	removed	3	yellow341773	yellow	L	4					To Food			To Nest
2014-05-14	Afternoon	confined - pheromone removed	confined	removed	3	yellow341773	yellow	L	5					To Food			To Nest
2014-05-14	Afternoon	confined - pheromone removed	confined	removed	3	yellow341773	yellow	L	6					To Food			To Nest
2014-05-14	Afternoon	confined - pheromone removed	confined	removed	3	yellow341773	yellow	L	7					To Food			To Nest
2014-05-15	Morning	confined - pheromone removed	confined	removed	12	blue1241774	blue	L	1	LR		1	1	To Food			To Nest
2014-05-15	Morning	confined - pheromone removed	confined	removed	12	blue1241774	blue	L	2	LR		1	1	To Food			To Nest
2014-05-15	Morning	confined - pheromone removed	confined	removed	12	blue1241774	blue	L	3	LR		1	1	To Food			To Nest
2014-05-15	Morning	confined - pheromone removed	confined	removed	12	blue1241774	blue	L	4	LR		1	1	To Food			To Nest
2014-05-15	Morning	confined - pheromone removed	confined	removed	12	blue1241774	blue	L	5	LR		1	1	To Food			To Nest
2014-05-15	Morning	confined - pheromone removed	confined	removed	12	blue1241774	blue	L	6	LR		1	1	To Food			To Nest
2014-05-15	Morning	confined - pheromone removed	confined	removed	12	blue1241774	blue	L	7	RL		0	0	To Food			To Nest
2014-05-15	Morning	confined - pheromone removed	confined	removed	12	orange1241774	orange	L	1	LR		1	1	To Food			To Nest
2014-05-15	Morning	confined - pheromone removed	confined	removed	12	orange1241774	orange	L	2	LR		1	1	To Food	2	4	To Nest
2014-05-15	Morning	confined - pheromone removed	confined	removed	12	orange1241774	orange	L	3	LR		1	1	To Food			To Nest	5	3
2014-05-15	Morning	confined - pheromone removed	confined	removed	12	orange1241774	orange	L	4	LR		1	1	To Food	3	2	To Nest	4	6
2014-05-15	Morning	confined - pheromone removed	confined	removed	12	orange1241774	orange	L	5	LR		1	1	To Food	3	1	To Nest		5
2014-05-15	Morning	confined - pheromone removed	confined	removed	12	orange1241774	orange	L	6	LR		1	1	To Food	0	0	To Nest	5	5
2014-05-15	Morning	confined - pheromone removed	confined	removed	12	orange1241774	orange	L	7	RL		0	0	To Food	1		To Nest	4	4
2014-05-15	Morning	confined - pheromone removed	confined	removed	12	green1241774	green	L	1	LR		1	1	To Food	0	0	To Nest	0	0
2014-05-15	Morning	confined - pheromone removed	confined	removed	12	green1241774	green	L	2	LR		1	1	To Food	2	4	To Nest	2	4
2014-05-15	Morning	confined - pheromone removed	confined	removed	12	green1241774	green	L	3	LR		1	1	To Food		6	To Nest		6
2014-05-15	Morning	confined - pheromone removed	confined	removed	12	green1241774	green	L	4	LR		1	1	To Food			To Nest
2014-05-15	Morning	confined - pheromone removed	confined	removed	12	green1241774	green	L	5	LR		1	1	To Food	4	5	To Nest	4	5
2014-05-15	Morning	confined - pheromone removed	confined	removed	12	green1241774	green	L	6	LR		1	1	To Food	2		To Nest	2
2014-05-15	Morning	confined - pheromone removed	confined	removed	12	green1241774	green	L	7	RR		0	1	To Food	3	0	To Nest	3	0
2014-05-15	Morning	confined - pheromone removed	confined	removed	12	red1241774	red	L	1	LR		1	1	To Food	0	0	To Nest	0	0
2014-05-15	Morning	confined - pheromone removed	confined	removed	12	red1241774	red	L	2	LR		1	1	To Food	0	0	To Nest
2014-05-15	Morning	confined - pheromone removed	confined	removed	12	red1241774	red	L	3	LR		1	1	To Food	0	0	To Nest
2014-05-15	Morning	confined - pheromone removed	confined	removed	12	red1241774	red	L	4	LR		1	1	To Food	0	0	To Nest		2
2014-05-15	Morning	confined - pheromone removed	confined	removed	12	red1241774	red	L	5	LR		1	1	To Food			To Nest	1
2014-05-15	Morning	confined - pheromone removed	confined	removed	12	red1241774	red	L	6	LR		1	1	To Food	2		To Nest	0
2014-05-15	Morning	confined - pheromone removed	confined	removed	12	red1241774	red	L	7	RR		0	1	To Food	0	0	To Nest	3	3
2014-05-15	Morning	confined - pheromone removed	confined	removed	12	yellow1241774	yellow	L	1	LR		1	1	To Food	0	0	To Nest	0	0
2014-05-15	Morning	confined - pheromone removed	confined	removed	12	yellow1241774	yellow	L	2	LR		1	1	To Food	2	0	To Nest	6	6
2014-05-15	Morning	confined - pheromone removed	confined	removed	12	yellow1241774	yellow	L	3	LR		1	1	To Food		0	To Nest
2014-05-15	Morning	confined - pheromone removed	confined	removed	12	yellow1241774	yellow	L	4	LR		1	1	To Food	0	0	To Nest	0	1
2014-05-15	Morning	confined - pheromone removed	confined	removed	12	yellow1241774	yellow	L	5	LR		1	1	To Food	3	2	To Nest	5	4
2014-05-15	Morning	confined - pheromone removed	confined	removed	12	yellow1241774	yellow	L	6	LR		1	1	To Food	2		To Nest	3
2014-05-15	Morning	confined - pheromone removed	confined	removed	12	yellow1241774	yellow	L	7	RR		0	1	To Food			To Nest	0	0
2014-05-15	Afternoon	confined - pheromone removed	confined	removed	11	blue1141774	blue	R	1	RL		1	1	To Food		0	To Nest
2014-05-15	Afternoon	confined - pheromone removed	confined	removed	11	blue1141774	blue	R	2	RL		1	1	To Food			To Nest
2014-05-15	Afternoon	confined - pheromone removed	confined	removed	11	blue1141774	blue	R	3	RL		1	1	To Food	3	0	To Nest	5	6
2014-05-15	Afternoon	confined - pheromone removed	confined	removed	11	blue1141774	blue	R	4	RL		1	1	To Food	3	0	To Nest	3	6
2014-05-15	Afternoon	confined - pheromone removed	confined	removed	11	blue1141774	blue	R	5	RL		1	1	To Food	2		To Nest
2014-05-15	Afternoon	confined - pheromone removed	confined	removed	11	blue1141774	blue	R	6	RL		1	1	To Food			To Nest	7	9
2014-05-15	Afternoon	confined - pheromone removed	confined	removed	11	blue1141774	blue	R	7	LL		0	1	To Food			To Nest	6	0
2014-05-15	Afternoon	confined - pheromone removed	confined	removed	11	orange1141774	orange	R	1	RL		1	1	To Food			To Nest
2014-05-15	Afternoon	confined - pheromone removed	confined	removed	11	orange1141774	orange	R	2	RL		1	1	To Food	0		To Nest
2014-05-15	Afternoon	confined - pheromone removed	confined	removed	11	orange1141774	orange	R	3	RL		1	1	To Food	0	0	To Nest		5
2014-05-15	Afternoon	confined - pheromone removed	confined	removed	11	orange1141774	orange	R	4	RL		1	1	To Food	7	7	To Nest	7
2014-05-15	Afternoon	confined - pheromone removed	confined	removed	11	orange1141774	orange	R	5	RL		1	1	To Food	0	3	To Nest		10
2014-05-15	Afternoon	confined - pheromone removed	confined	removed	11	orange1141774	orange	R	6	RL		1	1	To Food			To Nest	5
2014-05-15	Afternoon	confined - pheromone removed	confined	removed	11	orange1141774	orange	R	7	LR		0	0	To Food		3	To Nest
2014-05-15	Afternoon	confined - pheromone removed	confined	removed	11	green1141774	green	R	1	RL		1	1	To Food			To Nest	0	0
2014-05-15	Afternoon	confined - pheromone removed	confined	removed	11	green1141774	green	R	2	RL		1	1	To Food			To Nest
2014-05-15	Afternoon	confined - pheromone removed	confined	removed	11	green1141774	green	R	3	RL		1	1	To Food			To Nest	2	3
2014-05-15	Afternoon	confined - pheromone removed	confined	removed	11	green1141774	green	R	4	RL		1	1	To Food	4	5	To Nest
2014-05-15	Afternoon	confined - pheromone removed	confined	removed	11	green1141774	green	R	5	RL		1	1	To Food			To Nest	6	7
2014-05-15	Afternoon	confined - pheromone removed	confined	removed	11	green1141774	green	R	6	RL		1	1	To Food			To Nest	12	8
2014-05-15	Afternoon	confined - pheromone removed	confined	removed	11	green1141774	green	R	7	RL		1	1	To Food	4	6	To Nest
2014-05-15	Afternoon	confined - pheromone removed	confined	removed	11	red1141774	red	R	1	RL		1	1	To Food			To Nest		0
2014-05-15	Afternoon	confined - pheromone removed	confined	removed	11	red1141774	red	R	2	RL		1	1	To Food		0	To Nest		8
2014-05-15	Afternoon	confined - pheromone removed	confined	removed	11	red1141774	red	R	3	RL		1	1	To Food			To Nest	5	9
2014-05-15	Afternoon	confined - pheromone removed	confined	removed	11	red1141774	red	R	4	RL		1	1	To Food			To Nest		7
2014-05-15	Afternoon	confined - pheromone removed	confined	removed	11	red1141774	red	R	5	RL		1	1	To Food			To Nest	10	9
2014-05-15	Afternoon	confined - pheromone removed	confined	removed	11	red1141774	red	R	6	RL		1	1	To Food			To Nest		14
2014-05-15	Afternoon	confined - pheromone removed	confined	removed	11	red1141774	red	R	7	RL		1	1	To Food			To Nest	5
2014-05-15	Afternoon	confined - pheromone removed	confined	removed	11	yellow1141774	yellow	R	1	RL		1	1	To Food	0	1	To Nest	4	3
2014-05-15	Afternoon	confined - pheromone removed	confined	removed	11	yellow1141774	yellow	R	2	RL		1	1	To Food			To Nest		4
2014-05-15	Afternoon	confined - pheromone removed	confined	removed	11	yellow1141774	yellow	R	3	RL		1	1	To Food			To Nest
2014-05-15	Afternoon	confined - pheromone removed	confined	removed	11	yellow1141774	yellow	R	4	RL		1	1	To Food	4	3	To Nest	2	7
2014-05-15	Afternoon	confined - pheromone removed	confined	removed	11	yellow1141774	yellow	R	5	RL		1	1	To Food	5		To Nest	3	5
2014-05-15	Afternoon	confined - pheromone removed	confined	removed	11	yellow1141774	yellow	R	6	RL		1	1	To Food			To Nest
2014-05-15	Afternoon	confined - pheromone removed	confined	removed	11	yellow1141774	yellow	R	7	LL		0	1	To Food	4	6	To Nest	4	8
2014-05-20	Morning	confined - pheromone removed	confined	removed	5	blue541779	blue	R	1	RL		1	1	To Food	3		To Nest		3
2014-05-20	Morning	confined - pheromone removed	confined	removed	5	blue541779	blue	R	2	RL		1	1	To Food	4	4	To Nest	3	4
2014-05-20	Morning	confined - pheromone removed	confined	removed	5	blue541779	blue	R	3	RL		1	1	To Food	5	2	To Nest	6	7
2014-05-20	Morning	confined - pheromone removed	confined	removed	5	blue541779	blue	R	4	RL		1	1	To Food			To Nest
2014-05-20	Morning	confined - pheromone removed	confined	removed	5	blue541779	blue	R	5	RL		1	1	To Food	6	3	To Nest	7	7
2014-05-20	Morning	confined - pheromone removed	confined	removed	5	blue541779	blue	R	6	RL		1	1	To Food			To Nest
2014-05-20	Morning	confined - pheromone removed	confined	removed	5	blue541779	blue	R	7	LL		0	1	To Food			To Nest
2014-05-20	Morning	confined - pheromone removed	confined	removed	5	orange541779	orange	R	1	RL		1	1	To Food	7		To Nest
2014-05-20	Morning	confined - pheromone removed	confined	removed	5	orange541779	orange	R	2	RL		1	1	To Food	1		To Nest		4
2014-05-20	Morning	confined - pheromone removed	confined	removed	5	orange541779	orange	R	3	RL		1	1	To Food	0	4	To Nest
2014-05-20	Morning	confined - pheromone removed	confined	removed	5	orange541779	orange	R	4	RL		1	1	To Food		7	To Nest	3	6
2014-05-20	Morning	confined - pheromone removed	confined	removed	5	orange541779	orange	R	5	RL		1	1	To Food			To Nest	5	6
2014-05-20	Morning	confined - pheromone removed	confined	removed	5	orange541779	orange	R	6	RL		1	1	To Food			To Nest	2
2014-05-20	Morning	confined - pheromone removed	confined	removed	5	orange541779	orange	R	7	LL		0	1	To Food			To Nest
2014-05-20	Morning	confined - pheromone removed	confined	removed	5	green541779	green	R	1	RL		1	1	To Food			To Nest	3	3
2014-05-20	Morning	confined - pheromone removed	confined	removed	5	green541779	green	R	2	RL		1	1	To Food			To Nest	2	5
2014-05-20	Morning	confined - pheromone removed	confined	removed	5	green541779	green	R	3	RL		1	1	To Food	0	0	To Nest
2014-05-20	Morning	confined - pheromone removed	confined	removed	5	green541779	green	R	4	RL		1	1	To Food		4	To Nest	9	10
2014-05-20	Morning	confined - pheromone removed	confined	removed	5	green541779	green	R	5	RL		1	1	To Food	5	4	To Nest	3	5
2014-05-20	Morning	confined - pheromone removed	confined	removed	5	green541779	green	R	6	RL		1	1	To Food		2	To Nest
2014-05-20	Morning	confined - pheromone removed	confined	removed	5	green541779	green	R	7	LL		0	1	To Food		3	To Nest	4	4
2014-05-20	Morning	confined - pheromone removed	confined	removed	5	red541779	red	R	1	RL		1	1	To Food			To Nest	0
2014-05-20	Morning	confined - pheromone removed	confined	removed	5	red541779	red	R	2	RL		1	1	To Food		0	To Nest
2014-05-20	Morning	confined - pheromone removed	confined	removed	5	red541779	red	R	3	RL		1	1	To Food			To Nest
2014-05-20	Morning	confined - pheromone removed	confined	removed	5	red541779	red	R	4	RL		1	1	To Food			To Nest	2	0
2014-05-20	Morning	confined - pheromone removed	confined	removed	5	red541779	red	R	5	RL		1	1	To Food			To Nest
2014-05-20	Morning	confined - pheromone removed	confined	removed	5	red541779	red	R	6	RL		1	1	To Food			To Nest
2014-05-20	Morning	confined - pheromone removed	confined	removed	5	red541779	red	R	7	LR		0	0	To Food			To Nest
2014-05-20	Morning	confined - pheromone removed	confined	removed	5	yellow541779	yellow	R	1	RL		1	1	To Food			To Nest	0	1
2014-05-20	Morning	confined - pheromone removed	confined	removed	5	yellow541779	yellow	R	2	RL		1	1	To Food	0		To Nest
2014-05-20	Morning	confined - pheromone removed	confined	removed	5	yellow541779	yellow	R	3	RL		1	1	To Food	1	1	To Nest
2014-05-20	Morning	confined - pheromone removed	confined	removed	5	yellow541779	yellow	R	4					To Food			To Nest	0	0
2014-05-20	Morning	confined - pheromone removed	confined	removed	5	yellow541779	yellow	R	5					To Food			To Nest
2014-05-20	Morning	confined - pheromone removed	confined	removed	5	yellow541779	yellow	R	6					To Food			To Nest
2014-05-20	Morning	confined - pheromone removed	confined	removed	5	yellow541779	yellow	R	7					To Food			To Nest
2014-05-20	Morning	confined - pheromone removed	confined	removed	888	blue88841779	blue	R	1	RL		1	1	To Food			To Nest	0	3
2014-05-20	Morning	confined - pheromone removed	confined	removed	888	blue88841779	blue	R	2	RL		1	1	To Food	0	0	To Nest
2014-05-20	Morning	confined - pheromone removed	confined	removed	888	blue88841779	blue	R	3	RL		1	1	To Food			To Nest	6
2014-05-20	Morning	confined - pheromone removed	confined	removed	888	blue88841779	blue	R	4	RL		1	1	To Food		5	To Nest		5
2014-05-20	Morning	confined - pheromone removed	confined	removed	888	blue88841779	blue	R	5	RL		1	1	To Food		4	To Nest
2014-05-20	Morning	confined - pheromone removed	confined	removed	888	blue88841779	blue	R	6					To Food			To Nest	5	6
2014-05-20	Morning	confined - pheromone removed	confined	removed	888	blue88841779	blue	R	7					To Food			To Nest
2014-05-20	Morning	confined - pheromone removed	confined	removed	888	orange88841779	orange	R	1	RL		1	1	To Food	0	0	To Nest		3
2014-05-20	Morning	confined - pheromone removed	confined	removed	888	orange88841779	orange	R	2	RL		1	1	To Food	3	0	To Nest
2014-05-20	Morning	confined - pheromone removed	confined	removed	888	orange88841779	orange	R	3	RL		1	1	To Food	0	0	To Nest	0	2
2014-05-20	Morning	confined - pheromone removed	confined	removed	888	orange88841779	orange	R	4	RL		1	1	To Food			To Nest	4	4
2014-05-20	Morning	confined - pheromone removed	confined	removed	888	orange88841779	orange	R	5	RL		1	1	To Food	4	3	To Nest	3	6
2014-05-20	Morning	confined - pheromone removed	confined	removed	888	orange88841779	orange	R	6	RL		1	1	To Food			To Nest	4
2014-05-20	Morning	confined - pheromone removed	confined	removed	888	orange88841779	orange	R	7	LL		0	1	To Food			To Nest	0
2014-05-20	Morning	confined - pheromone removed	confined	removed	888	green88841779	green	R	1	RL		1	1	To Food		1	To Nest		3
2014-05-20	Morning	confined - pheromone removed	confined	removed	888	green88841779	green	R	2	RL		1	1	To Food	3	3	To Nest	0
2014-05-20	Morning	confined - pheromone removed	confined	removed	888	green88841779	green	R	3	RL		1	1	To Food		2	To Nest	3
2014-05-20	Morning	confined - pheromone removed	confined	removed	888	green88841779	green	R	4	RL		1	1	To Food	2	4	To Nest	3	3
2014-05-20	Morning	confined - pheromone removed	confined	removed	888	green88841779	green	R	5	RL		1	1	To Food	0	2	To Nest	3
2014-05-20	Morning	confined - pheromone removed	confined	removed	888	green88841779	green	R	6	RL		1	1	To Food		0	To Nest
2014-05-20	Morning	confined - pheromone removed	confined	removed	888	green88841779	green	R	7	LL		0	1	To Food			To Nest
2014-05-20	Morning	confined - pheromone removed	confined	removed	888	red88841779	red	R	1	RL		1	1	To Food	0		To Nest
2014-05-20	Morning	confined - pheromone removed	confined	removed	888	red88841779	red	R	2	RL		1	1	To Food			To Nest
2014-05-20	Morning	confined - pheromone removed	confined	removed	888	red88841779	red	R	3	RL		1	1	To Food			To Nest
2014-05-20	Morning	confined - pheromone removed	confined	removed	888	red88841779	red	R	4	RL		1	1	To Food			To Nest	4	0
2014-05-20	Morning	confined - pheromone removed	confined	removed	888	red88841779	red	R	5	RL		1	1	To Food			To Nest
2014-05-20	Morning	confined - pheromone removed	confined	removed	888	red88841779	red	R	6	RL		1	1	To Food	0		To Nest
2014-05-20	Morning	confined - pheromone removed	confined	removed	888	red88841779	red	R	7	LL		0	1	To Food	0	0	To Nest	0	0
2014-05-20	Morning	confined - pheromone removed	confined	removed	888	yellow88841779	yellow	R	1	RL		1	1	To Food	3	0	To Nest		0
2014-05-20	Morning	confined - pheromone removed	confined	removed	888	yellow88841779	yellow	R	2	RL		1	1	To Food	0	0	To Nest	4	4
2014-05-20	Morning	confined - pheromone removed	confined	removed	888	yellow88841779	yellow	R	3	RL		1	1	To Food			To Nest		0
2014-05-20	Morning	confined - pheromone removed	confined	removed	888	yellow88841779	yellow	R	4	RL		1	1	To Food	0	0	To Nest	4
2014-05-20	Morning	confined - pheromone removed	confined	removed	888	yellow88841779	yellow	R	5	RL		1	1	To Food			To Nest		3
2014-05-20	Morning	confined - pheromone removed	confined	removed	888	yellow88841779	yellow	R	6	RL		1	1	To Food	0	0	To Nest	4	3
2014-05-20	Morning	confined - pheromone removed	confined	removed	888	yellow88841779	yellow	R	7	RR		1	0	To Food			To Nest
2014-05-21	Afternoon	confined - pheromone removed	confined	removed	3	blue341780	blue	R	1	RL		1	1	To Food			To Nest	0
2014-05-21	Afternoon	confined - pheromone removed	confined	removed	3	blue341780	blue	R	2	RL		1	1	To Food			To Nest	2	5
2014-05-21	Afternoon	confined - pheromone removed	confined	removed	3	blue341780	blue	R	3	RL		1	1	To Food			To Nest	6
2014-05-21	Afternoon	confined - pheromone removed	confined	removed	3	blue341780	blue	R	4	RL		1	1	To Food	3		To Nest	6	4
2014-05-21	Afternoon	confined - pheromone removed	confined	removed	3	blue341780	blue	R	5	RL		1	1	To Food			To Nest	4
2014-05-21	Afternoon	confined - pheromone removed	confined	removed	3	blue341780	blue	R	6	RL		1	1	To Food		0	To Nest	5
2014-05-21	Afternoon	confined - pheromone removed	confined	removed	3	blue341780	blue	R	7	LR		0	0	To Food	0	0	To Nest	4
2014-05-21	Afternoon	confined - pheromone removed	confined	removed	3	orange341780	orange	R	1	RL		1	1	To Food			To Nest
2014-05-21	Afternoon	confined - pheromone removed	confined	removed	3	orange341780	orange	R	2	RL		1	1	To Food	0	0	To Nest
2014-05-21	Afternoon	confined - pheromone removed	confined	removed	3	orange341780	orange	R	3	RL		1	1	To Food		0	To Nest	2
2014-05-21	Afternoon	confined - pheromone removed	confined	removed	3	orange341780	orange	R	4	RL		1	1	To Food			To Nest
2014-05-21	Afternoon	confined - pheromone removed	confined	removed	3	orange341780	orange	R	5	RL		1	1	To Food			To Nest	1	2
2014-05-21	Afternoon	confined - pheromone removed	confined	removed	3	orange341780	orange	R	6	RL		1	1	To Food			To Nest
2014-05-21	Afternoon	confined - pheromone removed	confined	removed	3	orange341780	orange	R	7	LL		0	1	To Food	0	1	To Nest
2014-05-21	Afternoon	confined - pheromone removed	confined	removed	3	green341780	green	R	1	RL		1	1	To Food	2	0	To Nest	3	5
2014-05-21	Afternoon	confined - pheromone removed	confined	removed	3	green341780	green	R	2	RL		1	1	To Food	5	1	To Nest
2014-05-21	Afternoon	confined - pheromone removed	confined	removed	3	green341780	green	R	3	RL		1	1	To Food	4	2	To Nest	5
2014-05-21	Afternoon	confined - pheromone removed	confined	removed	3	green341780	green	R	4	RL		1	1	To Food	0		To Nest
2014-05-21	Afternoon	confined - pheromone removed	confined	removed	3	green341780	green	R	5	RL		1	1	To Food			To Nest	0	0
2014-05-21	Afternoon	confined - pheromone removed	confined	removed	3	green341780	green	R	6	RL		1	1	To Food			To Nest	2	5
2014-05-21	Afternoon	confined - pheromone removed	confined	removed	3	green341780	green	R	7	LL		0	1	To Food	0	0	To Nest	3
2014-05-21	Afternoon	confined - pheromone removed	confined	removed	3	red341780	red	R	1	RL		1	1	To Food		2	To Nest	4	3
2014-05-21	Afternoon	confined - pheromone removed	confined	removed	3	red341780	red	R	2	RL		1	1	To Food			To Nest	6	5
2014-05-21	Afternoon	confined - pheromone removed	confined	removed	3	red341780	red	R	3	RL		1	1	To Food			To Nest	6	6
2014-05-21	Afternoon	confined - pheromone removed	confined	removed	3	red341780	red	R	4	RL		1	1	To Food	5	4	To Nest	4
2014-05-21	Afternoon	confined - pheromone removed	confined	removed	3	red341780	red	R	5	RL		1	1	To Food			To Nest
2014-05-21	Afternoon	confined - pheromone removed	confined	removed	3	red341780	red	R	6	RL		1	1	To Food			To Nest
2014-05-21	Afternoon	confined - pheromone removed	confined	removed	3	red341780	red	R	7	RL		1	1	To Food	0	0	To Nest
2014-05-21	Afternoon	confined - pheromone removed	confined	removed	3	yellow341780	yellow	R	1	RL		1	1	To Food	0	0	To Nest	0	0
2014-05-21	Afternoon	confined - pheromone removed	confined	removed	3	yellow341780	yellow	R	2	RL		1	1	To Food	2	0	To Nest	5	2
2014-05-21	Afternoon	confined - pheromone removed	confined	removed	3	yellow341780	yellow	R	3	RL		1	1	To Food	2	0	To Nest	5	2
2014-05-21	Afternoon	confined - pheromone removed	confined	removed	3	yellow341780	yellow	R	4	RL		1	1	To Food			To Nest	6	6
2014-05-21	Afternoon	confined - pheromone removed	confined	removed	3	yellow341780	yellow	R	5	RL		1	1	To Food			To Nest	6
2014-05-21	Afternoon	confined - pheromone removed	confined	removed	3	yellow341780	yellow	R	6					To Food			To Nest	6	6
2014-05-21	Afternoon	confined - pheromone removed	confined	removed	3	yellow341780	yellow	R	7					To Food			To Nest
2014-05-21	Afternoon	confined - pheromone removed	confined	removed	RGB8	blueRGB841780	blue	L	1	LR		1	1	To Food			To Nest	0	5
2014-05-21	Afternoon	confined - pheromone removed	confined	removed	RGB8	blueRGB841780	blue	L	2	LR		1	1	To Food			To Nest
2014-05-21	Afternoon	confined - pheromone removed	confined	removed	RGB8	blueRGB841780	blue	L	3	LR		1	1	To Food	3		To Nest	2	2
2014-05-21	Afternoon	confined - pheromone removed	confined	removed	RGB8	blueRGB841780	blue	L	4	LR		1	1	To Food	0	0	To Nest		4
2014-05-21	Afternoon	confined - pheromone removed	confined	removed	RGB8	blueRGB841780	blue	L	5	LR		1	1	To Food			To Nest
2014-05-21	Afternoon	confined - pheromone removed	confined	removed	RGB8	blueRGB841780	blue	L	6	LR		1	1	To Food	3	4	To Nest
2014-05-21	Afternoon	confined - pheromone removed	confined	removed	RGB8	blueRGB841780	blue	L	7	RR		0	1	To Food	0	0	To Nest	1	1
2014-05-21	Afternoon	confined - pheromone removed	confined	removed	RGB8	orangeRGB841780	orange	L	1	LR		1	1	To Food	0	2	To Nest		4
2014-05-21	Afternoon	confined - pheromone removed	confined	removed	RGB8	orangeRGB841780	orange	L	2	LR		1	1	To Food		3	To Nest
2014-05-21	Afternoon	confined - pheromone removed	confined	removed	RGB8	orangeRGB841780	orange	L	3	LR		1	1	To Food	3		To Nest	5	5
2014-05-21	Afternoon	confined - pheromone removed	confined	removed	RGB8	orangeRGB841780	orange	L	4	LR		1	1	To Food			To Nest
2014-05-21	Afternoon	confined - pheromone removed	confined	removed	RGB8	orangeRGB841780	orange	L	5	LR		1	1	To Food		2	To Nest	0	0
2014-05-21	Afternoon	confined - pheromone removed	confined	removed	RGB8	orangeRGB841780	orange	L	6	LR		1	1	To Food	3		To Nest		0
2014-05-21	Afternoon	confined - pheromone removed	confined	removed	RGB8	orangeRGB841780	orange	L	7	RR		1	1	To Food	2	2	To Nest
2014-05-21	Afternoon	confined - pheromone removed	confined	removed	RGB8	greenRGB841780	green	L	1	LR		1	1	To Food	9	8	To Nest
2014-05-21	Afternoon	confined - pheromone removed	confined	removed	RGB8	greenRGB841780	green	L	2	LR		1	1	To Food		1	To Nest	10	5
2014-05-21	Afternoon	confined - pheromone removed	confined	removed	RGB8	greenRGB841780	green	L	3					To Food			To Nest
2014-05-21	Afternoon	confined - pheromone removed	confined	removed	RGB8	greenRGB841780	green	L	4					To Food			To Nest
2014-05-21	Afternoon	confined - pheromone removed	confined	removed	RGB8	greenRGB841780	green	L	5					To Food			To Nest
2014-05-21	Afternoon	confined - pheromone removed	confined	removed	RGB8	greenRGB841780	green	L	6					To Food			To Nest
2014-05-21	Afternoon	confined - pheromone removed	confined	removed	RGB8	greenRGB841780	green	L	7					To Food			To Nest
2014-05-21	Afternoon	confined - pheromone removed	confined	removed	RGB8	redRGB841780	red	L	1	LR		1	1	To Food			To Nest	0
2014-05-21	Afternoon	confined - pheromone removed	confined	removed	RGB8	redRGB841780	red	L	2	LR		1	1	To Food		0	To Nest		0
2014-05-21	Afternoon	confined - pheromone removed	confined	removed	RGB8	redRGB841780	red	L	3	LR		1	1	To Food	0	1	To Nest	0	2
2014-05-21	Afternoon	confined - pheromone removed	confined	removed	RGB8	redRGB841780	red	L	4	LR		1	1	To Food	4	0	To Nest
2014-05-21	Afternoon	confined - pheromone removed	confined	removed	RGB8	redRGB841780	red	L	5	LR		1	1	To Food			To Nest	3	2
2014-05-21	Afternoon	confined - pheromone removed	confined	removed	RGB8	redRGB841780	red	L	6	LR		1	1	To Food	3		To Nest	2	2
2014-05-21	Afternoon	confined - pheromone removed	confined	removed	RGB8	redRGB841780	red	L	7	RR		0	1	To Food			To Nest	0	1
2014-05-21	Afternoon	confined - pheromone removed	confined	removed	RGB8	yellowRGB841780	yellow	L	1	LR		1	1	To Food	0	0	To Nest		6
2014-05-21	Afternoon	confined - pheromone removed	confined	removed	RGB8	yellowRGB841780	yellow	L	2	LR		1	1	To Food			To Nest	4	0
2014-05-21	Afternoon	confined - pheromone removed	confined	removed	RGB8	yellowRGB841780	yellow	L	3	LR		1	1	To Food			To Nest	3	2
2014-05-21	Afternoon	confined - pheromone removed	confined	removed	RGB8	yellowRGB841780	yellow	L	4	LR		1	1	To Food			To Nest
2014-05-21	Afternoon	confined - pheromone removed	confined	removed	RGB8	yellowRGB841780	yellow	L	5	LR		1	1	To Food		2	To Nest		2
2014-05-21	Afternoon	confined - pheromone removed	confined	removed	RGB8	yellowRGB841780	yellow	L	6	LR		1	1	To Food		4	To Nest	2
2014-05-21	Afternoon	confined - pheromone removed	confined	removed	RGB8	yellowRGB841780	yellow	L	7	RR		0	1	To Food	0	0	To Nest
2014-05-21	Afternoon	confined - pheromone removed	confined	removed	6	blue641780	blue	L	1	LR		1	1	To Food	0	0	To Nest
2014-05-21	Afternoon	confined - pheromone removed	confined	removed	6	blue641780	blue	L	2	LR		1	1	To Food	0	0	To Nest
2014-05-21	Afternoon	confined - pheromone removed	confined	removed	6	blue641780	blue	L	3					To Food			To Nest
2014-05-21	Afternoon	confined - pheromone removed	confined	removed	6	blue641780	blue	L	4					To Food			To Nest
2014-05-21	Afternoon	confined - pheromone removed	confined	removed	6	blue641780	blue	L	5					To Food			To Nest
2014-05-21	Afternoon	confined - pheromone removed	confined	removed	6	blue641780	blue	L	6					To Food			To Nest
2014-05-21	Afternoon	confined - pheromone removed	confined	removed	6	blue641780	blue	L	7					To Food			To Nest
2014-05-21	Afternoon	confined - pheromone removed	confined	removed	6	orange641780	orange	L	1	LR		1	1	To Food	0	0	To Nest
2014-05-21	Afternoon	confined - pheromone removed	confined	removed	6	orange641780	orange	L	2	LR		1	1	To Food			To Nest
2014-05-21	Afternoon	confined - pheromone removed	confined	removed	6	orange641780	orange	L	3	LR		1	1	To Food	0	0	To Nest	0
2014-05-21	Afternoon	confined - pheromone removed	confined	removed	6	orange641780	orange	L	4	LR		1	1	To Food			To Nest	0	1
2014-05-21	Afternoon	confined - pheromone removed	confined	removed	6	orange641780	orange	L	5	LR		1	1	To Food	0	0	To Nest	0
2014-05-21	Afternoon	confined - pheromone removed	confined	removed	6	orange641780	orange	L	6	LR		1	1	To Food	0	0	To Nest	0	0
2014-05-21	Afternoon	confined - pheromone removed	confined	removed	6	orange641780	orange	L	7	RR		0	1	To Food	0	0	To Nest	0	0
2014-05-21	Afternoon	confined - pheromone removed	confined	removed	6	green641780	green	L	1	LR		1	1	To Food			To Nest	0
2014-05-21	Afternoon	confined - pheromone removed	confined	removed	6	green641780	green	L	2	LR		1	1	To Food	0	2	To Nest	10	2
2014-05-21	Afternoon	confined - pheromone removed	confined	removed	6	green641780	green	L	3	LR		1	1	To Food		0	To Nest
2014-05-21	Afternoon	confined - pheromone removed	confined	removed	6	green641780	green	L	4	LR		1	1	To Food	0		To Nest
2014-05-21	Afternoon	confined - pheromone removed	confined	removed	6	green641780	green	L	5	LR		1	1	To Food	0	3	To Nest	0
2014-05-21	Afternoon	confined - pheromone removed	confined	removed	6	green641780	green	L	6	LR		1	1	To Food		3	To Nest	0	1
2014-05-21	Afternoon	confined - pheromone removed	confined	removed	6	green641780	green	L	7	LR		1	1	To Food	0	0	To Nest	0	0
2014-05-21	Afternoon	confined - pheromone removed	confined	removed	6	red641780	red	L	1	LR		1	1	To Food			To Nest
2014-05-21	Afternoon	confined - pheromone removed	confined	removed	6	red641780	red	L	2	LR		1	1	To Food			To Nest	0	0
2014-05-21	Afternoon	confined - pheromone removed	confined	removed	6	red641780	red	L	3	LR		1	1	To Food			To Nest
2014-05-21	Afternoon	confined - pheromone removed	confined	removed	6	red641780	red	L	4	LR		1	1	To Food			To Nest
2014-05-21	Afternoon	confined - pheromone removed	confined	removed	6	red641780	red	L	5	LR		1	1	To Food	0	0	To Nest
2014-05-21	Afternoon	confined - pheromone removed	confined	removed	6	red641780	red	L	6	LR		1	1	To Food	0	0	To Nest	1	0
2014-05-21	Afternoon	confined - pheromone removed	confined	removed	6	red641780	red	L	7	RR		0	1	To Food	0	0	To Nest	1	0
2014-05-21	Afternoon	confined - pheromone removed	confined	removed	6	yellow641780	yellow	L	1	LR		1	1	To Food			To Nest	0	1
2014-05-21	Afternoon	confined - pheromone removed	confined	removed	6	yellow641780	yellow	L	2	LR		1	1	To Food			To Nest	0	2
2014-05-21	Afternoon	confined - pheromone removed	confined	removed	6	yellow641780	yellow	L	3	LR		1	1	To Food			To Nest
2014-05-21	Afternoon	confined - pheromone removed	confined	removed	6	yellow641780	yellow	L	4	LR		1	1	To Food			To Nest	1	3
2014-05-21	Afternoon	confined - pheromone removed	confined	removed	6	yellow641780	yellow	L	5	LR		1	1	To Food		4	To Nest	2	3
2014-05-21	Afternoon	confined - pheromone removed	confined	removed	6	yellow641780	yellow	L	6	LR		1	1	To Food		2	To Nest
2014-05-21	Afternoon	confined - pheromone removed	confined	removed	6	yellow641780	yellow	L	7	RR		0	1	To Food	2	2	To Nest	2	0
2014-05-22	Afternoon	confined - pheromone removed	confined	removed	11	silver1141781	silver	L	1	LR		1	1	To Food	3	1	To Nest	4	4
2014-05-22	Afternoon	confined - pheromone removed	confined	removed	11	silver1141781	silver	L	2	LR		1	1	To Food	2		To Nest	5	6
2014-05-22	Afternoon	confined - pheromone removed	confined	removed	11	silver1141781	silver	L	3	LR		1	1	To Food		6	To Nest	7	6
2014-05-22	Afternoon	confined - pheromone removed	confined	removed	11	silver1141781	silver	L	4	LR		1	1	To Food	2	4	To Nest	6	9
2014-05-22	Afternoon	confined - pheromone removed	confined	removed	11	silver1141781	silver	L	5	LR		1	1	To Food	2	4	To Nest
2014-05-22	Afternoon	confined - pheromone removed	confined	removed	11	silver1141781	silver	L	6	LR		1	1	To Food			To Nest	7	6
2014-05-22	Afternoon	confined - pheromone removed	confined	removed	11	silver1141781	silver	L	7	RR		0	1	To Food	6	3	To Nest
2014-05-22	Afternoon	confined - pheromone removed	confined	removed	11	orange1141781	orange	L	1					To Food			To Nest
2014-05-22	Afternoon	confined - pheromone removed	confined	removed	11	orange1141781	orange	L	2					To Food			To Nest
2014-05-22	Afternoon	confined - pheromone removed	confined	removed	11	orange1141781	orange	L	3					To Food			To Nest
2014-05-22	Afternoon	confined - pheromone removed	confined	removed	11	orange1141781	orange	L	4					To Food			To Nest
2014-05-22	Afternoon	confined - pheromone removed	confined	removed	11	orange1141781	orange	L	5					To Food			To Nest
2014-05-22	Afternoon	confined - pheromone removed	confined	removed	11	orange1141781	orange	L	6					To Food			To Nest
2014-05-22	Afternoon	confined - pheromone removed	confined	removed	11	orange1141781	orange	L	7					To Food			To Nest
2014-05-22	Afternoon	confined - pheromone removed	confined	removed	11	green1141781	green	L	1	LR		1	1	To Food			To Nest	0
2014-05-22	Afternoon	confined - pheromone removed	confined	removed	11	green1141781	green	L	2	LR		1	1	To Food			To Nest	4	2
2014-05-22	Afternoon	confined - pheromone removed	confined	removed	11	green1141781	green	L	3	LR		1	1	To Food			To Nest	5	6
2014-05-22	Afternoon	confined - pheromone removed	confined	removed	11	green1141781	green	L	4	LR		1	1	To Food	5		To Nest	4	3
2014-05-22	Afternoon	confined - pheromone removed	confined	removed	11	green1141781	green	L	5	LR		1	1	To Food		2	To Nest	3	4
2014-05-22	Afternoon	confined - pheromone removed	confined	removed	11	green1141781	green	L	6	LR		1	1	To Food			To Nest
2014-05-22	Afternoon	confined - pheromone removed	confined	removed	11	green1141781	green	L	7	RR		0	1	To Food	1	3	To Nest
2014-05-22	Afternoon	confined - pheromone removed	confined	removed	11	red1141781	red	L	1	LR		1	1	To Food			To Nest		0
2014-05-22	Afternoon	confined - pheromone removed	confined	removed	11	red1141781	red	L	2	LR		1	1	To Food		4	To Nest	3
2014-05-22	Afternoon	confined - pheromone removed	confined	removed	11	red1141781	red	L	3	LR		1	1	To Food		0	To Nest
2014-05-22	Afternoon	confined - pheromone removed	confined	removed	11	red1141781	red	L	4	LR		1	1	To Food		4	To Nest	5	7
2014-05-22	Afternoon	confined - pheromone removed	confined	removed	11	red1141781	red	L	5	LR		1	1	To Food		3	To Nest	4	1
2014-05-22	Afternoon	confined - pheromone removed	confined	removed	11	red1141781	red	L	6	LR		1	1	To Food	3	1	To Nest
2014-05-22	Afternoon	confined - pheromone removed	confined	removed	11	red1141781	red	L	7	LR		1	1	To Food			To Nest
2014-05-22	Afternoon	confined - pheromone removed	confined	removed	11	yellow1141781	yellow	L	1	LR		1	1	To Food			To Nest	3	3
2014-05-22	Afternoon	confined - pheromone removed	confined	removed	11	yellow1141781	yellow	L	2	LR		1	1	To Food		3	To Nest		4
2014-05-22	Afternoon	confined - pheromone removed	confined	removed	11	yellow1141781	yellow	L	3	LR		1	1	To Food		7	To Nest
2014-05-22	Afternoon	confined - pheromone removed	confined	removed	11	yellow1141781	yellow	L	4	LR		1	1	To Food	2		To Nest	6	4
2014-05-22	Afternoon	confined - pheromone removed	confined	removed	11	yellow1141781	yellow	L	5	LR		1	1	To Food	4	5	To Nest	3	6
2014-05-22	Afternoon	confined - pheromone removed	confined	removed	11	yellow1141781	yellow	L	6	LR		1	1	To Food	5		To Nest	2	5
2014-05-22	Afternoon	confined - pheromone removed	confined	removed	11	yellow1141781	yellow	L	7	RR		0	1	To Food	3	3	To Nest
2014-05-27	Morning	confined - pheromone allowed	confined	allowed	5	silver541786	silver	R	1	RL		1	1	food	0	0	nest	0	0
27.05.2014	Morning	confined - pheromone allowed	confined	allowed	5	silver527.05.2014	silver	R	2					food			nest
27.05.2014	Morning	confined - pheromone allowed	confined	allowed	5	silver527.05.2014	silver	R	3					food			nest
27.05.2014	Morning	confined - pheromone allowed	confined	allowed	5	silver527.05.2014	silver	R	4					food			nest
27.05.2014	Morning	confined - pheromone allowed	confined	allowed	5	silver527.05.2014	silver	R	5					food			nest
27.05.2014	Morning	confined - pheromone allowed	confined	allowed	5	silver527.05.2014	silver	R	6					food			nest
27.05.2014	Morning	confined - pheromone allowed	confined	allowed	5	silver527.05.2014	silver	R	7					food			nest
27.05.2014	Morning	confined - pheromone allowed	confined	allowed	5	yellow527.05.2014	yellow	R	1	RL		1	1	food			nest	4	2
27.05.2014	Morning	confined - pheromone allowed	confined	allowed	5	yellow527.05.2014	yellow	R	2	RL		1	1	food	4	3	nest	1
27.05.2014	Morning	confined - pheromone allowed	confined	allowed	5	yellow527.05.2014	yellow	R	3	RL		1	1	food	0	0	nest	3	3
27.05.2014	Morning	confined - pheromone allowed	confined	allowed	5	yellow527.05.2014	yellow	R	4	RL		1	1	food		2	nest	3	3
27.05.2014	Morning	confined - pheromone allowed	confined	allowed	5	yellow527.05.2014	yellow	R	5	RL		1	1	food	3		nest
27.05.2014	Morning	confined - pheromone allowed	confined	allowed	5	yellow527.05.2014	yellow	R	6	RL		1	1	food			nest	2	2
27.05.2014	Morning	confined - pheromone allowed	confined	allowed	5	yellow527.05.2014	yellow	R	7	LR		0	0	food	0	0	nest
27.05.2014	Morning	confined - pheromone allowed	confined	allowed	5	green527.05.2014	green	R	1	RL		1	1	food	0	0	nest		4
27.05.2014	Morning	confined - pheromone allowed	confined	allowed	5	green527.05.2014	green	R	2	RL		1	1	food	0	2	nest	4	3
27.05.2014	Morning	confined - pheromone allowed	confined	allowed	5	green527.05.2014	green	R	3	RL		1	1	food		0	nest	3	2
27.05.2014	Morning	confined - pheromone allowed	confined	allowed	5	green527.05.2014	green	R	4	RL		1	1	food	0	0	nest	0	0
27.05.2014	Morning	confined - pheromone allowed	confined	allowed	5	green527.05.2014	green	R	5	RL		1	1	food	2	0	nest	0	0
27.05.2014	Morning	confined - pheromone allowed	confined	allowed	5	green527.05.2014	green	R	6	RL		1	1	food	0	0	nest
27.05.2014	Morning	confined - pheromone allowed	confined	allowed	5	green527.05.2014	green	R	7	LL		0	1	food	0	0	nest
27.05.2014	Morning	confined - pheromone allowed	confined	allowed	5	red527.05.2014	red	R	1	RL		1	1	food	3	2	nest	7
27.05.2014	Morning	confined - pheromone allowed	confined	allowed	5	red527.05.2014	red	R	2	RL		1	1	food	0	1	nest	4
27.05.2014	Morning	confined - pheromone allowed	confined	allowed	5	red527.05.2014	red	R	3	RL		1	1	food	3	1	nest	2
27.05.2014	Morning	confined - pheromone allowed	confined	allowed	5	red527.05.2014	red	R	4	RL		1	1	food		0	nest	0	2
27.05.2014	Morning	confined - pheromone allowed	confined	allowed	5	red527.05.2014	red	R	5	RL		1	1	food			nest
27.05.2014	Morning	confined - pheromone allowed	confined	allowed	5	red527.05.2014	red	R	6	RL		1	1	food	2	3	nest	0	0
27.05.2014	Morning	confined - pheromone allowed	confined	allowed	5	red527.05.2014	red	R	7	RL		1	1	food	0	3	nest
27.05.2014	Morning	confined - pheromone allowed	confined	allowed	5	orange527.05.2014	orange	R	1	RL		1	1	food			nest
27.05.2014	Morning	confined - pheromone allowed	confined	allowed	5	orange527.05.2014	orange	R	2	RL		1	1	food	2	2	nest
27.05.2014	Morning	confined - pheromone allowed	confined	allowed	5	orange527.05.2014	orange	R	3	RL		1	1	food	2	1	nest		2
27.05.2014	Morning	confined - pheromone allowed	confined	allowed	5	orange527.05.2014	orange	R	4	RL		1	1	food	3	1	nest	0	3
27.05.2014	Morning	confined - pheromone allowed	confined	allowed	5	orange527.05.2014	orange	R	5	RL		1	1	food		0	nest	0	0
27.05.2014	Morning	confined - pheromone allowed	confined	allowed	5	orange527.05.2014	orange	R	6	RL		1	1	food	0	1	nest	0	1
27.05.2014	Morning	confined - pheromone allowed	confined	allowed	5	orange527.05.2014	orange	R	7	LR		0	0	food	3	1	nest
2014-05-27	Morning	confined - pheromone allowed	confined	allowed	888	blue88841786	blue	R	1	RL		1	1	food	0	1	nest	3
27.05.2014	Morning	confined - pheromone allowed	confined	allowed	888	blue88827.05.2014	blue	R	2	RL		1	1	food	0	0	nest	1	1
27.05.2014	Morning	confined - pheromone allowed	confined	allowed	888	blue88827.05.2014	blue	R	3	RL		1	1	food			nest	2	3
27.05.2014	Morning	confined - pheromone allowed	confined	allowed	888	blue88827.05.2014	blue	R	4	RL		1	1	food	0	0	nest	0	1
27.05.2014	Morning	confined - pheromone allowed	confined	allowed	888	blue88827.05.2014	blue	R	5	RL		1	1	food			nest	2	0
27.05.2014	Morning	confined - pheromone allowed	confined	allowed	888	blue88827.05.2014	blue	R	6	RL		1	1	food	1	1	nest	0	1
27.05.2014	Morning	confined - pheromone allowed	confined	allowed	888	blue88827.05.2014	blue	R	7	LL		0	1	food	0	0	nest
27.05.2014	Morning	confined - pheromone allowed	confined	allowed	888	yellow88827.05.2014	yellow	R	1	RL		1	1	food	0	0	nest	2	0
27.05.2014	Morning	confined - pheromone allowed	confined	allowed	888	yellow88827.05.2014	yellow	R	2	RL		1	1	food	0	0	nest	2	2
27.05.2014	Morning	confined - pheromone allowed	confined	allowed	888	yellow88827.05.2014	yellow	R	3	RL		1	1	food	0	0	nest	1
27.05.2014	Morning	confined - pheromone allowed	confined	allowed	888	yellow88827.05.2014	yellow	R	4	RL		1	1	food	1	0	nest	1	0
27.05.2014	Morning	confined - pheromone allowed	confined	allowed	888	yellow88827.05.2014	yellow	R	5	RL		1	1	food	0	0	nest	0	1
27.05.2014	Morning	confined - pheromone allowed	confined	allowed	888	yellow88827.05.2014	yellow	R	6	RL		1	1	food	0	0	nest	0	0
27.05.2014	Morning	confined - pheromone allowed	confined	allowed	888	yellow88827.05.2014	yellow	R	7	LL		0	1	food	0	0	nest
27.05.2014	Morning	confined - pheromone allowed	confined	allowed	888	green88827.05.2014	green	R	1	RL		1	1	food	1	0	nest	4	4
27.05.2014	Morning	confined - pheromone allowed	confined	allowed	888	green88827.05.2014	green	R	2	RL		1	1	food	1	1	nest
27.05.2014	Morning	confined - pheromone allowed	confined	allowed	888	green88827.05.2014	green	R	3	RL		1	1	food	0	1	nest		2
27.05.2014	Morning	confined - pheromone allowed	confined	allowed	888	green88827.05.2014	green	R	4	RL		1	1	food	3	2	nest
27.05.2014	Morning	confined - pheromone allowed	confined	allowed	888	green88827.05.2014	green	R	5	RL		1	1	food	2	2	nest	0	0
27.05.2014	Morning	confined - pheromone allowed	confined	allowed	888	green88827.05.2014	green	R	6	RL		1	1	food	0	0	nest	0	1
27.05.2014	Morning	confined - pheromone allowed	confined	allowed	888	green88827.05.2014	green	R	7	LL		0	1	food	1	0	nest
27.05.2014	Morning	confined - pheromone allowed	confined	allowed	888	red88827.05.2014	red	R	1	RL		1	1	food	0	0	nest	1
27.05.2014	Morning	confined - pheromone allowed	confined	allowed	888	red88827.05.2014	red	R	2	RL		1	1	food	0	0	nest		4
27.05.2014	Morning	confined - pheromone allowed	confined	allowed	888	red88827.05.2014	red	R	3	RL		1	1	food	2	0	nest	4
27.05.2014	Morning	confined - pheromone allowed	confined	allowed	888	red88827.05.2014	red	R	4	RL		1	1	food			nest	6	2
27.05.2014	Morning	confined - pheromone allowed	confined	allowed	888	red88827.05.2014	red	R	5	RL		1	1	food	3	0	nest	2	0
27.05.2014	Morning	confined - pheromone allowed	confined	allowed	888	red88827.05.2014	red	R	6	RL		1	1	food	3	4	nest
27.05.2014	Morning	confined - pheromone allowed	confined	allowed	888	red88827.05.2014	red	R	7	LL		0	1	food	0	0	nest
27.05.2014	Morning	confined - pheromone allowed	confined	allowed	888	orange88827.05.2014	orange	R	1	RL		1	1	food	0	0	nest	1	2
27.05.2014	Morning	confined - pheromone allowed	confined	allowed	888	orange88827.05.2014	orange	R	2	RL		1	1	food	3	1	nest		1
27.05.2014	Morning	confined - pheromone allowed	confined	allowed	888	orange88827.05.2014	orange	R	3	RL		1	1	food	0	1	nest	1	2
27.05.2014	Morning	confined - pheromone allowed	confined	allowed	888	orange88827.05.2014	orange	R	4	RL		1	1	food	0	0	nest	0	0
27.05.2014	Morning	confined - pheromone allowed	confined	allowed	888	orange88827.05.2014	orange	R	5	RL		1	1	food			nest	0	0
27.05.2014	Morning	confined - pheromone allowed	confined	allowed	888	orange88827.05.2014	orange	R	6	RL		1	1	food		2	nest
27.05.2014	Morning	confined - pheromone allowed	confined	allowed	888	orange88827.05.2014	orange	R	7	LL		0	1	food	3	0	nest
2014-05-27	Afternoon	confined - pheromone allowed	confined	allowed	888	blue88841786	blue	L	1	LR		1	1	food		0	nest		3
27.05.2014	Afternoon	confined - pheromone allowed	confined	allowed	888	blue88827.05.2014	blue	L	2	LR		1	1	food	1	0	nest	2	3
27.05.2014	Afternoon	confined - pheromone allowed	confined	allowed	888	blue88827.05.2014	blue	L	3	LR		1	1	food	1		nest	2	1
27.05.2014	Afternoon	confined - pheromone allowed	confined	allowed	888	blue88827.05.2014	blue	L	4	LR		1	1	food	1	0	nest	4	3
27.05.2014	Afternoon	confined - pheromone allowed	confined	allowed	888	blue88827.05.2014	blue	L	5	LR		1	1	food	0	0	nest	1	2
27.05.2014	Afternoon	confined - pheromone allowed	confined	allowed	888	blue88827.05.2014	blue	L	6	LR		1	1	food		1	nest	1	1
27.05.2014	Afternoon	confined - pheromone allowed	confined	allowed	888	blue88827.05.2014	blue	L	7	L*R	1			food	0	0	nest
27.05.2014	Afternoon	confined - pheromone allowed	confined	allowed	888	yellow88827.05.2014	yellow	L	1	LR		1	1	food	0	0	nest	2	3
27.05.2014	Afternoon	confined - pheromone allowed	confined	allowed	888	yellow88827.05.2014	yellow	L	2	LR		1	1	food	0	0	nest	0	0
27.05.2014	Afternoon	confined - pheromone allowed	confined	allowed	888	yellow88827.05.2014	yellow	L	3	LR		1	1	food	2		nest	1	3
27.05.2014	Afternoon	confined - pheromone allowed	confined	allowed	888	yellow88827.05.2014	yellow	L	4	LR		1	1	food	2	1	nest	3	2
27.05.2014	Afternoon	confined - pheromone allowed	confined	allowed	888	yellow88827.05.2014	yellow	L	5	LR		1	1	food	3	1	nest	0	1
27.05.2014	Afternoon	confined - pheromone allowed	confined	allowed	888	yellow88827.05.2014	yellow	L	6	LR		1	1	food	1	1	nest	0	0
27.05.2014	Afternoon	confined - pheromone allowed	confined	allowed	888	yellow88827.05.2014	yellow	L	7	L*R	1			food	0	0	nest
27.05.2014	Afternoon	confined - pheromone allowed	confined	allowed	888	green88827.05.2014	green	L	1	LR		1	1	food	2	0	nest
27.05.2014	Afternoon	confined - pheromone allowed	confined	allowed	888	green88827.05.2014	green	L	2	LR		1	1	food			nest	2	2
27.05.2014	Afternoon	confined - pheromone allowed	confined	allowed	888	green88827.05.2014	green	L	3	LR		1	1	food	0	0	nest	1	2
27.05.2014	Afternoon	confined - pheromone allowed	confined	allowed	888	green88827.05.2014	green	L	4	LR		1	1	food	1	0	nest		1
27.05.2014	Afternoon	confined - pheromone allowed	confined	allowed	888	green88827.05.2014	green	L	5	LR		1	1	food		0	nest	1	1
27.05.2014	Afternoon	confined - pheromone allowed	confined	allowed	888	green88827.05.2014	green	L	6	LR		1	1	food	0	1	nest	1	1
27.05.2014	Afternoon	confined - pheromone allowed	confined	allowed	888	green88827.05.2014	green	L	7	L*R	1			food			nest
27.05.2014	Afternoon	confined - pheromone allowed	confined	allowed	888	red88827.05.2014	red	L	1	LR		1	1	food			nest
27.05.2014	Afternoon	confined - pheromone allowed	confined	allowed	888	red88827.05.2014	red	L	2	LR		1	1	food	0	0	nest	0
27.05.2014	Afternoon	confined - pheromone allowed	confined	allowed	888	red88827.05.2014	red	L	3	LR		1	1	food	2	1	nest	3	4
27.05.2014	Afternoon	confined - pheromone allowed	confined	allowed	888	red88827.05.2014	red	L	4	LR		1	1	food	0	1	nest	1	0
27.05.2014	Afternoon	confined - pheromone allowed	confined	allowed	888	red88827.05.2014	red	L	5	LR		1	1	food	0	0	nest	2	0
27.05.2014	Afternoon	confined - pheromone allowed	confined	allowed	888	red88827.05.2014	red	L	6	LR		1	1	food	0	0	nest	0	0
27.05.2014	Afternoon	confined - pheromone allowed	confined	allowed	888	red88827.05.2014	red	L	7	LR				food			nest	0	1
27.05.2014	Afternoon	confined - pheromone allowed	confined	allowed	888	orange88827.05.2014	orange	L	1	LR		1	1	food	0	0	nest
27.05.2014	Afternoon	confined - pheromone allowed	confined	allowed	888	orange88827.05.2014	orange	L	2	LR		1	1	food	0	0	nest	0	0
27.05.2014	Afternoon	confined - pheromone allowed	confined	allowed	888	orange88827.05.2014	orange	L	3	LR		1	1	food			nest
27.05.2014	Afternoon	confined - pheromone allowed	confined	allowed	888	orange88827.05.2014	orange	L	4					food			nest
27.05.2014	Afternoon	confined - pheromone allowed	confined	allowed	888	orange88827.05.2014	orange	L	5					food			nest
27.05.2014	Afternoon	confined - pheromone allowed	confined	allowed	888	orange88827.05.2014	orange	L	6					food			nest
27.05.2014	Afternoon	confined - pheromone allowed	confined	allowed	888	orange88827.05.2014	orange	L	7					food			nest
28.05.2014	Morning	confined - pheromone removed	confined	removed	3	blue328.05.2014	blue	R	1	RL		1	1	food	2		nest
28.05.2014	Morning	confined - pheromone removed	confined	removed	3	blue328.05.2014	blue	R	2	RL		1	1	food		0	nest
28.05.2014	Morning	confined - pheromone removed	confined	removed	3	blue328.05.2014	blue	R	3	RL		1	1	food	2	0	nest
28.05.2014	Morning	confined - pheromone removed	confined	removed	3	blue328.05.2014	blue	R	4	RL		1	1	food			nest	5	4
28.05.2014	Morning	confined - pheromone removed	confined	removed	3	blue328.05.2014	blue	R	5	RL		1	1	food	0	2	nest	2	2
28.05.2014	Morning	confined - pheromone removed	confined	removed	3	blue328.05.2014	blue	R	6	RL		1	1	food		4	nest	5	6
28.05.2014	Morning	confined - pheromone removed	confined	removed	3	blue328.05.2014	blue	R	7	LL		0	1	food	0	0	nest
28.05.2014	Morning	confined - pheromone removed	confined	removed	3	yellow328.05.2014	yellow	R	1	RL		1	1	food	0	0	nest
28.05.2014	Morning	confined - pheromone removed	confined	removed	3	yellow328.05.2014	yellow	R	2	RL		1	1	food	0	0	nest
28.05.2014	Morning	confined - pheromone removed	confined	removed	3	yellow328.05.2014	yellow	R	3	RL		1	1	food	0	2	nest	2	1
28.05.2014	Morning	confined - pheromone removed	confined	removed	3	yellow328.05.2014	yellow	R	4	RL		1	1	food	0	0	nest
28.05.2014	Morning	confined - pheromone removed	confined	removed	3	yellow328.05.2014	yellow	R	5	RL		1	1	food	0		nest	2
28.05.2014	Morning	confined - pheromone removed	confined	removed	3	yellow328.05.2014	yellow	R	6	RL		1	1	food			nest	0	2
28.05.2014	Morning	confined - pheromone removed	confined	removed	3	yellow328.05.2014	yellow	R	7	LL		0	1	food	1	3	nest
28.05.2014	Morning	confined - pheromone removed	confined	removed	3	green328.05.2014	green	R	1	RL		1	1	food	2	6	nest
28.05.2014	Morning	confined - pheromone removed	confined	removed	3	green328.05.2014	green	R	2	RL		1	1	food		0	nest	4	5
28.05.2014	Morning	confined - pheromone removed	confined	removed	3	green328.05.2014	green	R	3	RL		1	1	food	0	0	nest
28.05.2014	Morning	confined - pheromone removed	confined	removed	3	green328.05.2014	green	R	4	RL		1	1	food	0	0	nest	4	5
28.05.2014	Morning	confined - pheromone removed	confined	removed	3	green328.05.2014	green	R	5	RL		1	1	food	0	1	nest	6	4
28.05.2014	Morning	confined - pheromone removed	confined	removed	3	green328.05.2014	green	R	6	RL		1	1	food	0	0	nest		4
28.05.2014	Morning	confined - pheromone removed	confined	removed	3	green328.05.2014	green	R	7	LR		0	0	food			nest
28.05.2014	Morning	confined - pheromone removed	confined	removed	3	red328.05.2014	red	R	1	RL		1	1	food	0	1	nest
28.05.2014	Morning	confined - pheromone removed	confined	removed	3	red328.05.2014	red	R	2	RL		1	1	food			nest		4
28.05.2014	Morning	confined - pheromone removed	confined	removed	3	red328.05.2014	red	R	3	RL		1	1	food	4	1	nest	2	4
28.05.2014	Morning	confined - pheromone removed	confined	removed	3	red328.05.2014	red	R	4	RL		1	1	food	3	2	nest	2	5
28.05.2014	Morning	confined - pheromone removed	confined	removed	3	red328.05.2014	red	R	5	RL		1	1	food		4	nest	3	5
28.05.2014	Morning	confined - pheromone removed	confined	removed	3	red328.05.2014	red	R	6	RL		1	1	food			nest		6
28.05.2014	Morning	confined - pheromone removed	confined	removed	3	red328.05.2014	red	R	7	L*R	1	0	0	food			nest
28.05.2014	Morning	confined - pheromone removed	confined	removed	3	orange328.05.2014	orange	R	1	RL		1	1	food	1	0	nest	4	5
28.05.2014	Morning	confined - pheromone removed	confined	removed	3	orange328.05.2014	orange	R	2	RL		1	1	food	0	0	nest	5	6
28.05.2014	Morning	confined - pheromone removed	confined	removed	3	orange328.05.2014	orange	R	3	RL		1	1	food			nest	6	4
28.05.2014	Morning	confined - pheromone removed	confined	removed	3	orange328.05.2014	orange	R	4	RL		1	1	food			nest		6
28.05.2014	Morning	confined - pheromone removed	confined	removed	3	orange328.05.2014	orange	R	5	RL		1	1	food	0		nest		4
28.05.2014	Morning	confined - pheromone removed	confined	removed	3	orange328.05.2014	orange	R	6	RL		1	1	food			nest	6	5
28.05.2014	Morning	confined - pheromone removed	confined	removed	3	orange328.05.2014	orange	R	7	LL		0	1	food			nest
2014-05-28	Afternoon	confined - pheromone removed	confined	removed	6	blue641787	blue	R	1	RL		1	1	food	0	0	nest	1	0
28.05.2014	Afternoon	confined - pheromone removed	confined	removed	6	blue628.05.2014	blue	R	2	RL		1	1	food	0	0	nest		0
28.05.2014	Afternoon	confined - pheromone removed	confined	removed	6	blue628.05.2014	blue	R	3	RL		1	1	food	0		nest
28.05.2014	Afternoon	confined - pheromone removed	confined	removed	6	blue628.05.2014	blue	R	4	RL		1	1	food		2	nest	2	1
28.05.2014	Afternoon	confined - pheromone removed	confined	removed	6	blue628.05.2014	blue	R	5	RL		1	1	food	2	2	nest	2	4
28.05.2014	Afternoon	confined - pheromone removed	confined	removed	6	blue628.05.2014	blue	R	6	RL		1	1	food	0	1	nest	2	3
28.05.2014	Afternoon	confined - pheromone removed	confined	removed	6	blue628.05.2014	blue	R	7	LL		0	1	food	0	0	nest
28.05.2014	Afternoon	confined - pheromone removed	confined	removed	6	yellow628.05.2014	yellow	R	1	RL		1	1	food	4	5	nest	4	5
28.05.2014	Afternoon	confined - pheromone removed	confined	removed	6	yellow628.05.2014	yellow	R	2	RL		1	1	food	5		nest	5
28.05.2014	Afternoon	confined - pheromone removed	confined	removed	6	yellow628.05.2014	yellow	R	3	RL		1	1	food	4		nest	4
28.05.2014	Afternoon	confined - pheromone removed	confined	removed	6	yellow628.05.2014	yellow	R	4	RL		1	1	food	3	2	nest	3	2
28.05.2014	Afternoon	confined - pheromone removed	confined	removed	6	yellow628.05.2014	yellow	R	5	RL		1	1	food	3		nest	3
28.05.2014	Afternoon	confined - pheromone removed	confined	removed	6	yellow628.05.2014	yellow	R	6	RL		1	1	food	1	3	nest	1	3
28.05.2014	Afternoon	confined - pheromone removed	confined	removed	6	yellow628.05.2014	yellow	R	7	RL		1	1	food			nest
28.05.2014	Afternoon	confined - pheromone removed	confined	removed	6	green628.05.2014	green	R	1	RL		1	1	food		2	nest	4
28.05.2014	Afternoon	confined - pheromone removed	confined	removed	6	green628.05.2014	green	R	2	RL		1	1	food		1	nest	1	4
28.05.2014	Afternoon	confined - pheromone removed	confined	removed	6	green628.05.2014	green	R	3	RL		1	1	food	1	2	nest	3
28.05.2014	Afternoon	confined - pheromone removed	confined	removed	6	green628.05.2014	green	R	4	RL		1	1	food	3	5	nest	4	3
28.05.2014	Afternoon	confined - pheromone removed	confined	removed	6	green628.05.2014	green	R	5	RL		1	1	food	4	5	nest	4	5
28.05.2014	Afternoon	confined - pheromone removed	confined	removed	6	green628.05.2014	green	R	6	RL		1	1	food		1	nest	1	3
28.05.2014	Afternoon	confined - pheromone removed	confined	removed	6	green628.05.2014	green	R	7	RL		1	1	food	3	3	nest
28.05.2014	Afternoon	confined - pheromone removed	confined	removed	6	red628.05.2014	red	R	1	RL		1	1	food			nest	2	3
28.05.2014	Afternoon	confined - pheromone removed	confined	removed	6	red628.05.2014	red	R	2	RL		1	1	food	0	0	nest
28.05.2014	Afternoon	confined - pheromone removed	confined	removed	6	red628.05.2014	red	R	3	RL		1	1	food	0	1	nest	4
28.05.2014	Afternoon	confined - pheromone removed	confined	removed	6	red628.05.2014	red	R	4	RL		1	1	food	4	2	nest
28.05.2014	Afternoon	confined - pheromone removed	confined	removed	6	red628.05.2014	red	R	5	RL		1	1	food	1	3	nest	1
28.05.2014	Afternoon	confined - pheromone removed	confined	removed	6	red628.05.2014	red	R	6	RL		1	1	food			nest	1	1
28.05.2014	Afternoon	confined - pheromone removed	confined	removed	6	red628.05.2014	red	R	7	LL		0	1	food	0	0	nest
28.05.2014	Afternoon	confined - pheromone removed	confined	removed	6	orange628.05.2014	orange	R	1	RL		1	1	food			nest	4	4
28.05.2014	Afternoon	confined - pheromone removed	confined	removed	6	orange628.05.2014	orange	R	2	RL		1	1	food			nest		3
28.05.2014	Afternoon	confined - pheromone removed	confined	removed	6	orange628.05.2014	orange	R	3	RL		1	1	food	0	1	nest	0	3
28.05.2014	Afternoon	confined - pheromone removed	confined	removed	6	orange628.05.2014	orange	R	4	RL		1	1	food			nest	2	0
28.05.2014	Afternoon	confined - pheromone removed	confined	removed	6	orange628.05.2014	orange	R	5	RL		1	1	food	0	0	nest	0	1
28.05.2014	Afternoon	confined - pheromone removed	confined	removed	6	orange628.05.2014	orange	R	6	RL		1	1	food			nest	0	0
28.05.2014	Afternoon	confined - pheromone removed	confined	removed	6	orange628.05.2014	orange	R	7	LL		0	1	food	0	0	nest
2014-05-28	Afternoon	confined - pheromone removed	confined	removed	888split	blue888split41787	blue	R	1	RL		1	1	food	0		nest		3
28.05.2014	Afternoon	confined - pheromone removed	confined	removed	888split	blue888split28.05.2014	blue	R	2	RL		1	1	food			nest	0	0
28.05.2014	Afternoon	confined - pheromone removed	confined	removed	888split	blue888split28.05.2014	blue	R	3	RL		1	1	food	2	0	nest	2	3
28.05.2014	Afternoon	confined - pheromone removed	confined	removed	888split	blue888split28.05.2014	blue	R	4	RL		1	1	food	0	0	nest
28.05.2014	Afternoon	confined - pheromone removed	confined	removed	888split	blue888split28.05.2014	blue	R	5	RL		1	1	food	0	0	nest	2
28.05.2014	Afternoon	confined - pheromone removed	confined	removed	888split	blue888split28.05.2014	blue	R	6	RL		1	1	food	1	0	nest
28.05.2014	Afternoon	confined - pheromone removed	confined	removed	888split	blue888split28.05.2014	blue	R	7	LL		0	1	food			nest
28.05.2014	Afternoon	confined - pheromone removed	confined	removed	888split	yellow888split28.05.2014	yellow	R	1	RL		1	1	food			nest	2
28.05.2014	Afternoon	confined - pheromone removed	confined	removed	888split	yellow888split28.05.2014	yellow	R	2	RL		1	1	food	4	0	nest	0	3
28.05.2014	Afternoon	confined - pheromone removed	confined	removed	888split	yellow888split28.05.2014	yellow	R	3	RL		1	1	food	3	2	nest		5
28.05.2014	Afternoon	confined - pheromone removed	confined	removed	888split	yellow888split28.05.2014	yellow	R	4	RL		1	1	food	4	6	nest	2	2
28.05.2014	Afternoon	confined - pheromone removed	confined	removed	888split	yellow888split28.05.2014	yellow	R	5	RL		1	1	food			nest	6	5
28.05.2014	Afternoon	confined - pheromone removed	confined	removed	888split	yellow888split28.05.2014	yellow	R	6	RL		1	1	food		4	nest	6	7
28.05.2014	Afternoon	confined - pheromone removed	confined	removed	888split	yellow888split28.05.2014	yellow	R	7	LL		0	1	food	4	7	nest
28.05.2014	Afternoon	confined - pheromone removed	confined	removed	888split	green888split28.05.2014	green	R	1	RL		1	1	food			nest
28.05.2014	Afternoon	confined - pheromone removed	confined	removed	888split	green888split28.05.2014	green	R	2					food			nest
28.05.2014	Afternoon	confined - pheromone removed	confined	removed	888split	green888split28.05.2014	green	R	3					food			nest
28.05.2014	Afternoon	confined - pheromone removed	confined	removed	888split	green888split28.05.2014	green	R	4					food			nest
28.05.2014	Afternoon	confined - pheromone removed	confined	removed	888split	green888split28.05.2014	green	R	5					food			nest
28.05.2014	Afternoon	confined - pheromone removed	confined	removed	888split	green888split28.05.2014	green	R	6					food			nest
28.05.2014	Afternoon	confined - pheromone removed	confined	removed	888split	green888split28.05.2014	green	R	7					food			nest
28.05.2014	Afternoon	confined - pheromone removed	confined	removed	888split	red888split28.05.2014	red	R	1	RL		1	1	food			nest		1
28.05.2014	Afternoon	confined - pheromone removed	confined	removed	888split	red888split28.05.2014	red	R	2	RL		1	1	food			nest
28.05.2014	Afternoon	confined - pheromone removed	confined	removed	888split	red888split28.05.2014	red	R	3	RL		1	1	food	0	0	nest	0	0
28.05.2014	Afternoon	confined - pheromone removed	confined	removed	888split	red888split28.05.2014	red	R	4	RL		1	1	food	0	0	nest	1	0
28.05.2014	Afternoon	confined - pheromone removed	confined	removed	888split	red888split28.05.2014	red	R	5	RL		1	1	food	0	0	nest
28.05.2014	Afternoon	confined - pheromone removed	confined	removed	888split	red888split28.05.2014	red	R	6	RL		1	1	food	0	0	nest
28.05.2014	Afternoon	confined - pheromone removed	confined	removed	888split	red888split28.05.2014	red	R	7	RL		1	1	food	0	1	nest
28.05.2014	Afternoon	confined - pheromone removed	confined	removed	888split	orange888split28.05.2014	orange	R	1	RL		1	1	food	0	2	nest
28.05.2014	Afternoon	confined - pheromone removed	confined	removed	888split	orange888split28.05.2014	orange	R	2	RL		1	1	food	0	0	nest
28.05.2014	Afternoon	confined - pheromone removed	confined	removed	888split	orange888split28.05.2014	orange	R	3	RL		1	1	food	1	0	nest	3	2
28.05.2014	Afternoon	confined - pheromone removed	confined	removed	888split	orange888split28.05.2014	orange	R	4	RL		1	1	food			nest	0	0
28.05.2014	Afternoon	confined - pheromone removed	confined	removed	888split	orange888split28.05.2014	orange	R	5	RL		1	1	food			nest		3
28.05.2014	Afternoon	confined - pheromone removed	confined	removed	888split	orange888split28.05.2014	orange	R	6	RL		1	1	food	0	1	nest
28.05.2014	Afternoon	confined - pheromone removed	confined	removed	888split	orange888split28.05.2014	orange	R	7	R*L	1	1	1	food	0	0	nest
2014-05-28	Morning	confined - pheromone removed	confined	removed	888split	blue888split41787	blue	L	1	LR		1	1	food		3	nest	3	2
28.05.2014	Morning	confined - pheromone removed	confined	removed	888split	blue888split28.05.2014	blue	L	2	LR		1	1	food			nest	1	4
28.05.2014	Morning	confined - pheromone removed	confined	removed	888split	blue888split28.05.2014	blue	L	3	LR		1	1	food	1	1	nest	3
28.05.2014	Morning	confined - pheromone removed	confined	removed	888split	blue888split28.05.2014	blue	L	4	LR		1	1	food	0	0	nest	0
28.05.2014	Morning	confined - pheromone removed	confined	removed	888split	blue888split28.05.2014	blue	L	5	LR		1	1	food	2	1	nest	0
28.05.2014	Morning	confined - pheromone removed	confined	removed	888split	blue888split28.05.2014	blue	L	6	LR		1	1	food	0	0	nest	0	0
28.05.2014	Morning	confined - pheromone removed	confined	removed	888split	blue888split28.05.2014	blue	L	7	RR		0	1	food			nest
28.05.2014	Morning	confined - pheromone removed	confined	removed	888split	yellow888split28.05.2014	yellow	L	1	LR		1	1	food	2	0	nest	6	5
28.05.2014	Morning	confined - pheromone removed	confined	removed	888split	yellow888split28.05.2014	yellow	L	2	LR		1	1	food	0	1	nest	6	6
28.05.2014	Morning	confined - pheromone removed	confined	removed	888split	yellow888split28.05.2014	yellow	L	3	LR		1	1	food		1	nest	4	4
28.05.2014	Morning	confined - pheromone removed	confined	removed	888split	yellow888split28.05.2014	yellow	L	4	LR		1	1	food			nest
28.05.2014	Morning	confined - pheromone removed	confined	removed	888split	yellow888split28.05.2014	yellow	L	5	LR		1	1	food	1	0	nest	1	2
28.05.2014	Morning	confined - pheromone removed	confined	removed	888split	yellow888split28.05.2014	yellow	L	6	LR		1	1	food	0	2	nest		0
28.05.2014	Morning	confined - pheromone removed	confined	removed	888split	yellow888split28.05.2014	yellow	L	7	RL		0	0	food	1	0	nest
28.05.2014	Morning	confined - pheromone removed	confined	removed	888split	green888split28.05.2014	green	L	1	LR		1	1	food	4	0	nest	0
28.05.2014	Morning	confined - pheromone removed	confined	removed	888split	green888split28.05.2014	green	L	2	LR		1	1	food	0	0	nest		0
28.05.2014	Morning	confined - pheromone removed	confined	removed	888split	green888split28.05.2014	green	L	3	LR		1	1	food		1	nest	0	1
28.05.2014	Morning	confined - pheromone removed	confined	removed	888split	green888split28.05.2014	green	L	4	LR		1	1	food	0	0	nest	0	0
28.05.2014	Morning	confined - pheromone removed	confined	removed	888split	green888split28.05.2014	green	L	5	LR		1	1	food	0	0	nest	0	0
28.05.2014	Morning	confined - pheromone removed	confined	removed	888split	green888split28.05.2014	green	L	6	LR		1	1	food		4	nest	0	1
28.05.2014	Morning	confined - pheromone removed	confined	removed	888split	green888split28.05.2014	green	L	7	RR		0	1	food	0	0	nest
28.05.2014	Morning	confined - pheromone removed	confined	removed	888split	red888split28.05.2014	red	L	1	LR		1	1	food			nest
28.05.2014	Morning	confined - pheromone removed	confined	removed	888split	red888split28.05.2014	red	L	2	LR		1	1	food	0	0	nest
28.05.2014	Morning	confined - pheromone removed	confined	removed	888split	red888split28.05.2014	red	L	3	LR		1	1	food	1	0	nest		1
28.05.2014	Morning	confined - pheromone removed	confined	removed	888split	red888split28.05.2014	red	L	4	LR		1	1	food		1	nest	2	4
28.05.2014	Morning	confined - pheromone removed	confined	removed	888split	red888split28.05.2014	red	L	5	LR		1	1	food		5	nest	1
28.05.2014	Morning	confined - pheromone removed	confined	removed	888split	red888split28.05.2014	red	L	6	LR		1	1	food	4	1	nest
28.05.2014	Morning	confined - pheromone removed	confined	removed	888split	red888split28.05.2014	red	L	7	RL		0	0	food			nest
28.05.2014	Morning	confined - pheromone removed	confined	removed	888split	orange888split28.05.2014	orange	L	1	LR		1	1	food			nest
28.05.2014	Morning	confined - pheromone removed	confined	removed	888split	orange888split28.05.2014	orange	L	2	LR		1	1	food			nest
28.05.2014	Morning	confined - pheromone removed	confined	removed	888split	orange888split28.05.2014	orange	L	3	LR		1	1	food			nest
28.05.2014	Morning	confined - pheromone removed	confined	removed	888split	orange888split28.05.2014	orange	L	4	LR		1	1	food			nest
28.05.2014	Morning	confined - pheromone removed	confined	removed	888split	orange888split28.05.2014	orange	L	5	LR		1	1	food			nest
28.05.2014	Morning	confined - pheromone removed	confined	removed	888split	orange888split28.05.2014	orange	L	6	LR		1	1	food			nest
28.05.2014	Morning	confined - pheromone removed	confined	removed	888split	orange888split28.05.2014	orange	L	7	RR		0	1	food			nest
2014-06-10	Afternoon	confined - pheromone allowed	confined	allowed	5	blue541800	blue	L	0					food			nest	0	1
2014-06-10	Afternoon	confined - pheromone allowed	confined	allowed	5	blue541800	blue	L	1	LR		1	1	food	0	0	nest	1
2014-06-10	Afternoon	confined - pheromone allowed	confined	allowed	5	blue541800	blue	L	2	LR		1	1	food	1	1	nest	2
2014-06-10	Afternoon	confined - pheromone allowed	confined	allowed	5	blue541800	blue	L	3	LR		1	1	food	0	0	nest	2	0
2014-06-10	Afternoon	confined - pheromone allowed	confined	allowed	5	blue541800	blue	L	4	LR		1	1	food	2	0	nest	2
2014-06-10	Afternoon	confined - pheromone allowed	confined	allowed	5	blue541800	blue	L	5	LR		1	1	food	2	2	nest	2	2
2014-06-10	Afternoon	confined - pheromone allowed	confined	allowed	5	blue541800	blue	L	6	LR		1	1	food	4	5	nest	2	0
2014-06-10	Afternoon	confined - pheromone allowed	confined	allowed	5	blue541800	blue	L	7	RL		0	0	food	0	0	nest
2014-06-10	Afternoon	confined - pheromone allowed	confined	allowed	5	yellow541800	yellow	L	0					food			nest	2	4
2014-06-10	Afternoon	confined - pheromone allowed	confined	allowed	5	yellow541800	yellow	L	1	LR		1	1	food	2	4	nest	1	1
2014-06-10	Afternoon	confined - pheromone allowed	confined	allowed	5	yellow541800	yellow	L	2	LR		1	1	food	1	1	nest	2	0
2014-06-10	Afternoon	confined - pheromone allowed	confined	allowed	5	yellow541800	yellow	L	3	LR		1	1	food	2	0	nest	2
2014-06-10	Afternoon	confined - pheromone allowed	confined	allowed	5	yellow541800	yellow	L	4	LR		1	1	food	2		nest
2014-06-10	Afternoon	confined - pheromone allowed	confined	allowed	5	yellow541800	yellow	L	5	LR		1	1	food			nest
2014-06-10	Afternoon	confined - pheromone allowed	confined	allowed	5	yellow541800	yellow	L	6	LR		1	1	food	1	0	nest	1	0
2014-06-10	Afternoon	confined - pheromone allowed	confined	allowed	5	yellow541800	yellow	L	7	LL		1	0	food			nest
2014-06-10	Afternoon	confined - pheromone allowed	confined	allowed	5	green541800	green	L	0	LR				food			nest	2
2014-06-10	Afternoon	confined - pheromone allowed	confined	allowed	5	green541800	green	L	1	LR		1	1	food	0	0	nest	0	0
2014-06-10	Afternoon	confined - pheromone allowed	confined	allowed	5	green541800	green	L	2	LR		1	1	food	1	0	nest	0	0
2014-06-10	Afternoon	confined - pheromone allowed	confined	allowed	5	green541800	green	L	3	LR		1	1	food	0	0	nest	0	0
2014-06-10	Afternoon	confined - pheromone allowed	confined	allowed	5	green541800	green	L	4	LR		1	1	food	0	0	nest
2014-06-10	Afternoon	confined - pheromone allowed	confined	allowed	5	green541800	green	L	5	LR		1	1	food	0	0	nest	0	0
2014-06-10	Afternoon	confined - pheromone allowed	confined	allowed	5	green541800	green	L	6	LR		1	1	food	0	0	nest	0	0
2014-06-10	Afternoon	confined - pheromone allowed	confined	allowed	5	green541800	green	L	7	LR		1	1	food	0	0	nest
2014-06-10	Afternoon	confined - pheromone allowed	confined	allowed	5	red541800	red	L	0					food			nest	1
2014-06-10	Afternoon	confined - pheromone allowed	confined	allowed	5	red541800	red	L	1	LR		1	1	food	5		nest	2	5
2014-06-10	Afternoon	confined - pheromone allowed	confined	allowed	5	red541800	red	L	2	LR		1	1	food	3	3	nest	2	2
2014-06-10	Afternoon	confined - pheromone allowed	confined	allowed	5	red541800	red	L	3	LR		1	1	food		2	nest	0	0
2014-06-10	Afternoon	confined - pheromone allowed	confined	allowed	5	red541800	red	L	4	LR		1	1	food	1	1	nest		0
2014-06-10	Afternoon	confined - pheromone allowed	confined	allowed	5	red541800	red	L	5	LR		1	1	food	2	3	nest	0	0
2014-06-10	Afternoon	confined - pheromone allowed	confined	allowed	5	red541800	red	L	6	LR		1	1	food	2	3	nest	0	0
2014-06-10	Afternoon	confined - pheromone allowed	confined	allowed	5	red541800	red	L	7	LR		1	1	food	2	0	nest
2014-06-10	Afternoon	confined - pheromone allowed	confined	allowed	5	orange541800	orange	L	0	LR				food			nest
2014-06-10	Afternoon	confined - pheromone allowed	confined	allowed	5	orange541800	orange	L	1	LR		1	1	food	0	0	nest	0
2014-06-10	Afternoon	confined - pheromone allowed	confined	allowed	5	orange541800	orange	L	2	LR		1	1	food	0	1	nest	2	1
2014-06-10	Afternoon	confined - pheromone allowed	confined	allowed	5	orange541800	orange	L	3	LR		1	1	food		0	nest	2	0
2014-06-10	Afternoon	confined - pheromone allowed	confined	allowed	5	orange541800	orange	L	4	LR		1	1	food	0	1	nest	2	0
2014-06-10	Afternoon	confined - pheromone allowed	confined	allowed	5	orange541800	orange	L	5	LR		1	1	food	0	2	nest	1	2
2014-06-10	Afternoon	confined - pheromone allowed	confined	allowed	5	orange541800	orange	L	6	LR		1	1	food	0	1	nest	0	0
2014-06-10	Afternoon	confined - pheromone allowed	confined	allowed	5	orange541800	orange	L	7	RL		0	0	food	0	0	nest
2014-06-11	Morning	confined - pheromone allowed	confined	allowed	6	blue641801	blue	L	0					food			nest	0
2014-06-11	Morning	confined - pheromone allowed	confined	allowed	6	blue641801	blue	L	1	LR		1	1	food	2	0	nest	1
2014-06-11	Morning	confined - pheromone allowed	confined	allowed	6	blue641801	blue	L	2	LR		1	1	food	0	0	nest	2	1
2014-06-11	Morning	confined - pheromone allowed	confined	allowed	6	blue641801	blue	L	3	LR		1	1	food	0	0	nest	2
2014-06-11	Morning	confined - pheromone allowed	confined	allowed	6	blue641801	blue	L	4	LR		1	1	food	1	0	nest		2
2014-06-11	Morning	confined - pheromone allowed	confined	allowed	6	blue641801	blue	L	5	LR		1	1	food	0	0	nest	0	0
2014-06-11	Morning	confined - pheromone allowed	confined	allowed	6	blue641801	blue	L	6	LR		1	1	food	0	0	nest	0	1
2014-06-11	Morning	confined - pheromone allowed	confined	allowed	6	blue641801	blue	L	7	LL		1	0	food	0	0	nest
2014-06-11	Morning	confined - pheromone allowed	confined	allowed	6	yellow641801	yellow	L	0					food			nest	0	3
2014-06-11	Morning	confined - pheromone allowed	confined	allowed	6	yellow641801	yellow	L	1	LR		1	1	food	2	1	nest	2	4
2014-06-11	Morning	confined - pheromone allowed	confined	allowed	6	yellow641801	yellow	L	2	LR		1	1	food	3		nest	0	0
2014-06-11	Morning	confined - pheromone allowed	confined	allowed	6	yellow641801	yellow	L	3	LR		1	1	food	4	5	nest	0
2014-06-11	Morning	confined - pheromone allowed	confined	allowed	6	yellow641801	yellow	L	4	LR		1	1	food	3	2	nest	0	3
2014-06-11	Morning	confined - pheromone allowed	confined	allowed	6	yellow641801	yellow	L	5	LR		1	1	food	2	2	nest	0	1
2014-06-11	Morning	confined - pheromone allowed	confined	allowed	6	yellow641801	yellow	L	6	LR		1	1	food	0	0	nest	0	0
2014-06-11	Morning	confined - pheromone allowed	confined	allowed	6	yellow641801	yellow	L	7	RR		0	1	food	0	1	nest
2014-06-11	Morning	confined - pheromone allowed	confined	allowed	6	green641801	green	L	0	LR				food			nest
2014-06-11	Morning	confined - pheromone allowed	confined	allowed	6	green641801	green	L	1	LR		1	1	food			nest
2014-06-11	Morning	confined - pheromone allowed	confined	allowed	6	green641801	green	L	2	LR		1	1	food	0	0	nest	2	3
2014-06-11	Morning	confined - pheromone allowed	confined	allowed	6	green641801	green	L	3	LR		1	1	food	3	1	nest	1
2014-06-11	Morning	confined - pheromone allowed	confined	allowed	6	green641801	green	L	4	LR		1	1	food	1	1	nest	1	1
2014-06-11	Morning	confined - pheromone allowed	confined	allowed	6	green641801	green	L	5	LR		1	1	food	2	0	nest	0	1
2014-06-11	Morning	confined - pheromone allowed	confined	allowed	6	green641801	green	L	6	LR		1	1	food	0	0	nest	1	1
2014-06-11	Morning	confined - pheromone allowed	confined	allowed	6	green641801	green	L	7	LR		1	1	food	0	0	nest
2014-06-11	Morning	confined - pheromone allowed	confined	allowed	6	red641801	red	L	0					food			nest
2014-06-11	Morning	confined - pheromone allowed	confined	allowed	6	red641801	red	L	1	LR		1	1	food	2	0	nest	1	3
2014-06-11	Morning	confined - pheromone allowed	confined	allowed	6	red641801	red	L	2	LR		1	1	food	2	2	nest	2	3
2014-06-11	Morning	confined - pheromone allowed	confined	allowed	6	red641801	red	L	3	LR		1	1	food	2	2	nest	1	1
2014-06-11	Morning	confined - pheromone allowed	confined	allowed	6	red641801	red	L	4	LR		1	1	food	2	1	nest	0	1
2014-06-11	Morning	confined - pheromone allowed	confined	allowed	6	red641801	red	L	5	LR		1	1	food	1	1	nest	1	1
2014-06-11	Morning	confined - pheromone allowed	confined	allowed	6	red641801	red	L	6	LR		1	1	food	1	0	nest	1	1
2014-06-11	Morning	confined - pheromone allowed	confined	allowed	6	red641801	red	L	7	RR		0	1	food	0	0	nest
2014-06-11	Morning	confined - pheromone allowed	confined	allowed	6	orange641801	orange	L	0	LR				food			nest		0
2014-06-11	Morning	confined - pheromone allowed	confined	allowed	6	orange641801	orange	L	1	LR		1	1	food	0	0	nest	0
2014-06-11	Morning	confined - pheromone allowed	confined	allowed	6	orange641801	orange	L	2	LR		1	1	food	0	0	nest		1
2014-06-11	Morning	confined - pheromone allowed	confined	allowed	6	orange641801	orange	L	3	LR		1	1	food			nest
2014-06-11	Morning	confined - pheromone allowed	confined	allowed	6	orange641801	orange	L	4	LR		1	1	food	1	0	nest
2014-06-11	Morning	confined - pheromone allowed	confined	allowed	6	orange641801	orange	L	5	LR		1	1	food	0	0	nest	0	0
2014-06-11	Morning	confined - pheromone allowed	confined	allowed	6	orange641801	orange	L	6	LR		1	1	food		0	nest	0	0
2014-06-11	Morning	confined - pheromone allowed	confined	allowed	6	orange641801	orange	L	7	RL		0	0	food	0	0	nest
2014-06-11	Afternoon	confined - pheromone allowed	confined	allowed	6	blue641801	blue	R	0					food			nest	0	1
2014-06-11	Afternoon	confined - pheromone allowed	confined	allowed	6	blue641801	blue	R	1	RL		1	1	food	0	0	nest	0	0
2014-06-11	Afternoon	confined - pheromone allowed	confined	allowed	6	blue641801	blue	R	2	RL		1	1	food	1	1	nest	0	1
2014-06-11	Afternoon	confined - pheromone allowed	confined	allowed	6	blue641801	blue	R	3	RL		1	1	food	0	1	nest	1	0
2014-06-11	Afternoon	confined - pheromone allowed	confined	allowed	6	blue641801	blue	R	4	RL		1	1	food	1	1	nest	2	2
2014-06-11	Afternoon	confined - pheromone allowed	confined	allowed	6	blue641801	blue	R	5	RL		1	1	food	2	1	nest	0	1
2014-06-11	Afternoon	confined - pheromone allowed	confined	allowed	6	blue641801	blue	R	6	RL		1	1	food	1	2	nest	0	0
2014-06-11	Afternoon	confined - pheromone allowed	confined	allowed	6	blue641801	blue	R	7	LR		0	0	food	0	0	nest
2014-06-11	Afternoon	confined - pheromone allowed	confined	allowed	6	yellow641801	yellow	R	0					food			nest		1
2014-06-11	Afternoon	confined - pheromone allowed	confined	allowed	6	yellow641801	yellow	R	1	RL		1	1	food	0	0	nest	1	0
2014-06-11	Afternoon	confined - pheromone allowed	confined	allowed	6	yellow641801	yellow	R	2	RL		1	1	food	1	1	nest	1	2
2014-06-11	Afternoon	confined - pheromone allowed	confined	allowed	6	yellow641801	yellow	R	3	RL		1	1	food	0	0	nest	0	0
2014-06-11	Afternoon	confined - pheromone allowed	confined	allowed	6	yellow641801	yellow	R	4	RL		1	1	food	0	0	nest
2014-06-11	Afternoon	confined - pheromone allowed	confined	allowed	6	yellow641801	yellow	R	5	RL		1	1	food	0	0	nest	0	0
2014-06-11	Afternoon	confined - pheromone allowed	confined	allowed	6	yellow641801	yellow	R	6	RL		1	1	food	2	1	nest	1	0
2014-06-11	Afternoon	confined - pheromone allowed	confined	allowed	6	yellow641801	yellow	R	7	LR		0	0	food	0	0	nest
2014-06-11	Afternoon	confined - pheromone allowed	confined	allowed	6	green641801	green	R	0					food			nest	1	4
2014-06-11	Afternoon	confined - pheromone allowed	confined	allowed	6	green641801	green	R	1	RL		1	1	food	1	0	nest	0	2
2014-06-11	Afternoon	confined - pheromone allowed	confined	allowed	6	green641801	green	R	2	RL		1	1	food	0	0	nest	0	0
2014-06-11	Afternoon	confined - pheromone allowed	confined	allowed	6	green641801	green	R	3	RL		1	1	food	1	0	nest	1	1
2014-06-11	Afternoon	confined - pheromone allowed	confined	allowed	6	green641801	green	R	4	RL		1	1	food	1	0	nest	0	0
2014-06-11	Afternoon	confined - pheromone allowed	confined	allowed	6	green641801	green	R	5	RL		1	1	food	1	0	nest	2	1
2014-06-11	Afternoon	confined - pheromone allowed	confined	allowed	6	green641801	green	R	6	RL		1	1	food		0	nest
2014-06-11	Afternoon	confined - pheromone allowed	confined	allowed	6	green641801	green	R	7	RL		1	1	food	0	0	nest
2014-06-11	Afternoon	confined - pheromone allowed	confined	allowed	6	red641801	red	R	0					food			nest
2014-06-11	Afternoon	confined - pheromone allowed	confined	allowed	6	red641801	red	R	1	RL		1	1	food	0	3	nest	4	2
2014-06-11	Afternoon	confined - pheromone allowed	confined	allowed	6	red641801	red	R	2	RL		1	1	food	2	2	nest	1	3
2014-06-11	Afternoon	confined - pheromone allowed	confined	allowed	6	red641801	red	R	3	RL		1	1	food	2	2	nest	0
2014-06-11	Afternoon	confined - pheromone allowed	confined	allowed	6	red641801	red	R	4	RL		1	1	food	1	1	nest
2014-06-11	Afternoon	confined - pheromone allowed	confined	allowed	6	red641801	red	R	5	RL		1	1	food	0	0	nest	2	0
2014-06-11	Afternoon	confined - pheromone allowed	confined	allowed	6	red641801	red	R	6	RL		1	1	food	0	0	nest	1	0
2014-06-11	Afternoon	confined - pheromone allowed	confined	allowed	6	red641801	red	R	7	L*L	1	0	1	food	0	0	nest
2014-06-11	Afternoon	confined - pheromone allowed	confined	allowed	6	orange641801	orange	R	0					food			nest	4	5
2014-06-11	Afternoon	confined - pheromone allowed	confined	allowed	6	orange641801	orange	R	1	RL		1	1	food	1	1	nest	0	2
2014-06-11	Afternoon	confined - pheromone allowed	confined	allowed	6	orange641801	orange	R	2	RL		1	1	food	0	1	nest	1	1
2014-06-11	Afternoon	confined - pheromone allowed	confined	allowed	6	orange641801	orange	R	3	RL		1	1	food	0	0	nest	0	0
2014-06-11	Afternoon	confined - pheromone allowed	confined	allowed	6	orange641801	orange	R	4	RL		1	1	food	0	0	nest	0	0
2014-06-11	Afternoon	confined - pheromone allowed	confined	allowed	6	orange641801	orange	R	5	RL		1	1	food	0	0	nest	1	1
2014-06-11	Afternoon	confined - pheromone allowed	confined	allowed	6	orange641801	orange	R	6					food			nest
2014-06-11	Afternoon	confined - pheromone allowed	confined	allowed	6	orange641801	orange	R	7					food			nest
2014-06-12	Morning	confined - pheromone allowed	confined	allowed	12	blue1241802	blue	R	0					food			nest
2014-06-12	Morning	confined - pheromone allowed	confined	allowed	12	blue1241802	blue	R	1	RL		1	1	food	0	0	nest	2	1
2014-06-12	Morning	confined - pheromone allowed	confined	allowed	12	blue1241802	blue	R	2	RL		1	1	food	2	3	nest	3
2014-06-12	Morning	confined - pheromone allowed	confined	allowed	12	blue1241802	blue	R	3	RL		1	1	food	0	0	nest	0	0
2014-06-12	Morning	confined - pheromone allowed	confined	allowed	12	blue1241802	blue	R	4	RL		1	1	food	0	1	nest	0	0
2014-06-12	Morning	confined - pheromone allowed	confined	allowed	12	blue1241802	blue	R	5	RL		1	1	food	0	1	nest	0	1
2014-06-12	Morning	confined - pheromone allowed	confined	allowed	12	blue1241802	blue	R	6	RL		1	1	food	1	2	nest	1	1
2014-06-12	Morning	confined - pheromone allowed	confined	allowed	12	blue1241802	blue	R	7	LR		0	0	food	1	0	nest
2014-06-12	Morning	confined - pheromone allowed	confined	allowed	12	yellow1241802	yellow	R	0					food			nest	2
2014-06-12	Morning	confined - pheromone allowed	confined	allowed	12	yellow1241802	yellow	R	1	RL		1	1	food	0	0	nest	2	2
2014-06-12	Morning	confined - pheromone allowed	confined	allowed	12	yellow1241802	yellow	R	2	RL		1	1	food	3	2	nest	2	1
2014-06-12	Morning	confined - pheromone allowed	confined	allowed	12	yellow1241802	yellow	R	3	RL		1	1	food	0	1	nest
2014-06-12	Morning	confined - pheromone allowed	confined	allowed	12	yellow1241802	yellow	R	4	RL		1	1	food	2	2	nest	2	2
2014-06-12	Morning	confined - pheromone allowed	confined	allowed	12	yellow1241802	yellow	R	5	RL		1	1	food			nest	1	0
2014-06-12	Morning	confined - pheromone allowed	confined	allowed	12	yellow1241802	yellow	R	6	RL		1	1	food	1	1	nest	1	2
2014-06-12	Morning	confined - pheromone allowed	confined	allowed	12	yellow1241802	yellow	R	7	LL		0	1	food	0	0	nest
2014-06-12	Morning	confined - pheromone allowed	confined	allowed	12	green1241802	green	R	0					food			nest
2014-06-12	Morning	confined - pheromone allowed	confined	allowed	12	green1241802	green	R	1	RL		1	1	food	0	0	nest	0	0
2014-06-12	Morning	confined - pheromone allowed	confined	allowed	12	green1241802	green	R	2	RL		1	1	food	2	3	nest	0	0
2014-06-12	Morning	confined - pheromone allowed	confined	allowed	12	green1241802	green	R	3	RL		1	1	food	0	0	nest	0	0
2014-06-12	Morning	confined - pheromone allowed	confined	allowed	12	green1241802	green	R	4	RL		1	1	food	0	0	nest	0	0
2014-06-12	Morning	confined - pheromone allowed	confined	allowed	12	green1241802	green	R	5					food			nest
2014-06-12	Morning	confined - pheromone allowed	confined	allowed	12	green1241802	green	R	6					food			nest
2014-06-12	Morning	confined - pheromone allowed	confined	allowed	12	green1241802	green	R	7					food			nest
2014-06-12	Morning	confined - pheromone allowed	confined	allowed	12	red1241802	red	R	0					food			nest	0	0
2014-06-12	Morning	confined - pheromone allowed	confined	allowed	12	red1241802	red	R	1	RL		1	1	food		0	nest	0	0
2014-06-12	Morning	confined - pheromone allowed	confined	allowed	12	red1241802	red	R	2	RL		1	1	food	1	0	nest	0
2014-06-12	Morning	confined - pheromone allowed	confined	allowed	12	red1241802	red	R	3	RL		1	1	food		0	nest	0
2014-06-12	Morning	confined - pheromone allowed	confined	allowed	12	red1241802	red	R	4	RL		1	1	food	0	2	nest	0	0
2014-06-12	Morning	confined - pheromone allowed	confined	allowed	12	red1241802	red	R	5	RL		1	1	food			nest	1	0
2014-06-12	Morning	confined - pheromone allowed	confined	allowed	12	red1241802	red	R	6	RL		1	1	food	0	0	nest	1	0
2014-06-12	Morning	confined - pheromone allowed	confined	allowed	12	red1241802	red	R	7	RL		1	1	food	1	0	nest
2014-06-12	Morning	confined - pheromone allowed	confined	allowed	12	orange1241802	orange	R	0					food			nest	0	2
2014-06-12	Morning	confined - pheromone allowed	confined	allowed	12	orange1241802	orange	R	1	RL		1	1	food	0	0	nest	0
2014-06-12	Morning	confined - pheromone allowed	confined	allowed	12	orange1241802	orange	R	2	RL		1	1	food	0	0	nest	1	1
2014-06-12	Morning	confined - pheromone allowed	confined	allowed	12	orange1241802	orange	R	3	RL		1	1	food	2	1	nest	2	3
2014-06-12	Morning	confined - pheromone allowed	confined	allowed	12	orange1241802	orange	R	4	RL		1	1	food	1	1	nest	1	1
2014-06-12	Morning	confined - pheromone allowed	confined	allowed	12	orange1241802	orange	R	5	RL		1	1	food	3	1	nest	2	2
2014-06-12	Morning	confined - pheromone allowed	confined	allowed	12	orange1241802	orange	R	6	RL		1	1	food	1	1	nest	1	2
2014-06-12	Morning	confined - pheromone allowed	confined	allowed	12	orange1241802	orange	R	7	LL		0	1	food	0	0	nest
2014-06-12	Morning	confined - pheromone removed	confined	removed	11	blue1141802	blue	R	0					food			nest	0	3
2014-06-12	Morning	confined - pheromone removed	confined	removed	11	blue1141802	blue	R	1	RL		1	1	food	0	0	nest	0
2014-06-12	Morning	confined - pheromone removed	confined	removed	11	blue1141802	blue	R	2	RL		1	1	food	0	0	nest	0	0
2014-06-12	Morning	confined - pheromone removed	confined	removed	11	blue1141802	blue	R	3	RL		1	1	food			nest	0	0
2014-06-12	Morning	confined - pheromone removed	confined	removed	11	blue1141802	blue	R	4	RL		1	1	food	0	1	nest	0	0
2014-06-12	Morning	confined - pheromone removed	confined	removed	11	blue1141802	blue	R	5	RL		1	1	food		0	nest	0	0
2014-06-12	Morning	confined - pheromone removed	confined	removed	11	blue1141802	blue	R	6	RL		1	1	food	0	0	nest	0	0
2014-06-12	Morning	confined - pheromone removed	confined	removed	11	blue1141802	blue	R	7	LL		0	1	food	0	0	nest
2014-06-12	Morning	confined - pheromone removed	confined	removed	11	yellow1141802	yellow	R	0					food			nest	0
2014-06-12	Morning	confined - pheromone removed	confined	removed	11	yellow1141802	yellow	R	1	RL		1	1	food	0	0	nest
2014-06-12	Morning	confined - pheromone removed	confined	removed	11	yellow1141802	yellow	R	2	RL		1	1	food	1		nest	0	0
2014-06-12	Morning	confined - pheromone removed	confined	removed	11	yellow1141802	yellow	R	3	RL		1	1	food			nest	1	2
2014-06-12	Morning	confined - pheromone removed	confined	removed	11	yellow1141802	yellow	R	4	RL		1	1	food	1	0	nest	2	3
2014-06-12	Morning	confined - pheromone removed	confined	removed	11	yellow1141802	yellow	R	5	RL		1	1	food	1	0	nest	1
2014-06-12	Morning	confined - pheromone removed	confined	removed	11	yellow1141802	yellow	R	6	RL		1	1	food	0	3	nest	1	3
2014-06-12	Morning	confined - pheromone removed	confined	removed	11	yellow1141802	yellow	R	7	LL		0	1	food	2	1	nest
2014-06-12	Morning	confined - pheromone removed	confined	removed	11	green1141802	green	R	0					food			nest
2014-06-12	Morning	confined - pheromone removed	confined	removed	11	green1141802	green	R	1	RL		1	1	food	0	0	nest	2	2
2014-06-12	Morning	confined - pheromone removed	confined	removed	11	green1141802	green	R	2	RL		1	1	food	1	0	nest	3	4
2014-06-12	Morning	confined - pheromone removed	confined	removed	11	green1141802	green	R	3	RL		1	1	food	0	0	nest	2	3
2014-06-12	Morning	confined - pheromone removed	confined	removed	11	green1141802	green	R	4	RL		1	1	food	0	0	nest	0	4
2014-06-12	Morning	confined - pheromone removed	confined	removed	11	green1141802	green	R	5	RL		1	1	food	0	0	nest	1	3
2014-06-12	Morning	confined - pheromone removed	confined	removed	11	green1141802	green	R	6	RL		1	1	food	2	1	nest	0	1
2014-06-12	Morning	confined - pheromone removed	confined	removed	11	green1141802	green	R	7	LL		0	1	food	0	0	nest
2014-06-12	Morning	confined - pheromone removed	confined	removed	11	red1141802	red	R	0					food			nest		8
2014-06-12	Morning	confined - pheromone removed	confined	removed	11	red1141802	red	R	1	RL		1	1	food	0	0	nest
2014-06-12	Morning	confined - pheromone removed	confined	removed	11	red1141802	red	R	2	RL		1	1	food			nest	4	3
2014-06-12	Morning	confined - pheromone removed	confined	removed	11	red1141802	red	R	3	RL		1	1	food	0	0	nest	0	0
2014-06-12	Morning	confined - pheromone removed	confined	removed	11	red1141802	red	R	4	RL		1	1	food	0	0	nest	0	0
2014-06-12	Morning	confined - pheromone removed	confined	removed	11	red1141802	red	R	5	RL		1	1	food	0	0	nest
2014-06-12	Morning	confined - pheromone removed	confined	removed	11	red1141802	red	R	6					food			nest
2014-06-12	Morning	confined - pheromone removed	confined	removed	11	red1141802	red	R	7					food			nest
2014-06-12	Morning	confined - pheromone removed	confined	removed	11	orange1141802	orange	R	0					food			nest	0	0
2014-06-12	Morning	confined - pheromone removed	confined	removed	11	orange1141802	orange	R	1	RL		1	1	food	4		nest	2	3
2014-06-12	Morning	confined - pheromone removed	confined	removed	11	orange1141802	orange	R	2	RL		1	1	food	0	1	nest	3
2014-06-12	Morning	confined - pheromone removed	confined	removed	11	orange1141802	orange	R	3	RL		1	1	food	1	0	nest	2	0
2014-06-12	Morning	confined - pheromone removed	confined	removed	11	orange1141802	orange	R	4	RL		1	1	food	0	0	nest	2	2
2014-06-12	Morning	confined - pheromone removed	confined	removed	11	orange1141802	orange	R	5	RL		1	1	food	0	0	nest	3	4
2014-06-12	Morning	confined - pheromone removed	confined	removed	11	orange1141802	orange	R	6	RL		1	1	food	0	3	nest	4	4
2014-06-12	Morning	confined - pheromone removed	confined	removed	11	orange1141802	orange	R	7	LL		0	1	food		2	nest
2014-06-18	Morning	confined - pheromone allowed	confined	allowed	RGB8	blueRGB841808	blue	R	0					food			nest
2014-06-18	Morning	confined - pheromone allowed	confined	allowed	RGB8	blueRGB841808	blue	R	1	RL		1	1	food			nest	0	0
2014-06-18	Morning	confined - pheromone allowed	confined	allowed	RGB8	blueRGB841808	blue	R	2	RL		1	1	food			nest		3
2014-06-18	Morning	confined - pheromone allowed	confined	allowed	RGB8	blueRGB841808	blue	R	3	RL		1	1	food		0	nest	0
2014-06-18	Morning	confined - pheromone allowed	confined	allowed	RGB8	blueRGB841808	blue	R	4	RL		1	1	food	0	0	nest	0	1
2014-06-18	Morning	confined - pheromone allowed	confined	allowed	RGB8	blueRGB841808	blue	R	5	RL		1	1	food			nest	1	2
2014-06-18	Morning	confined - pheromone allowed	confined	allowed	RGB8	blueRGB841808	blue	R	6	RL		1	1	food	1	1	nest	1	3
2014-06-18	Morning	confined - pheromone allowed	confined	allowed	RGB8	blueRGB841808	blue	R	7	R*L	1	1	1	food	0	0	nest
2014-06-18	Morning	confined - pheromone allowed	confined	allowed	RGB8	yellowRGB841808	yellow	R	0					food			nest	0	0
2014-06-18	Morning	confined - pheromone allowed	confined	allowed	RGB8	yellowRGB841808	yellow	R	1	RL		1	1	food	0	0	nest
2014-06-18	Morning	confined - pheromone allowed	confined	allowed	RGB8	yellowRGB841808	yellow	R	2	RL		1	1	food	2	0	nest
2014-06-18	Morning	confined - pheromone allowed	confined	allowed	RGB8	yellowRGB841808	yellow	R	3	RL		1	1	food	0	0	nest	0
2014-06-18	Morning	confined - pheromone allowed	confined	allowed	RGB8	yellowRGB841808	yellow	R	4	RL		1	1	food	1	0	nest
2014-06-18	Morning	confined - pheromone allowed	confined	allowed	RGB8	yellowRGB841808	yellow	R	5	RL		1	1	food	2	0	nest		1
2014-06-18	Morning	confined - pheromone allowed	confined	allowed	RGB8	yellowRGB841808	yellow	R	6					food			nest
2014-06-18	Morning	confined - pheromone allowed	confined	allowed	RGB8	yellowRGB841808	yellow	R	7					food			nest
2014-06-18	Morning	confined - pheromone allowed	confined	allowed	RGB8	greenRGB841808	green	R	0					food			nest
2014-06-18	Morning	confined - pheromone allowed	confined	allowed	RGB8	greenRGB841808	green	R	1	RL		1	1	food	4	1	nest	1
2014-06-18	Morning	confined - pheromone allowed	confined	allowed	RGB8	greenRGB841808	green	R	2	RL		1	1	food		1	nest		4
2014-06-18	Morning	confined - pheromone allowed	confined	allowed	RGB8	greenRGB841808	green	R	3	RL		1	1	food		1	nest	0
2014-06-18	Morning	confined - pheromone allowed	confined	allowed	RGB8	greenRGB841808	green	R	4	RL		1	1	food			nest		0
2014-06-18	Morning	confined - pheromone allowed	confined	allowed	RGB8	greenRGB841808	green	R	5	RL		1	1	food	0	0	nest	0	0
2014-06-18	Morning	confined - pheromone allowed	confined	allowed	RGB8	greenRGB841808	green	R	6	RL		1	1	food	0	1	nest	0	0
2014-06-18	Morning	confined - pheromone allowed	confined	allowed	RGB8	greenRGB841808	green	R	7	RL		1	1	food	3	2	nest
2014-06-18	Morning	confined - pheromone allowed	confined	allowed	RGB8	redRGB841808	red	R	0					food			nest	0
2014-06-18	Morning	confined - pheromone allowed	confined	allowed	RGB8	redRGB841808	red	R	1	RL		1	1	food	0	0	nest	0	0
2014-06-18	Morning	confined - pheromone allowed	confined	allowed	RGB8	redRGB841808	red	R	2	RL		1	1	food	0	0	nest	0	3
2014-06-18	Morning	confined - pheromone allowed	confined	allowed	RGB8	redRGB841808	red	R	3	RL		1	1	food		0	nest	0	1
2014-06-18	Morning	confined - pheromone allowed	confined	allowed	RGB8	redRGB841808	red	R	4	RL		1	1	food	0		nest
2014-06-18	Morning	confined - pheromone allowed	confined	allowed	RGB8	redRGB841808	red	R	5	RL		1	1	food		0	nest	0	2
2014-06-18	Morning	confined - pheromone allowed	confined	allowed	RGB8	redRGB841808	red	R	6	RL		1	1	food	0	0	nest	0	0
2014-06-18	Morning	confined - pheromone allowed	confined	allowed	RGB8	redRGB841808	red	R	7	RL		1	1	food	0	0	nest
2014-06-18	Morning	confined - pheromone allowed	confined	allowed	RGB8	orangeRGB841808	orange	R	0					food			nest
2014-06-18	Morning	confined - pheromone allowed	confined	allowed	RGB8	orangeRGB841808	orange	R	1	RL		1	1	food	4	4	nest	1
2014-06-18	Morning	confined - pheromone allowed	confined	allowed	RGB8	orangeRGB841808	orange	R	2	RL		1	1	food	3	0	nest	0	1
2014-06-18	Morning	confined - pheromone allowed	confined	allowed	RGB8	orangeRGB841808	orange	R	3	RL		1	1	food	0		nest	0	0
2014-06-18	Morning	confined - pheromone allowed	confined	allowed	RGB8	orangeRGB841808	orange	R	4	RL		1	1	food		0	nest	0	0
2014-06-18	Morning	confined - pheromone allowed	confined	allowed	RGB8	orangeRGB841808	orange	R	5	RL		1	1	food	0	1	nest	0	0
2014-06-18	Morning	confined - pheromone allowed	confined	allowed	RGB8	orangeRGB841808	orange	R	6	RL		1	1	food	0	0	nest	0	1
2014-06-18	Morning	confined - pheromone allowed	confined	allowed	RGB8	orangeRGB841808	orange	R	7	LL		0	1	food	0	0	nest
2014-06-18	Morning	confined - pheromone allowed	confined	allowed	888split	blue888split41808	blue	R	0					food			nest
2014-06-18	Morning	confined - pheromone allowed	confined	allowed	888split	blue888split41808	blue	R	1	RL		1	1	food	0	1	nest	0
2014-06-18	Morning	confined - pheromone allowed	confined	allowed	888split	blue888split41808	blue	R	2	RL		1	1	food		0	nest	0
2014-06-18	Morning	confined - pheromone allowed	confined	allowed	888split	blue888split41808	blue	R	3	RL		1	1	food		2	nest	4	3
2014-06-18	Morning	confined - pheromone allowed	confined	allowed	888split	blue888split41808	blue	R	4	RL		1	1	food	1	0	nest	1	1
2014-06-18	Morning	confined - pheromone allowed	confined	allowed	888split	blue888split41808	blue	R	5	RL		1	1	food	2	1	nest	1	1
2014-06-18	Morning	confined - pheromone allowed	confined	allowed	888split	blue888split41808	blue	R	6	RL		1	1	food	0	0	nest	0	0
2014-06-18	Morning	confined - pheromone allowed	confined	allowed	888split	blue888split41808	blue	R	7	RR		1	0	food	0	0	nest
2014-06-18	Morning	confined - pheromone allowed	confined	allowed	888split	yellow888split41808	yellow	R	0					food			nest	0
2014-06-18	Morning	confined - pheromone allowed	confined	allowed	888split	yellow888split41808	yellow	R	1	RL		1	1	food	1	0	nest	1	2
2014-06-18	Morning	confined - pheromone allowed	confined	allowed	888split	yellow888split41808	yellow	R	2	RL		1	1	food		3	nest	0
2014-06-18	Morning	confined - pheromone allowed	confined	allowed	888split	yellow888split41808	yellow	R	3	RL		1	1	food	0	0	nest	1	0
2014-06-18	Morning	confined - pheromone allowed	confined	allowed	888split	yellow888split41808	yellow	R	4	RL		1	1	food	1	1	nest	1	1
2014-06-18	Morning	confined - pheromone allowed	confined	allowed	888split	yellow888split41808	yellow	R	5	RL		1	1	food	0	0	nest	0	0
2014-06-18	Morning	confined - pheromone allowed	confined	allowed	888split	yellow888split41808	yellow	R	6	RL		1	1	food	2	1	nest	0	1
2014-06-18	Morning	confined - pheromone allowed	confined	allowed	888split	yellow888split41808	yellow	R	7	R*L	1	1	1	food	0	0	nest
2014-06-18	Morning	confined - pheromone allowed	confined	allowed	888split	green888split41808	green	R	0					food			nest
2014-06-18	Morning	confined - pheromone allowed	confined	allowed	888split	green888split41808	green	R	1	RL		1	1	food	1	1	nest	2	3
2014-06-18	Morning	confined - pheromone allowed	confined	allowed	888split	green888split41808	green	R	2	RL		1	1	food	3	0	nest	0	2
2014-06-18	Morning	confined - pheromone allowed	confined	allowed	888split	green888split41808	green	R	3	RL		1	1	food		0	nest	0	0
2014-06-18	Morning	confined - pheromone allowed	confined	allowed	888split	green888split41808	green	R	4	RL		1	1	food	0	0	nest	4	0
2014-06-18	Morning	confined - pheromone allowed	confined	allowed	888split	green888split41808	green	R	5	RL		1	1	food	0	0	nest	0
2014-06-18	Morning	confined - pheromone allowed	confined	allowed	888split	green888split41808	green	R	6	RL		1	1	food	0	0	nest	0	2
2014-06-18	Morning	confined - pheromone allowed	confined	allowed	888split	green888split41808	green	R	7	LL		0	1	food	0	0	nest
2014-06-18	Morning	confined - pheromone allowed	confined	allowed	888split	red888split41808	red	R	0					food			nest
2014-06-18	Morning	confined - pheromone allowed	confined	allowed	888split	red888split41808	red	R	1	RL		1	1	food	2	0	nest	0	3
2014-06-18	Morning	confined - pheromone allowed	confined	allowed	888split	red888split41808	red	R	2	RL		1	1	food	0	0	nest	0	0
2014-06-18	Morning	confined - pheromone allowed	confined	allowed	888split	red888split41808	red	R	3	RL		1	1	food			nest	0	0
2014-06-18	Morning	confined - pheromone allowed	confined	allowed	888split	red888split41808	red	R	4	RL		1	1	food	0	0	nest	0	0
2014-06-18	Morning	confined - pheromone allowed	confined	allowed	888split	red888split41808	red	R	5	RL		1	1	food	0	0	nest	0	0
2014-06-18	Morning	confined - pheromone allowed	confined	allowed	888split	red888split41808	red	R	6	RL		1	1	food	0	0	nest	1	0
2014-06-18	Morning	confined - pheromone allowed	confined	allowed	888split	red888split41808	red	R	7	RL		1	1	food	0	0	nest
2014-06-18	Morning	confined - pheromone allowed	confined	allowed	888split	orange888split41808	orange	R	0					food			nest	0
2014-06-18	Morning	confined - pheromone allowed	confined	allowed	888split	orange888split41808	orange	R	1	RL		1	1	food	1	0	nest
2014-06-18	Morning	confined - pheromone allowed	confined	allowed	888split	orange888split41808	orange	R	2	RL		1	1	food	3	2	nest	0	3
2014-06-18	Morning	confined - pheromone allowed	confined	allowed	888split	orange888split41808	orange	R	3	RL		1	1	food			nest	1	3
2014-06-18	Morning	confined - pheromone allowed	confined	allowed	888split	orange888split41808	orange	R	4	RL		1	1	food	3	1	nest	1	0
2014-06-18	Morning	confined - pheromone allowed	confined	allowed	888split	orange888split41808	orange	R	5	RL		1	1	food	2	1	nest	0	0
2014-06-18	Morning	confined - pheromone allowed	confined	allowed	888split	orange888split41808	orange	R	6	RL		1	1	food	3	1	nest	1	3
2014-06-18	Morning	confined - pheromone allowed	confined	allowed	888split	orange888split41808	orange	R	7	L*L		0	1	food	3	0	nest
2014-06-18	Morning	confined - pheromone allowed	confined	allowed	3	blue341808	blue	R	0					food			nest	0	1
2014-06-18	Morning	confined - pheromone allowed	confined	allowed	3	blue341808	blue	R	1	RL		1	1	food	0	0	nest	1	3
2014-06-18	Morning	confined - pheromone allowed	confined	allowed	3	blue341808	blue	R	2	RL		1	1	food	1	1	nest	2	0
2014-06-18	Morning	confined - pheromone allowed	confined	allowed	3	blue341808	blue	R	3	RL		1	1	food	0	1	nest	0	0
2014-06-18	Morning	confined - pheromone allowed	confined	allowed	3	blue341808	blue	R	4	RL		1	1	food	0	0	nest	3	0
2014-06-18	Morning	confined - pheromone allowed	confined	allowed	3	blue341808	blue	R	5	RL		1	1	food	0	1	nest	0
2014-06-18	Morning	confined - pheromone allowed	confined	allowed	3	blue341808	blue	R	6	RL		1	1	food	0	1	nest	0	1
2014-06-18	Morning	confined - pheromone allowed	confined	allowed	3	blue341808	blue	R	7	LL		0	1	food	0	0	nest
2014-06-18	Morning	confined - pheromone allowed	confined	allowed	3	yellow341808	yellow	R	0					food			nest
2014-06-18	Morning	confined - pheromone allowed	confined	allowed	3	yellow341808	yellow	R	1					food			nest
2014-06-18	Morning	confined - pheromone allowed	confined	allowed	3	yellow341808	yellow	R	2					food			nest
2014-06-18	Morning	confined - pheromone allowed	confined	allowed	3	yellow341808	yellow	R	3					food			nest
2014-06-18	Morning	confined - pheromone allowed	confined	allowed	3	yellow341808	yellow	R	4					food			nest
2014-06-18	Morning	confined - pheromone allowed	confined	allowed	3	yellow341808	yellow	R	5					food			nest
2014-06-18	Morning	confined - pheromone allowed	confined	allowed	3	yellow341808	yellow	R	6					food			nest
2014-06-18	Morning	confined - pheromone allowed	confined	allowed	3	yellow341808	yellow	R	7					food			nest
2014-06-18	Morning	confined - pheromone allowed	confined	allowed	3	green341808	green	R	0					food			nest	0
2014-06-18	Morning	confined - pheromone allowed	confined	allowed	3	green341808	green	R	1	RL		1	1	food		1	nest
2014-06-18	Morning	confined - pheromone allowed	confined	allowed	3	green341808	green	R	2	RL		1	1	food			nest	1
2014-06-18	Morning	confined - pheromone allowed	confined	allowed	3	green341808	green	R	3	RL		1	1	food	3		nest	1
2014-06-18	Morning	confined - pheromone allowed	confined	allowed	3	green341808	green	R	4	RL		1	1	food	0		nest	4
2014-06-18	Morning	confined - pheromone allowed	confined	allowed	3	green341808	green	R	5	RL		1	1	food			nest
2014-06-18	Morning	confined - pheromone allowed	confined	allowed	3	green341808	green	R	6					food			nest
2014-06-18	Morning	confined - pheromone allowed	confined	allowed	3	green341808	green	R	7					food			nest
2014-06-18	Morning	confined - pheromone allowed	confined	allowed	3	red341808	red	R	0					food			nest	0
2014-06-18	Morning	confined - pheromone allowed	confined	allowed	3	red341808	red	R	1	RL		1	1	food	2	1	nest	0
2014-06-18	Morning	confined - pheromone allowed	confined	allowed	3	red341808	red	R	2	RL		1	1	food	2	0	nest
2014-06-18	Morning	confined - pheromone allowed	confined	allowed	3	red341808	red	R	3	RL		1	1	food	3	1	nest	2	1
2014-06-18	Morning	confined - pheromone allowed	confined	allowed	3	red341808	red	R	4	RL		1	1	food			nest	2	3
2014-06-18	Morning	confined - pheromone allowed	confined	allowed	3	red341808	red	R	5	RL		1	1	food	0	0	nest	0	2
2014-06-18	Morning	confined - pheromone allowed	confined	allowed	3	red341808	red	R	6	RL		1	1	food	0	1	nest	0	1
2014-06-18	Morning	confined - pheromone allowed	confined	allowed	3	red341808	red	R	7	LL		0	1	food	0	0	nest
2014-06-18	Morning	confined - pheromone allowed	confined	allowed	3	orange341808	orange	R	0					food			nest	1	4
2014-06-18	Morning	confined - pheromone allowed	confined	allowed	3	orange341808	orange	R	1	RL		1	1	food	0	0	nest	0	2
2014-06-18	Morning	confined - pheromone allowed	confined	allowed	3	orange341808	orange	R	2	RL		1	1	food	1		nest	2	2
2014-06-18	Morning	confined - pheromone allowed	confined	allowed	3	orange341808	orange	R	3	RL		1	1	food	2		nest	2
2014-06-18	Morning	confined - pheromone allowed	confined	allowed	3	orange341808	orange	R	4	RL		1	1	food	4	0	nest
2014-06-18	Morning	confined - pheromone allowed	confined	allowed	3	orange341808	orange	R	5	RL		1	1	food	4	2	nest	2
2014-06-18	Morning	confined - pheromone allowed	confined	allowed	3	orange341808	orange	R	6	RL		1	1	food	0	0	nest	0	0
2014-06-18	Morning	confined - pheromone allowed	confined	allowed	3	orange341808	orange	R	7	R*L	1	1	1	food	0	0	nest
2014-06-18	Afternoon	confined - pheromone allowed	confined	allowed	RGB8	blueRGB841808	blue	L	0					food			nest	0	0
2014-06-18	Afternoon	confined - pheromone allowed	confined	allowed	RGB8	blueRGB841808	blue	L	1	LR		1	1	food	1	2	nest	1	3
2014-06-18	Afternoon	confined - pheromone allowed	confined	allowed	RGB8	blueRGB841808	blue	L	2	LR		1	1	food	0	3	nest	2	2
2014-06-18	Afternoon	confined - pheromone allowed	confined	allowed	RGB8	blueRGB841808	blue	L	3	LR		1	1	food	4	5	nest	2	4
2014-06-18	Afternoon	confined - pheromone allowed	confined	allowed	RGB8	blueRGB841808	blue	L	4	LR		1	1	food	2	4	nest	3
2014-06-18	Afternoon	confined - pheromone allowed	confined	allowed	RGB8	blueRGB841808	blue	L	5					food			nest
2014-06-18	Afternoon	confined - pheromone allowed	confined	allowed	RGB8	blueRGB841808	blue	L	6					food			nest
2014-06-18	Afternoon	confined - pheromone allowed	confined	allowed	RGB8	blueRGB841808	blue	L	7					food			nest
2014-06-18	Afternoon	confined - pheromone allowed	confined	allowed	RGB8	yellowRGB841808	yellow	L	0					food			nest
2014-06-18	Afternoon	confined - pheromone allowed	confined	allowed	RGB8	yellowRGB841808	yellow	L	1	LR		1	1	food	0	0	nest	0
2014-06-18	Afternoon	confined - pheromone allowed	confined	allowed	RGB8	yellowRGB841808	yellow	L	2	LR		1	1	food	0	0	nest	0	0
2014-06-18	Afternoon	confined - pheromone allowed	confined	allowed	RGB8	yellowRGB841808	yellow	L	3	LR		1	1	food	0	0	nest	0	0
2014-06-18	Afternoon	confined - pheromone allowed	confined	allowed	RGB8	yellowRGB841808	yellow	L	4	LR		1	1	food		0	nest	0	0
2014-06-18	Afternoon	confined - pheromone allowed	confined	allowed	RGB8	yellowRGB841808	yellow	L	5	LR		1	1	food		0	nest	0
2014-06-18	Afternoon	confined - pheromone allowed	confined	allowed	RGB8	yellowRGB841808	yellow	L	6	LR		1	1	food	0	0	nest	0	0
2014-06-18	Afternoon	confined - pheromone allowed	confined	allowed	RGB8	yellowRGB841808	yellow	L	7	RL		0	0	food	0	1	nest
2014-06-18	Afternoon	confined - pheromone allowed	confined	allowed	RGB8	greenRGB841808	green	L	0	LR				food			nest
2014-06-18	Afternoon	confined - pheromone allowed	confined	allowed	RGB8	greenRGB841808	green	L	1	LR		1	1	food	6	5	nest	0	1
2014-06-18	Afternoon	confined - pheromone allowed	confined	allowed	RGB8	greenRGB841808	green	L	2	LR		1	1	food		0	nest	1
2014-06-18	Afternoon	confined - pheromone allowed	confined	allowed	RGB8	greenRGB841808	green	L	3	LR		1	1	food		1	nest	2
2014-06-18	Afternoon	confined - pheromone allowed	confined	allowed	RGB8	greenRGB841808	green	L	4	LR		1	1	food		0	nest	2	1
2014-06-18	Afternoon	confined - pheromone allowed	confined	allowed	RGB8	greenRGB841808	green	L	5	LR		1	1	food	0	0	nest	0
2014-06-18	Afternoon	confined - pheromone allowed	confined	allowed	RGB8	greenRGB841808	green	L	6	LR		1	1	food	0	0	nest	0	0
2014-06-18	Afternoon	confined - pheromone allowed	confined	allowed	RGB8	greenRGB841808	green	L	7	RR		0	1	food	0	2	nest
2014-06-18	Afternoon	confined - pheromone allowed	confined	allowed	RGB8	redRGB841808	red	L	0					food			nest
2014-06-18	Afternoon	confined - pheromone allowed	confined	allowed	RGB8	redRGB841808	red	L	1	LR		1	1	food		0	nest	0	0
2014-06-18	Afternoon	confined - pheromone allowed	confined	allowed	RGB8	redRGB841808	red	L	2	LR		1	1	food	0		nest	1	0
2014-06-18	Afternoon	confined - pheromone allowed	confined	allowed	RGB8	redRGB841808	red	L	3	LR		1	1	food	0	0	nest	0	0
2014-06-18	Afternoon	confined - pheromone allowed	confined	allowed	RGB8	redRGB841808	red	L	4	LR		1	1	food	1	0	nest	0	0
2014-06-18	Afternoon	confined - pheromone allowed	confined	allowed	RGB8	redRGB841808	red	L	5	LR		1	1	food	0	0	nest	0	1
2014-06-18	Afternoon	confined - pheromone allowed	confined	allowed	RGB8	redRGB841808	red	L	6	LR		1	1	food	0	2	nest	1	1
2014-06-18	Afternoon	confined - pheromone allowed	confined	allowed	RGB8	redRGB841808	red	L	7	LL		1	0	food	0	0	nest
2014-06-18	Afternoon	confined - pheromone allowed	confined	allowed	RGB8	orangeRGB841808	orange	L	0	LR				food			nest
2014-06-18	Afternoon	confined - pheromone allowed	confined	allowed	RGB8	orangeRGB841808	orange	L	1	LR		1	1	food	4	2	nest	1	2
2014-06-18	Afternoon	confined - pheromone allowed	confined	allowed	RGB8	orangeRGB841808	orange	L	2	LR		1	1	food	2	3	nest
2014-06-18	Afternoon	confined - pheromone allowed	confined	allowed	RGB8	orangeRGB841808	orange	L	3	LR		1	1	food			nest	0	0
2014-06-18	Afternoon	confined - pheromone allowed	confined	allowed	RGB8	orangeRGB841808	orange	L	4	LR		1	1	food	0	0	nest	0	0
2014-06-18	Afternoon	confined - pheromone allowed	confined	allowed	RGB8	orangeRGB841808	orange	L	5	LR		1	1	food	0	1	nest	1
2014-06-18	Afternoon	confined - pheromone allowed	confined	allowed	RGB8	orangeRGB841808	orange	L	6	LR		1	1	food	0	0	nest	0	0
2014-06-18	Afternoon	confined - pheromone allowed	confined	allowed	RGB8	orangeRGB841808	orange	L	7	LR		1	1	food	0	1	nest
2014-06-18	Afternoon	confined - pheromone allowed	confined	allowed	3	blue341808	blue	L	0					food			nest
2014-06-18	Afternoon	confined - pheromone allowed	confined	allowed	3	blue341808	blue	L	1	LR		1	1	food	3	1	nest	3	2
2014-06-18	Afternoon	confined - pheromone allowed	confined	allowed	3	blue341808	blue	L	2	LR		1	1	food	3	3	nest	0	2
2014-06-18	Afternoon	confined - pheromone allowed	confined	allowed	3	blue341808	blue	L	3	LR		1	1	food	2	0	nest	1	2
2014-06-18	Afternoon	confined - pheromone allowed	confined	allowed	3	blue341808	blue	L	4	LR		1	1	food	0	0	nest	0	0
2014-06-18	Afternoon	confined - pheromone allowed	confined	allowed	3	blue341808	blue	L	5	LR		1	1	food	0	0	nest	0
2014-06-18	Afternoon	confined - pheromone allowed	confined	allowed	3	blue341808	blue	L	6	LR		1	1	food	0	0	nest	0	0
2014-06-18	Afternoon	confined - pheromone allowed	confined	allowed	3	blue341808	blue	L	7	LL		1	0	food	0	0	nest
2014-06-18	Afternoon	confined - pheromone allowed	confined	allowed	3	yellow341808	yellow	L	0					food			nest
2014-06-18	Afternoon	confined - pheromone allowed	confined	allowed	3	yellow341808	yellow	L	1	LR		1	1	food		0	nest
2014-06-18	Afternoon	confined - pheromone allowed	confined	allowed	3	yellow341808	yellow	L	2	LR		1	1	food	1	0	nest	0	0
2014-06-18	Afternoon	confined - pheromone allowed	confined	allowed	3	yellow341808	yellow	L	3	LR		1	1	food	2	0	nest
2014-06-18	Afternoon	confined - pheromone allowed	confined	allowed	3	yellow341808	yellow	L	4	LR		1	1	food	1	0	nest	1	1
2014-06-18	Afternoon	confined - pheromone allowed	confined	allowed	3	yellow341808	yellow	L	5	LR		1	1	food		3	nest	1
2014-06-18	Afternoon	confined - pheromone allowed	confined	allowed	3	yellow341808	yellow	L	6	LR		1	1	food		0	nest	0	0
2014-06-18	Afternoon	confined - pheromone allowed	confined	allowed	3	yellow341808	yellow	L	7	R*L	1	0	0	food	0	0	nest
2014-06-18	Afternoon	confined - pheromone allowed	confined	allowed	3	green341808	green	L	0	LR				food			nest
2014-06-18	Afternoon	confined - pheromone allowed	confined	allowed	3	green341808	green	L	1	LR		1	1	food		0	nest	4	3
2014-06-18	Afternoon	confined - pheromone allowed	confined	allowed	3	green341808	green	L	2	LR		1	1	food	4	1	nest	3	1
2014-06-18	Afternoon	confined - pheromone allowed	confined	allowed	3	green341808	green	L	3	LR		1	1	food	1	2	nest	3	2
2014-06-18	Afternoon	confined - pheromone allowed	confined	allowed	3	green341808	green	L	4	LR		1	1	food		5	nest	2	2
2014-06-18	Afternoon	confined - pheromone allowed	confined	allowed	3	green341808	green	L	5	LR		1	1	food	3	3	nest	2	2
2014-06-18	Afternoon	confined - pheromone allowed	confined	allowed	3	green341808	green	L	6	LR		1	1	food	2	5	nest	1
2014-06-18	Afternoon	confined - pheromone allowed	confined	allowed	3	green341808	green	L	7	RR		0	1	food	0	0	nest
2014-06-18	Afternoon	confined - pheromone allowed	confined	allowed	3	red341808	red	L	0					food			nest
2014-06-18	Afternoon	confined - pheromone allowed	confined	allowed	3	red341808	red	L	1	LR		1	1	food	2	3	nest	4	3
2014-06-18	Afternoon	confined - pheromone allowed	confined	allowed	3	red341808	red	L	2	LR		1	1	food	5	4	nest	3
2014-06-18	Afternoon	confined - pheromone allowed	confined	allowed	3	red341808	red	L	3	LR		1	1	food	3	3	nest	2	2
2014-06-18	Afternoon	confined - pheromone allowed	confined	allowed	3	red341808	red	L	4	LR		1	1	food	2	3	nest	1	2
2014-06-18	Afternoon	confined - pheromone allowed	confined	allowed	3	red341808	red	L	5	LR		1	1	food	4	4	nest	1	2
2014-06-18	Afternoon	confined - pheromone allowed	confined	allowed	3	red341808	red	L	6	LR		1	1	food		5	nest	2
2014-06-18	Afternoon	confined - pheromone allowed	confined	allowed	3	red341808	red	L	7	RR		0	1	food	0	0	nest
2014-06-18	Afternoon	confined - pheromone allowed	confined	allowed	3	orange341808	orange	L	0	LR				food			nest
2014-06-18	Afternoon	confined - pheromone allowed	confined	allowed	3	orange341808	orange	L	1	LR		1	1	food	0		nest	3
2014-06-18	Afternoon	confined - pheromone allowed	confined	allowed	3	orange341808	orange	L	2	LR		1	1	food	2	1	nest	1	2
2014-06-18	Afternoon	confined - pheromone allowed	confined	allowed	3	orange341808	orange	L	3	LR		1	1	food	0	0	nest	1	1
2014-06-18	Afternoon	confined - pheromone allowed	confined	allowed	3	orange341808	orange	L	4	LR		1	1	food		0	nest
2014-06-18	Afternoon	confined - pheromone allowed	confined	allowed	3	orange341808	orange	L	5	LR		1	1	food	0	2	nest	0	1
2014-06-18	Afternoon	confined - pheromone allowed	confined	allowed	3	orange341808	orange	L	6	LR		1	1	food	0	0	nest
2014-06-18	Afternoon	confined - pheromone allowed	confined	allowed	3	orange341808	orange	L	7					food			nest
2014-06-19	Morning	confined - pheromone allowed	confined	allowed	11	blue1141809	blue	L	0					food			nest	3	2
2014-06-19	Morning	confined - pheromone allowed	confined	allowed	11	blue1141809	blue	L	1	LR		1	1	food			nest	2	3
2014-06-19	Morning	confined - pheromone allowed	confined	allowed	11	blue1141809	blue	L	2	LR		1	1	food	3	1	nest	3	4
2014-06-19	Morning	confined - pheromone allowed	confined	allowed	11	blue1141809	blue	L	3	LR		1	1	food		0	nest	2	2
2014-06-19	Morning	confined - pheromone allowed	confined	allowed	11	blue1141809	blue	L	4	LR		1	1	food	1	1	nest	1	1
2014-06-19	Morning	confined - pheromone allowed	confined	allowed	11	blue1141809	blue	L	5	LR		1	1	food	0	0	nest	0	1
2014-06-19	Morning	confined - pheromone allowed	confined	allowed	11	blue1141809	blue	L	6	LR		1	1	food	0	0	nest	0	0
2014-06-19	Morning	confined - pheromone allowed	confined	allowed	11	blue1141809	blue	L	7	RL		0	0	food	0	0	nest
2014-06-19	Morning	confined - pheromone allowed	confined	allowed	11	yellow1141809	yellow	L	0					food			nest		0
2014-06-19	Morning	confined - pheromone allowed	confined	allowed	11	yellow1141809	yellow	L	1	LR		1	1	food	1	0	nest	4	4
2014-06-19	Morning	confined - pheromone allowed	confined	allowed	11	yellow1141809	yellow	L	2	LR		1	1	food	3	0	nest	2	1
2014-06-19	Morning	confined - pheromone allowed	confined	allowed	11	yellow1141809	yellow	L	3	LR		1	1	food	2	1	nest	0	1
2014-06-19	Morning	confined - pheromone allowed	confined	allowed	11	yellow1141809	yellow	L	4	LR		1	1	food	3	0	nest	0	2
2014-06-19	Morning	confined - pheromone allowed	confined	allowed	11	yellow1141809	yellow	L	5	LR		1	1	food	2	1	nest	1	1
2014-06-19	Morning	confined - pheromone allowed	confined	allowed	11	yellow1141809	yellow	L	6	LR		1	1	food	1	0	nest	1	0
2014-06-19	Morning	confined - pheromone allowed	confined	allowed	11	yellow1141809	yellow	L	7	R*L	1	0	0	food	0	1	nest
2014-06-19	Morning	confined - pheromone allowed	confined	allowed	11	green1141809	green	L	0	LR				food			nest
2014-06-19	Morning	confined - pheromone allowed	confined	allowed	11	green1141809	green	L	1	LR		1	1	food		0	nest
2014-06-19	Morning	confined - pheromone allowed	confined	allowed	11	green1141809	green	L	2	LR		1	1	food	2	4	nest	2
2014-06-19	Morning	confined - pheromone allowed	confined	allowed	11	green1141809	green	L	3	LR		1	1	food	2	3	nest	3
2014-06-19	Morning	confined - pheromone allowed	confined	allowed	11	green1141809	green	L	4	LR		1	1	food	2	4	nest	2
2014-06-19	Morning	confined - pheromone allowed	confined	allowed	11	green1141809	green	L	5	LR		1	1	food	1	3	nest
2014-06-19	Morning	confined - pheromone allowed	confined	allowed	11	green1141809	green	L	6	LR		1	1	food	0	1	nest	3	2
2014-06-19	Morning	confined - pheromone allowed	confined	allowed	11	green1141809	green	L	7	RR		0	1	food			nest
2014-06-19	Morning	confined - pheromone allowed	confined	allowed	11	red1141809	red	L	0					food			nest	0	0
2014-06-19	Morning	confined - pheromone allowed	confined	allowed	11	red1141809	red	L	1	LR		1	1	food		0	nest
2014-06-19	Morning	confined - pheromone allowed	confined	allowed	11	red1141809	red	L	2	LR		1	1	food	3	2	nest	3	4
2014-06-19	Morning	confined - pheromone allowed	confined	allowed	11	red1141809	red	L	3	LR		1	1	food	3	3	nest	2	3
2014-06-19	Morning	confined - pheromone allowed	confined	allowed	11	red1141809	red	L	4	LR		1	1	food			nest		2
2014-06-19	Morning	confined - pheromone allowed	confined	allowed	11	red1141809	red	L	5	LR		1	1	food	2	4	nest	1	1
2014-06-19	Morning	confined - pheromone allowed	confined	allowed	11	red1141809	red	L	6	LR		1	1	food	1	3	nest	1	1
2014-06-19	Morning	confined - pheromone allowed	confined	allowed	11	red1141809	red	L	7	L*R	1	1	1	food	0	0	nest
2014-06-19	Morning	confined - pheromone allowed	confined	allowed	11	orange1141809	orange	L	0	LR				food			nest	0	0
2014-06-19	Morning	confined - pheromone allowed	confined	allowed	11	orange1141809	orange	L	1	LR		1	1	food	0	0	nest		3
2014-06-19	Morning	confined - pheromone allowed	confined	allowed	11	orange1141809	orange	L	2	LR		1	1	food	2	0	nest
2014-06-19	Morning	confined - pheromone allowed	confined	allowed	11	orange1141809	orange	L	3	LR		1	1	food	1	0	nest	2	2
2014-06-19	Morning	confined - pheromone allowed	confined	allowed	11	orange1141809	orange	L	4	LR		1	1	food	0		nest	1
2014-06-19	Morning	confined - pheromone allowed	confined	allowed	11	orange1141809	orange	L	5	LR		1	1	food	0	0	nest	2	2
2014-06-19	Morning	confined - pheromone allowed	confined	allowed	11	orange1141809	orange	L	6	LR		1	1	food	1	0	nest	0	0
2014-06-19	Morning	confined - pheromone allowed	confined	allowed	11	orange1141809	orange	L	7	R*L	1	0	0	food	1	0	nest
2014-06-19	Morning	confined - pheromone allowed	confined	allowed	11	blue1141809	blue	R	0					food			nest
2014-06-19	Morning	confined - pheromone allowed	confined	allowed	11	blue1141809	blue	R	1	RL		1	1	food	1	0	nest	3	2
2014-06-19	Morning	confined - pheromone allowed	confined	allowed	11	blue1141809	blue	R	2	RL		1	1	food	0	0	nest	3
2014-06-19	Morning	confined - pheromone allowed	confined	allowed	11	blue1141809	blue	R	3	RL		1	1	food	3	0	nest	1	2
2014-06-19	Morning	confined - pheromone allowed	confined	allowed	11	blue1141809	blue	R	4	RL		1	1	food	2	1	nest		3
2014-06-19	Morning	confined - pheromone allowed	confined	allowed	11	blue1141809	blue	R	5	RL		1	1	food	0	0	nest	1	2
2014-06-19	Morning	confined - pheromone allowed	confined	allowed	11	blue1141809	blue	R	6	RL		1	1	food	0		nest
2014-06-19	Morning	confined - pheromone allowed	confined	allowed	11	blue1141809	blue	R	7	L*L	1	0	1	food	1	0	nest
2014-06-19	Morning	confined - pheromone allowed	confined	allowed	11	yellow1141809	yellow	R	0					food			nest
2014-06-19	Morning	confined - pheromone allowed	confined	allowed	11	yellow1141809	yellow	R	1	RL		1	1	food	1	0	nest	0	3
2014-06-19	Morning	confined - pheromone allowed	confined	allowed	11	yellow1141809	yellow	R	2	RL		1	1	food	0	0	nest	0
2014-06-19	Morning	confined - pheromone allowed	confined	allowed	11	yellow1141809	yellow	R	3	RL		1	1	food		3	nest	6	1
2014-06-19	Morning	confined - pheromone allowed	confined	allowed	11	yellow1141809	yellow	R	4	RL		1	1	food	0		nest	0	0
2014-06-19	Morning	confined - pheromone allowed	confined	allowed	11	yellow1141809	yellow	R	5	RL		1	1	food		1	nest
2014-06-19	Morning	confined - pheromone allowed	confined	allowed	11	yellow1141809	yellow	R	6	RL		1	1	food	1	0	nest	0	0
2014-06-19	Morning	confined - pheromone allowed	confined	allowed	11	yellow1141809	yellow	R	7	LL		0	1	food	1	0	nest
2014-06-19	Morning	confined - pheromone allowed	confined	allowed	11	green1141809	green	R	0	RL				food			nest
2014-06-19	Morning	confined - pheromone allowed	confined	allowed	11	green1141809	green	R	1	RL		1	1	food	3	0	nest
2014-06-19	Morning	confined - pheromone allowed	confined	allowed	11	green1141809	green	R	2	RL		1	1	food	0	1	nest	1	2
2014-06-19	Morning	confined - pheromone allowed	confined	allowed	11	green1141809	green	R	3	RL		1	1	food	0	0	nest		2
2014-06-19	Morning	confined - pheromone allowed	confined	allowed	11	green1141809	green	R	4	RL		1	1	food	1	2	nest	2	3
2014-06-19	Morning	confined - pheromone allowed	confined	allowed	11	green1141809	green	R	5	RL		1	1	food		0	nest	0	0
2014-06-19	Morning	confined - pheromone allowed	confined	allowed	11	green1141809	green	R	6	RL		1	1	food	0	0	nest	0	0
2014-06-19	Morning	confined - pheromone allowed	confined	allowed	11	green1141809	green	R	7	LL		0	1	food	0	1	nest
2014-06-19	Morning	confined - pheromone allowed	confined	allowed	11	red1141809	red	R	0					food			nest	2
2014-06-19	Morning	confined - pheromone allowed	confined	allowed	11	red1141809	red	R	1	RL		1	1	food	1		nest	2	2
2014-06-19	Morning	confined - pheromone allowed	confined	allowed	11	red1141809	red	R	2	RL		1	1	food		0	nest	2	5
2014-06-19	Morning	confined - pheromone allowed	confined	allowed	11	red1141809	red	R	3	RL		1	1	food	3	4	nest	3	3
2014-06-19	Morning	confined - pheromone allowed	confined	allowed	11	red1141809	red	R	4	RL		1	1	food	2	3	nest	3
2014-06-19	Morning	confined - pheromone allowed	confined	allowed	11	red1141809	red	R	5	RL		1	1	food	3	1	nest	2	2
2014-06-19	Morning	confined - pheromone allowed	confined	allowed	11	red1141809	red	R	6	RL		1	1	food	0	2	nest	0	3
2014-06-19	Morning	confined - pheromone allowed	confined	allowed	11	red1141809	red	R	7	L*L	1	0	1	food	1	0	nest
2014-06-19	Morning	confined - pheromone allowed	confined	allowed	11	orange1141809	orange	R	0					food			nest
2014-06-19	Morning	confined - pheromone allowed	confined	allowed	11	orange1141809	orange	R	1	RL		1	1	food	1	1	nest		3
2014-06-19	Morning	confined - pheromone allowed	confined	allowed	11	orange1141809	orange	R	2	RL		1	1	food	0	0	nest	0	2
2014-06-19	Morning	confined - pheromone allowed	confined	allowed	11	orange1141809	orange	R	3	RL		1	1	food			nest	0
2014-06-19	Morning	confined - pheromone allowed	confined	allowed	11	orange1141809	orange	R	4	RL		1	1	food	0	0	nest	0	1
2014-06-19	Morning	confined - pheromone allowed	confined	allowed	11	orange1141809	orange	R	5	RL		1	1	food			nest	0
2014-06-19	Morning	confined - pheromone allowed	confined	allowed	11	orange1141809	orange	R	6	RL		1	1	food	1	0	nest	1
2014-06-19	Morning	confined - pheromone allowed	confined	allowed	11	orange1141809	orange	R	7	LL		0	1	food	1	0	nest
2014-06-19	Morning	confined - pheromone allowed	confined	allowed	12	blue1241809	blue	L	0					food			nest	0
2014-06-19	Morning	confined - pheromone allowed	confined	allowed	12	blue1241809	blue	L	1	LR		1	1	food	0	0	nest
2014-06-19	Morning	confined - pheromone allowed	confined	allowed	12	blue1241809	blue	L	2					food			nest
2014-06-19	Morning	confined - pheromone allowed	confined	allowed	12	blue1241809	blue	L	3					food			nest
2014-06-19	Morning	confined - pheromone allowed	confined	allowed	12	blue1241809	blue	L	4					food			nest
2014-06-19	Morning	confined - pheromone allowed	confined	allowed	12	blue1241809	blue	L	5					food			nest
2014-06-19	Morning	confined - pheromone allowed	confined	allowed	12	blue1241809	blue	L	6					food			nest
2014-06-19	Morning	confined - pheromone allowed	confined	allowed	12	blue1241809	blue	L	7					food			nest
2014-06-19	Morning	confined - pheromone allowed	confined	allowed	12	yellow1241809	yellow	L	0					food			nest		3
2014-06-19	Morning	confined - pheromone allowed	confined	allowed	12	yellow1241809	yellow	L	1	LR		1	1	food		0	nest	2
2014-06-19	Morning	confined - pheromone allowed	confined	allowed	12	yellow1241809	yellow	L	2	LR		1	1	food	4		nest
2014-06-19	Morning	confined - pheromone allowed	confined	allowed	12	yellow1241809	yellow	L	3	LR		1	1	food	0	0	nest	1
2014-06-19	Morning	confined - pheromone allowed	confined	allowed	12	yellow1241809	yellow	L	4	LR		1	1	food	1	2	nest	0
2014-06-19	Morning	confined - pheromone allowed	confined	allowed	12	yellow1241809	yellow	L	5	LR		1	1	food	0	0	nest	0	0
2014-06-19	Morning	confined - pheromone allowed	confined	allowed	12	yellow1241809	yellow	L	6	LR		1	1	food	0	0	nest	0	0
2014-06-19	Morning	confined - pheromone allowed	confined	allowed	12	yellow1241809	yellow	L	7	RR		0	1	food	0	0	nest
2014-06-19	Morning	confined - pheromone allowed	confined	allowed	12	green1241809	green	L	0	LR				food			nest	0
2014-06-19	Morning	confined - pheromone allowed	confined	allowed	12	green1241809	green	L	1	LR		1	1	food	0		nest		2
2014-06-19	Morning	confined - pheromone allowed	confined	allowed	12	green1241809	green	L	2	LR		1	1	food	2		nest	4	3
2014-06-19	Morning	confined - pheromone allowed	confined	allowed	12	green1241809	green	L	3	LR		1	1	food	0	0	nest
2014-06-19	Morning	confined - pheromone allowed	confined	allowed	12	green1241809	green	L	4	LR		1	1	food	0	0	nest	2	2
2014-06-19	Morning	confined - pheromone allowed	confined	allowed	12	green1241809	green	L	5	LR		1	1	food	0	0	nest	3
2014-06-19	Morning	confined - pheromone allowed	confined	allowed	12	green1241809	green	L	6	LR		1	1	food	1	2	nest	2	3
2014-06-19	Morning	confined - pheromone allowed	confined	allowed	12	green1241809	green	L	7	RL		0	0	food	2	0	nest
2014-06-19	Morning	confined - pheromone allowed	confined	allowed	12	red1241809	red	L	0					food			nest
2014-06-19	Morning	confined - pheromone allowed	confined	allowed	12	red1241809	red	L	1	LR		1	1	food		1	nest	0	1
2014-06-19	Morning	confined - pheromone allowed	confined	allowed	12	red1241809	red	L	2	LR		1	1	food	3	0	nest
2014-06-19	Morning	confined - pheromone allowed	confined	allowed	12	red1241809	red	L	3	LR		1	1	food		3	nest
2014-06-19	Morning	confined - pheromone allowed	confined	allowed	12	red1241809	red	L	4	LR		1	1	food		0	nest	0	0
2014-06-19	Morning	confined - pheromone allowed	confined	allowed	12	red1241809	red	L	5	LR		1	1	food	0	2	nest	0	2
2014-06-19	Morning	confined - pheromone allowed	confined	allowed	12	red1241809	red	L	6	LR		1	1	food			nest		1
2014-06-19	Morning	confined - pheromone allowed	confined	allowed	12	red1241809	red	L	7	RR		0	1	food	0	0	nest
2014-06-19	Morning	confined - pheromone allowed	confined	allowed	12	orange1241809	orange	L	0	LR				food			nest
2014-06-19	Morning	confined - pheromone allowed	confined	allowed	12	orange1241809	orange	L	1	LR		1	1	food		4	nest	4	3
2014-06-19	Morning	confined - pheromone allowed	confined	allowed	12	orange1241809	orange	L	2	LR		1	1	food	2	1	nest	3	2
2014-06-19	Morning	confined - pheromone allowed	confined	allowed	12	orange1241809	orange	L	3	LR		1	1	food			nest	3	3
2014-06-19	Morning	confined - pheromone allowed	confined	allowed	12	orange1241809	orange	L	4	LR		1	1	food	3	1	nest	1	1
2014-06-19	Morning	confined - pheromone allowed	confined	allowed	12	orange1241809	orange	L	5	LR		1	1	food	3	2	nest		1
2014-06-19	Morning	confined - pheromone allowed	confined	allowed	12	orange1241809	orange	L	6	LR		1	1	food	2	2	nest	2	2
2014-06-19	Morning	confined - pheromone allowed	confined	allowed	12	orange1241809	orange	L	7	RR		0	1	food	0	0	nest
2014-06-26	Afternoon	confined - pheromone allowed	confined	allowed	11	blue1141816	blue	R	0					food			nest	1	2
2014-06-26	Afternoon	confined - pheromone allowed	confined	allowed	11	blue1141816	blue	R	1	RL		1	1	food	0	1	nest	1
2014-06-26	Afternoon	confined - pheromone allowed	confined	allowed	11	blue1141816	blue	R	2	RL		1	1	food	0	0	nest	0	0
2014-06-26	Afternoon	confined - pheromone allowed	confined	allowed	11	blue1141816	blue	R	3	RL		1	1	food	0	0	nest	0
2014-06-26	Afternoon	confined - pheromone allowed	confined	allowed	11	blue1141816	blue	R	4	RL		1	1	food	1	0	nest	0	0
2014-06-26	Afternoon	confined - pheromone allowed	confined	allowed	11	blue1141816	blue	R	5	RL		1	1	food	0	0	nest	0	0
2014-06-26	Afternoon	confined - pheromone allowed	confined	allowed	11	blue1141816	blue	R	6	RL		1	1	food	0	0	nest	0	0
2014-06-26	Afternoon	confined - pheromone allowed	confined	allowed	11	blue1141816	blue	R	7	R*L	1	1	1	food	0	0	nest
2014-06-26	Afternoon	confined - pheromone allowed	confined	allowed	11	yellow1141816	yellow	R	0					food			nest	0	2
2014-06-26	Afternoon	confined - pheromone allowed	confined	allowed	11	yellow1141816	yellow	R	1	RL		1	1	food	2	0	nest	1	0
2014-06-26	Afternoon	confined - pheromone allowed	confined	allowed	11	yellow1141816	yellow	R	2	RL		1	1	food	0	0	nest	1	1
2014-06-26	Afternoon	confined - pheromone allowed	confined	allowed	11	yellow1141816	yellow	R	3	RL		1	1	food	0	1	nest		2
2014-06-26	Afternoon	confined - pheromone allowed	confined	allowed	11	yellow1141816	yellow	R	4	RL		1	1	food	1	0	nest	0	0
2014-06-26	Afternoon	confined - pheromone allowed	confined	allowed	11	yellow1141816	yellow	R	5	RL		1	1	food	0	0	nest	0
2014-06-26	Afternoon	confined - pheromone allowed	confined	allowed	11	yellow1141816	yellow	R	6	RL		1	1	food	0	0	nest
2014-06-26	Afternoon	confined - pheromone allowed	confined	allowed	11	yellow1141816	yellow	R	7	RL		1	1	food	0	0	nest
2014-06-26	Afternoon	confined - pheromone allowed	confined	allowed	11	green1141816	green	R	0	RL				food			nest	3	0
2014-06-26	Afternoon	confined - pheromone allowed	confined	allowed	11	green1141816	green	R	1	RL		1	1	food	3	0	nest	2	3
2014-06-26	Afternoon	confined - pheromone allowed	confined	allowed	11	green1141816	green	R	2	RL		1	1	food	1	0	nest	2
2014-06-26	Afternoon	confined - pheromone allowed	confined	allowed	11	green1141816	green	R	3	RL		1	1	food	1	1	nest
2014-06-26	Afternoon	confined - pheromone allowed	confined	allowed	11	green1141816	green	R	4	RL		1	1	food	1	0	nest	0	2
2014-06-26	Afternoon	confined - pheromone allowed	confined	allowed	11	green1141816	green	R	5	RL		1	1	food	1	1	nest	0	0
2014-06-26	Afternoon	confined - pheromone allowed	confined	allowed	11	green1141816	green	R	6	RL		1	1	food		0	nest	1
2014-06-26	Afternoon	confined - pheromone allowed	confined	allowed	11	green1141816	green	R	7	RL		1	1	food	0	0	nest
2014-06-26	Afternoon	confined - pheromone allowed	confined	allowed	11	red1141816	red	R	0					food			nest
2014-06-26	Afternoon	confined - pheromone allowed	confined	allowed	11	red1141816	red	R	1	RL		1	1	food	1	1	nest
2014-06-26	Afternoon	confined - pheromone allowed	confined	allowed	11	red1141816	red	R	2	RL		1	1	food	0	1	nest	1	1
2014-06-26	Afternoon	confined - pheromone allowed	confined	allowed	11	red1141816	red	R	3	RL		1	1	food	0	0	nest	1	0
2014-06-26	Afternoon	confined - pheromone allowed	confined	allowed	11	red1141816	red	R	4	RL		1	1	food	1	1	nest	3	2
2014-06-26	Afternoon	confined - pheromone allowed	confined	allowed	11	red1141816	red	R	5	RL		1	1	food	1	2	nest
2014-06-26	Afternoon	confined - pheromone allowed	confined	allowed	11	red1141816	red	R	6					food			nest
2014-06-26	Afternoon	confined - pheromone allowed	confined	allowed	11	red1141816	red	R	7					food			nest
2014-06-26	Afternoon	confined - pheromone allowed	confined	allowed	11	orange1141816	orange	R	0					food			nest	4
2014-06-26	Afternoon	confined - pheromone allowed	confined	allowed	11	orange1141816	orange	R	1	RL		1	1	food	3	0	nest	2	6
2014-06-26	Afternoon	confined - pheromone allowed	confined	allowed	11	orange1141816	orange	R	2	RL		1	1	food	0	0	nest	1	1
2014-06-26	Afternoon	confined - pheromone allowed	confined	allowed	11	orange1141816	orange	R	3	RL		1	1	food	1	2	nest	0	1
2014-06-26	Afternoon	confined - pheromone allowed	confined	allowed	11	orange1141816	orange	R	4	RL		1	1	food	0	1	nest	0	1
2014-06-26	Afternoon	confined - pheromone allowed	confined	allowed	11	orange1141816	orange	R	5	RL		1	1	food	1	2	nest	1	1
2014-06-26	Afternoon	confined - pheromone allowed	confined	allowed	11	orange1141816	orange	R	6	RL		1	1	food	0	0	nest	1	0
2014-06-26	Afternoon	confined - pheromone allowed	confined	allowed	11	orange1141816	orange	R	7	LL		0	1	food	0	1	nest
2014-07-15	Morning	open - pheromone allowed	open	allowed	888	gold88841835	gold	R	0					food			nest
2014-07-15	Morning	open - pheromone allowed	open	allowed	888	gold88841835	gold	R	1	RR		1	0	food	0	0	nest	1
2014-07-15	Morning	open - pheromone allowed	open	allowed	888	gold88841835	gold	R	2	RL		1	1	food	0	1	nest	0
2014-07-15	Morning	open - pheromone allowed	open	allowed	888	gold88841835	gold	R	3	RL		1	1	food	0	0	nest	0	0
2014-07-15	Morning	open - pheromone allowed	open	allowed	888	gold88841835	gold	R	4	RL		1	1	food	0	0	nest
2014-07-15	Morning	open - pheromone allowed	open	allowed	888	gold88841835	gold	R	5	L*L	1	0	1	food		0	nest	0	0
2014-07-15	Morning	open - pheromone allowed	open	allowed	888	gold88841835	gold	R	6	RL		1	1	food	1	1	nest	0	0
2014-07-15	Morning	open - pheromone allowed	open	allowed	888	gold88841835	gold	R	7	RL		1	1	food			nest
2014-07-15	Morning	open - pheromone allowed	open	allowed	888	yellow88841835	yellow	R	0					food			nest	3
2014-07-15	Morning	open - pheromone allowed	open	allowed	888	yellow88841835	yellow	R	1	L*L	1	0	1	food	0	1	nest	5
2014-07-15	Morning	open - pheromone allowed	open	allowed	888	yellow88841835	yellow	R	2	RL		1	1	food	0	0	nest	0
2014-07-15	Morning	open - pheromone allowed	open	allowed	888	yellow88841835	yellow	R	3	L*L	1	0	1	food	0	0	nest	1	2
2014-07-15	Morning	open - pheromone allowed	open	allowed	888	yellow88841835	yellow	R	4	RL		1	1	food	0	0	nest	0
2014-07-15	Morning	open - pheromone allowed	open	allowed	888	yellow88841835	yellow	R	5	RL		1	1	food	0	0	nest	0	0
2014-07-15	Morning	open - pheromone allowed	open	allowed	888	yellow88841835	yellow	R	6	RL		1	1	food	2	1	nest	1	0
2014-07-15	Morning	open - pheromone allowed	open	allowed	888	yellow88841835	yellow	R	7	RR		1	0	food	0	1	nest
2014-07-15	Morning	open - pheromone allowed	open	allowed	888	green88841835	green	R	0					food			nest		2
2014-07-15	Morning	open - pheromone allowed	open	allowed	888	green88841835	green	R	1	LR		0	0	food	0	0	nest		3
2014-07-15	Morning	open - pheromone allowed	open	allowed	888	green88841835	green	R	2	L*L	1	0	1	food			nest	1	0
2014-07-15	Morning	open - pheromone allowed	open	allowed	888	green88841835	green	R	3	RL		1	1	food	0	0	nest
2014-07-15	Morning	open - pheromone allowed	open	allowed	888	green88841835	green	R	4	RL		1	1	food	0	0	nest	0	0
2014-07-15	Morning	open - pheromone allowed	open	allowed	888	green88841835	green	R	5	RL		1	1	food	0	0	nest	1	0
2014-07-15	Morning	open - pheromone allowed	open	allowed	888	green88841835	green	R	6	RL		1	1	food			nest	2	1
2014-07-15	Morning	open - pheromone allowed	open	allowed	888	green88841835	green	R	7	RL		1	1	food	0	0	nest
2014-07-15	Morning	open - pheromone allowed	open	allowed	888	red88841835	red	R	0					food			nest	0	3
2014-07-15	Morning	open - pheromone allowed	open	allowed	888	red88841835	red	R	1	RR		1	0	food	0	1	nest	3	3
2014-07-15	Morning	open - pheromone allowed	open	allowed	888	red88841835	red	R	2	L*L	1	0	1	food	0	1	nest	1	0
2014-07-15	Morning	open - pheromone allowed	open	allowed	888	red88841835	red	R	3	RL		1	1	food	0	0	nest	0	0
2014-07-15	Morning	open - pheromone allowed	open	allowed	888	red88841835	red	R	4	RL		1	1	food	0	2	nest	1	0
2014-07-15	Morning	open - pheromone allowed	open	allowed	888	red88841835	red	R	5	RL		1	1	food			nest	0	0
2014-07-15	Morning	open - pheromone allowed	open	allowed	888	red88841835	red	R	6	L*L	1	0	1	food	0	1	nest	1
2014-07-15	Morning	open - pheromone allowed	open	allowed	888	red88841835	red	R	7	L*R	1	0	0	food	0	0	nest
2014-07-15	Morning	open - pheromone allowed	open	allowed	888	orange88841835	orange	R	0					food			nest
2014-07-15	Morning	open - pheromone allowed	open	allowed	888	orange88841835	orange	R	1	RR		1	0	food	0	0	nest	2	3
2014-07-15	Morning	open - pheromone allowed	open	allowed	888	orange88841835	orange	R	2	RL		1	1	food			nest	2
2014-07-15	Morning	open - pheromone allowed	open	allowed	888	orange88841835	orange	R	3	RL		1	1	food	0	0	nest	0
2014-07-15	Morning	open - pheromone allowed	open	allowed	888	orange88841835	orange	R	4	RL		1	1	food	1	0	nest
2014-07-15	Morning	open - pheromone allowed	open	allowed	888	orange88841835	orange	R	5					food			nest
2014-07-15	Morning	open - pheromone allowed	open	allowed	888	orange88841835	orange	R	6					food			nest
2014-07-15	Morning	open - pheromone allowed	open	allowed	888	orange88841835	orange	R	7					food			nest
2014-07-15	Morning	open - pheromone allowed	open	allowed	RGB8	goldRGB841835	gold	R	0					food			nest	0	0
2014-07-15	Morning	open - pheromone allowed	open	allowed	RGB8	goldRGB841835	gold	R	1	RR		1	0	food	0	1	nest	0	0
2014-07-15	Morning	open - pheromone allowed	open	allowed	RGB8	goldRGB841835	gold	R	2	RR		1	0	food	0	1	nest	0	0
2014-07-15	Morning	open - pheromone allowed	open	allowed	RGB8	goldRGB841835	gold	R	3	RL		1	1	food	0	0	nest	0
2014-07-15	Morning	open - pheromone allowed	open	allowed	RGB8	goldRGB841835	gold	R	4	RR		1	0	food	0	0	nest
2014-07-15	Morning	open - pheromone allowed	open	allowed	RGB8	goldRGB841835	gold	R	5	RR		1	0	food	0	0	nest	0
2014-07-15	Morning	open - pheromone allowed	open	allowed	RGB8	goldRGB841835	gold	R	6	RL		1	1	food	0	0	nest
2014-07-15	Morning	open - pheromone allowed	open	allowed	RGB8	goldRGB841835	gold	R	7	L*L	1	0	1	food	0	0	nest
2014-07-15	Morning	open - pheromone allowed	open	allowed	RGB8	yellowRGB841835	yellow	R	0					food			nest
2014-07-15	Morning	open - pheromone allowed	open	allowed	RGB8	yellowRGB841835	yellow	R	1					food			nest
2014-07-15	Morning	open - pheromone allowed	open	allowed	RGB8	yellowRGB841835	yellow	R	2					food			nest
2014-07-15	Morning	open - pheromone allowed	open	allowed	RGB8	yellowRGB841835	yellow	R	3					food			nest
2014-07-15	Morning	open - pheromone allowed	open	allowed	RGB8	yellowRGB841835	yellow	R	4					food			nest
2014-07-15	Morning	open - pheromone allowed	open	allowed	RGB8	yellowRGB841835	yellow	R	5					food			nest
2014-07-15	Morning	open - pheromone allowed	open	allowed	RGB8	yellowRGB841835	yellow	R	6					food			nest
2014-07-15	Morning	open - pheromone allowed	open	allowed	RGB8	yellowRGB841835	yellow	R	7					food			nest
2014-07-15	Morning	open - pheromone allowed	open	allowed	RGB8	greenRGB841835	green	R	0					food			nest	1
2014-07-15	Morning	open - pheromone allowed	open	allowed	RGB8	greenRGB841835	green	R	1	LR		0	0	food	0	0	nest	9	7
2014-07-15	Morning	open - pheromone allowed	open	allowed	RGB8	greenRGB841835	green	R	2	LR		0	0	food	0	0	nest	5	6
2014-07-15	Morning	open - pheromone allowed	open	allowed	RGB8	greenRGB841835	green	R	3	RR		1	0	food	0	0	nest		3
2014-07-15	Morning	open - pheromone allowed	open	allowed	RGB8	greenRGB841835	green	R	4	RL		1	1	food	1	0	nest
2014-07-15	Morning	open - pheromone allowed	open	allowed	RGB8	greenRGB841835	green	R	5	LL		0	1	food	0	0	nest	1	2
2014-07-15	Morning	open - pheromone allowed	open	allowed	RGB8	greenRGB841835	green	R	6	RR		1	0	food	0	0	nest	1	2
2014-07-15	Morning	open - pheromone allowed	open	allowed	RGB8	greenRGB841835	green	R	7	LL		0	1	food	0	0	nest
2014-07-15	Morning	open - pheromone allowed	open	allowed	RGB8	redRGB841835	red	R	0					food			nest	1
2014-07-15	Morning	open - pheromone allowed	open	allowed	RGB8	redRGB841835	red	R	1	L*R	1	0	0	food	0	0	nest	0
2014-07-15	Morning	open - pheromone allowed	open	allowed	RGB8	redRGB841835	red	R	2	RL		1	1	food	0	0	nest	0	0
2014-07-15	Morning	open - pheromone allowed	open	allowed	RGB8	redRGB841835	red	R	3	L*L	1	0	1	food	0	0	nest	0	0
2014-07-15	Morning	open - pheromone allowed	open	allowed	RGB8	redRGB841835	red	R	4	L*L	1	0	1	food	0	0	nest	0
2014-07-15	Morning	open - pheromone allowed	open	allowed	RGB8	redRGB841835	red	R	5	RL		1	1	food	0	2	nest	0	0
2014-07-15	Morning	open - pheromone allowed	open	allowed	RGB8	redRGB841835	red	R	6	RL		1	1	food			nest	0	0
2014-07-15	Morning	open - pheromone allowed	open	allowed	RGB8	redRGB841835	red	R	7	RL		1	1	food	0	0	nest
2014-07-15	Morning	open - pheromone allowed	open	allowed	RGB8	orangeRGB841835	orange	R	0					food			nest
2014-07-15	Morning	open - pheromone allowed	open	allowed	RGB8	orangeRGB841835	orange	R	1	RL		1	1	food	0	0	nest	1
2014-07-15	Morning	open - pheromone allowed	open	allowed	RGB8	orangeRGB841835	orange	R	2	RL		1	1	food	0	0	nest	0	0
2014-07-15	Morning	open - pheromone allowed	open	allowed	RGB8	orangeRGB841835	orange	R	3	LL		0	1	food	0	0	nest	0	0
2014-07-15	Morning	open - pheromone allowed	open	allowed	RGB8	orangeRGB841835	orange	R	4	LR		0	0	food	0	0	nest
2014-07-15	Morning	open - pheromone allowed	open	allowed	RGB8	orangeRGB841835	orange	R	5	RR		1	0	food	0	1	nest	0	0
2014-07-15	Morning	open - pheromone allowed	open	allowed	RGB8	orangeRGB841835	orange	R	6	RL		1	1	food	1	0	nest	1	0
2014-07-15	Morning	open - pheromone allowed	open	allowed	RGB8	orangeRGB841835	orange	R	7	RL		1	1	food	0	0	nest
2014-07-16	Morning	open - pheromone allowed	open	allowed	RGB8	goldRGB841836	gold	L	0					food			nest
2014-07-16	Morning	open - pheromone allowed	open	allowed	RGB8	goldRGB841836	gold	L	1	RR		0	1	food	0	2	nest	3	2
2014-07-16	Morning	open - pheromone allowed	open	allowed	RGB8	goldRGB841836	gold	L	2	LR		1	1	food	0	0	nest	1
2014-07-16	Morning	open - pheromone allowed	open	allowed	RGB8	goldRGB841836	gold	L	3	R*L	1	0	0	food			nest	1	1
2014-07-16	Morning	open - pheromone allowed	open	allowed	RGB8	goldRGB841836	gold	L	4	LR		1	1	food	0	0	nest		1
2014-07-16	Morning	open - pheromone allowed	open	allowed	RGB8	goldRGB841836	gold	L	5	LR		1	1	food	0	2	nest	0	0
2014-07-16	Morning	open - pheromone allowed	open	allowed	RGB8	goldRGB841836	gold	L	6	R*R	1	0	1	food	0	0	nest	0
2014-07-16	Morning	open - pheromone allowed	open	allowed	RGB8	goldRGB841836	gold	L	7	R*R	1	0	1	food	0	0	nest
2014-07-16	Morning	open - pheromone allowed	open	allowed	RGB8	yellowRGB841836	yellow	L	0					food			nest	0
2014-07-16	Morning	open - pheromone allowed	open	allowed	RGB8	yellowRGB841836	yellow	L	1	LR		1	1	food	0	0	nest	0	0
2014-07-16	Morning	open - pheromone allowed	open	allowed	RGB8	yellowRGB841836	yellow	L	2	LL		1	0	food	0	0	nest	0	0
2014-07-16	Morning	open - pheromone allowed	open	allowed	RGB8	yellowRGB841836	yellow	L	3	LR		1	1	food	0	0	nest	0	0
2014-07-16	Morning	open - pheromone allowed	open	allowed	RGB8	yellowRGB841836	yellow	L	4	LR		1	1	food	0	0	nest	0	0
2014-07-16	Morning	open - pheromone allowed	open	allowed	RGB8	yellowRGB841836	yellow	L	5	LR		1	1	food	0	1	nest	1	0
2014-07-16	Morning	open - pheromone allowed	open	allowed	RGB8	yellowRGB841836	yellow	L	6	LR		1	1	food	0	2	nest	1	1
2014-07-16	Morning	open - pheromone allowed	open	allowed	RGB8	yellowRGB841836	yellow	L	7	LL		1	0	food	0	1	nest
2014-07-16	Morning	open - pheromone allowed	open	allowed	RGB8	greenRGB841836	green	L	0					food			nest
2014-07-16	Morning	open - pheromone allowed	open	allowed	RGB8	greenRGB841836	green	L	1	LR		1	1	food	1	1	nest	1	2
2014-07-16	Morning	open - pheromone allowed	open	allowed	RGB8	greenRGB841836	green	L	2	R*R	1	0	1	food	0	0	nest	0	0
2014-07-16	Morning	open - pheromone allowed	open	allowed	RGB8	greenRGB841836	green	L	3	LL		1	0	food	0	1	nest	0
2014-07-16	Morning	open - pheromone allowed	open	allowed	RGB8	greenRGB841836	green	L	4	LL		1	0	food	2	1	nest	0	0
2014-07-16	Morning	open - pheromone allowed	open	allowed	RGB8	greenRGB841836	green	L	5	LL		1	0	food	0	2	nest	0
2014-07-16	Morning	open - pheromone allowed	open	allowed	RGB8	greenRGB841836	green	L	6	LL		1	0	food	0	0	nest	0	0
2014-07-16	Morning	open - pheromone allowed	open	allowed	RGB8	greenRGB841836	green	L	7	LR		1	1	food	0	0	nest
2014-07-16	Morning	open - pheromone allowed	open	allowed	RGB8	redRGB841836	red	L	0					food			nest
2014-07-16	Morning	open - pheromone allowed	open	allowed	RGB8	redRGB841836	red	L	1	LR		1	1	food	3	2	nest	0	0
2014-07-16	Morning	open - pheromone allowed	open	allowed	RGB8	redRGB841836	red	L	2	LR		1	1	food	1	1	nest	0	0
2014-07-16	Morning	open - pheromone allowed	open	allowed	RGB8	redRGB841836	red	L	3	LR		1	1	food	0	0	nest	1
2014-07-16	Morning	open - pheromone allowed	open	allowed	RGB8	redRGB841836	red	L	4	LR		1	1	food	0	1	nest
2014-07-16	Morning	open - pheromone allowed	open	allowed	RGB8	redRGB841836	red	L	5	LR		1	1	food	1	0	nest	0	0
2014-07-16	Morning	open - pheromone allowed	open	allowed	RGB8	redRGB841836	red	L	6	LR		1	1	food	0	0	nest	0	0
2014-07-16	Morning	open - pheromone allowed	open	allowed	RGB8	redRGB841836	red	L	7	R*R	1	0	1	food	1	0	nest
2014-07-16	Morning	open - pheromone allowed	open	allowed	RGB8	orangeRGB841836	orange	L	0					food			nest
2014-07-16	Morning	open - pheromone allowed	open	allowed	RGB8	orangeRGB841836	orange	L	1	LL		1	0	food	0	2	nest	3	2
2014-07-16	Morning	open - pheromone allowed	open	allowed	RGB8	orangeRGB841836	orange	L	2	LR		1	1	food	0	0	nest	1
2014-07-16	Morning	open - pheromone allowed	open	allowed	RGB8	orangeRGB841836	orange	L	3	LR		1	1	food			nest	1	1
2014-07-16	Morning	open - pheromone allowed	open	allowed	RGB8	orangeRGB841836	orange	L	4	LR		1	1	food	0	0	nest		1
2014-07-16	Morning	open - pheromone allowed	open	allowed	RGB8	orangeRGB841836	orange	L	5	LR		1	1	food	0	2	nest	0	0
2014-07-16	Morning	open - pheromone allowed	open	allowed	RGB8	orangeRGB841836	orange	L	6	LR		1	1	food	0	0	nest	0
2014-07-16	Morning	open - pheromone allowed	open	allowed	RGB8	orangeRGB841836	orange	L	7	LR		1	1	food	0	0	nest
2014-07-16	Morning	open - pheromone allowed	open	allowed	888split	gold888split41836	gold	R	0					food			nest
2014-07-16	Morning	open - pheromone allowed	open	allowed	888split	gold888split41836	gold	R	1	RR		1	0	food	0	1	nest	4
2014-07-16	Morning	open - pheromone allowed	open	allowed	888split	gold888split41836	gold	R	2	RL		1	1	food	0	2	nest		4
2014-07-16	Morning	open - pheromone allowed	open	allowed	888split	gold888split41836	gold	R	3	RL		1	1	food	0	1	nest	0	2
2014-07-16	Morning	open - pheromone allowed	open	allowed	888split	gold888split41836	gold	R	4	RL		1	1	food	0	1	nest	1	2
2014-07-16	Morning	open - pheromone allowed	open	allowed	888split	gold888split41836	gold	R	5	RL		1	1	food	1	1	nest	0	2
2014-07-16	Morning	open - pheromone allowed	open	allowed	888split	gold888split41836	gold	R	6	RL		1	1	food	0	0	nest	0	0
2014-07-16	Morning	open - pheromone allowed	open	allowed	888split	gold888split41836	gold	R	7	RR		1	0	food	2	2	nest
2014-07-16	Morning	open - pheromone allowed	open	allowed	888split	yellow888split41836	yellow	R	0					food			nest
2014-07-16	Morning	open - pheromone allowed	open	allowed	888split	yellow888split41836	yellow	R	1	RR		1	0	food	0	0	nest	2
2014-07-16	Morning	open - pheromone allowed	open	allowed	888split	yellow888split41836	yellow	R	2	L*R	1	0	0	food	0	0	nest	0	2
2014-07-16	Morning	open - pheromone allowed	open	allowed	888split	yellow888split41836	yellow	R	3	RR		1	0	food	0	0	nest
2014-07-16	Morning	open - pheromone allowed	open	allowed	888split	yellow888split41836	yellow	R	4	RL		1	1	food	0	0	nest	0	0
2014-07-16	Morning	open - pheromone allowed	open	allowed	888split	yellow888split41836	yellow	R	5	RL		1	1	food	0	0	nest	0	1
2014-07-16	Morning	open - pheromone allowed	open	allowed	888split	yellow888split41836	yellow	R	6	RL		1	1	food	0	1	nest	0
2014-07-16	Morning	open - pheromone allowed	open	allowed	888split	yellow888split41836	yellow	R	7	RL		1	1	food	0	0	nest
2014-07-16	Morning	open - pheromone allowed	open	allowed	888split	green888split41836	green	R	0					food			nest	2
2014-07-16	Morning	open - pheromone allowed	open	allowed	888split	green888split41836	green	R	1	RL		1	1	food	1	1	nest	0
2014-07-16	Morning	open - pheromone allowed	open	allowed	888split	green888split41836	green	R	2	LL		0	1	food	0	0	nest
2014-07-16	Morning	open - pheromone allowed	open	allowed	888split	green888split41836	green	R	3					food			nest
2014-07-16	Morning	open - pheromone allowed	open	allowed	888split	green888split41836	green	R	4					food			nest
2014-07-16	Morning	open - pheromone allowed	open	allowed	888split	green888split41836	green	R	5					food			nest
2014-07-16	Morning	open - pheromone allowed	open	allowed	888split	green888split41836	green	R	6					food			nest
2014-07-16	Morning	open - pheromone allowed	open	allowed	888split	green888split41836	green	R	7					food			nest
2014-07-16	Morning	open - pheromone allowed	open	allowed	888split	red888split41836	red	R	0					food			nest
2014-07-16	Morning	open - pheromone allowed	open	allowed	888split	red888split41836	red	R	1	RR		1	0	food	0	0	nest	0	2
2014-07-16	Morning	open - pheromone allowed	open	allowed	888split	red888split41836	red	R	2	LR		0	0	food	0	0	nest	0	0
2014-07-16	Morning	open - pheromone allowed	open	allowed	888split	red888split41836	red	R	3	RL		1	1	food	0	0	nest	0	0
2014-07-16	Morning	open - pheromone allowed	open	allowed	888split	red888split41836	red	R	4	RR		1	0	food	0	0	nest	0	0
2014-07-16	Morning	open - pheromone allowed	open	allowed	888split	red888split41836	red	R	5	RL		1	1	food	0	0	nest	0	0
2014-07-16	Morning	open - pheromone allowed	open	allowed	888split	red888split41836	red	R	6	RL		1	1	food	0	0	nest
2014-07-16	Morning	open - pheromone allowed	open	allowed	888split	red888split41836	red	R	7	L*L	1	0	1	food	0	1	nest
2014-07-16	Morning	open - pheromone allowed	open	allowed	888split	orange888split41836	orange	R	0					food			nest	0
2014-07-16	Morning	open - pheromone allowed	open	allowed	888split	orange888split41836	orange	R	1	LL		0	1	food	0	0	nest	0
2014-07-16	Morning	open - pheromone allowed	open	allowed	888split	orange888split41836	orange	R	2	R*L	1	1	1	food	0	0	nest	0	3
2014-07-16	Morning	open - pheromone allowed	open	allowed	888split	orange888split41836	orange	R	3	RR		1	0	food	0	2	nest	3	3
2014-07-16	Morning	open - pheromone allowed	open	allowed	888split	orange888split41836	orange	R	4	RL		1	1	food	0	0	nest	0	0
2014-07-16	Morning	open - pheromone allowed	open	allowed	888split	orange888split41836	orange	R	5	RL		1	1	food	0	0	nest	0	0
2014-07-16	Morning	open - pheromone allowed	open	allowed	888split	orange888split41836	orange	R	6	RL		1	1	food	0	0	nest	1	0
2014-07-16	Morning	open - pheromone allowed	open	allowed	888split	orange888split41836	orange	R	7	RR		1	0	food	0	0	nest
2014-07-17	Morning	open - pheromone allowed	open	allowed	12	gold1241837	gold	R	0					food			nest	0	0
2014-07-17	Morning	open - pheromone allowed	open	allowed	12	gold1241837	gold	R	1	LL		0	1	food	4	0	nest	2	2
2014-07-17	Morning	open - pheromone allowed	open	allowed	12	gold1241837	gold	R	2	L*L	1	0	1	food	0	0	nest
2014-07-17	Morning	open - pheromone allowed	open	allowed	12	gold1241837	gold	R	3	RL		1	1	food			nest	2	0
2014-07-17	Morning	open - pheromone allowed	open	allowed	12	gold1241837	gold	R	4	L*L	1	0	1	food	0	0	nest	1	0
2014-07-17	Morning	open - pheromone allowed	open	allowed	12	gold1241837	gold	R	5	RL		1	1	food	0	0	nest
2014-07-17	Morning	open - pheromone allowed	open	allowed	12	gold1241837	gold	R	6	RL		1	1	food	1	0	nest	0	0
2014-07-17	Morning	open - pheromone allowed	open	allowed	12	gold1241837	gold	R	7	L*R	1	0	0	food	0	0	nest
2014-07-17	Morning	open - pheromone allowed	open	allowed	12	yellow1241837	yellow	R	0					food			nest
2014-07-17	Morning	open - pheromone allowed	open	allowed	12	yellow1241837	yellow	R	1	LL		0	1	food	0	0	nest
2014-07-17	Morning	open - pheromone allowed	open	allowed	12	yellow1241837	yellow	R	2	LL		0	1	food	1	0	nest	2	3
2014-07-17	Morning	open - pheromone allowed	open	allowed	12	yellow1241837	yellow	R	3	LR		0	0	food	0	0	nest	2	2
2014-07-17	Morning	open - pheromone allowed	open	allowed	12	yellow1241837	yellow	R	4	RL		1	1	food			nest	0	1
2014-07-17	Morning	open - pheromone allowed	open	allowed	12	yellow1241837	yellow	R	5	RL		1	1	food	0	0	nest	0	0
2014-07-17	Morning	open - pheromone allowed	open	allowed	12	yellow1241837	yellow	R	6	RL		1	1	food	1	1	nest	0	0
2014-07-17	Morning	open - pheromone allowed	open	allowed	12	yellow1241837	yellow	R	7	RL		1	1	food	2	2	nest
2014-07-17	Morning	open - pheromone allowed	open	allowed	12	green1241837	green	R	0					food			nest	0
2014-07-17	Morning	open - pheromone allowed	open	allowed	12	green1241837	green	R	1	LR		0	0	food			nest	2	2
2014-07-17	Morning	open - pheromone allowed	open	allowed	12	green1241837	green	R	2	RL		1	1	food	0	0	nest
2014-07-17	Morning	open - pheromone allowed	open	allowed	12	green1241837	green	R	3	RL		1	1	food	0	0	nest	1	0
2014-07-17	Morning	open - pheromone allowed	open	allowed	12	green1241837	green	R	4	RL		1	1	food	0	0	nest
2014-07-17	Morning	open - pheromone allowed	open	allowed	12	green1241837	green	R	5	RL		1	1	food	0	1	nest	0	0
2014-07-17	Morning	open - pheromone allowed	open	allowed	12	green1241837	green	R	6	RL		1	1	food	0	0	nest	0	0
2014-07-17	Morning	open - pheromone allowed	open	allowed	12	green1241837	green	R	7	RR		1	0	food	0	0	nest
2014-07-17	Morning	open - pheromone allowed	open	allowed	12	red1241837	red	R	0					food			nest	0
2014-07-17	Morning	open - pheromone allowed	open	allowed	12	red1241837	red	R	1	R*R	1	1	0	food	0	0	nest	0
2014-07-17	Morning	open - pheromone allowed	open	allowed	12	red1241837	red	R	2	RL		1	1	food	1	0	nest	1
2014-07-17	Morning	open - pheromone allowed	open	allowed	12	red1241837	red	R	3	RL		1	1	food	1	1	nest	1	3
2014-07-17	Morning	open - pheromone allowed	open	allowed	12	red1241837	red	R	4	LR		0	0	food	1	0	nest	2	1
2014-07-17	Morning	open - pheromone allowed	open	allowed	12	red1241837	red	R	5	RL		1	1	food	0	0	nest	0	0
2014-07-17	Morning	open - pheromone allowed	open	allowed	12	red1241837	red	R	6	RL		1	1	food	0	2	nest	0	1
2014-07-17	Morning	open - pheromone allowed	open	allowed	12	red1241837	red	R	7	RL		1	1	food	0	0	nest
2014-07-17	Morning	open - pheromone allowed	open	allowed	12	orange1241837	orange	R	0					food			nest	1	0
2014-07-17	Morning	open - pheromone allowed	open	allowed	12	orange1241837	orange	R	1	RL		1	1	food	3	2	nest	1	3
2014-07-17	Morning	open - pheromone allowed	open	allowed	12	orange1241837	orange	R	2	RL		1	1	food	0	0	nest	1	2
2014-07-17	Morning	open - pheromone allowed	open	allowed	12	orange1241837	orange	R	3	L*L	1	0	1	food	0	1	nest	1
2014-07-17	Morning	open - pheromone allowed	open	allowed	12	orange1241837	orange	R	4	RL		1	1	food	1	2	nest	1
2014-07-17	Morning	open - pheromone allowed	open	allowed	12	orange1241837	orange	R	5	RL		1	1	food	0	0	nest	0	0
2014-07-17	Morning	open - pheromone allowed	open	allowed	12	orange1241837	orange	R	6	L*L	1	0	1	food	0	0	nest	0	0
2014-07-17	Morning	open - pheromone allowed	open	allowed	12	orange1241837	orange	R	7	RL		1	1	food	2	1	nest
2014-07-17	Morning	open - pheromone allowed	open	allowed	3	gold341837	gold	L	0					food			nest	0	0
2014-07-17	Morning	open - pheromone allowed	open	allowed	3	gold341837	gold	L	1	LL		1	0	food	0	0	nest	1	3
2014-07-17	Morning	open - pheromone allowed	open	allowed	3	gold341837	gold	L	2	LR		1	1	food	0	0	nest	1	0
2014-07-17	Morning	open - pheromone allowed	open	allowed	3	gold341837	gold	L	3	LR		1	1	food	0	0	nest	0	0
2014-07-17	Morning	open - pheromone allowed	open	allowed	3	gold341837	gold	L	4	LL		1	0	food	0	0	nest	2	0
2014-07-17	Morning	open - pheromone allowed	open	allowed	3	gold341837	gold	L	5	LR		1	1	food	0	0	nest	0	0
2014-07-17	Morning	open - pheromone allowed	open	allowed	3	gold341837	gold	L	6	LR		1	1	food	0	0	nest	0	1
2014-07-17	Morning	open - pheromone allowed	open	allowed	3	gold341837	gold	L	7	R*R	1	0	1	food	0	0	nest
2014-07-17	Morning	open - pheromone allowed	open	allowed	3	yellow341837	yellow	L	0					food			nest	0	0
2014-07-17	Morning	open - pheromone allowed	open	allowed	3	yellow341837	yellow	L	1	LR		1	1	food	0	0	nest	2	2
2014-07-17	Morning	open - pheromone allowed	open	allowed	3	yellow341837	yellow	L	2	LR		1	1	food	2	0	nest	1	0
2014-07-17	Morning	open - pheromone allowed	open	allowed	3	yellow341837	yellow	L	3	LR		1	1	food	0	0	nest	3	1
2014-07-17	Morning	open - pheromone allowed	open	allowed	3	yellow341837	yellow	L	4	LR		1	1	food	0	0	nest	1	0
2014-07-17	Morning	open - pheromone allowed	open	allowed	3	yellow341837	yellow	L	5	LR		1	1	food	2	0	nest	0	0
2014-07-17	Morning	open - pheromone allowed	open	allowed	3	yellow341837	yellow	L	6					food	0	0	nest	2	0
2014-07-17	Morning	open - pheromone allowed	open	allowed	3	yellow341837	yellow	L	7	RL		0	0	food	0	3	nest
2014-07-17	Morning	open - pheromone allowed	open	allowed	3	green341837	green	L	0					food			nest		0
2014-07-17	Morning	open - pheromone allowed	open	allowed	3	green341837	green	L	1	R*R	1	0	1	food	3	2	nest	2	3
2014-07-17	Morning	open - pheromone allowed	open	allowed	3	green341837	green	L	2	LR		1	1	food	0	0	nest	2
2014-07-17	Morning	open - pheromone allowed	open	allowed	3	green341837	green	L	3	LR		1	1	food	0	0	nest	2	0
2014-07-17	Morning	open - pheromone allowed	open	allowed	3	green341837	green	L	4	LL		1	0	food			nest	1	0
2014-07-17	Morning	open - pheromone allowed	open	allowed	3	green341837	green	L	5	LR		1	1	food	0	1	nest	2	0
2014-07-17	Morning	open - pheromone allowed	open	allowed	3	green341837	green	L	6	LR		1	1	food	0	3	nest	1	0
2014-07-17	Morning	open - pheromone allowed	open	allowed	3	green341837	green	L	7	RR		0	1	food	0	0	nest
2014-07-17	Morning	open - pheromone allowed	open	allowed	3	red341837	red	L	0					food			nest		0
2014-07-17	Morning	open - pheromone allowed	open	allowed	3	red341837	red	L	1	LR		1	1	food	0	0	nest	2	3
2014-07-17	Morning	open - pheromone allowed	open	allowed	3	red341837	red	L	2	LR		1	1	food	0	0	nest	1	0
2014-07-17	Morning	open - pheromone allowed	open	allowed	3	red341837	red	L	3	LL		1	0	food	0	0	nest	3	1
2014-07-17	Morning	open - pheromone allowed	open	allowed	3	red341837	red	L	4	LR		1	1	food	0	0	nest	1	0
2014-07-17	Morning	open - pheromone allowed	open	allowed	3	red341837	red	L	5	LR		1	1	food	0	0	nest	2	2
2014-07-17	Morning	open - pheromone allowed	open	allowed	3	red341837	red	L	6	RL		0	0	food	0	0	nest	2	3
2014-07-17	Morning	open - pheromone allowed	open	allowed	3	red341837	red	L	7	R*L	1	0	0	food	0	1	nest
2014-07-17	Morning	open - pheromone allowed	open	allowed	3	orange341837	orange	L	0					food			nest	0	0
2014-07-17	Morning	open - pheromone allowed	open	allowed	3	orange341837	orange	L	1	LL		1	0	food	0	0	nest	1	3
2014-07-17	Morning	open - pheromone allowed	open	allowed	3	orange341837	orange	L	2	LR		1	1	food	0	0	nest	1	0
2014-07-17	Morning	open - pheromone allowed	open	allowed	3	orange341837	orange	L	3	LR		1	1	food	0	0	nest	0	0
2014-07-17	Morning	open - pheromone allowed	open	allowed	3	orange341837	orange	L	4	RR		0	1	food	0	0	nest	2	0
2014-07-17	Morning	open - pheromone allowed	open	allowed	3	orange341837	orange	L	5	LR		1	1	food	0	0	nest	0	0
2014-07-17	Morning	open - pheromone allowed	open	allowed	3	orange341837	orange	L	6	LR		1	1	food	0	0	nest	0	1
2014-07-17	Morning	open - pheromone allowed	open	allowed	3	orange341837	orange	L	7	LL		1	0	food	0	0	nest
2014-07-18	Morning	open - pheromone allowed	open	allowed	6	gold641838	gold	L	0					food			nest
2014-07-18	Morning	open - pheromone allowed	open	allowed	6	gold641838	gold	L	1	LL		1	0	food	3	2	nest	1	4
2014-07-18	Morning	open - pheromone allowed	open	allowed	6	gold641838	gold	L	2	LR		1	1	food	3	2	nest	2	1
2014-07-18	Morning	open - pheromone allowed	open	allowed	6	gold641838	gold	L	3	LR		1	1	food	2	1	nest	0
2014-07-18	Morning	open - pheromone allowed	open	allowed	6	gold641838	gold	L	4	LR		1	1	food	2	3	nest	3	0
2014-07-18	Morning	open - pheromone allowed	open	allowed	6	gold641838	gold	L	5	LR		1	1	food	0	0	nest	0	0
2014-07-18	Morning	open - pheromone allowed	open	allowed	6	gold641838	gold	L	6	LR		1	1	food	0	0	nest	0	0
2014-07-18	Morning	open - pheromone allowed	open	allowed	6	gold641838	gold	L	7	RR		0	1	food	0	0	nest
2014-07-18	Morning	open - pheromone allowed	open	allowed	6	yellow641838	yellow	L	0					food			nest	1
2014-07-18	Morning	open - pheromone allowed	open	allowed	6	yellow641838	yellow	L	1	LL		1	0	food	0	0	nest	3	3
2014-07-18	Morning	open - pheromone allowed	open	allowed	6	yellow641838	yellow	L	2	LL		1	0	food	0	0	nest	1	1
2014-07-18	Morning	open - pheromone allowed	open	allowed	6	yellow641838	yellow	L	3	LR		1	1	food	0	0	nest	0	0
2014-07-18	Morning	open - pheromone allowed	open	allowed	6	yellow641838	yellow	L	4	LR		1	1	food	0	0	nest	0	0
2014-07-18	Morning	open - pheromone allowed	open	allowed	6	yellow641838	yellow	L	5	LR		1	1	food	0	0	nest	1	0
2014-07-18	Morning	open - pheromone allowed	open	allowed	6	yellow641838	yellow	L	6	LR		1	1	food	0	0	nest	0	0
2014-07-18	Morning	open - pheromone allowed	open	allowed	6	yellow641838	yellow	L	7	LR		1	1	food	0	0	nest
2014-07-18	Morning	open - pheromone allowed	open	allowed	6	green641838	green	L	0					food			nest
2014-07-18	Morning	open - pheromone allowed	open	allowed	6	green641838	green	L	1	LL		1	0	food			nest
2014-07-18	Morning	open - pheromone allowed	open	allowed	6	green641838	green	L	2	LL		1	0	food	0	0	nest	0	0
2014-07-18	Morning	open - pheromone allowed	open	allowed	6	green641838	green	L	3	LR		1	1	food			nest	1
2014-07-18	Morning	open - pheromone allowed	open	allowed	6	green641838	green	L	4	LR		1	1	food	0	1	nest	0	0
2014-07-18	Morning	open - pheromone allowed	open	allowed	6	green641838	green	L	5	LR		1	1	food	0	1	nest	1	0
2014-07-18	Morning	open - pheromone allowed	open	allowed	6	green641838	green	L	6	LL		1	0	food	0	0	nest
2014-07-18	Morning	open - pheromone allowed	open	allowed	6	green641838	green	L	7	LR		1	1	food	1	0	nest
2014-07-18	Morning	open - pheromone allowed	open	allowed	6	red641838	red	L	0					food			nest
2014-07-18	Morning	open - pheromone allowed	open	allowed	6	red641838	red	L	1	LL		1	0	food	0	0	nest	2	0
2014-07-18	Morning	open - pheromone allowed	open	allowed	6	red641838	red	L	2	LR		1	1	food	3	2	nest	3	4
2014-07-18	Morning	open - pheromone allowed	open	allowed	6	red641838	red	L	3	LR		1	1	food	1	0	nest	0	1
2014-07-18	Morning	open - pheromone allowed	open	allowed	6	red641838	red	L	4	LR		1	1	food	0	2	nest	0	0
2014-07-18	Morning	open - pheromone allowed	open	allowed	6	red641838	red	L	5	RR		0	1	food	0	0	nest	0	0
2014-07-18	Morning	open - pheromone allowed	open	allowed	6	red641838	red	L	6	LR		1	1	food			nest	0	0
2014-07-18	Morning	open - pheromone allowed	open	allowed	6	red641838	red	L	7	RL		0	0	food	1	0	nest
2014-07-18	Morning	open - pheromone allowed	open	allowed	6	orange641838	orange	L	0					food			nest
2014-07-18	Morning	open - pheromone allowed	open	allowed	6	orange641838	orange	L	1	LR		1	1	food	0	0	nest	2
2014-07-18	Morning	open - pheromone allowed	open	allowed	6	orange641838	orange	L	2	LL		1	0	food	2	2	nest	0	3
2014-07-18	Morning	open - pheromone allowed	open	allowed	6	orange641838	orange	L	3	LR		1	1	food	2	0	nest
2014-07-18	Morning	open - pheromone allowed	open	allowed	6	orange641838	orange	L	4	LR		1	1	food	0	0	nest
2014-07-18	Morning	open - pheromone allowed	open	allowed	6	orange641838	orange	L	5	LR		1	1	food	3	3	nest	1
2014-07-18	Morning	open - pheromone allowed	open	allowed	6	orange641838	orange	L	6	LR		1	1	food	1	2	nest	3	0
2014-07-18	Morning	open - pheromone allowed	open	allowed	6	orange641838	orange	L	7	LR		1	1	food	1	0	nest
2014-07-22	Morning	open - pheromone allowed	open	allowed	888	gold88841842	gold	L	0					food			nest	0	2
2014-07-22	Morning	open - pheromone allowed	open	allowed	888	gold88841842	gold	L	1	RR		0	1	food	0	0	nest	4
2014-07-22	Morning	open - pheromone allowed	open	allowed	888	gold88841842	gold	L	2	LR		1	1	food	1	2	nest	3	2
2014-07-22	Morning	open - pheromone allowed	open	allowed	888	gold88841842	gold	L	3	LR		1	1	food	0	0	nest	4	3
2014-07-22	Morning	open - pheromone allowed	open	allowed	888	gold88841842	gold	L	4	R*R	1	0	1	food			nest	3	6
2014-07-22	Morning	open - pheromone allowed	open	allowed	888	gold88841842	gold	L	5	R*R	1	0	1	food			nest	1	3
2014-07-22	Morning	open - pheromone allowed	open	allowed	888	gold88841842	gold	L	6	LR		1	1	food			nest	1	0
2014-07-22	Morning	open - pheromone allowed	open	allowed	888	gold88841842	gold	L	7	RR		0	1	food	1	1	nest
2014-07-22	Morning	open - pheromone allowed	open	allowed	888	yellow88841842	yellow	L	0					food			nest
2014-07-22	Morning	open - pheromone allowed	open	allowed	888	yellow88841842	yellow	L	1	LR		1	1	food	0	0	nest
2014-07-22	Morning	open - pheromone allowed	open	allowed	888	yellow88841842	yellow	L	2	LR		1	1	food	0	1	nest	0	0
2014-07-22	Morning	open - pheromone allowed	open	allowed	888	yellow88841842	yellow	L	3	R*R	1	0	1	food	0	2	nest	1	0
2014-07-22	Morning	open - pheromone allowed	open	allowed	888	yellow88841842	yellow	L	4	LR		1	1	food	0	0	nest
2014-07-22	Morning	open - pheromone allowed	open	allowed	888	yellow88841842	yellow	L	5	LR		1	1	food	0	0	nest
2014-07-22	Morning	open - pheromone allowed	open	allowed	888	yellow88841842	yellow	L	6	LR		1	1	food	0	0	nest
2014-07-22	Morning	open - pheromone allowed	open	allowed	888	yellow88841842	yellow	L	7	LR		1	1	food	0	0	nest
2014-07-22	Morning	open - pheromone allowed	open	allowed	888	green88841842	green	L	0					food			nest
2014-07-22	Morning	open - pheromone allowed	open	allowed	888	green88841842	green	L	1					food			nest
2014-07-22	Morning	open - pheromone allowed	open	allowed	888	green88841842	green	L	2					food			nest
2014-07-22	Morning	open - pheromone allowed	open	allowed	888	green88841842	green	L	3					food			nest
2014-07-22	Morning	open - pheromone allowed	open	allowed	888	green88841842	green	L	4					food			nest
2014-07-22	Morning	open - pheromone allowed	open	allowed	888	green88841842	green	L	5					food			nest
2014-07-22	Morning	open - pheromone allowed	open	allowed	888	green88841842	green	L	6					food			nest
2014-07-22	Morning	open - pheromone allowed	open	allowed	888	green88841842	green	L	7					food			nest
2014-07-22	Morning	open - pheromone allowed	open	allowed	888	red88841842	red	L	0					food			nest
2014-07-22	Morning	open - pheromone allowed	open	allowed	888	red88841842	red	L	1	L*L	1	1	0	food	0	0	nest		0
2014-07-22	Morning	open - pheromone allowed	open	allowed	888	red88841842	red	L	2	LR		1	1	food			nest		3
2014-07-22	Morning	open - pheromone allowed	open	allowed	888	red88841842	red	L	3	LR		1	1	food	0	0	nest	0	1
2014-07-22	Morning	open - pheromone allowed	open	allowed	888	red88841842	red	L	4					food			nest	0	0
2014-07-22	Morning	open - pheromone allowed	open	allowed	888	red88841842	red	L	5					food			nest
2014-07-22	Morning	open - pheromone allowed	open	allowed	888	red88841842	red	L	6					food			nest
2014-07-22	Morning	open - pheromone allowed	open	allowed	888	red88841842	red	L	7					food			nest
2014-07-22	Morning	open - pheromone allowed	open	allowed	888	orange88841842	orange	L	0					food			nest
2014-07-22	Morning	open - pheromone allowed	open	allowed	888	orange88841842	orange	L	1	RR		0	1	food	0	0	nest		4
2014-07-22	Morning	open - pheromone allowed	open	allowed	888	orange88841842	orange	L	2	LR		1	1	food	4	5	nest	4
2014-07-22	Morning	open - pheromone allowed	open	allowed	888	orange88841842	orange	L	3	LR		1	1	food	0	1	nest	0	0
2014-07-22	Morning	open - pheromone allowed	open	allowed	888	orange88841842	orange	L	4	R*R	1	0	1	food	0	1	nest	1	0
2014-07-22	Morning	open - pheromone allowed	open	allowed	888	orange88841842	orange	L	5	R*R	1	0	1	food			nest
2014-07-22	Morning	open - pheromone allowed	open	allowed	888	orange88841842	orange	L	6	LR		1	1	food	0	0	nest	0	0
2014-07-22	Morning	open - pheromone allowed	open	allowed	888	orange88841842	orange	L	7	RR		0	1	food	0	0	nest	0	3
2014-07-22	Morning	open - pheromone allowed	open	allowed	11	gold1141842	gold	R	0					food			nest
2014-07-22	Morning	open - pheromone allowed	open	allowed	11	gold1141842	gold	R	1	LL		0	1	food	2	1	nest	0	2
2014-07-22	Morning	open - pheromone allowed	open	allowed	11	gold1141842	gold	R	2	LR		0	0	food	0	1	nest	1	3
2014-07-22	Morning	open - pheromone allowed	open	allowed	11	gold1141842	gold	R	3	RL		1	1	food	0	0	nest		3
2014-07-22	Morning	open - pheromone allowed	open	allowed	11	gold1141842	gold	R	4	RL		1	1	food	0	0	nest	1	0
2014-07-22	Morning	open - pheromone allowed	open	allowed	11	gold1141842	gold	R	5	RL		1	1	food	0	1	nest	0	0
2014-07-22	Morning	open - pheromone allowed	open	allowed	11	gold1141842	gold	R	6	RL		1	1	food	0	0	nest	0	0
2014-07-22	Morning	open - pheromone allowed	open	allowed	11	gold1141842	gold	R	7	LL		0	1	food	0	0	nest
2014-07-22	Morning	open - pheromone allowed	open	allowed	11	yellow1141842	yellow	R	0					food			nest
2014-07-22	Morning	open - pheromone allowed	open	allowed	11	yellow1141842	yellow	R	1	RL		1	1	food	1	1	nest	0	3
2014-07-22	Morning	open - pheromone allowed	open	allowed	11	yellow1141842	yellow	R	2	RR		1	0	food	2	2	nest	0	8
2014-07-22	Morning	open - pheromone allowed	open	allowed	11	yellow1141842	yellow	R	3	RR		1	0	food	4	0	nest	2	3
2014-07-22	Morning	open - pheromone allowed	open	allowed	11	yellow1141842	yellow	R	4	RL		1	1	food	0	2	nest
2014-07-22	Morning	open - pheromone allowed	open	allowed	11	yellow1141842	yellow	R	5	RL		1	1	food	0	0	nest
2014-07-22	Morning	open - pheromone allowed	open	allowed	11	yellow1141842	yellow	R	6	RL		1	1	food	0	2	nest	1	1
2014-07-22	Morning	open - pheromone allowed	open	allowed	11	yellow1141842	yellow	R	7	LR		0	0	food	2	1	nest
2014-07-22	Morning	open - pheromone allowed	open	allowed	11	green1141842	green	R	0					food			nest	1	0
2014-07-22	Morning	open - pheromone allowed	open	allowed	11	green1141842	green	R	1	R*L	1	1	1	food	0	0	nest	3	6
2014-07-22	Morning	open - pheromone allowed	open	allowed	11	green1141842	green	R	2	LL		0	1	food	0	0	nest	1	3
2014-07-22	Morning	open - pheromone allowed	open	allowed	11	green1141842	green	R	3	LL		0	1	food	0	0	nest		1
2014-07-22	Morning	open - pheromone allowed	open	allowed	11	green1141842	green	R	4	RL		1	1	food	0	0	nest	0	0
2014-07-22	Morning	open - pheromone allowed	open	allowed	11	green1141842	green	R	5	R*L	1	1	1	food	0	0	nest	0	1
2014-07-22	Morning	open - pheromone allowed	open	allowed	11	green1141842	green	R	6	L*L	1	0	1	food	0	0	nest	1	0
2014-07-22	Morning	open - pheromone allowed	open	allowed	11	green1141842	green	R	7	LL		0	1	food	0	0	nest
2014-07-22	Morning	open - pheromone allowed	open	allowed	11	red1141842	red	R	0					food			nest	0
2014-07-22	Morning	open - pheromone allowed	open	allowed	11	red1141842	red	R	1	RL		1	1	food	0	0	nest	1
2014-07-22	Morning	open - pheromone allowed	open	allowed	11	red1141842	red	R	2	LL		0	1	food	2	4	nest
2014-07-22	Morning	open - pheromone allowed	open	allowed	11	red1141842	red	R	3	L*R	1	0	0	food	0	1	nest
2014-07-22	Morning	open - pheromone allowed	open	allowed	11	red1141842	red	R	4	LL		0	1	food	2	2	nest	1	2
2014-07-22	Morning	open - pheromone allowed	open	allowed	11	red1141842	red	R	5	RL		1	1	food	0	0	nest	0	0
2014-07-22	Morning	open - pheromone allowed	open	allowed	11	red1141842	red	R	6	RL		1	1	food	0	0	nest	1	1
2014-07-22	Morning	open - pheromone allowed	open	allowed	11	red1141842	red	R	7	L*R	1	0	0	food		2	nest	0	0
2014-07-22	Morning	open - pheromone allowed	open	allowed	11	orange1141842	orange	R	0					food			nest
2014-07-22	Morning	open - pheromone allowed	open	allowed	11	orange1141842	orange	R	1	LR		0	0	food	0	0	nest
2014-07-22	Morning	open - pheromone allowed	open	allowed	11	orange1141842	orange	R	2	RR		1	0	food	0	0	nest	2	4
2014-07-22	Morning	open - pheromone allowed	open	allowed	11	orange1141842	orange	R	3	RL		1	1	food			nest	2	3
2014-07-22	Morning	open - pheromone allowed	open	allowed	11	orange1141842	orange	R	4	RL		1	1	food	0	1	nest	1	3
2014-07-22	Morning	open - pheromone allowed	open	allowed	11	orange1141842	orange	R	5	RL		1	1	food	0	0	nest	2	3
2014-07-22	Morning	open - pheromone allowed	open	allowed	11	orange1141842	orange	R	6	RL		1	1	food	0	1	nest	0	0
2014-07-22	Morning	open - pheromone allowed	open	allowed	11	orange1141842	orange	R	7	R*L	1	1	1	food	0	0	nest
2014-07-22	Morning	open - pheromone allowed	open	allowed	11	gold1141842	gold	L	0					food			nest	1
2014-07-22	Morning	open - pheromone allowed	open	allowed	11	gold1141842	gold	L	1	LL		1	0	food	1	0	nest	1	0
2014-07-22	Morning	open - pheromone allowed	open	allowed	11	gold1141842	gold	L	2	LR		1	1	food	2	0	nest	0	0
2014-07-22	Morning	open - pheromone allowed	open	allowed	11	gold1141842	gold	L	3	LR		1	1	food	1	0	nest	0	0
2014-07-22	Morning	open - pheromone allowed	open	allowed	11	gold1141842	gold	L	4	R*R	1	0	1	food			nest	1	0
2014-07-22	Morning	open - pheromone allowed	open	allowed	11	gold1141842	gold	L	5	RR		0	1	food	0	2	nest	1	2
2014-07-22	Morning	open - pheromone allowed	open	allowed	11	gold1141842	gold	L	6	LL		1	0	food	0	0	nest	0	0
2014-07-22	Morning	open - pheromone allowed	open	allowed	11	gold1141842	gold	L	7	RR		0	1	food	0	0	nest
2014-07-22	Morning	open - pheromone allowed	open	allowed	11	yellow1141842	yellow	L	0					food			nest	0	2
2014-07-22	Morning	open - pheromone allowed	open	allowed	11	yellow1141842	yellow	L	1	LL		1	0	food	1	0	nest	1	1
2014-07-22	Morning	open - pheromone allowed	open	allowed	11	yellow1141842	yellow	L	2	LL		1	0	food	1	0	nest	3	0
2014-07-22	Morning	open - pheromone allowed	open	allowed	11	yellow1141842	yellow	L	3	R*L	1	0	0	food	0	0	nest	0	0
2014-07-22	Morning	open - pheromone allowed	open	allowed	11	yellow1141842	yellow	L	4	RL		0	0	food	0	0	nest	0
2014-07-22	Morning	open - pheromone allowed	open	allowed	11	yellow1141842	yellow	L	5	RL		0	0	food	0	0	nest	1
2014-07-22	Morning	open - pheromone allowed	open	allowed	11	yellow1141842	yellow	L	6	LR		1	1	food	0	0	nest
2014-07-22	Morning	open - pheromone allowed	open	allowed	11	yellow1141842	yellow	L	7	LL		1	0	food	0	2	nest
2014-07-22	Morning	open - pheromone allowed	open	allowed	11	green1141842	green	L	0					food			nest	0
2014-07-22	Morning	open - pheromone allowed	open	allowed	11	green1141842	green	L	1	LR		1	1	food			nest	0	2
2014-07-22	Morning	open - pheromone allowed	open	allowed	11	green1141842	green	L	2	LR		1	1	food	0	0	nest	0	0
2014-07-22	Morning	open - pheromone allowed	open	allowed	11	green1141842	green	L	3	LR		1	1	food	0	1	nest	0	1
2014-07-22	Morning	open - pheromone allowed	open	allowed	11	green1141842	green	L	4	LR		1	1	food	0	0	nest	0	0
2014-07-22	Morning	open - pheromone allowed	open	allowed	11	green1141842	green	L	5	LR		1	1	food	1	0	nest	2	1
2014-07-22	Morning	open - pheromone allowed	open	allowed	11	green1141842	green	L	6	LR		1	1	food	1	1	nest	2	1
2014-07-22	Morning	open - pheromone allowed	open	allowed	11	green1141842	green	L	7	RR		0	1	food	0	0	nest
2014-07-22	Morning	open - pheromone allowed	open	allowed	11	red1141842	red	L	0					food			nest
2014-07-22	Morning	open - pheromone allowed	open	allowed	11	red1141842	red	L	1	LR		1	1	food	0	0	nest	5	5
2014-07-22	Morning	open - pheromone allowed	open	allowed	11	red1141842	red	L	2	LL		1	0	food	3	1	nest	1	3
2014-07-22	Morning	open - pheromone allowed	open	allowed	11	red1141842	red	L	3	LR		1	1	food	1	0	nest	1	1
2014-07-22	Morning	open - pheromone allowed	open	allowed	11	red1141842	red	L	4	LL		1	0	food	0	0	nest	1	0
2014-07-22	Morning	open - pheromone allowed	open	allowed	11	red1141842	red	L	5	LL		1	0	food	0	2	nest	0	0
2014-07-22	Morning	open - pheromone allowed	open	allowed	11	red1141842	red	L	6	LR		1	1	food	0	0	nest	0	0
2014-07-22	Morning	open - pheromone allowed	open	allowed	11	red1141842	red	L	7	LL		1	0	food	0	1	nest
2014-07-22	Morning	open - pheromone allowed	open	allowed	11	orange1141842	orange	L	0					food			nest	0	1
2014-07-22	Morning	open - pheromone allowed	open	allowed	11	orange1141842	orange	L	1	RR		0	1	food	0	0	nest
2014-07-22	Morning	open - pheromone allowed	open	allowed	11	orange1141842	orange	L	2	LL		1	0	food	0	2	nest	2	2
2014-07-22	Morning	open - pheromone allowed	open	allowed	11	orange1141842	orange	L	3	LR		1	1	food	0	0	nest	0
2014-07-22	Morning	open - pheromone allowed	open	allowed	11	orange1141842	orange	L	4	LL		1	0	food	0	1	nest	1	2
2014-07-22	Morning	open - pheromone allowed	open	allowed	11	orange1141842	orange	L	5	LR		1	1	food	0	0	nest	1	0
2014-07-22	Morning	open - pheromone allowed	open	allowed	11	orange1141842	orange	L	6	LL		1	0	food	0	0	nest	0	0
2014-07-22	Morning	open - pheromone allowed	open	allowed	11	orange1141842	orange	L	7	RR		0	1	food	0	0	nest
2014-07-23	Morning	open - pheromone allowed	open	allowed	5	gold541843	gold	R	0					food			nest	0
2014-07-23	Morning	open - pheromone allowed	open	allowed	5	gold541843	gold	R	1	L*R	1	0	0	food	0	0	nest	2
2014-07-23	Morning	open - pheromone allowed	open	allowed	5	gold541843	gold	R	2	RL		1	1	food	3	0	nest	0
2014-07-23	Morning	open - pheromone allowed	open	allowed	5	gold541843	gold	R	3	RL		1	1	food	3	3	nest	0
2014-07-23	Morning	open - pheromone allowed	open	allowed	5	gold541843	gold	R	4	RL		1	1	food	0	0	nest	0
2014-07-23	Morning	open - pheromone allowed	open	allowed	5	gold541843	gold	R	5	RL		1	1	food	0	0	nest	0	0
2014-07-23	Morning	open - pheromone allowed	open	allowed	5	gold541843	gold	R	6	RL		1	1	food			nest	0	1
2014-07-23	Morning	open - pheromone allowed	open	allowed	5	gold541843	gold	R	7	LL		0	1	food	0	0	nest
2014-07-23	Morning	open - pheromone allowed	open	allowed	5	yellow541843	yellow	R	0					food			nest	0
2014-07-23	Morning	open - pheromone allowed	open	allowed	5	yellow541843	yellow	R	1	L*L	1	0	1	food	0	6	nest	6	2
2014-07-23	Morning	open - pheromone allowed	open	allowed	5	yellow541843	yellow	R	2	L*L	1	0	1	food	0	2	nest	0	0
2014-07-23	Morning	open - pheromone allowed	open	allowed	5	yellow541843	yellow	R	3	RL		1	1	food	0	0	nest	1	0
2014-07-23	Morning	open - pheromone allowed	open	allowed	5	yellow541843	yellow	R	4	RL		1	1	food		0	nest	0	0
2014-07-23	Morning	open - pheromone allowed	open	allowed	5	yellow541843	yellow	R	5	RL		1	1	food	0	0	nest	0	0
2014-07-23	Morning	open - pheromone allowed	open	allowed	5	yellow541843	yellow	R	6	RL		1	1	food	0	0	nest
2014-07-23	Morning	open - pheromone allowed	open	allowed	5	yellow541843	yellow	R	7	LL		0	1	food	0	0	nest
2014-07-23	Morning	open - pheromone allowed	open	allowed	5	green541843	green	R	0					food			nest
2014-07-23	Morning	open - pheromone allowed	open	allowed	5	green541843	green	R	1	L*R	1	0	0	food			nest	3
2014-07-23	Morning	open - pheromone allowed	open	allowed	5	green541843	green	R	2	L*L	1	0	1	food		0	nest	2	2
2014-07-23	Morning	open - pheromone allowed	open	allowed	5	green541843	green	R	3	RL		1	1	food	0	1	nest	2
2014-07-23	Morning	open - pheromone allowed	open	allowed	5	green541843	green	R	4	RL		1	1	food	0	0	nest	1	0
2014-07-23	Morning	open - pheromone allowed	open	allowed	5	green541843	green	R	5	RL		1	1	food	0	0	nest
2014-07-23	Morning	open - pheromone allowed	open	allowed	5	green541843	green	R	6	RL		1	1	food	0	0	nest	0	0
2014-07-23	Morning	open - pheromone allowed	open	allowed	5	green541843	green	R	7	LL		0	1	food	0	0	nest
2014-07-23	Morning	open - pheromone allowed	open	allowed	5	red541843	red	R	0					food			nest
2014-07-23	Morning	open - pheromone allowed	open	allowed	5	red541843	red	R	1	LR		0	0	food			nest	0	2
2014-07-23	Morning	open - pheromone allowed	open	allowed	5	red541843	red	R	2	L*L	1	0	1	food	0	0	nest	1
2014-07-23	Morning	open - pheromone allowed	open	allowed	5	red541843	red	R	3	RL		1	1	food	0	0	nest
2014-07-23	Morning	open - pheromone allowed	open	allowed	5	red541843	red	R	4	RL		1	1	food	0	3	nest
2014-07-23	Morning	open - pheromone allowed	open	allowed	5	red541843	red	R	5	RL		1	1	food	1	1	nest	0	0
2014-07-23	Morning	open - pheromone allowed	open	allowed	5	red541843	red	R	6	RL		1	1	food	1	1	nest	1	0
2014-07-23	Morning	open - pheromone allowed	open	allowed	5	red541843	red	R	7	LL		0	1	food	2	0	nest
2014-07-23	Morning	open - pheromone allowed	open	allowed	5	orange541843	orange	R	0					food			nest
2014-07-23	Morning	open - pheromone allowed	open	allowed	5	orange541843	orange	R	1	RL		1	1	food	0	0	nest
2014-07-23	Morning	open - pheromone allowed	open	allowed	5	orange541843	orange	R	2	L*L	1	0	1	food	0	1	nest	0	0
2014-07-23	Morning	open - pheromone allowed	open	allowed	5	orange541843	orange	R	3	LR		0	0	food	0	3	nest
2014-07-23	Morning	open - pheromone allowed	open	allowed	5	orange541843	orange	R	4	RL		1	1	food	0	0	nest	0	0
2014-07-23	Morning	open - pheromone allowed	open	allowed	5	orange541843	orange	R	5	L*L	1	0	1	food			nest	0	0
2014-07-23	Morning	open - pheromone allowed	open	allowed	5	orange541843	orange	R	6	RL		1	1	food	1	1	nest	0	0
2014-07-23	Morning	open - pheromone allowed	open	allowed	5	orange541843	orange	R	7	LR		0	0	food			nest
2014-07-23	Morning	open - pheromone allowed	open	allowed	888split	gold888split41843	gold	L	0					food			nest	1	3
2014-07-23	Morning	open - pheromone allowed	open	allowed	888split	gold888split41843	gold	L	1	LL		1	0	food	0	0	nest	0	0
2014-07-23	Morning	open - pheromone allowed	open	allowed	888split	gold888split41843	gold	L	2	LL		1	0	food	2	0	nest
2014-07-23	Morning	open - pheromone allowed	open	allowed	888split	gold888split41843	gold	L	3	LL		1	0	food	0	0	nest
2014-07-23	Morning	open - pheromone allowed	open	allowed	888split	gold888split41843	gold	L	4	L*R	1	1	1	food	0		nest	3	1
2014-07-23	Morning	open - pheromone allowed	open	allowed	888split	gold888split41843	gold	L	5	LR		1	1	food	0	0	nest	1	1
2014-07-23	Morning	open - pheromone allowed	open	allowed	888split	gold888split41843	gold	L	6	LR		1	1	food	0	0	nest	0	0
2014-07-23	Morning	open - pheromone allowed	open	allowed	888split	gold888split41843	gold	L	7	RR		0	1	food	0	0	nest
2014-07-23	Morning	open - pheromone allowed	open	allowed	888split	yellow888split41843	yellow	L	0					food			nest
2014-07-23	Morning	open - pheromone allowed	open	allowed	888split	yellow888split41843	yellow	L	1	LL		1	1	food	0	2	nest	1
2014-07-23	Morning	open - pheromone allowed	open	allowed	888split	yellow888split41843	yellow	L	2	LL		1	1	food	1	2	nest	0	0
2014-07-23	Morning	open - pheromone allowed	open	allowed	888split	yellow888split41843	yellow	L	3	LL		1	1	food	0	2	nest	0	0
2014-07-23	Morning	open - pheromone allowed	open	allowed	888split	yellow888split41843	yellow	L	4	L*L	1	1	0	food			nest	1
2014-07-23	Morning	open - pheromone allowed	open	allowed	888split	yellow888split41843	yellow	L	5	LR		1	1	food	0	0	nest	0	0
2014-07-23	Morning	open - pheromone allowed	open	allowed	888split	yellow888split41843	yellow	L	6	LL		1	0	food	0	0	nest	0	0
2014-07-23	Morning	open - pheromone allowed	open	allowed	888split	yellow888split41843	yellow	L	7	LR		1	1	food	0	0	nest
2014-07-23	Morning	open - pheromone allowed	open	allowed	888split	green888split41843	green	L	0					food			nest
2014-07-23	Morning	open - pheromone allowed	open	allowed	888split	green888split41843	green	L	1	LL		1	0	food	0	0	nest	0
2014-07-23	Morning	open - pheromone allowed	open	allowed	888split	green888split41843	green	L	2	RR		0	1	food	0	0	nest	0	0
2014-07-23	Morning	open - pheromone allowed	open	allowed	888split	green888split41843	green	L	3	LL		1	0	food	0	0	nest	0	0
2014-07-23	Morning	open - pheromone allowed	open	allowed	888split	green888split41843	green	L	4	L*L	1	1	0	food			nest	0	0
2014-07-23	Morning	open - pheromone allowed	open	allowed	888split	green888split41843	green	L	5	LL		1	0	food	0	0	nest	0	0
2014-07-23	Morning	open - pheromone allowed	open	allowed	888split	green888split41843	green	L	6	LR		1	1	food	0	0	nest	0	0
2014-07-23	Morning	open - pheromone allowed	open	allowed	888split	green888split41843	green	L	7	LR		1	1	food	0	0	nest
2014-07-23	Morning	open - pheromone allowed	open	allowed	888split	red888split41843	red	L	0					food			nest
2014-07-23	Morning	open - pheromone allowed	open	allowed	888split	red888split41843	red	L	1	LL		1	0	food	2	2	nest	2	0
2014-07-23	Morning	open - pheromone allowed	open	allowed	888split	red888split41843	red	L	2	LL		1	0	food	0	0	nest	5	3
2014-07-23	Morning	open - pheromone allowed	open	allowed	888split	red888split41843	red	L	3	L*L	1	1	0	food	2	1	nest	3
2014-07-23	Morning	open - pheromone allowed	open	allowed	888split	red888split41843	red	L	4	L*R	1	1	1	food	3	2	nest
2014-07-23	Morning	open - pheromone allowed	open	allowed	888split	red888split41843	red	L	5	LL		1	0	food	0	1	nest	2	2
2014-07-23	Morning	open - pheromone allowed	open	allowed	888split	red888split41843	red	L	6	LL		1	0	food	1	0	nest	2	1
2014-07-23	Morning	open - pheromone allowed	open	allowed	888split	red888split41843	red	L	7	LR		1	1	food	2	0	nest
2014-07-23	Morning	open - pheromone allowed	open	allowed	888split	orange888split41843	orange	L	0					food			nest	0	0
2014-07-23	Morning	open - pheromone allowed	open	allowed	888split	orange888split41843	orange	L	1	LR		1	1	food	0	0	nest	0	0
2014-07-23	Morning	open - pheromone allowed	open	allowed	888split	orange888split41843	orange	L	2	LR		1	1	food	0	0	nest	1	0
2014-07-23	Morning	open - pheromone allowed	open	allowed	888split	orange888split41843	orange	L	3	LR		1	1	food	0	0	nest	0	0
2014-07-23	Morning	open - pheromone allowed	open	allowed	888split	orange888split41843	orange	L	4	RR		0	1	food	0	0	nest	1	0
2014-07-23	Morning	open - pheromone allowed	open	allowed	888split	orange888split41843	orange	L	5	LR		1	1	food	0	0	nest	0	0
2014-07-23	Morning	open - pheromone allowed	open	allowed	888split	orange888split41843	orange	L	6	LR		1	1	food	0	0	nest	0	0
2014-07-23	Morning	open - pheromone allowed	open	allowed	888split	orange888split41843	orange	L	7	RR		0	1	food		0	nest
2014-07-24	Morning	open - pheromone allowed	open	allowed	12	gold1241844	gold	L	0					food			nest	0	0
2014-07-24	Morning	open - pheromone allowed	open	allowed	12	gold1241844	gold	L	1	LL		1	0	food	2	0	nest	2	5
2014-07-24	Morning	open - pheromone allowed	open	allowed	12	gold1241844	gold	L	2	LR		1	1	food	0	0	nest
2014-07-24	Morning	open - pheromone allowed	open	allowed	12	gold1241844	gold	L	3	R*R	1	0	1	food	0	0	nest	0	0
2014-07-24	Morning	open - pheromone allowed	open	allowed	12	gold1241844	gold	L	4	LR		1	1	food	0	0	nest	0	0
2014-07-24	Morning	open - pheromone allowed	open	allowed	12	gold1241844	gold	L	5	R*R	1	0	1	food	1	0	nest	1	0
2014-07-24	Morning	open - pheromone allowed	open	allowed	12	gold1241844	gold	L	6	RL		0	0	food	0	0	nest	2	1
2014-07-24	Morning	open - pheromone allowed	open	allowed	12	gold1241844	gold	L	7	RL		0	0	food	0	0	nest
2014-07-24	Morning	open - pheromone allowed	open	allowed	12	yellow1241844	yellow	L	0					food			nest		4
2014-07-24	Morning	open - pheromone allowed	open	allowed	12	yellow1241844	yellow	L	1	R*R	1	0	1	food	0	2	nest
2014-07-24	Morning	open - pheromone allowed	open	allowed	12	yellow1241844	yellow	L	2	LR		1	1	food	3	2	nest	2	2
2014-07-24	Morning	open - pheromone allowed	open	allowed	12	yellow1241844	yellow	L	3	LR		1	1	food	0	1	nest	0	0
2014-07-24	Morning	open - pheromone allowed	open	allowed	12	yellow1241844	yellow	L	4	LR		1	1	food	0	0	nest	1	0
2014-07-24	Morning	open - pheromone allowed	open	allowed	12	yellow1241844	yellow	L	5	RL		0	0	food	0	0	nest	2	1
2014-07-24	Morning	open - pheromone allowed	open	allowed	12	yellow1241844	yellow	L	6	LL		1	0	food	0	0	nest	2	1
2014-07-24	Morning	open - pheromone allowed	open	allowed	12	yellow1241844	yellow	L	7	R*L	1	0	0	food	0	1	nest
2014-07-24	Morning	open - pheromone allowed	open	allowed	12	green1241844	green	L	0					food			nest	1
2014-07-24	Morning	open - pheromone allowed	open	allowed	12	green1241844	green	L	1	LL		1	0	food	2	0	nest	1	3
2014-07-24	Morning	open - pheromone allowed	open	allowed	12	green1241844	green	L	2	LR		1	1	food	0	0	nest	2	3
2014-07-24	Morning	open - pheromone allowed	open	allowed	12	green1241844	green	L	3	L*R	1	1	1	food	0	0	nest	0	2
2014-07-24	Morning	open - pheromone allowed	open	allowed	12	green1241844	green	L	4	LR		1	1	food	0	0	nest	0	0
2014-07-24	Morning	open - pheromone allowed	open	allowed	12	green1241844	green	L	5	LR		1	1	food	0	0	nest	2	0
2014-07-24	Morning	open - pheromone allowed	open	allowed	12	green1241844	green	L	6	L*R	1	1	1	food	0	0	nest	2	1
2014-07-24	Morning	open - pheromone allowed	open	allowed	12	green1241844	green	L	7	RR		0	1	food	0	0	nest
2014-07-24	Morning	open - pheromone allowed	open	allowed	12	red1241844	red	L	0					food			nest		0
2014-07-24	Morning	open - pheromone allowed	open	allowed	12	red1241844	red	L	1	LR		1	1	food	0	0	nest	2	3
2014-07-24	Morning	open - pheromone allowed	open	allowed	12	red1241844	red	L	2	LR		1	1	food	0	0	nest	1	3
2014-07-24	Morning	open - pheromone allowed	open	allowed	12	red1241844	red	L	3	LR		1	1	food	0	0	nest	0	2
2014-07-24	Morning	open - pheromone allowed	open	allowed	12	red1241844	red	L	4	L*R	1	1	1	food	0	0	nest	1	1
2014-07-24	Morning	open - pheromone allowed	open	allowed	12	red1241844	red	L	5	LR		1	1	food	0	0	nest	1	3
2014-07-24	Morning	open - pheromone allowed	open	allowed	12	red1241844	red	L	6	LR		1	1	food	0	0	nest	2	3
2014-07-24	Morning	open - pheromone allowed	open	allowed	12	red1241844	red	L	7	LR		1	1	food	0	0	nest
2014-07-24	Morning	open - pheromone allowed	open	allowed	12	orange1241844	orange	L	0					food			nest		2
2014-07-24	Morning	open - pheromone allowed	open	allowed	12	orange1241844	orange	L	1	LL		1	0	food	0	0	nest	4	2
2014-07-24	Morning	open - pheromone allowed	open	allowed	12	orange1241844	orange	L	2	LL		1	0	food	0	0	nest	1
2014-07-24	Morning	open - pheromone allowed	open	allowed	12	orange1241844	orange	L	3	LR		1	1	food	0	0	nest	1	2
2014-07-24	Morning	open - pheromone allowed	open	allowed	12	orange1241844	orange	L	4	LR		1	1	food	0	0	nest	2	1
2014-07-24	Morning	open - pheromone allowed	open	allowed	12	orange1241844	orange	L	5	LR		1	1	food	0	0	nest	1	0
2014-07-24	Morning	open - pheromone allowed	open	allowed	12	orange1241844	orange	L	6	RR		0	1	food	0	1	nest	1	2
2014-07-24	Morning	open - pheromone allowed	open	allowed	12	orange1241844	orange	L	7	RL		0	0	food	0	0	nest
2014-07-24	Morning	open - pheromone allowed	open	allowed	3	gold341844	gold	R	0					food			nest
2014-07-24	Morning	open - pheromone allowed	open	allowed	3	gold341844	gold	R	1	RL		1	1	food	3	2	nest	5	3
2014-07-24	Morning	open - pheromone allowed	open	allowed	3	gold341844	gold	R	2	R*R	1	1	0	food	4	0	nest	4	2
2014-07-24	Morning	open - pheromone allowed	open	allowed	3	gold341844	gold	R	3	L*L	1	0	1	food	0	1	nest	1
2014-07-24	Morning	open - pheromone allowed	open	allowed	3	gold341844	gold	R	4	RL		1	1	food	0	2	nest	1	4
2014-07-24	Morning	open - pheromone allowed	open	allowed	3	gold341844	gold	R	5	L*L	1	0	1	food	1	2	nest	0	1
2014-07-24	Morning	open - pheromone allowed	open	allowed	3	gold341844	gold	R	6	RL		1	1	food	0	0	nest	1
2014-07-24	Morning	open - pheromone allowed	open	allowed	3	gold341844	gold	R	7	LR		0	0	food	0	0	nest
2014-07-24	Morning	open - pheromone allowed	open	allowed	3	yellow341844	yellow	R	0					food			nest		0
2014-07-24	Morning	open - pheromone allowed	open	allowed	3	yellow341844	yellow	R	1	RL		1	1	food	0	0	nest	0	1
2014-07-24	Morning	open - pheromone allowed	open	allowed	3	yellow341844	yellow	R	2	L*L	1	0	1	food	2	0	nest	2
2014-07-24	Morning	open - pheromone allowed	open	allowed	3	yellow341844	yellow	R	3	RL		1	1	food	2	1	nest	4	2
2014-07-24	Morning	open - pheromone allowed	open	allowed	3	yellow341844	yellow	R	4	RL		1	1	food	0	0	nest	2	0
2014-07-24	Morning	open - pheromone allowed	open	allowed	3	yellow341844	yellow	R	5	L*L	1	0	1	food	0	3	nest	1	0
2014-07-24	Morning	open - pheromone allowed	open	allowed	3	yellow341844	yellow	R	6	L*L	1	0	1	food	0	4	nest	2	2
2014-07-24	Morning	open - pheromone allowed	open	allowed	3	yellow341844	yellow	R	7	L*L	1	0	1	food	6	5	nest
2014-07-24	Morning	open - pheromone allowed	open	allowed	3	green341844	green	R	0					food			nest	0
2014-07-24	Morning	open - pheromone allowed	open	allowed	3	green341844	green	R	1	RR		0	1	food	1	0	nest	3	0
2014-07-24	Morning	open - pheromone allowed	open	allowed	3	green341844	green	R	2	L*L	1	0	1	food	0	0	nest	1	1
2014-07-24	Morning	open - pheromone allowed	open	allowed	3	green341844	green	R	3	RL		1	1	food	0	0	nest	1	1
2014-07-24	Morning	open - pheromone allowed	open	allowed	3	green341844	green	R	4	RL		1	1	food	0	0	nest	2	0
2014-07-24	Morning	open - pheromone allowed	open	allowed	3	green341844	green	R	5	RL		1	1	food	0	0	nest	3	2
2014-07-24	Morning	open - pheromone allowed	open	allowed	3	green341844	green	R	6	LR		0	0	food	0	0	nest	2	1
2014-07-24	Morning	open - pheromone allowed	open	allowed	3	green341844	green	R	7	RR		0	1	food	0	0	nest
2014-07-24	Morning	open - pheromone allowed	open	allowed	3	red341844	red	R	0					food			nest	3	3
2014-07-24	Morning	open - pheromone allowed	open	allowed	3	red341844	red	R	1	RR		1	0	food	0	0	nest	2	1
2014-07-24	Morning	open - pheromone allowed	open	allowed	3	red341844	red	R	2	RL		1	1	food	0	0	nest	0	0
2014-07-24	Morning	open - pheromone allowed	open	allowed	3	red341844	red	R	3	RL		1	1	food	0	0	nest	0	1
2014-07-24	Morning	open - pheromone allowed	open	allowed	3	red341844	red	R	4	RR		1	0	food	0	0	nest	0	3
2014-07-24	Morning	open - pheromone allowed	open	allowed	3	red341844	red	R	5	RL		1	1	food	1	0	nest
2014-07-24	Morning	open - pheromone allowed	open	allowed	3	red341844	red	R	6	RL		1	1	food	0	0	nest	0	0
2014-07-24	Morning	open - pheromone allowed	open	allowed	3	red341844	red	R	7	LL		0	1	food	0	0	nest
2014-07-24	Morning	open - pheromone allowed	open	allowed	3	orange341844	orange	R	0					food			nest	0
2014-07-24	Morning	open - pheromone allowed	open	allowed	3	orange341844	orange	R	1	RL		1	1	food	0	0	nest	0	4
2014-07-24	Morning	open - pheromone allowed	open	allowed	3	orange341844	orange	R	2	RL		1	1	food	3	2	nest	2
2014-07-24	Morning	open - pheromone allowed	open	allowed	3	orange341844	orange	R	3	L*L	1	0	1	food	2	3	nest	2	2
2014-07-24	Morning	open - pheromone allowed	open	allowed	3	orange341844	orange	R	4	L*L	1	0	1	food	1	1	nest
2014-07-24	Morning	open - pheromone allowed	open	allowed	3	orange341844	orange	R	5	RL		1	1	food	0	0	nest	0	1
2014-07-24	Morning	open - pheromone allowed	open	allowed	3	orange341844	orange	R	6	L*L	1	0	1	food	0	0	nest	0
2014-07-24	Morning	open - pheromone allowed	open	allowed	3	orange341844	orange	R	7	RL		1	1	food	0	0	nest
2014-07-25	Morning	open - pheromone allowed	open	allowed	6	gold641845	gold	R	0					food			nest		0
2014-07-25	Morning	open - pheromone allowed	open	allowed	6	gold641845	gold	R	1	LL		0	1	food	0	0	nest	0	0
2014-07-25	Morning	open - pheromone allowed	open	allowed	6	gold641845	gold	R	2	RL		1	1	food	0	1	nest	0
2014-07-25	Morning	open - pheromone allowed	open	allowed	6	gold641845	gold	R	3	L*L	1	0	1	food	0	0	nest	0	0
2014-07-25	Morning	open - pheromone allowed	open	allowed	6	gold641845	gold	R	4	RL		1	1	food	0	1	nest	0	0
2014-07-25	Morning	open - pheromone allowed	open	allowed	6	gold641845	gold	R	5	RL		1	1	food	0	0	nest	1	0
2014-07-25	Morning	open - pheromone allowed	open	allowed	6	gold641845	gold	R	6					food			nest	0	2
2014-07-25	Morning	open - pheromone allowed	open	allowed	6	gold641845	gold	R	7	RL		1	1	food	0	0	nest
2014-07-25	Morning	open - pheromone allowed	open	allowed	6	yellow641845	yellow	R	0					food			nest	0
2014-07-25	Morning	open - pheromone allowed	open	allowed	6	yellow641845	yellow	R	1	L*L	1	0	1	food	3	0	nest	0
2014-07-25	Morning	open - pheromone allowed	open	allowed	6	yellow641845	yellow	R	2	RL		1	1	food	0	0	nest	0	0
2014-07-25	Morning	open - pheromone allowed	open	allowed	6	yellow641845	yellow	R	3	RL		1	1	food	0	0	nest	0	0
2014-07-25	Morning	open - pheromone allowed	open	allowed	6	yellow641845	yellow	R	4	LR		0	0	food	0	0	nest	0	0
2014-07-25	Morning	open - pheromone allowed	open	allowed	6	yellow641845	yellow	R	5	RL		1	1	food	0	0	nest	0	1
2014-07-25	Morning	open - pheromone allowed	open	allowed	6	yellow641845	yellow	R	6	RL		1	1	food	0	1	nest	2	0
2014-07-25	Morning	open - pheromone allowed	open	allowed	6	yellow641845	yellow	R	7	RL		1	1	food	0	0	nest
2014-07-25	Morning	open - pheromone allowed	open	allowed	6	green641845	green	R	0					food			nest	0
2014-07-25	Morning	open - pheromone allowed	open	allowed	6	green641845	green	R	1	RL		1	1	food	3	2	nest	1	3
2014-07-25	Morning	open - pheromone allowed	open	allowed	6	green641845	green	R	2	RL		1	1	food	4	4	nest	1	3
2014-07-25	Morning	open - pheromone allowed	open	allowed	6	green641845	green	R	3	L*L	1	0	1	food	0	0	nest	0	0
2014-07-25	Morning	open - pheromone allowed	open	allowed	6	green641845	green	R	4	RL		1	1	food	3	1	nest	0	1
2014-07-25	Morning	open - pheromone allowed	open	allowed	6	green641845	green	R	5	L*L	1	0	1	food	0	0	nest		1
2014-07-25	Morning	open - pheromone allowed	open	allowed	6	green641845	green	R	6	LR		0	0	food	0	0	nest	1
2014-07-25	Morning	open - pheromone allowed	open	allowed	6	green641845	green	R	7	LR		0	0	food	0	0	nest
2014-07-25	Morning	open - pheromone allowed	open	allowed	6	red641845	red	R	0					food			nest
2014-07-25	Morning	open - pheromone allowed	open	allowed	6	red641845	red	R	1	RL		1	1	food	2	2	nest
2014-07-25	Morning	open - pheromone allowed	open	allowed	6	red641845	red	R	2	L*L	1	0	1	food	4	1	nest	1	2
2014-07-25	Morning	open - pheromone allowed	open	allowed	6	red641845	red	R	3	RL		1	1	food	2	2	nest	2	0
2014-07-25	Morning	open - pheromone allowed	open	allowed	6	red641845	red	R	4	RL		1	1	food	0	1	nest	2	1
2014-07-25	Morning	open - pheromone allowed	open	allowed	6	red641845	red	R	5	RL		1	1	food	2	0	nest	2	1
2014-07-25	Morning	open - pheromone allowed	open	allowed	6	red641845	red	R	6	RL		1	1	food	2	2	nest	2
2014-07-25	Morning	open - pheromone allowed	open	allowed	6	red641845	red	R	7	LR		0	0	food	0	0	nest
2014-07-25	Morning	open - pheromone allowed	open	allowed	6	orange641845	orange	R	0					food			nest
2014-07-25	Morning	open - pheromone allowed	open	allowed	6	orange641845	orange	R	1	RL		1	1	food	2	2	nest	2
2014-07-25	Morning	open - pheromone allowed	open	allowed	6	orange641845	orange	R	2	L*L	1	0	1	food	4	1	nest	3	3
2014-07-25	Morning	open - pheromone allowed	open	allowed	6	orange641845	orange	R	3	RL		1	1	food	0	0	nest	2	3
2014-07-25	Morning	open - pheromone allowed	open	allowed	6	orange641845	orange	R	4	RL		1	1	food	0	0	nest	0	3
2014-07-25	Morning	open - pheromone allowed	open	allowed	6	orange641845	orange	R	5	RL		1	1	food	0	0	nest	0	0
2014-07-25	Morning	open - pheromone allowed	open	allowed	6	orange641845	orange	R	6					food			nest	1	0
2014-07-25	Morning	open - pheromone allowed	open	allowed	6	orange641845	orange	R	7	RR		1	0	food	0	0	nest
2014-07-25	Morning	open - pheromone allowed	open	allowed	RGB8	goldRGB841845	gold	L	0					food			nest	0	0
2014-07-25	Morning	open - pheromone allowed	open	allowed	RGB8	goldRGB841845	gold	L	1	LL		1	0	food	0	0	nest	1	1
2014-07-25	Morning	open - pheromone allowed	open	allowed	RGB8	goldRGB841845	gold	L	2	LR		1	1	food	0	0	nest
2014-07-25	Morning	open - pheromone allowed	open	allowed	RGB8	goldRGB841845	gold	L	3	LL		1	0	food	0	0	nest	0	1
2014-07-25	Morning	open - pheromone allowed	open	allowed	RGB8	goldRGB841845	gold	L	4	R*R	1	0	1	food	0	0	nest	0
2014-07-25	Morning	open - pheromone allowed	open	allowed	RGB8	goldRGB841845	gold	L	5	RR		0	1	food	0	0	nest	0	0
2014-07-25	Morning	open - pheromone allowed	open	allowed	RGB8	goldRGB841845	gold	L	6	RL		0	0	food	0	0	nest	0	0
2014-07-25	Morning	open - pheromone allowed	open	allowed	RGB8	goldRGB841845	gold	L	7	LR		1	1	food	0	0	nest
2014-07-25	Morning	open - pheromone allowed	open	allowed	RGB8	yellowRGB841845	yellow	L	0					food			nest	1	0
2014-07-25	Morning	open - pheromone allowed	open	allowed	RGB8	yellowRGB841845	yellow	L	1	LR		1	1	food	0	0	nest	4	3
2014-07-25	Morning	open - pheromone allowed	open	allowed	RGB8	yellowRGB841845	yellow	L	2	LR		1	1	food	1	0	nest	0	0
2014-07-25	Morning	open - pheromone allowed	open	allowed	RGB8	yellowRGB841845	yellow	L	3	LR		1	1	food	0	0	nest	0	0
2014-07-25	Morning	open - pheromone allowed	open	allowed	RGB8	yellowRGB841845	yellow	L	4	RR		0	1	food	0	0	nest	0	0
2014-07-25	Morning	open - pheromone allowed	open	allowed	RGB8	yellowRGB841845	yellow	L	5	LL		1	0	food	0	0	nest	0	3
2014-07-25	Morning	open - pheromone allowed	open	allowed	RGB8	yellowRGB841845	yellow	L	6	LL		1	0	food	0	0	nest	0	0
2014-07-25	Morning	open - pheromone allowed	open	allowed	RGB8	yellowRGB841845	yellow	L	7	LL		1	0	food	0	0	nest
2014-07-25	Morning	open - pheromone allowed	open	allowed	RGB8	greenRGB841845	green	L	0					food			nest
2014-07-25	Morning	open - pheromone allowed	open	allowed	RGB8	greenRGB841845	green	L	1	LL		1	0	food	1	3	nest		0
2014-07-25	Morning	open - pheromone allowed	open	allowed	RGB8	greenRGB841845	green	L	2	LL		1	0	food	2	0	nest	0	0
2014-07-25	Morning	open - pheromone allowed	open	allowed	RGB8	greenRGB841845	green	L	3	L*R	1	1	1	food	0	0	nest
2014-07-25	Morning	open - pheromone allowed	open	allowed	RGB8	greenRGB841845	green	L	4	RR		0	1	food	0	0	nest
2014-07-25	Morning	open - pheromone allowed	open	allowed	RGB8	greenRGB841845	green	L	5	LL		1	0	food	0	0	nest	0
2014-07-25	Morning	open - pheromone allowed	open	allowed	RGB8	greenRGB841845	green	L	6	LL		1	0	food	0	0	nest	0	0
2014-07-25	Morning	open - pheromone allowed	open	allowed	RGB8	greenRGB841845	green	L	7	LR		1	1	food	0	0	nest
2014-07-25	Morning	open - pheromone allowed	open	allowed	RGB8	redRGB841845	red	L	0					food			nest
2014-07-25	Morning	open - pheromone allowed	open	allowed	RGB8	redRGB841845	red	L	1	R*L	1	0	0	food	0	0	nest	1
2014-07-25	Morning	open - pheromone allowed	open	allowed	RGB8	redRGB841845	red	L	2	RL		0	0	food	0	0	nest	0	0
2014-07-25	Morning	open - pheromone allowed	open	allowed	RGB8	redRGB841845	red	L	3	L*L	1	1	0	food	0	0	nest	0	0
2014-07-25	Morning	open - pheromone allowed	open	allowed	RGB8	redRGB841845	red	L	4	LR		1	1	food	0	1	nest	0	0
2014-07-25	Morning	open - pheromone allowed	open	allowed	RGB8	redRGB841845	red	L	5	R*R	1	0	1	food	0	0	nest	0
2014-07-25	Morning	open - pheromone allowed	open	allowed	RGB8	redRGB841845	red	L	6	R*R	1	0	1	food	0	2	nest	0	0
2014-07-25	Morning	open - pheromone allowed	open	allowed	RGB8	redRGB841845	red	L	7	R*R	1	0	1	food	0	0	nest
2014-07-25	Morning	open - pheromone allowed	open	allowed	RGB8	orangeRGB841845	orange	L	0					food			nest		0
2014-07-25	Morning	open - pheromone allowed	open	allowed	RGB8	orangeRGB841845	orange	L	1	R*L	1	0	0	food	0	2	nest	0	0
2014-07-25	Morning	open - pheromone allowed	open	allowed	RGB8	orangeRGB841845	orange	L	2	LL		1	0	food	1	0	nest	0	2
2014-07-25	Morning	open - pheromone allowed	open	allowed	RGB8	orangeRGB841845	orange	L	3	LL		1	0	food	0	0	nest	0
2014-07-25	Morning	open - pheromone allowed	open	allowed	RGB8	orangeRGB841845	orange	L	4	LR		1	1	food	0	0	nest
2014-07-25	Morning	open - pheromone allowed	open	allowed	RGB8	orangeRGB841845	orange	L	5	LL		1	0	food	0	0	nest	1	2
2014-07-25	Morning	open - pheromone allowed	open	allowed	RGB8	orangeRGB841845	orange	L	6	RL		0	0	food	0	0	nest	1	2
2014-07-25	Morning	open - pheromone allowed	open	allowed	RGB8	orangeRGB841845	orange	L	7	LL		1	0	food	0	0	nest
2014-06-17	Morning	open - pheromone removed	open	removed	5	blue541807	blue	R	0					food			nest
2014-06-17	Morning	open - pheromone removed	open	removed	5	blue541807	blue	R	1	RR		1	0	food	0	0	nest	0	0
2014-06-17	Morning	open - pheromone removed	open	removed	5	blue541807	blue	R	2	L*L	1	0	1	food	0	0	nest	3
2014-06-17	Morning	open - pheromone removed	open	removed	5	blue541807	blue	R	3	L*L	1	0	1	food			nest	4
2014-06-17	Morning	open - pheromone removed	open	removed	5	blue541807	blue	R	4	L*L	1	0	1	food	0	0	nest
2014-06-17	Morning	open - pheromone removed	open	removed	5	blue541807	blue	R	5	RR		1	0	food	0	0	nest	3
2014-06-17	Morning	open - pheromone removed	open	removed	5	blue541807	blue	R	6	LL		0	1	food		1	nest	2	4
2014-06-17	Morning	open - pheromone removed	open	removed	5	blue541807	blue	R	7	RL		1	1	food	0		nest	2	6
2014-06-17	Morning	open - pheromone removed	open	removed	5	yellow541807	yellow	R	0					food			nest
2014-06-17	Morning	open - pheromone removed	open	removed	5	yellow541807	yellow	R	1	LL		0	1	food	1	4	nest
2014-06-17	Morning	open - pheromone removed	open	removed	5	yellow541807	yellow	R	2	LR		0	0	food	0	0	nest	6	5
2014-06-17	Morning	open - pheromone removed	open	removed	5	yellow541807	yellow	R	3	LL		0	1	food			nest	4	6
2014-06-17	Morning	open - pheromone removed	open	removed	5	yellow541807	yellow	R	4	LL		0	1	food	4	4	nest	6	10
2014-06-17	Morning	open - pheromone removed	open	removed	5	yellow541807	yellow	R	5	RL		1	1	food			nest	4	5
2014-06-17	Morning	open - pheromone removed	open	removed	5	yellow541807	yellow	R	6	LL		0	1	food	4	5	nest	6	5
2014-06-17	Morning	open - pheromone removed	open	removed	5	yellow541807	yellow	R	7	L*L	1	0	1	food			nest	3
2014-06-17	Morning	open - pheromone removed	open	removed	5	green541807	green	R	0					food			nest		4
2014-06-17	Morning	open - pheromone removed	open	removed	5	green541807	green	R	1	R*L	1	1	1	food	1	0	nest
2014-06-17	Morning	open - pheromone removed	open	removed	5	green541807	green	R	2	RR		1	0	food	4		nest	6	6
2014-06-17	Morning	open - pheromone removed	open	removed	5	green541807	green	R	3	R*L	1	1	1	food	0	3	nest	4	5
2014-06-17	Morning	open - pheromone removed	open	removed	5	green541807	green	R	4	L*L	1	0	1	food			nest	3	5
2014-06-17	Morning	open - pheromone removed	open	removed	5	green541807	green	R	5	LL		0	1	food		1	nest	3	4
2014-06-17	Morning	open - pheromone removed	open	removed	5	green541807	green	R	6	LR		0	0	food	0	2	nest	6	5
2014-06-17	Morning	open - pheromone removed	open	removed	5	green541807	green	R	7	RL		1	1	food	0	1	nest	4	4
2014-06-17	Morning	open - pheromone removed	open	removed	5	red541807	red	R	0					food			nest
2014-06-17	Morning	open - pheromone removed	open	removed	5	red541807	red	R	1	R*L	1	1	1	food		0	nest	3
2014-06-17	Morning	open - pheromone removed	open	removed	5	red541807	red	R	2	RL		1	1	food	0	0	nest	3	3
2014-06-17	Morning	open - pheromone removed	open	removed	5	red541807	red	R	3	RL		1	1	food			nest	0	4
2014-06-17	Morning	open - pheromone removed	open	removed	5	red541807	red	R	4	LL		0	1	food	0	0	nest	3
2014-06-17	Morning	open - pheromone removed	open	removed	5	red541807	red	R	5	RL		1	1	food	3	4	nest	4	5
2014-06-17	Morning	open - pheromone removed	open	removed	5	red541807	red	R	6	L*L	1	0	1	food	2	3	nest	5
2014-06-17	Morning	open - pheromone removed	open	removed	5	red541807	red	R	7	LL		0	1	food			nest	5	4
2014-06-17	Morning	open - pheromone removed	open	removed	5	orange541807	orange	R	0					food			nest
2014-06-17	Morning	open - pheromone removed	open	removed	5	orange541807	orange	R	1	RL		1	1	food			nest	0	9
2014-06-17	Morning	open - pheromone removed	open	removed	5	orange541807	orange	R	2	LR		0	0	food			nest		6
2014-06-17	Morning	open - pheromone removed	open	removed	5	orange541807	orange	R	3	LL		0	1	food	6	6	nest	6
2014-06-17	Morning	open - pheromone removed	open	removed	5	orange541807	orange	R	4	LL		0	1	food	4		nest	4	8
2014-06-17	Morning	open - pheromone removed	open	removed	5	orange541807	orange	R	5	LR		0	0	food	5	0	nest	6	7
2014-06-17	Morning	open - pheromone removed	open	removed	5	orange541807	orange	R	6	LL		0	1	food			nest		4
2014-06-17	Morning	open - pheromone removed	open	removed	5	orange541807	orange	R	7	LL		0	1	food			nest	6	8
2014-06-17	Morning	open - pheromone removed	open	removed	888	blue88841807	blue	R	0					food			nest
2014-06-17	Morning	open - pheromone removed	open	removed	888	blue88841807	blue	R	1	R*L	1	1	1	food	3	0	nest	1
2014-06-17	Morning	open - pheromone removed	open	removed	888	blue88841807	blue	R	2	L*L	1	0	1	food	3	0	nest
2014-06-17	Morning	open - pheromone removed	open	removed	888	blue88841807	blue	R	3	R*R	1	1	0	food	0	0	nest	5	9
2014-06-17	Morning	open - pheromone removed	open	removed	888	blue88841807	blue	R	4	LL		0	1	food	0	0	nest	2	5
2014-06-17	Morning	open - pheromone removed	open	removed	888	blue88841807	blue	R	5	RR		1	0	food			nest		10
2014-06-17	Morning	open - pheromone removed	open	removed	888	blue88841807	blue	R	6	LL		0	1	food	1		nest	3	9
2014-06-17	Morning	open - pheromone removed	open	removed	888	blue88841807	blue	R	7	RR		1	0	food	0	0	nest
2014-06-17	Morning	open - pheromone removed	open	removed	888	yellow88841807	yellow	R	0					food			nest	0	7
2014-06-17	Morning	open - pheromone removed	open	removed	888	yellow88841807	yellow	R	1	RL		1	1	food			nest	1	0
2014-06-17	Morning	open - pheromone removed	open	removed	888	yellow88841807	yellow	R	2	LL		0	1	food	3	0	nest	5	5
2014-06-17	Morning	open - pheromone removed	open	removed	888	yellow88841807	yellow	R	3	LL		0	1	food	4	2	nest	0
2014-06-17	Morning	open - pheromone removed	open	removed	888	yellow88841807	yellow	R	4	L*L	1	0	1	food			nest	5
2014-06-17	Morning	open - pheromone removed	open	removed	888	yellow88841807	yellow	R	5	LL		0	1	food			nest
2014-06-17	Morning	open - pheromone removed	open	removed	888	yellow88841807	yellow	R	6	R*L	1	1	1	food			nest
2014-06-17	Morning	open - pheromone removed	open	removed	888	yellow88841807	yellow	R	7	L*L	1	0	1	food	4	0	nest	1	3
2014-06-17	Morning	open - pheromone removed	open	removed	888	green88841807	green	R	0					food			nest		3
2014-06-17	Morning	open - pheromone removed	open	removed	888	green88841807	green	R	1	RR		1	0	food		0	nest	2	0
2014-06-17	Morning	open - pheromone removed	open	removed	888	green88841807	green	R	2	L*L	1	0	1	food	1	0	nest
2014-06-17	Morning	open - pheromone removed	open	removed	888	green88841807	green	R	3	L*R	1	0	0	food	0	0	nest	2
2014-06-17	Morning	open - pheromone removed	open	removed	888	green88841807	green	R	4	RL		1	1	food			nest	4
2014-06-17	Morning	open - pheromone removed	open	removed	888	green88841807	green	R	5	LL		0	1	food	0	0	nest	5	2
2014-06-17	Morning	open - pheromone removed	open	removed	888	green88841807	green	R	6	LL		0	1	food			nest
2014-06-17	Morning	open - pheromone removed	open	removed	888	green88841807	green	R	7	LL		0	1	food			nest	1
2014-06-17	Morning	open - pheromone removed	open	removed	888	red88841807	red	R	0					food			nest		0
2014-06-17	Morning	open - pheromone removed	open	removed	888	red88841807	red	R	1	RR		1	0	food		0	nest	1
2014-06-17	Morning	open - pheromone removed	open	removed	888	red88841807	red	R	2					food			nest
2014-06-17	Morning	open - pheromone removed	open	removed	888	red88841807	red	R	3					food			nest
2014-06-17	Morning	open - pheromone removed	open	removed	888	red88841807	red	R	4					food			nest
2014-06-17	Morning	open - pheromone removed	open	removed	888	red88841807	red	R	5					food			nest
2014-06-17	Morning	open - pheromone removed	open	removed	888	red88841807	red	R	6					food			nest
2014-06-17	Morning	open - pheromone removed	open	removed	888	red88841807	red	R	7					food			nest
2014-06-17	Morning	open - pheromone removed	open	removed	888	orange88841807	orange	R	0					food			nest
2014-06-17	Morning	open - pheromone removed	open	removed	888	orange88841807	orange	R	1	R*L	1	1	1	food	0	0	nest	0	0
2014-06-17	Morning	open - pheromone removed	open	removed	888	orange88841807	orange	R	2	RL		1	1	food			nest	0	3
2014-06-17	Morning	open - pheromone removed	open	removed	888	orange88841807	orange	R	3	L*R	1	0	0	food	0	0	nest	2	3
2014-06-17	Morning	open - pheromone removed	open	removed	888	orange88841807	orange	R	4	L*L	1	0	1	food		3	nest	0
2014-06-17	Morning	open - pheromone removed	open	removed	888	orange88841807	orange	R	5	L*L	1	0	1	food	0	0	nest	1	4
2014-06-17	Morning	open - pheromone removed	open	removed	888	orange88841807	orange	R	6	R*R	1	1	0	food	0	1	nest	3	4
2014-06-17	Morning	open - pheromone removed	open	removed	888	orange88841807	orange	R	7	L*L	1	0	1	food	0	0	nest	3	1
2014-06-17	Afternoon	open - pheromone removed	open	removed	888	blue88841807	blue	L	0					food			nest
2014-06-17	Afternoon	open - pheromone removed	open	removed	888	blue88841807	blue	L	1	RL		0	0	food	4	2	nest	2	3
2014-06-17	Afternoon	open - pheromone removed	open	removed	888	blue88841807	blue	L	2	RR		0	1	food			nest	2
2014-06-17	Afternoon	open - pheromone removed	open	removed	888	blue88841807	blue	L	3	LR		1	1	food			nest	1	1
2014-06-17	Afternoon	open - pheromone removed	open	removed	888	blue88841807	blue	L	4	R*R	1	0	1	food	6	4	nest
2014-06-17	Afternoon	open - pheromone removed	open	removed	888	blue88841807	blue	L	5	RR		0	1	food	4	2	nest	2	3
2014-06-17	Afternoon	open - pheromone removed	open	removed	888	blue88841807	blue	L	6	LR		1	1	food	3	4	nest	2	0
2014-06-17	Afternoon	open - pheromone removed	open	removed	888	blue88841807	blue	L	7	LR		1	1	food	4		nest	1	2
2014-06-17	Afternoon	open - pheromone removed	open	removed	888	yellow88841807	yellow	L	0					food			nest	0
2014-06-17	Afternoon	open - pheromone removed	open	removed	888	yellow88841807	yellow	L	1	LR		1	1	food	0	0	nest	0
2014-06-17	Afternoon	open - pheromone removed	open	removed	888	yellow88841807	yellow	L	2	LR		1	1	food	0	0	nest	0	3
2014-06-17	Afternoon	open - pheromone removed	open	removed	888	yellow88841807	yellow	L	3	R*R	1	0	1	food	1	2	nest	1	3
2014-06-17	Afternoon	open - pheromone removed	open	removed	888	yellow88841807	yellow	L	4	R*R	1	0	1	food	2		nest	0
2014-06-17	Afternoon	open - pheromone removed	open	removed	888	yellow88841807	yellow	L	5	L*R	1	1	1	food	2	3	nest	2
2014-06-17	Afternoon	open - pheromone removed	open	removed	888	yellow88841807	yellow	L	6	LR		1	1	food	4	6	nest	4	3
2014-06-17	Afternoon	open - pheromone removed	open	removed	888	yellow88841807	yellow	L	7	R*R	1	0	1	food	9	5	nest
2014-06-17	Afternoon	open - pheromone removed	open	removed	888	green88841807	green	L	0					food			nest	1	7
2014-06-17	Afternoon	open - pheromone removed	open	removed	888	green88841807	green	L	1	RR		0	1	food	0	0	nest	2
2014-06-17	Afternoon	open - pheromone removed	open	removed	888	green88841807	green	L	2	R*R	1	0	1	food	0	0	nest	7	8
2014-06-17	Afternoon	open - pheromone removed	open	removed	888	green88841807	green	L	3	R*R	1	0	1	food		3	nest	1	2
2014-06-17	Afternoon	open - pheromone removed	open	removed	888	green88841807	green	L	4	LR		1	1	food	0	2	nest
2014-06-17	Afternoon	open - pheromone removed	open	removed	888	green88841807	green	L	5	R*L	1	0	0	food			nest	3	3
2014-06-17	Afternoon	open - pheromone removed	open	removed	888	green88841807	green	L	6	LR		1	1	food	0	0	nest	2	2
2014-06-17	Afternoon	open - pheromone removed	open	removed	888	green88841807	green	L	7	LR		1	1	food	2	3	nest	2	4
2014-06-17	Afternoon	open - pheromone removed	open	removed	888	red88841807	red	L	0					food			nest	0
2014-06-17	Afternoon	open - pheromone removed	open	removed	888	red88841807	red	L	1	RR		0	1	food	1	0	nest	6	3
2014-06-17	Afternoon	open - pheromone removed	open	removed	888	red88841807	red	L	2	RR		0	1	food		3	nest	0	2
2014-06-17	Afternoon	open - pheromone removed	open	removed	888	red88841807	red	L	3					food			nest
2014-06-17	Afternoon	open - pheromone removed	open	removed	888	red88841807	red	L	4					food			nest
2014-06-17	Afternoon	open - pheromone removed	open	removed	888	red88841807	red	L	5					food			nest
2014-06-17	Afternoon	open - pheromone removed	open	removed	888	red88841807	red	L	6					food			nest
2014-06-17	Afternoon	open - pheromone removed	open	removed	888	red88841807	red	L	7					food			nest
2014-06-17	Afternoon	open - pheromone removed	open	removed	888	orange88841807	orange	L	0					food			nest	3
2014-06-17	Afternoon	open - pheromone removed	open	removed	888	orange88841807	orange	L	1	LR		1	1	food	4	2	nest	2	4
2014-06-17	Afternoon	open - pheromone removed	open	removed	888	orange88841807	orange	L	2	LR		1	1	food			nest	6	4
2014-06-17	Afternoon	open - pheromone removed	open	removed	888	orange88841807	orange	L	3	R*R	1	0	1	food			nest	5	3
2014-06-17	Afternoon	open - pheromone removed	open	removed	888	orange88841807	orange	L	4	R*R	1	0	1	food	6	4	nest	0	3
2014-06-17	Afternoon	open - pheromone removed	open	removed	888	orange88841807	orange	L	5	R*L	1	0	0	food	4	2	nest	1
2014-06-17	Afternoon	open - pheromone removed	open	removed	888	orange88841807	orange	L	6	RR		0	1	food	3	4	nest	4	4
2014-06-17	Afternoon	open - pheromone removed	open	removed	888	orange88841807	orange	L	7	R*R	1	0	1	food	4		nest	6	3
2014-06-17	Afternoon	open - pheromone removed	open	removed	5	blue541807	blue	L	0					food			nest	0	2
2014-06-17	Afternoon	open - pheromone removed	open	removed	5	blue541807	blue	L	1	LR		1	1	food	1	0	nest	0
2014-06-17	Afternoon	open - pheromone removed	open	removed	5	blue541807	blue	L	2	RR		0	1	food			nest	2	1
2014-06-17	Afternoon	open - pheromone removed	open	removed	5	blue541807	blue	L	3	RR		0	1	food			nest	1	2
2014-06-17	Afternoon	open - pheromone removed	open	removed	5	blue541807	blue	L	4	R*R	1	0	1	food	0	0	nest
2014-06-17	Afternoon	open - pheromone removed	open	removed	5	blue541807	blue	L	5	RR		0	1	food	0	0	nest
2014-06-17	Afternoon	open - pheromone removed	open	removed	5	blue541807	blue	L	6	LR		1	1	food	0	0	nest	3	3
2014-06-17	Afternoon	open - pheromone removed	open	removed	5	blue541807	blue	L	7	RR		0	1	food	0	0	nest	4	3
2014-06-17	Afternoon	open - pheromone removed	open	removed	5	yellow541807	yellow	L	0					food			nest
2014-06-17	Afternoon	open - pheromone removed	open	removed	5	yellow541807	yellow	L	1	LR		1	1	food	0	0	nest	0	0
2014-06-17	Afternoon	open - pheromone removed	open	removed	5	yellow541807	yellow	L	2	LL		1	0	food	0	1	nest	5	5
2014-06-17	Afternoon	open - pheromone removed	open	removed	5	yellow541807	yellow	L	3	LL		1	0	food	0	1	nest	4
2014-06-17	Afternoon	open - pheromone removed	open	removed	5	yellow541807	yellow	L	4	L*L	1	1	0	food	1	0	nest	3	4
2014-06-17	Afternoon	open - pheromone removed	open	removed	5	yellow541807	yellow	L	5	R*R	1	0	1	food	0	0	nest	2	0
[truncated: 466 more rows]

## Sheet: stacked for bifurcation
Date	Time	Treatment	mazetreatment	pherotreatment	col	Ant	Colour	FeederPos	Trip	Decision	bifurcation	correct	correct	lays.to.food	lays.to.nest	Star
41772	Afternoon	confined - pheromone removed	confined	removed	C5	blue541772	blue	L	1	LR	1st	1	1		3
41772	Afternoon	confined - pheromone removed	confined	removed	C5	blue541772	blue	L	2	LR	1st	1	1	0	3
41772	Afternoon	confined - pheromone removed	confined	removed	C5	blue541772	blue	L	3	LR	1st	1	1		3
41772	Afternoon	confined - pheromone removed	confined	removed	C5	blue541772	blue	L	4	LR	1st	1	1
41772	Afternoon	confined - pheromone removed	confined	removed	C5	blue541772	blue	L	5	LR	1st	1	1
41772	Afternoon	confined - pheromone removed	confined	removed	C5	blue541772	blue	L	6	LR	1st	1	1		3
41772	Afternoon	confined - pheromone removed	confined	removed	C5	blue541772	blue	L	7	RL	1st	0	0
41772	Afternoon	confined - pheromone removed	confined	removed	C5	orange541772	orange	L	1	LR	1st	1	1		5
41772	Afternoon	confined - pheromone removed	confined	removed	C5	orange541772	orange	L	2	LR	1st	1	1	0
41772	Afternoon	confined - pheromone removed	confined	removed	C5	orange541772	orange	L	3	LR	1st	1	1
41772	Afternoon	confined - pheromone removed	confined	removed	C5	orange541772	orange	L	4	LR	1st	1	1	3	3
41772	Afternoon	confined - pheromone removed	confined	removed	C5	orange541772	orange	L	5	LR	1st	1	1		4
41772	Afternoon	confined - pheromone removed	confined	removed	C5	orange541772	orange	L	6	LR	1st	1	1
41772	Afternoon	confined - pheromone removed	confined	removed	C5	orange541772	orange	L	7	RR	1st	0	0		2
41772	Afternoon	confined - pheromone removed	confined	removed	C5	green541772	green	L	1	LR	1st	1	1	2
41772	Afternoon	confined - pheromone removed	confined	removed	C5	green541772	green	L	2	LR	1st	1	1
41772	Afternoon	confined - pheromone removed	confined	removed	C5	green541772	green	L	3	LR	1st	1	1	3	0
41772	Afternoon	confined - pheromone removed	confined	removed	C5	green541772	green	L	4	LR	1st	1	1
41772	Afternoon	confined - pheromone removed	confined	removed	C5	green541772	green	L	5	LR	1st	1	1	1	2
41772	Afternoon	confined - pheromone removed	confined	removed	C5	green541772	green	L	6	LR	1st	1	1
41772	Afternoon	confined - pheromone removed	confined	removed	C5	green541772	green	L	7	RR	1st	0	0	0	0
41772	Afternoon	confined - pheromone removed	confined	removed	C5	red541772	red	L	1	LR	1st	1	1	2
41772	Afternoon	confined - pheromone removed	confined	removed	C5	red541772	red	L	2	LR	1st	1	1		5
41772	Afternoon	confined - pheromone removed	confined	removed	C5	red541772	red	L	3	LR	1st	1	1	4	0
41772	Afternoon	confined - pheromone removed	confined	removed	C5	red541772	red	L	4	LR	1st	1	1		4
41772	Afternoon	confined - pheromone removed	confined	removed	C5	red541772	red	L	5	LR	1st	1	1
41772	Afternoon	confined - pheromone removed	confined	removed	C5	red541772	red	L	6	LR	1st	1	1		8
41772	Afternoon	confined - pheromone removed	confined	removed	C5	red541772	red	L	7	LR	1st	1	1		1
41772	Afternoon	confined - pheromone removed	confined	removed	C5	yellow541772	yellow	L	1	LR	1st	1	1		5
41772	Afternoon	confined - pheromone removed	confined	removed	C5	yellow541772	yellow	L	2	LR	1st	1	1	0
41772	Afternoon	confined - pheromone removed	confined	removed	C5	yellow541772	yellow	L	3	LR	1st	1	1
41772	Afternoon	confined - pheromone removed	confined	removed	C5	yellow541772	yellow	L	4	LR	1st	1	1	3	3
41772	Afternoon	confined - pheromone removed	confined	removed	C5	yellow541772	yellow	L	5	LR	1st	1	1		4
41772	Afternoon	confined - pheromone removed	confined	removed	C5	yellow541772	yellow	L	6	LR	1st	1	1
41772	Afternoon	confined - pheromone removed	confined	removed	C5	yellow541772	yellow	L	7	LL	1st	1	1		2
41772	Afternoon	confined - pheromone removed	confined	removed	C888	blue88841772	blue	L	1	LR	1st	1	1	0
41772	Afternoon	confined - pheromone removed	confined	removed	C888	blue88841772	blue	L	2	LR	1st	1	1		2
41772	Afternoon	confined - pheromone removed	confined	removed	C888	blue88841772	blue	L	3	LR	1st	1	1	3	0
41772	Afternoon	confined - pheromone removed	confined	removed	C888	blue88841772	blue	L	4	LR	1st	1	1		4
41772	Afternoon	confined - pheromone removed	confined	removed	C888	blue88841772	blue	L	5	LR	1st	1	1	4	4
41772	Afternoon	confined - pheromone removed	confined	removed	C888	blue88841772	blue	L	6	LR	1st	1	1		0
41772	Afternoon	confined - pheromone removed	confined	removed	C888	blue88841772	blue	L	7	LR	1st	1	1
41772	Afternoon	confined - pheromone removed	confined	removed	C888	orange88841772	orange	L	1	LR	1st	1	1	0
41772	Afternoon	confined - pheromone removed	confined	removed	C888	orange88841772	orange	L	2	LR	1st	1	1	2	0
41772	Afternoon	confined - pheromone removed	confined	removed	C888	orange88841772	orange	L	3	LR	1st	1	1	2
41772	Afternoon	confined - pheromone removed	confined	removed	C888	orange88841772	orange	L	4	LR	1st	1	1
41772	Afternoon	confined - pheromone removed	confined	removed	C888	orange88841772	orange	L	5	LR	1st	1	1		4
41772	Afternoon	confined - pheromone removed	confined	removed	C888	orange88841772	orange	L	6	LR	1st	1	1
41772	Afternoon	confined - pheromone removed	confined	removed	C888	orange88841772	orange	L	7	LL	1st	1	1	0	3
41772	Afternoon	confined - pheromone removed	confined	removed	C888	green88841772	green	L	1	LR	1st	1	1
41772	Afternoon	confined - pheromone removed	confined	removed	C888	green88841772	green	L	2	LR	1st	1	1
41772	Afternoon	confined - pheromone removed	confined	removed	C888	green88841772	green	L	3	LR	1st	1	1
41772	Afternoon	confined - pheromone removed	confined	removed	C888	green88841772	green	L	4	LR	1st	1	1
41772	Afternoon	confined - pheromone removed	confined	removed	C888	green88841772	green	L	5	LR	1st	1	1
41772	Afternoon	confined - pheromone removed	confined	removed	C888	green88841772	green	L	6	LR	1st	1	1	4	5
41772	Afternoon	confined - pheromone removed	confined	removed	C888	green88841772	green	L	7	LR	1st	1	1
41772	Afternoon	confined - pheromone removed	confined	removed	C888	red88841772	red	L	1	LR	1st	1	1	0	0
41772	Afternoon	confined - pheromone removed	confined	removed	C888	red88841772	red	L	2	LR	1st	1	1	3
41772	Afternoon	confined - pheromone removed	confined	removed	C888	red88841772	red	L	3	LR	1st	1	1		0
41772	Afternoon	confined - pheromone removed	confined	removed	C888	red88841772	red	L	4	LR	1st	1	1	4
41772	Afternoon	confined - pheromone removed	confined	removed	C888	red88841772	red	L	5	LR	1st	1	1	3	4
41772	Afternoon	confined - pheromone removed	confined	removed	C888	red88841772	red	L	6	LR	1st	1	1		5
41772	Afternoon	confined - pheromone removed	confined	removed	C888	red88841772	red	L	7	RL	1st	0	0	3	4
41772	Afternoon	confined - pheromone removed	confined	removed	C888	yellow88841772	yellow	L	1	LR	1st	1	1		2
41772	Afternoon	confined - pheromone removed	confined	removed	C888	yellow88841772	yellow	L	2	LR	1st	1	1
41772	Afternoon	confined - pheromone removed	confined	removed	C888	yellow88841772	yellow	L	3	LR	1st	1	1	2	6
41772	Afternoon	confined - pheromone removed	confined	removed	C888	yellow88841772	yellow	L	4	LR	1st	1	1		2
41772	Afternoon	confined - pheromone removed	confined	removed	C888	yellow88841772	yellow	L	5	LR	1st	1	1	3
41772	Afternoon	confined - pheromone removed	confined	removed	C888	yellow88841772	yellow	L	6	LR	1st	1	1		2
41772	Afternoon	confined - pheromone removed	confined	removed	C888	yellow88841772	yellow	L	7	LR	1st	1	1
41773	Morning	confined - pheromone removed	confined	removed	C6	blue641773	blue	L	1	LR	1st	1	1
41773	Morning	confined - pheromone removed	confined	removed	C6	blue641773	blue	L	2		1st
41773	Morning	confined - pheromone removed	confined	removed	C6	blue641773	blue	L	3		1st
41773	Morning	confined - pheromone removed	confined	removed	C6	blue641773	blue	L	4		1st
41773	Morning	confined - pheromone removed	confined	removed	C6	blue641773	blue	L	5		1st
41773	Morning	confined - pheromone removed	confined	removed	C6	blue641773	blue	L	6		1st
41773	Morning	confined - pheromone removed	confined	removed	C6	blue641773	blue	L	7		1st
41773	Morning	confined - pheromone removed	confined	removed	C6	orange641773	orange	L	1	LR	1st	1	1	0	4
41773	Morning	confined - pheromone removed	confined	removed	C6	orange641773	orange	L	2	LR	1st	1	1	1	4
41773	Morning	confined - pheromone removed	confined	removed	C6	orange641773	orange	L	3	LR	1st	1	1	0	0
41773	Morning	confined - pheromone removed	confined	removed	C6	orange641773	orange	L	4	LR	1st	1	1	0	6
41773	Morning	confined - pheromone removed	confined	removed	C6	orange641773	orange	L	5	LR	1st	1	1	0	5
41773	Morning	confined - pheromone removed	confined	removed	C6	orange641773	orange	L	6	LR	1st	1	1
41773	Morning	confined - pheromone removed	confined	removed	C6	orange641773	orange	L	7	RL	1st	0	0
41773	Morning	confined - pheromone removed	confined	removed	C6	green641773	green	L	1	LR	1st	1	1	0	0
41773	Morning	confined - pheromone removed	confined	removed	C6	green641773	green	L	2	LR	1st	1	1		0
41773	Morning	confined - pheromone removed	confined	removed	C6	green641773	green	L	3	LR	1st	1	1		0
41773	Morning	confined - pheromone removed	confined	removed	C6	green641773	green	L	4	LR	1st	1	1	0	0
41773	Morning	confined - pheromone removed	confined	removed	C6	green641773	green	L	5	LR	1st	1	1	0	0
41773	Morning	confined - pheromone removed	confined	removed	C6	green641773	green	L	6	LR	1st	1	1	0	1
41773	Morning	confined - pheromone removed	confined	removed	C6	green641773	green	L	7	RL	1st	0	0	0	0
41773	Morning	confined - pheromone removed	confined	removed	C6	red641773	red	L	1	LR	1st	1	1	0	0
41773	Morning	confined - pheromone removed	confined	removed	C6	red641773	red	L	2	LR	1st	1	1
41773	Morning	confined - pheromone removed	confined	removed	C6	red641773	red	L	3	LR	1st	1	1
41773	Morning	confined - pheromone removed	confined	removed	C6	red641773	red	L	4	LR	1st	1	1	0
41773	Morning	confined - pheromone removed	confined	removed	C6	red641773	red	L	5	LR	1st	1	1	3	5
41773	Morning	confined - pheromone removed	confined	removed	C6	red641773	red	L	6	LR	1st	1	1		7
41773	Morning	confined - pheromone removed	confined	removed	C6	red641773	red	L	7	RL	1st	0	0	0
41773	Morning	confined - pheromone removed	confined	removed	C6	yellow641773	yellow	L	1	LR	1st	1	1	0
41773	Morning	confined - pheromone removed	confined	removed	C6	yellow641773	yellow	L	2	LR	1st	1	1	0	0
41773	Morning	confined - pheromone removed	confined	removed	C6	yellow641773	yellow	L	3	LR	1st	1	1	0
41773	Morning	confined - pheromone removed	confined	removed	C6	yellow641773	yellow	L	4	LR	1st	1	1		0
41773	Morning	confined - pheromone removed	confined	removed	C6	yellow641773	yellow	L	5	LR	1st	1	1		4
41773	Morning	confined - pheromone removed	confined	removed	C6	yellow641773	yellow	L	6	LR	1st	1	1	1
41773	Morning	confined - pheromone removed	confined	removed	C6	yellow641773	yellow	L	7	RR	1st	0	0		1
41773	Afternoon	confined - pheromone removed	confined	removed	C3	blue341773	blue	L	1		1st
41773	Afternoon	confined - pheromone removed	confined	removed	C3	blue341773	blue	L	2		1st
41773	Afternoon	confined - pheromone removed	confined	removed	C3	blue341773	blue	L	3		1st
41773	Afternoon	confined - pheromone removed	confined	removed	C3	blue341773	blue	L	4		1st
41773	Afternoon	confined - pheromone removed	confined	removed	C3	blue341773	blue	L	5		1st
41773	Afternoon	confined - pheromone removed	confined	removed	C3	blue341773	blue	L	6		1st
41773	Afternoon	confined - pheromone removed	confined	removed	C3	blue341773	blue	L	7		1st
41773	Afternoon	confined - pheromone removed	confined	removed	C3	orange341773	orange	L	1	LR	1st	1	1
41773	Afternoon	confined - pheromone removed	confined	removed	C3	orange341773	orange	L	2	LR	1st	1	1	5	4
41773	Afternoon	confined - pheromone removed	confined	removed	C3	orange341773	orange	L	3	LR	1st	1	1		5
41773	Afternoon	confined - pheromone removed	confined	removed	C3	orange341773	orange	L	4	LR	1st	1	1	4	2
41773	Afternoon	confined - pheromone removed	confined	removed	C3	orange341773	orange	L	5	LR	1st	1	1		6
41773	Afternoon	confined - pheromone removed	confined	removed	C3	orange341773	orange	L	6	LR	1st	1	1		6
41773	Afternoon	confined - pheromone removed	confined	removed	C3	orange341773	orange	L	7	LR	1st	1	1		4
41773	Afternoon	confined - pheromone removed	confined	removed	C3	green341773	green	L	1	LR	1st	1	1	3
41773	Afternoon	confined - pheromone removed	confined	removed	C3	green341773	green	L	2	LR	1st	1	1	2	4
41773	Afternoon	confined - pheromone removed	confined	removed	C3	green341773	green	L	3	LR	1st	1	1		5
41773	Afternoon	confined - pheromone removed	confined	removed	C3	green341773	green	L	4	LR	1st	1	1	4
41773	Afternoon	confined - pheromone removed	confined	removed	C3	green341773	green	L	5	LR	1st	1	1	3	4
41773	Afternoon	confined - pheromone removed	confined	removed	C3	green341773	green	L	6	LR	1st	1	1	3
41773	Afternoon	confined - pheromone removed	confined	removed	C3	green341773	green	L	7	RL	1st	0	0	0	2
41773	Afternoon	confined - pheromone removed	confined	removed	C3	red341773	red	L	1	LR	1st	1	1
41773	Afternoon	confined - pheromone removed	confined	removed	C3	red341773	red	L	2	LR	1st	1	1	4	4
41773	Afternoon	confined - pheromone removed	confined	removed	C3	red341773	red	L	3	LR	1st	1	1	3	6
41773	Afternoon	confined - pheromone removed	confined	removed	C3	red341773	red	L	4	LR	1st	1	1	4	2
41773	Afternoon	confined - pheromone removed	confined	removed	C3	red341773	red	L	5	LR	1st	1	1		7
41773	Afternoon	confined - pheromone removed	confined	removed	C3	red341773	red	L	6	LR	1st	1	1	4
41773	Afternoon	confined - pheromone removed	confined	removed	C3	red341773	red	L	7	RL	1st	0	0		3
41773	Afternoon	confined - pheromone removed	confined	removed	C3	yellow341773	yellow	L	1		1st
41773	Afternoon	confined - pheromone removed	confined	removed	C3	yellow341773	yellow	L	2		1st
41773	Afternoon	confined - pheromone removed	confined	removed	C3	yellow341773	yellow	L	3		1st
41773	Afternoon	confined - pheromone removed	confined	removed	C3	yellow341773	yellow	L	4		1st
41773	Afternoon	confined - pheromone removed	confined	removed	C3	yellow341773	yellow	L	5		1st
41773	Afternoon	confined - pheromone removed	confined	removed	C3	yellow341773	yellow	L	6		1st
41773	Afternoon	confined - pheromone removed	confined	removed	C3	yellow341773	yellow	L	7		1st
41774	Morning	confined - pheromone removed	confined	removed	C12	blue1241774	blue	L	1	LR	1st	1	1
41774	Morning	confined - pheromone removed	confined	removed	C12	blue1241774	blue	L	2	LR	1st	1	1
41774	Morning	confined - pheromone removed	confined	removed	C12	blue1241774	blue	L	3	LR	1st	1	1
41774	Morning	confined - pheromone removed	confined	removed	C12	blue1241774	blue	L	4	LR	1st	1	1
41774	Morning	confined - pheromone removed	confined	removed	C12	blue1241774	blue	L	5	LR	1st	1	1
41774	Morning	confined - pheromone removed	confined	removed	C12	blue1241774	blue	L	6	LR	1st	1	1
41774	Morning	confined - pheromone removed	confined	removed	C12	blue1241774	blue	L	7	RL	1st	0	0
41774	Morning	confined - pheromone removed	confined	removed	C12	orange1241774	orange	L	1	LR	1st	1	1
41774	Morning	confined - pheromone removed	confined	removed	C12	orange1241774	orange	L	2	LR	1st	1	1	2
41774	Morning	confined - pheromone removed	confined	removed	C12	orange1241774	orange	L	3	LR	1st	1	1		5
41774	Morning	confined - pheromone removed	confined	removed	C12	orange1241774	orange	L	4	LR	1st	1	1	3	4
41774	Morning	confined - pheromone removed	confined	removed	C12	orange1241774	orange	L	5	LR	1st	1	1	3
41774	Morning	confined - pheromone removed	confined	removed	C12	orange1241774	orange	L	6	LR	1st	1	1	0	5
41774	Morning	confined - pheromone removed	confined	removed	C12	orange1241774	orange	L	7	RL	1st	0	0	1	4
41774	Morning	confined - pheromone removed	confined	removed	C12	green1241774	green	L	1	LR	1st	1	1	0	0
41774	Morning	confined - pheromone removed	confined	removed	C12	green1241774	green	L	2	LR	1st	1	1	2	2
41774	Morning	confined - pheromone removed	confined	removed	C12	green1241774	green	L	3	LR	1st	1	1
41774	Morning	confined - pheromone removed	confined	removed	C12	green1241774	green	L	4	LR	1st	1	1
41774	Morning	confined - pheromone removed	confined	removed	C12	green1241774	green	L	5	LR	1st	1	1	4	4
41774	Morning	confined - pheromone removed	confined	removed	C12	green1241774	green	L	6	LR	1st	1	1	2	2
41774	Morning	confined - pheromone removed	confined	removed	C12	green1241774	green	L	7	RR	1st	0	0	3	3
41774	Morning	confined - pheromone removed	confined	removed	C12	red1241774	red	L	1	LR	1st	1	1	0	0
41774	Morning	confined - pheromone removed	confined	removed	C12	red1241774	red	L	2	LR	1st	1	1	0
41774	Morning	confined - pheromone removed	confined	removed	C12	red1241774	red	L	3	LR	1st	1	1	0
41774	Morning	confined - pheromone removed	confined	removed	C12	red1241774	red	L	4	LR	1st	1	1	0
41774	Morning	confined - pheromone removed	confined	removed	C12	red1241774	red	L	5	LR	1st	1	1		1
41774	Morning	confined - pheromone removed	confined	removed	C12	red1241774	red	L	6	LR	1st	1	1	2	0
41774	Morning	confined - pheromone removed	confined	removed	C12	red1241774	red	L	7	RR	1st	0	0	0	3
41774	Morning	confined - pheromone removed	confined	removed	C12	yellow1241774	yellow	L	1	LR	1st	1	1	0	0
41774	Morning	confined - pheromone removed	confined	removed	C12	yellow1241774	yellow	L	2	LR	1st	1	1	2	6
41774	Morning	confined - pheromone removed	confined	removed	C12	yellow1241774	yellow	L	3	LR	1st	1	1
41774	Morning	confined - pheromone removed	confined	removed	C12	yellow1241774	yellow	L	4	LR	1st	1	1	0	0
41774	Morning	confined - pheromone removed	confined	removed	C12	yellow1241774	yellow	L	5	LR	1st	1	1	3	5
41774	Morning	confined - pheromone removed	confined	removed	C12	yellow1241774	yellow	L	6	LR	1st	1	1	2	3
41774	Morning	confined - pheromone removed	confined	removed	C12	yellow1241774	yellow	L	7	RR	1st	0	0		0
41774	Afternoon	confined - pheromone removed	confined	removed	C11	blue1141774	blue	R	1	RL	1st	1	1
41774	Afternoon	confined - pheromone removed	confined	removed	C11	blue1141774	blue	R	2	RL	1st	1	1
41774	Afternoon	confined - pheromone removed	confined	removed	C11	blue1141774	blue	R	3	RL	1st	1	1	3	5
41774	Afternoon	confined - pheromone removed	confined	removed	C11	blue1141774	blue	R	4	RL	1st	1	1	3	3
41774	Afternoon	confined - pheromone removed	confined	removed	C11	blue1141774	blue	R	5	RL	1st	1	1	2
41774	Afternoon	confined - pheromone removed	confined	removed	C11	blue1141774	blue	R	6	RL	1st	1	1		7
41774	Afternoon	confined - pheromone removed	confined	removed	C11	blue1141774	blue	R	7	LL	1st	0	0		6
41774	Afternoon	confined - pheromone removed	confined	removed	C11	orange1141774	orange	R	1	RL	1st	1	1
41774	Afternoon	confined - pheromone removed	confined	removed	C11	orange1141774	orange	R	2	RL	1st	1	1	0
41774	Afternoon	confined - pheromone removed	confined	removed	C11	orange1141774	orange	R	3	RL	1st	1	1	0
41774	Afternoon	confined - pheromone removed	confined	removed	C11	orange1141774	orange	R	4	RL	1st	1	1	7	7
41774	Afternoon	confined - pheromone removed	confined	removed	C11	orange1141774	orange	R	5	RL	1st	1	1	0
41774	Afternoon	confined - pheromone removed	confined	removed	C11	orange1141774	orange	R	6	RL	1st	1	1		5
41774	Afternoon	confined - pheromone removed	confined	removed	C11	orange1141774	orange	R	7	LR	1st	0	0
41774	Afternoon	confined - pheromone removed	confined	removed	C11	green1141774	green	R	1	RL	1st	1	1		0
41774	Afternoon	confined - pheromone removed	confined	removed	C11	green1141774	green	R	2	RL	1st	1	1
41774	Afternoon	confined - pheromone removed	confined	removed	C11	green1141774	green	R	3	RL	1st	1	1		2
41774	Afternoon	confined - pheromone removed	confined	removed	C11	green1141774	green	R	4	RL	1st	1	1	4
41774	Afternoon	confined - pheromone removed	confined	removed	C11	green1141774	green	R	5	RL	1st	1	1		6
41774	Afternoon	confined - pheromone removed	confined	removed	C11	green1141774	green	R	6	RL	1st	1	1		12
41774	Afternoon	confined - pheromone removed	confined	removed	C11	green1141774	green	R	7	RL	1st	1	1	4
41774	Afternoon	confined - pheromone removed	confined	removed	C11	red1141774	red	R	1	RL	1st	1	1
41774	Afternoon	confined - pheromone removed	confined	removed	C11	red1141774	red	R	2	RL	1st	1	1
41774	Afternoon	confined - pheromone removed	confined	removed	C11	red1141774	red	R	3	RL	1st	1	1		5
41774	Afternoon	confined - pheromone removed	confined	removed	C11	red1141774	red	R	4	RL	1st	1	1
41774	Afternoon	confined - pheromone removed	confined	removed	C11	red1141774	red	R	5	RL	1st	1	1		10
41774	Afternoon	confined - pheromone removed	confined	removed	C11	red1141774	red	R	6	RL	1st	1	1
41774	Afternoon	confined - pheromone removed	confined	removed	C11	red1141774	red	R	7	RL	1st	1	1		5
41774	Afternoon	confined - pheromone removed	confined	removed	C11	yellow1141774	yellow	R	1	RL	1st	1	1	0	4
41774	Afternoon	confined - pheromone removed	confined	removed	C11	yellow1141774	yellow	R	2	RL	1st	1	1
41774	Afternoon	confined - pheromone removed	confined	removed	C11	yellow1141774	yellow	R	3	RL	1st	1	1
41774	Afternoon	confined - pheromone removed	confined	removed	C11	yellow1141774	yellow	R	4	RL	1st	1	1	4	2
41774	Afternoon	confined - pheromone removed	confined	removed	C11	yellow1141774	yellow	R	5	RL	1st	1	1	5	3
41774	Afternoon	confined - pheromone removed	confined	removed	C11	yellow1141774	yellow	R	6	RL	1st	1	1
41774	Afternoon	confined - pheromone removed	confined	removed	C11	yellow1141774	yellow	R	7	LL	1st	0	0	4	4
41779	Morning	confined - pheromone removed	confined	removed	C5	blue541779	blue	R	1	RL	1st	1	1	3
41779	Morning	confined - pheromone removed	confined	removed	C5	blue541779	blue	R	2	RL	1st	1	1	4	3
41779	Morning	confined - pheromone removed	confined	removed	C5	blue541779	blue	R	3	RL	1st	1	1	5	6
41779	Morning	confined - pheromone removed	confined	removed	C5	blue541779	blue	R	4	RL	1st	1	1
41779	Morning	confined - pheromone removed	confined	removed	C5	blue541779	blue	R	5	RL	1st	1	1	6	7
41779	Morning	confined - pheromone removed	confined	removed	C5	blue541779	blue	R	6	RL	1st	1	1
41779	Morning	confined - pheromone removed	confined	removed	C5	blue541779	blue	R	7	LL	1st	0	0
41779	Morning	confined - pheromone removed	confined	removed	C5	orange541779	orange	R	1	RL	1st	1	1	7
41779	Morning	confined - pheromone removed	confined	removed	C5	orange541779	orange	R	2	RL	1st	1	1	1
41779	Morning	confined - pheromone removed	confined	removed	C5	orange541779	orange	R	3	RL	1st	1	1	0
41779	Morning	confined - pheromone removed	confined	removed	C5	orange541779	orange	R	4	RL	1st	1	1		3
41779	Morning	confined - pheromone removed	confined	removed	C5	orange541779	orange	R	5	RL	1st	1	1		5
41779	Morning	confined - pheromone removed	confined	removed	C5	orange541779	orange	R	6	RL	1st	1	1		2
41779	Morning	confined - pheromone removed	confined	removed	C5	orange541779	orange	R	7	LL	1st	0	0
41779	Morning	confined - pheromone removed	confined	removed	C5	green541779	green	R	1	RL	1st	1	1		3
41779	Morning	confined - pheromone removed	confined	removed	C5	green541779	green	R	2	RL	1st	1	1		2
41779	Morning	confined - pheromone removed	confined	removed	C5	green541779	green	R	3	RL	1st	1	1	0
41779	Morning	confined - pheromone removed	confined	removed	C5	green541779	green	R	4	RL	1st	1	1		9
41779	Morning	confined - pheromone removed	confined	removed	C5	green541779	green	R	5	RL	1st	1	1	5	3
41779	Morning	confined - pheromone removed	confined	removed	C5	green541779	green	R	6	RL	1st	1	1
41779	Morning	confined - pheromone removed	confined	removed	C5	green541779	green	R	7	LL	1st	0	0		4
41779	Morning	confined - pheromone removed	confined	removed	C5	red541779	red	R	1	RL	1st	1	1		0
41779	Morning	confined - pheromone removed	confined	removed	C5	red541779	red	R	2	RL	1st	1	1
41779	Morning	confined - pheromone removed	confined	removed	C5	red541779	red	R	3	RL	1st	1	1
41779	Morning	confined - pheromone removed	confined	removed	C5	red541779	red	R	4	RL	1st	1	1		2
41779	Morning	confined - pheromone removed	confined	removed	C5	red541779	red	R	5	RL	1st	1	1
41779	Morning	confined - pheromone removed	confined	removed	C5	red541779	red	R	6	RL	1st	1	1
41779	Morning	confined - pheromone removed	confined	removed	C5	red541779	red	R	7	LR	1st	0	0
41779	Morning	confined - pheromone removed	confined	removed	C5	yellow541779	yellow	R	1	RL	1st	1	1		0
41779	Morning	confined - pheromone removed	confined	removed	C5	yellow541779	yellow	R	2	RL	1st	1	1	0
41779	Morning	confined - pheromone removed	confined	removed	C5	yellow541779	yellow	R	3	RL	1st	1	1	1
41779	Morning	confined - pheromone removed	confined	removed	C5	yellow541779	yellow	R	4		1st				0
41779	Morning	confined - pheromone removed	confined	removed	C5	yellow541779	yellow	R	5		1st
41779	Morning	confined - pheromone removed	confined	removed	C5	yellow541779	yellow	R	6		1st
41779	Morning	confined - pheromone removed	confined	removed	C5	yellow541779	yellow	R	7		1st
41779	Morning	confined - pheromone removed	confined	removed	C888	blue88841779	blue	R	1	RL	1st	1	1		0
41779	Morning	confined - pheromone removed	confined	removed	C888	blue88841779	blue	R	2	RL	1st	1	1	0
41779	Morning	confined - pheromone removed	confined	removed	C888	blue88841779	blue	R	3	RL	1st	1	1		6
41779	Morning	confined - pheromone removed	confined	removed	C888	blue88841779	blue	R	4	RL	1st	1	1
41779	Morning	confined - pheromone removed	confined	removed	C888	blue88841779	blue	R	5	RL	1st	1	1
41779	Morning	confined - pheromone removed	confined	removed	C888	blue88841779	blue	R	6		1st				5
41779	Morning	confined - pheromone removed	confined	removed	C888	blue88841779	blue	R	7		1st
41779	Morning	confined - pheromone removed	confined	removed	C888	orange88841779	orange	R	1	RL	1st	1	1	0
41779	Morning	confined - pheromone removed	confined	removed	C888	orange88841779	orange	R	2	RL	1st	1	1	3
41779	Morning	confined - pheromone removed	confined	removed	C888	orange88841779	orange	R	3	RL	1st	1	1	0	0
41779	Morning	confined - pheromone removed	confined	removed	C888	orange88841779	orange	R	4	RL	1st	1	1		4
41779	Morning	confined - pheromone removed	confined	removed	C888	orange88841779	orange	R	5	RL	1st	1	1	4	3
41779	Morning	confined - pheromone removed	confined	removed	C888	orange88841779	orange	R	6	RL	1st	1	1		4
41779	Morning	confined - pheromone removed	confined	removed	C888	orange88841779	orange	R	7	LL	1st	0	0		0
41779	Morning	confined - pheromone removed	confined	removed	C888	green88841779	green	R	1	RL	1st	1	1
41779	Morning	confined - pheromone removed	confined	removed	C888	green88841779	green	R	2	RL	1st	1	1	3	0
41779	Morning	confined - pheromone removed	confined	removed	C888	green88841779	green	R	3	RL	1st	1	1		3
41779	Morning	confined - pheromone removed	confined	removed	C888	green88841779	green	R	4	RL	1st	1	1	2	3
41779	Morning	confined - pheromone removed	confined	removed	C888	green88841779	green	R	5	RL	1st	1	1	0	3
41779	Morning	confined - pheromone removed	confined	removed	C888	green88841779	green	R	6	RL	1st	1	1
41779	Morning	confined - pheromone removed	confined	removed	C888	green88841779	green	R	7	LL	1st	0	0
41779	Morning	confined - pheromone removed	confined	removed	C888	red88841779	red	R	1	RL	1st	1	1	0
41779	Morning	confined - pheromone removed	confined	removed	C888	red88841779	red	R	2	RL	1st	1	1
41779	Morning	confined - pheromone removed	confined	removed	C888	red88841779	red	R	3	RL	1st	1	1
41779	Morning	confined - pheromone removed	confined	removed	C888	red88841779	red	R	4	RL	1st	1	1		4
41779	Morning	confined - pheromone removed	confined	removed	C888	red88841779	red	R	5	RL	1st	1	1
41779	Morning	confined - pheromone removed	confined	removed	C888	red88841779	red	R	6	RL	1st	1	1	0
41779	Morning	confined - pheromone removed	confined	removed	C888	red88841779	red	R	7	LL	1st	0	0	0	0
41779	Morning	confined - pheromone removed	confined	removed	C888	yellow88841779	yellow	R	1	RL	1st	1	1	3
41779	Morning	confined - pheromone removed	confined	removed	C888	yellow88841779	yellow	R	2	RL	1st	1	1	0	4
41779	Morning	confined - pheromone removed	confined	removed	C888	yellow88841779	yellow	R	3	RL	1st	1	1
41779	Morning	confined - pheromone removed	confined	removed	C888	yellow88841779	yellow	R	4	RL	1st	1	1	0	4
41779	Morning	confined - pheromone removed	confined	removed	C888	yellow88841779	yellow	R	5	RL	1st	1	1
41779	Morning	confined - pheromone removed	confined	removed	C888	yellow88841779	yellow	R	6	RL	1st	1	1	0	4
41779	Morning	confined - pheromone removed	confined	removed	C888	yellow88841779	yellow	R	7	RR	1st	1	1
41780	Afternoon	confined - pheromone removed	confined	removed	C3	blue341780	blue	R	1	RL	1st	1	1		0
41780	Afternoon	confined - pheromone removed	confined	removed	C3	blue341780	blue	R	2	RL	1st	1	1		2
41780	Afternoon	confined - pheromone removed	confined	removed	C3	blue341780	blue	R	3	RL	1st	1	1		6
41780	Afternoon	confined - pheromone removed	confined	removed	C3	blue341780	blue	R	4	RL	1st	1	1	3	6
41780	Afternoon	confined - pheromone removed	confined	removed	C3	blue341780	blue	R	5	RL	1st	1	1		4
41780	Afternoon	confined - pheromone removed	confined	removed	C3	blue341780	blue	R	6	RL	1st	1	1		5
41780	Afternoon	confined - pheromone removed	confined	removed	C3	blue341780	blue	R	7	LR	1st	0	0	0	4
41780	Afternoon	confined - pheromone removed	confined	removed	C3	orange341780	orange	R	1	RL	1st	1	1
41780	Afternoon	confined - pheromone removed	confined	removed	C3	orange341780	orange	R	2	RL	1st	1	1	0
41780	Afternoon	confined - pheromone removed	confined	removed	C3	orange341780	orange	R	3	RL	1st	1	1		2
41780	Afternoon	confined - pheromone removed	confined	removed	C3	orange341780	orange	R	4	RL	1st	1	1
41780	Afternoon	confined - pheromone removed	confined	removed	C3	orange341780	orange	R	5	RL	1st	1	1		1
41780	Afternoon	confined - pheromone removed	confined	removed	C3	orange341780	orange	R	6	RL	1st	1	1
41780	Afternoon	confined - pheromone removed	confined	removed	C3	orange341780	orange	R	7	LL	1st	0	0	0
41780	Afternoon	confined - pheromone removed	confined	removed	C3	green341780	green	R	1	RL	1st	1	1	2	3
41780	Afternoon	confined - pheromone removed	confined	removed	C3	green341780	green	R	2	RL	1st	1	1	5
41780	Afternoon	confined - pheromone removed	confined	removed	C3	green341780	green	R	3	RL	1st	1	1	4	5
41780	Afternoon	confined - pheromone removed	confined	removed	C3	green341780	green	R	4	RL	1st	1	1	0
41780	Afternoon	confined - pheromone removed	confined	removed	C3	green341780	green	R	5	RL	1st	1	1		0
41780	Afternoon	confined - pheromone removed	confined	removed	C3	green341780	green	R	6	RL	1st	1	1		2
41780	Afternoon	confined - pheromone removed	confined	removed	C3	green341780	green	R	7	LL	1st	0	0	0	3
41780	Afternoon	confined - pheromone removed	confined	removed	C3	red341780	red	R	1	RL	1st	1	1		4
41780	Afternoon	confined - pheromone removed	confined	removed	C3	red341780	red	R	2	RL	1st	1	1		6
41780	Afternoon	confined - pheromone removed	confined	removed	C3	red341780	red	R	3	RL	1st	1	1		6
41780	Afternoon	confined - pheromone removed	confined	removed	C3	red341780	red	R	4	RL	1st	1	1	5	4
41780	Afternoon	confined - pheromone removed	confined	removed	C3	red341780	red	R	5	RL	1st	1	1
41780	Afternoon	confined - pheromone removed	confined	removed	C3	red341780	red	R	6	RL	1st	1	1
41780	Afternoon	confined - pheromone removed	confined	removed	C3	red341780	red	R	7	RL	1st	1	1	0
41780	Afternoon	confined - pheromone removed	confined	removed	C3	yellow341780	yellow	R	1	RL	1st	1	1	0	0
41780	Afternoon	confined - pheromone removed	confined	removed	C3	yellow341780	yellow	R	2	RL	1st	1	1	2	5
41780	Afternoon	confined - pheromone removed	confined	removed	C3	yellow341780	yellow	R	3	RL	1st	1	1	2	5
41780	Afternoon	confined - pheromone removed	confined	removed	C3	yellow341780	yellow	R	4	RL	1st	1	1		6
41780	Afternoon	confined - pheromone removed	confined	removed	C3	yellow341780	yellow	R	5	RL	1st	1	1		6
41780	Afternoon	confined - pheromone removed	confined	removed	C3	yellow341780	yellow	R	6		1st				6
41780	Afternoon	confined - pheromone removed	confined	removed	C3	yellow341780	yellow	R	7		1st
41780	Afternoon	confined - pheromone removed	confined	removed	CRGB8	blueRGB841780	blue	L	1	LR	1st	1	1		0
41780	Afternoon	confined - pheromone removed	confined	removed	CRGB8	blueRGB841780	blue	L	2	LR	1st	1	1
41780	Afternoon	confined - pheromone removed	confined	removed	CRGB8	blueRGB841780	blue	L	3	LR	1st	1	1	3	2
41780	Afternoon	confined - pheromone removed	confined	removed	CRGB8	blueRGB841780	blue	L	4	LR	1st	1	1	0
41780	Afternoon	confined - pheromone removed	confined	removed	CRGB8	blueRGB841780	blue	L	5	LR	1st	1	1
41780	Afternoon	confined - pheromone removed	confined	removed	CRGB8	blueRGB841780	blue	L	6	LR	1st	1	1	3
41780	Afternoon	confined - pheromone removed	confined	removed	CRGB8	blueRGB841780	blue	L	7	RR	1st	0	0	0	1
41780	Afternoon	confined - pheromone removed	confined	removed	CRGB8	orangeRGB841780	orange	L	1	LR	1st	1	1	0
41780	Afternoon	confined - pheromone removed	confined	removed	CRGB8	orangeRGB841780	orange	L	2	LR	1st	1	1
41780	Afternoon	confined - pheromone removed	confined	removed	CRGB8	orangeRGB841780	orange	L	3	LR	1st	1	1	3	5
41780	Afternoon	confined - pheromone removed	confined	removed	CRGB8	orangeRGB841780	orange	L	4	LR	1st	1	1
41780	Afternoon	confined - pheromone removed	confined	removed	CRGB8	orangeRGB841780	orange	L	5	LR	1st	1	1		0
41780	Afternoon	confined - pheromone removed	confined	removed	CRGB8	orangeRGB841780	orange	L	6	LR	1st	1	1	3
41780	Afternoon	confined - pheromone removed	confined	removed	CRGB8	orangeRGB841780	orange	L	7	RR	1st	1	1	2
41780	Afternoon	confined - pheromone removed	confined	removed	CRGB8	greenRGB841780	green	L	1	LR	1st	1	1	9
41780	Afternoon	confined - pheromone removed	confined	removed	CRGB8	greenRGB841780	green	L	2	LR	1st	1	1		10
41780	Afternoon	confined - pheromone removed	confined	removed	CRGB8	greenRGB841780	green	L	3		1st
41780	Afternoon	confined - pheromone removed	confined	removed	CRGB8	greenRGB841780	green	L	4		1st
41780	Afternoon	confined - pheromone removed	confined	removed	CRGB8	greenRGB841780	green	L	5		1st
41780	Afternoon	confined - pheromone removed	confined	removed	CRGB8	greenRGB841780	green	L	6		1st
41780	Afternoon	confined - pheromone removed	confined	removed	CRGB8	greenRGB841780	green	L	7		1st
41780	Afternoon	confined - pheromone removed	confined	removed	CRGB8	redRGB841780	red	L	1	LR	1st	1	1		0
41780	Afternoon	confined - pheromone removed	confined	removed	CRGB8	redRGB841780	red	L	2	LR	1st	1	1
41780	Afternoon	confined - pheromone removed	confined	removed	CRGB8	redRGB841780	red	L	3	LR	1st	1	1	0	0
41780	Afternoon	confined - pheromone removed	confined	removed	CRGB8	redRGB841780	red	L	4	LR	1st	1	1	4
41780	Afternoon	confined - pheromone removed	confined	removed	CRGB8	redRGB841780	red	L	5	LR	1st	1	1		3
41780	Afternoon	confined - pheromone removed	confined	removed	CRGB8	redRGB841780	red	L	6	LR	1st	1	1	3	2
41780	Afternoon	confined - pheromone removed	confined	removed	CRGB8	redRGB841780	red	L	7	RR	1st	0	0		0
41780	Afternoon	confined - pheromone removed	confined	removed	CRGB8	yellowRGB841780	yellow	L	1	LR	1st	1	1	0
41780	Afternoon	confined - pheromone removed	confined	removed	CRGB8	yellowRGB841780	yellow	L	2	LR	1st	1	1		4
41780	Afternoon	confined - pheromone removed	confined	removed	CRGB8	yellowRGB841780	yellow	L	3	LR	1st	1	1		3
41780	Afternoon	confined - pheromone removed	confined	removed	CRGB8	yellowRGB841780	yellow	L	4	LR	1st	1	1
41780	Afternoon	confined - pheromone removed	confined	removed	CRGB8	yellowRGB841780	yellow	L	5	LR	1st	1	1
41780	Afternoon	confined - pheromone removed	confined	removed	CRGB8	yellowRGB841780	yellow	L	6	LR	1st	1	1		2
41780	Afternoon	confined - pheromone removed	confined	removed	CRGB8	yellowRGB841780	yellow	L	7	RR	1st	0	0	0
41780	Afternoon	confined - pheromone removed	confined	removed	C6	blue641780	blue	L	1	LR	1st	1	1	0
41780	Afternoon	confined - pheromone removed	confined	removed	C6	blue641780	blue	L	2	LR	1st	1	1	0
41780	Afternoon	confined - pheromone removed	confined	removed	C6	blue641780	blue	L	3		1st
41780	Afternoon	confined - pheromone removed	confined	removed	C6	blue641780	blue	L	4		1st
41780	Afternoon	confined - pheromone removed	confined	removed	C6	blue641780	blue	L	5		1st
41780	Afternoon	confined - pheromone removed	confined	removed	C6	blue641780	blue	L	6		1st
41780	Afternoon	confined - pheromone removed	confined	removed	C6	blue641780	blue	L	7		1st
41780	Afternoon	confined - pheromone removed	confined	removed	C6	orange641780	orange	L	1	LR	1st	1	1	0
41780	Afternoon	confined - pheromone removed	confined	removed	C6	orange641780	orange	L	2	LR	1st	1	1
41780	Afternoon	confined - pheromone removed	confined	removed	C6	orange641780	orange	L	3	LR	1st	1	1	0	0
41780	Afternoon	confined - pheromone removed	confined	removed	C6	orange641780	orange	L	4	LR	1st	1	1		0
41780	Afternoon	confined - pheromone removed	confined	removed	C6	orange641780	orange	L	5	LR	1st	1	1	0	0
41780	Afternoon	confined - pheromone removed	confined	removed	C6	orange641780	orange	L	6	LR	1st	1	1	0	0
41780	Afternoon	confined - pheromone removed	confined	removed	C6	orange641780	orange	L	7	RR	1st	0	0	0	0
41780	Afternoon	confined - pheromone removed	confined	removed	C6	green641780	green	L	1	LR	1st	1	1		0
41780	Afternoon	confined - pheromone removed	confined	removed	C6	green641780	green	L	2	LR	1st	1	1	0	10
41780	Afternoon	confined - pheromone removed	confined	removed	C6	green641780	green	L	3	LR	1st	1	1
41780	Afternoon	confined - pheromone removed	confined	removed	C6	green641780	green	L	4	LR	1st	1	1	0
41780	Afternoon	confined - pheromone removed	confined	removed	C6	green641780	green	L	5	LR	1st	1	1	0	0
41780	Afternoon	confined - pheromone removed	confined	removed	C6	green641780	green	L	6	LR	1st	1	1		0
41780	Afternoon	confined - pheromone removed	confined	removed	C6	green641780	green	L	7	LR	1st	1	1	0	0
41780	Afternoon	confined - pheromone removed	confined	removed	C6	red641780	red	L	1	LR	1st	1	1
41780	Afternoon	confined - pheromone removed	confined	removed	C6	red641780	red	L	2	LR	1st	1	1		0
41780	Afternoon	confined - pheromone removed	confined	removed	C6	red641780	red	L	3	LR	1st	1	1
41780	Afternoon	confined - pheromone removed	confined	removed	C6	red641780	red	L	4	LR	1st	1	1
41780	Afternoon	confined - pheromone removed	confined	removed	C6	red641780	red	L	5	LR	1st	1	1	0
41780	Afternoon	confined - pheromone removed	confined	removed	C6	red641780	red	L	6	LR	1st	1	1	0	1
41780	Afternoon	confined - pheromone removed	confined	removed	C6	red641780	red	L	7	RR	1st	0	0	0	1
41780	Afternoon	confined - pheromone removed	confined	removed	C6	yellow641780	yellow	L	1	LR	1st	1	1		0
41780	Afternoon	confined - pheromone removed	confined	removed	C6	yellow641780	yellow	L	2	LR	1st	1	1		0
41780	Afternoon	confined - pheromone removed	confined	removed	C6	yellow641780	yellow	L	3	LR	1st	1	1
41780	Afternoon	confined - pheromone removed	confined	removed	C6	yellow641780	yellow	L	4	LR	1st	1	1		1
41780	Afternoon	confined - pheromone removed	confined	removed	C6	yellow641780	yellow	L	5	LR	1st	1	1		2
41780	Afternoon	confined - pheromone removed	confined	removed	C6	yellow641780	yellow	L	6	LR	1st	1	1
41780	Afternoon	confined - pheromone removed	confined	removed	C6	yellow641780	yellow	L	7	RR	1st	0	0	2	2
41781	Afternoon	confined - pheromone removed	confined	removed	C11	silver1141781	silver	L	1	LR	1st	1	1	3	4
41781	Afternoon	confined - pheromone removed	confined	removed	C11	silver1141781	silver	L	2	LR	1st	1	1	2	5
41781	Afternoon	confined - pheromone removed	confined	removed	C11	silver1141781	silver	L	3	LR	1st	1	1		7
41781	Afternoon	confined - pheromone removed	confined	removed	C11	silver1141781	silver	L	4	LR	1st	1	1	2	6
41781	Afternoon	confined - pheromone removed	confined	removed	C11	silver1141781	silver	L	5	LR	1st	1	1	2
41781	Afternoon	confined - pheromone removed	confined	removed	C11	silver1141781	silver	L	6	LR	1st	1	1		7
41781	Afternoon	confined - pheromone removed	confined	removed	C11	silver1141781	silver	L	7	RR	1st	0	0	6
41781	Afternoon	confined - pheromone removed	confined	removed	C11	orange1141781	orange	L	1		1st
41781	Afternoon	confined - pheromone removed	confined	removed	C11	orange1141781	orange	L	2		1st
41781	Afternoon	confined - pheromone removed	confined	removed	C11	orange1141781	orange	L	3		1st
41781	Afternoon	confined - pheromone removed	confined	removed	C11	orange1141781	orange	L	4		1st
41781	Afternoon	confined - pheromone removed	confined	removed	C11	orange1141781	orange	L	5		1st
41781	Afternoon	confined - pheromone removed	confined	removed	C11	orange1141781	orange	L	6		1st
41781	Afternoon	confined - pheromone removed	confined	removed	C11	orange1141781	orange	L	7		1st
41781	Afternoon	confined - pheromone removed	confined	removed	C11	green1141781	green	L	1	LR	1st	1	1		0
41781	Afternoon	confined - pheromone removed	confined	removed	C11	green1141781	green	L	2	LR	1st	1	1		4
41781	Afternoon	confined - pheromone removed	confined	removed	C11	green1141781	green	L	3	LR	1st	1	1		5
41781	Afternoon	confined - pheromone removed	confined	removed	C11	green1141781	green	L	4	LR	1st	1	1	5	4
41781	Afternoon	confined - pheromone removed	confined	removed	C11	green1141781	green	L	5	LR	1st	1	1		3
41781	Afternoon	confined - pheromone removed	confined	removed	C11	green1141781	green	L	6	LR	1st	1	1
41781	Afternoon	confined - pheromone removed	confined	removed	C11	green1141781	green	L	7	RR	1st	0	0	1
41781	Afternoon	confined - pheromone removed	confined	removed	C11	red1141781	red	L	1	LR	1st	1	1
41781	Afternoon	confined - pheromone removed	confined	removed	C11	red1141781	red	L	2	LR	1st	1	1		3
41781	Afternoon	confined - pheromone removed	confined	removed	C11	red1141781	red	L	3	LR	1st	1	1
41781	Afternoon	confined - pheromone removed	confined	removed	C11	red1141781	red	L	4	LR	1st	1	1		5
41781	Afternoon	confined - pheromone removed	confined	removed	C11	red1141781	red	L	5	LR	1st	1	1		4
41781	Afternoon	confined - pheromone removed	confined	removed	C11	red1141781	red	L	6	LR	1st	1	1	3
41781	Afternoon	confined - pheromone removed	confined	removed	C11	red1141781	red	L	7	LR	1st	1	1
41781	Afternoon	confined - pheromone removed	confined	removed	C11	yellow1141781	yellow	L	1	LR	1st	1	1		3
41781	Afternoon	confined - pheromone removed	confined	removed	C11	yellow1141781	yellow	L	2	LR	1st	1	1
41781	Afternoon	confined - pheromone removed	confined	removed	C11	yellow1141781	yellow	L	3	LR	1st	1	1
41781	Afternoon	confined - pheromone removed	confined	removed	C11	yellow1141781	yellow	L	4	LR	1st	1	1	2	6
41781	Afternoon	confined - pheromone removed	confined	removed	C11	yellow1141781	yellow	L	5	LR	1st	1	1	4	3
41781	Afternoon	confined - pheromone removed	confined	removed	C11	yellow1141781	yellow	L	6	LR	1st	1	1	5	2
41781	Afternoon	confined - pheromone removed	confined	removed	C11	yellow1141781	yellow	L	7	RR	1st	0	0	3
41786	Morning	confined - pheromone allowed	confined	allowed	C5	silver541786	silver	R	1	RL	1st	1	1	0	0
27.05.2014	Morning	confined - pheromone allowed	confined	allowed	C5	silver527.05.2014	silver	R	2		1st
27.05.2014	Morning	confined - pheromone allowed	confined	allowed	C5	silver527.05.2014	silver	R	3		1st
27.05.2014	Morning	confined - pheromone allowed	confined	allowed	C5	silver527.05.2014	silver	R	4		1st
27.05.2014	Morning	confined - pheromone allowed	confined	allowed	C5	silver527.05.2014	silver	R	5		1st
27.05.2014	Morning	confined - pheromone allowed	confined	allowed	C5	silver527.05.2014	silver	R	6		1st
27.05.2014	Morning	confined - pheromone allowed	confined	allowed	C5	silver527.05.2014	silver	R	7		1st
27.05.2014	Morning	confined - pheromone allowed	confined	allowed	C5	yellow527.05.2014	yellow	R	1	RL	1st	1	1		4
27.05.2014	Morning	confined - pheromone allowed	confined	allowed	C5	yellow527.05.2014	yellow	R	2	RL	1st	1	1	4	1
27.05.2014	Morning	confined - pheromone allowed	confined	allowed	C5	yellow527.05.2014	yellow	R	3	RL	1st	1	1	0	3
27.05.2014	Morning	confined - pheromone allowed	confined	allowed	C5	yellow527.05.2014	yellow	R	4	RL	1st	1	1		3
27.05.2014	Morning	confined - pheromone allowed	confined	allowed	C5	yellow527.05.2014	yellow	R	5	RL	1st	1	1	3
27.05.2014	Morning	confined - pheromone allowed	confined	allowed	C5	yellow527.05.2014	yellow	R	6	RL	1st	1	1		2
27.05.2014	Morning	confined - pheromone allowed	confined	allowed	C5	yellow527.05.2014	yellow	R	7	LR	1st	0	0	0
27.05.2014	Morning	confined - pheromone allowed	confined	allowed	C5	green527.05.2014	green	R	1	RL	1st	1	1	0
27.05.2014	Morning	confined - pheromone allowed	confined	allowed	C5	green527.05.2014	green	R	2	RL	1st	1	1	0	4
27.05.2014	Morning	confined - pheromone allowed	confined	allowed	C5	green527.05.2014	green	R	3	RL	1st	1	1		3
27.05.2014	Morning	confined - pheromone allowed	confined	allowed	C5	green527.05.2014	green	R	4	RL	1st	1	1	0	0
27.05.2014	Morning	confined - pheromone allowed	confined	allowed	C5	green527.05.2014	green	R	5	RL	1st	1	1	2	0
27.05.2014	Morning	confined - pheromone allowed	confined	allowed	C5	green527.05.2014	green	R	6	RL	1st	1	1	0
27.05.2014	Morning	confined - pheromone allowed	confined	allowed	C5	green527.05.2014	green	R	7	LL	1st	0	0	0
27.05.2014	Morning	confined - pheromone allowed	confined	allowed	C5	red527.05.2014	red	R	1	RL	1st	1	1	3	7
27.05.2014	Morning	confined - pheromone allowed	confined	allowed	C5	red527.05.2014	red	R	2	RL	1st	1	1	0	4
27.05.2014	Morning	confined - pheromone allowed	confined	allowed	C5	red527.05.2014	red	R	3	RL	1st	1	1	3	2
27.05.2014	Morning	confined - pheromone allowed	confined	allowed	C5	red527.05.2014	red	R	4	RL	1st	1	1		0
27.05.2014	Morning	confined - pheromone allowed	confined	allowed	C5	red527.05.2014	red	R	5	RL	1st	1	1
27.05.2014	Morning	confined - pheromone allowed	confined	allowed	C5	red527.05.2014	red	R	6	RL	1st	1	1	2	0
27.05.2014	Morning	confined - pheromone allowed	confined	allowed	C5	red527.05.2014	red	R	7	RL	1st	1	1	0
27.05.2014	Morning	confined - pheromone allowed	confined	allowed	C5	orange527.05.2014	orange	R	1	RL	1st	1	1
27.05.2014	Morning	confined - pheromone allowed	confined	allowed	C5	orange527.05.2014	orange	R	2	RL	1st	1	1	2
27.05.2014	Morning	confined - pheromone allowed	confined	allowed	C5	orange527.05.2014	orange	R	3	RL	1st	1	1	2
27.05.2014	Morning	confined - pheromone allowed	confined	allowed	C5	orange527.05.2014	orange	R	4	RL	1st	1	1	3	0
27.05.2014	Morning	confined - pheromone allowed	confined	allowed	C5	orange527.05.2014	orange	R	5	RL	1st	1	1		0
27.05.2014	Morning	confined - pheromone allowed	confined	allowed	C5	orange527.05.2014	orange	R	6	RL	1st	1	1	0	0
27.05.2014	Morning	confined - pheromone allowed	confined	allowed	C5	orange527.05.2014	orange	R	7	LR	1st	0	0	3
41786	Morning	confined - pheromone allowed	confined	allowed	C888	blue88841786	blue	R	1	RL	1st	1	1	0	3
27.05.2014	Morning	confined - pheromone allowed	confined	allowed	C888	blue88827.05.2014	blue	R	2	RL	1st	1	1	0	1
27.05.2014	Morning	confined - pheromone allowed	confined	allowed	C888	blue88827.05.2014	blue	R	3	RL	1st	1	1		2
27.05.2014	Morning	confined - pheromone allowed	confined	allowed	C888	blue88827.05.2014	blue	R	4	RL	1st	1	1	0	0
27.05.2014	Morning	confined - pheromone allowed	confined	allowed	C888	blue88827.05.2014	blue	R	5	RL	1st	1	1		2
27.05.2014	Morning	confined - pheromone allowed	confined	allowed	C888	blue88827.05.2014	blue	R	6	RL	1st	1	1	1	0
27.05.2014	Morning	confined - pheromone allowed	confined	allowed	C888	blue88827.05.2014	blue	R	7	LL	1st	0	0	0
27.05.2014	Morning	confined - pheromone allowed	confined	allowed	C888	yellow88827.05.2014	yellow	R	1	RL	1st	1	1	0	2
27.05.2014	Morning	confined - pheromone allowed	confined	allowed	C888	yellow88827.05.2014	yellow	R	2	RL	1st	1	1	0	2
27.05.2014	Morning	confined - pheromone allowed	confined	allowed	C888	yellow88827.05.2014	yellow	R	3	RL	1st	1	1	0	1
27.05.2014	Morning	confined - pheromone allowed	confined	allowed	C888	yellow88827.05.2014	yellow	R	4	RL	1st	1	1	1	1
27.05.2014	Morning	confined - pheromone allowed	confined	allowed	C888	yellow88827.05.2014	yellow	R	5	RL	1st	1	1	0	0
27.05.2014	Morning	confined - pheromone allowed	confined	allowed	C888	yellow88827.05.2014	yellow	R	6	RL	1st	1	1	0	0
27.05.2014	Morning	confined - pheromone allowed	confined	allowed	C888	yellow88827.05.2014	yellow	R	7	LL	1st	0	0	0
27.05.2014	Morning	confined - pheromone allowed	confined	allowed	C888	green88827.05.2014	green	R	1	RL	1st	1	1	1	4
27.05.2014	Morning	confined - pheromone allowed	confined	allowed	C888	green88827.05.2014	green	R	2	RL	1st	1	1	1
27.05.2014	Morning	confined - pheromone allowed	confined	allowed	C888	green88827.05.2014	green	R	3	RL	1st	1	1	0
27.05.2014	Morning	confined - pheromone allowed	confined	allowed	C888	green88827.05.2014	green	R	4	RL	1st	1	1	3
27.05.2014	Morning	confined - pheromone allowed	confined	allowed	C888	green88827.05.2014	green	R	5	RL	1st	1	1	2	0
27.05.2014	Morning	confined - pheromone allowed	confined	allowed	C888	green88827.05.2014	green	R	6	RL	1st	1	1	0	0
27.05.2014	Morning	confined - pheromone allowed	confined	allowed	C888	green88827.05.2014	green	R	7	LL	1st	0	0	1
27.05.2014	Morning	confined - pheromone allowed	confined	allowed	C888	red88827.05.2014	red	R	1	RL	1st	1	1	0	1
27.05.2014	Morning	confined - pheromone allowed	confined	allowed	C888	red88827.05.2014	red	R	2	RL	1st	1	1	0
27.05.2014	Morning	confined - pheromone allowed	confined	allowed	C888	red88827.05.2014	red	R	3	RL	1st	1	1	2	4
27.05.2014	Morning	confined - pheromone allowed	confined	allowed	C888	red88827.05.2014	red	R	4	RL	1st	1	1		6
27.05.2014	Morning	confined - pheromone allowed	confined	allowed	C888	red88827.05.2014	red	R	5	RL	1st	1	1	3	2
27.05.2014	Morning	confined - pheromone allowed	confined	allowed	C888	red88827.05.2014	red	R	6	RL	1st	1	1	3
27.05.2014	Morning	confined - pheromone allowed	confined	allowed	C888	red88827.05.2014	red	R	7	LL	1st	0	0	0
27.05.2014	Morning	confined - pheromone allowed	confined	allowed	C888	orange88827.05.2014	orange	R	1	RL	1st	1	1	0	1
27.05.2014	Morning	confined - pheromone allowed	confined	allowed	C888	orange88827.05.2014	orange	R	2	RL	1st	1	1	3
27.05.2014	Morning	confined - pheromone allowed	confined	allowed	C888	orange88827.05.2014	orange	R	3	RL	1st	1	1	0	1
27.05.2014	Morning	confined - pheromone allowed	confined	allowed	C888	orange88827.05.2014	orange	R	4	RL	1st	1	1	0	0
27.05.2014	Morning	confined - pheromone allowed	confined	allowed	C888	orange88827.05.2014	orange	R	5	RL	1st	1	1		0
27.05.2014	Morning	confined - pheromone allowed	confined	allowed	C888	orange88827.05.2014	orange	R	6	RL	1st	1	1
27.05.2014	Morning	confined - pheromone allowed	confined	allowed	C888	orange88827.05.2014	orange	R	7	LL	1st	0	0	3
41786	Afternoon	confined - pheromone allowed	confined	allowed	C888	blue88841786	blue	L	1	LR	1st	1	1
27.05.2014	Afternoon	confined - pheromone allowed	confined	allowed	C888	blue88827.05.2014	blue	L	2	LR	1st	1	1	1	2
27.05.2014	Afternoon	confined - pheromone allowed	confined	allowed	C888	blue88827.05.2014	blue	L	3	LR	1st	1	1	1	2
27.05.2014	Afternoon	confined - pheromone allowed	confined	allowed	C888	blue88827.05.2014	blue	L	4	LR	1st	1	1	1	4
27.05.2014	Afternoon	confined - pheromone allowed	confined	allowed	C888	blue88827.05.2014	blue	L	5	LR	1st	1	1	0	1
27.05.2014	Afternoon	confined - pheromone allowed	confined	allowed	C888	blue88827.05.2014	blue	L	6	LR	1st	1	1		1
27.05.2014	Afternoon	confined - pheromone allowed	confined	allowed	C888	blue88827.05.2014	blue	L	7	L*R	1st			0		1
27.05.2014	Afternoon	confined - pheromone allowed	confined	allowed	C888	yellow88827.05.2014	yellow	L	1	LR	1st	1	1	0	2
27.05.2014	Afternoon	confined - pheromone allowed	confined	allowed	C888	yellow88827.05.2014	yellow	L	2	LR	1st	1	1	0	0
27.05.2014	Afternoon	confined - pheromone allowed	confined	allowed	C888	yellow88827.05.2014	yellow	L	3	LR	1st	1	1	2	1
27.05.2014	Afternoon	confined - pheromone allowed	confined	allowed	C888	yellow88827.05.2014	yellow	L	4	LR	1st	1	1	2	3
27.05.2014	Afternoon	confined - pheromone allowed	confined	allowed	C888	yellow88827.05.2014	yellow	L	5	LR	1st	1	1	3	0
27.05.2014	Afternoon	confined - pheromone allowed	confined	allowed	C888	yellow88827.05.2014	yellow	L	6	LR	1st	1	1	1	0
27.05.2014	Afternoon	confined - pheromone allowed	confined	allowed	C888	yellow88827.05.2014	yellow	L	7	L*R	1st			0		1
27.05.2014	Afternoon	confined - pheromone allowed	confined	allowed	C888	green88827.05.2014	green	L	1	LR	1st	1	1	2
27.05.2014	Afternoon	confined - pheromone allowed	confined	allowed	C888	green88827.05.2014	green	L	2	LR	1st	1	1		2
27.05.2014	Afternoon	confined - pheromone allowed	confined	allowed	C888	green88827.05.2014	green	L	3	LR	1st	1	1	0	1
27.05.2014	Afternoon	confined - pheromone allowed	confined	allowed	C888	green88827.05.2014	green	L	4	LR	1st	1	1	1
27.05.2014	Afternoon	confined - pheromone allowed	confined	allowed	C888	green88827.05.2014	green	L	5	LR	1st	1	1		1
27.05.2014	Afternoon	confined - pheromone allowed	confined	allowed	C888	green88827.05.2014	green	L	6	LR	1st	1	1	0	1
27.05.2014	Afternoon	confined - pheromone allowed	confined	allowed	C888	green88827.05.2014	green	L	7	L*R	1st					1
27.05.2014	Afternoon	confined - pheromone allowed	confined	allowed	C888	red88827.05.2014	red	L	1	LR	1st	1	1
27.05.2014	Afternoon	confined - pheromone allowed	confined	allowed	C888	red88827.05.2014	red	L	2	LR	1st	1	1	0	0
27.05.2014	Afternoon	confined - pheromone allowed	confined	allowed	C888	red88827.05.2014	red	L	3	LR	1st	1	1	2	3
27.05.2014	Afternoon	confined - pheromone allowed	confined	allowed	C888	red88827.05.2014	red	L	4	LR	1st	1	1	0	1
27.05.2014	Afternoon	confined - pheromone allowed	confined	allowed	C888	red88827.05.2014	red	L	5	LR	1st	1	1	0	2
27.05.2014	Afternoon	confined - pheromone allowed	confined	allowed	C888	red88827.05.2014	red	L	6	LR	1st	1	1	0	0
27.05.2014	Afternoon	confined - pheromone allowed	confined	allowed	C888	red88827.05.2014	red	L	7	LR	1st				0
27.05.2014	Afternoon	confined - pheromone allowed	confined	allowed	C888	orange88827.05.2014	orange	L	1	LR	1st	1	1	0
27.05.2014	Afternoon	confined - pheromone allowed	confined	allowed	C888	orange88827.05.2014	orange	L	2	LR	1st	1	1	0	0
27.05.2014	Afternoon	confined - pheromone allowed	confined	allowed	C888	orange88827.05.2014	orange	L	3	LR	1st	1	1
27.05.2014	Afternoon	confined - pheromone allowed	confined	allowed	C888	orange88827.05.2014	orange	L	4		1st
27.05.2014	Afternoon	confined - pheromone allowed	confined	allowed	C888	orange88827.05.2014	orange	L	5		1st
27.05.2014	Afternoon	confined - pheromone allowed	confined	allowed	C888	orange88827.05.2014	orange	L	6		1st
27.05.2014	Afternoon	confined - pheromone allowed	confined	allowed	C888	orange88827.05.2014	orange	L	7		1st
28.05.2014	Morning	confined - pheromone removed	confined	removed	C3	blue328.05.2014	blue	R	1	RL	1st	1	1	2
28.05.2014	Morning	confined - pheromone removed	confined	removed	C3	blue328.05.2014	blue	R	2	RL	1st	1	1
28.05.2014	Morning	confined - pheromone removed	confined	removed	C3	blue328.05.2014	blue	R	3	RL	1st	1	1	2
28.05.2014	Morning	confined - pheromone removed	confined	removed	C3	blue328.05.2014	blue	R	4	RL	1st	1	1		5
28.05.2014	Morning	confined - pheromone removed	confined	removed	C3	blue328.05.2014	blue	R	5	RL	1st	1	1	0	2
28.05.2014	Morning	confined - pheromone removed	confined	removed	C3	blue328.05.2014	blue	R	6	RL	1st	1	1		5
28.05.2014	Morning	confined - pheromone removed	confined	removed	C3	blue328.05.2014	blue	R	7	LL	1st	0	0	0
28.05.2014	Morning	confined - pheromone removed	confined	removed	C3	yellow328.05.2014	yellow	R	1	RL	1st	1	1	0
28.05.2014	Morning	confined - pheromone removed	confined	removed	C3	yellow328.05.2014	yellow	R	2	RL	1st	1	1	0
28.05.2014	Morning	confined - pheromone removed	confined	removed	C3	yellow328.05.2014	yellow	R	3	RL	1st	1	1	0	2
28.05.2014	Morning	confined - pheromone removed	confined	removed	C3	yellow328.05.2014	yellow	R	4	RL	1st	1	1	0
28.05.2014	Morning	confined - pheromone removed	confined	removed	C3	yellow328.05.2014	yellow	R	5	RL	1st	1	1	0	2
28.05.2014	Morning	confined - pheromone removed	confined	removed	C3	yellow328.05.2014	yellow	R	6	RL	1st	1	1		0
28.05.2014	Morning	confined - pheromone removed	confined	removed	C3	yellow328.05.2014	yellow	R	7	LL	1st	0	0	1
28.05.2014	Morning	confined - pheromone removed	confined	removed	C3	green328.05.2014	green	R	1	RL	1st	1	1	2
28.05.2014	Morning	confined - pheromone removed	confined	removed	C3	green328.05.2014	green	R	2	RL	1st	1	1		4
28.05.2014	Morning	confined - pheromone removed	confined	removed	C3	green328.05.2014	green	R	3	RL	1st	1	1	0
28.05.2014	Morning	confined - pheromone removed	confined	removed	C3	green328.05.2014	green	R	4	RL	1st	1	1	0	4
28.05.2014	Morning	confined - pheromone removed	confined	removed	C3	green328.05.2014	green	R	5	RL	1st	1	1	0	6
28.05.2014	Morning	confined - pheromone removed	confined	removed	C3	green328.05.2014	green	R	6	RL	1st	1	1	0
28.05.2014	Morning	confined - pheromone removed	confined	removed	C3	green328.05.2014	green	R	7	LR	1st	0	0
28.05.2014	Morning	confined - pheromone removed	confined	removed	C3	red328.05.2014	red	R	1	RL	1st	1	1	0
28.05.2014	Morning	confined - pheromone removed	confined	removed	C3	red328.05.2014	red	R	2	RL	1st	1	1
28.05.2014	Morning	confined - pheromone removed	confined	removed	C3	red328.05.2014	red	R	3	RL	1st	1	1	4	2
28.05.2014	Morning	confined - pheromone removed	confined	removed	C3	red328.05.2014	red	R	4	RL	1st	1	1	3	2
28.05.2014	Morning	confined - pheromone removed	confined	removed	C3	red328.05.2014	red	R	5	RL	1st	1	1		3
28.05.2014	Morning	confined - pheromone removed	confined	removed	C3	red328.05.2014	red	R	6	RL	1st	1	1
28.05.2014	Morning	confined - pheromone removed	confined	removed	C3	red328.05.2014	red	R	7	L*R	1st	0	0			1
28.05.2014	Morning	confined - pheromone removed	confined	removed	C3	orange328.05.2014	orange	R	1	RL	1st	1	1	1	4
28.05.2014	Morning	confined - pheromone removed	confined	removed	C3	orange328.05.2014	orange	R	2	RL	1st	1	1	0	5
28.05.2014	Morning	confined - pheromone removed	confined	removed	C3	orange328.05.2014	orange	R	3	RL	1st	1	1		6
28.05.2014	Morning	confined - pheromone removed	confined	removed	C3	orange328.05.2014	orange	R	4	RL	1st	1	1
28.05.2014	Morning	confined - pheromone removed	confined	removed	C3	orange328.05.2014	orange	R	5	RL	1st	1	1	0
28.05.2014	Morning	confined - pheromone removed	confined	removed	C3	orange328.05.2014	orange	R	6	RL	1st	1	1		6
28.05.2014	Morning	confined - pheromone removed	confined	removed	C3	orange328.05.2014	orange	R	7	LL	1st	0	0
41787	Afternoon	confined - pheromone removed	confined	removed	C6	blue641787	blue	R	1	RL	1st	1	1	0	1
28.05.2014	Afternoon	confined - pheromone removed	confined	removed	C6	blue628.05.2014	blue	R	2	RL	1st	1	1	0
28.05.2014	Afternoon	confined - pheromone removed	confined	removed	C6	blue628.05.2014	blue	R	3	RL	1st	1	1	0
28.05.2014	Afternoon	confined - pheromone removed	confined	removed	C6	blue628.05.2014	blue	R	4	RL	1st	1	1		2
28.05.2014	Afternoon	confined - pheromone removed	confined	removed	C6	blue628.05.2014	blue	R	5	RL	1st	1	1	2	2
28.05.2014	Afternoon	confined - pheromone removed	confined	removed	C6	blue628.05.2014	blue	R	6	RL	1st	1	1	0	2
28.05.2014	Afternoon	confined - pheromone removed	confined	removed	C6	blue628.05.2014	blue	R	7	LL	1st	0	0	0
28.05.2014	Afternoon	confined - pheromone removed	confined	removed	C6	yellow628.05.2014	yellow	R	1	RL	1st	1	1	4	4
28.05.2014	Afternoon	confined - pheromone removed	confined	removed	C6	yellow628.05.2014	yellow	R	2	RL	1st	1	1	5	5
28.05.2014	Afternoon	confined - pheromone removed	confined	removed	C6	yellow628.05.2014	yellow	R	3	RL	1st	1	1	4	4
28.05.2014	Afternoon	confined - pheromone removed	confined	removed	C6	yellow628.05.2014	yellow	R	4	RL	1st	1	1	3	3
28.05.2014	Afternoon	confined - pheromone removed	confined	removed	C6	yellow628.05.2014	yellow	R	5	RL	1st	1	1	3	3
28.05.2014	Afternoon	confined - pheromone removed	confined	removed	C6	yellow628.05.2014	yellow	R	6	RL	1st	1	1	1	1
28.05.2014	Afternoon	confined - pheromone removed	confined	removed	C6	yellow628.05.2014	yellow	R	7	RL	1st	1	1
28.05.2014	Afternoon	confined - pheromone removed	confined	removed	C6	green628.05.2014	green	R	1	RL	1st	1	1		4
28.05.2014	Afternoon	confined - pheromone removed	confined	removed	C6	green628.05.2014	green	R	2	RL	1st	1	1		1
28.05.2014	Afternoon	confined - pheromone removed	confined	removed	C6	green628.05.2014	green	R	3	RL	1st	1	1	1	3
28.05.2014	Afternoon	confined - pheromone removed	confined	removed	C6	green628.05.2014	green	R	4	RL	1st	1	1	3	4
28.05.2014	Afternoon	confined - pheromone removed	confined	removed	C6	green628.05.2014	green	R	5	RL	1st	1	1	4	4
28.05.2014	Afternoon	confined - pheromone removed	confined	removed	C6	green628.05.2014	green	R	6	RL	1st	1	1		1
28.05.2014	Afternoon	confined - pheromone removed	confined	removed	C6	green628.05.2014	green	R	7	RL	1st	1	1	3
28.05.2014	Afternoon	confined - pheromone removed	confined	removed	C6	red628.05.2014	red	R	1	RL	1st	1	1		2
28.05.2014	Afternoon	confined - pheromone removed	confined	removed	C6	red628.05.2014	red	R	2	RL	1st	1	1	0
28.05.2014	Afternoon	confined - pheromone removed	confined	removed	C6	red628.05.2014	red	R	3	RL	1st	1	1	0	4
28.05.2014	Afternoon	confined - pheromone removed	confined	removed	C6	red628.05.2014	red	R	4	RL	1st	1	1	4
28.05.2014	Afternoon	confined - pheromone removed	confined	removed	C6	red628.05.2014	red	R	5	RL	1st	1	1	1	1
28.05.2014	Afternoon	confined - pheromone removed	confined	removed	C6	red628.05.2014	red	R	6	RL	1st	1	1		1
28.05.2014	Afternoon	confined - pheromone removed	confined	removed	C6	red628.05.2014	red	R	7	LL	1st	0	0	0
28.05.2014	Afternoon	confined - pheromone removed	confined	removed	C6	orange628.05.2014	orange	R	1	RL	1st	1	1		4
28.05.2014	Afternoon	confined - pheromone removed	confined	removed	C6	orange628.05.2014	orange	R	2	RL	1st	1	1
28.05.2014	Afternoon	confined - pheromone removed	confined	removed	C6	orange628.05.2014	orange	R	3	RL	1st	1	1	0	0
28.05.2014	Afternoon	confined - pheromone removed	confined	removed	C6	orange628.05.2014	orange	R	4	RL	1st	1	1		2
28.05.2014	Afternoon	confined - pheromone removed	confined	removed	C6	orange628.05.2014	orange	R	5	RL	1st	1	1	0	0
28.05.2014	Afternoon	confined - pheromone removed	confined	removed	C6	orange628.05.2014	orange	R	6	RL	1st	1	1		0
28.05.2014	Afternoon	confined - pheromone removed	confined	removed	C6	orange628.05.2014	orange	R	7	LL	1st	0	0	0
41787	Afternoon	confined - pheromone removed	confined	removed	C888split	blue888split41787	blue	R	1	RL	1st	1	1	0
28.05.2014	Afternoon	confined - pheromone removed	confined	removed	C888split	blue888split28.05.2014	blue	R	2	RL	1st	1	1		0
28.05.2014	Afternoon	confined - pheromone removed	confined	removed	C888split	blue888split28.05.2014	blue	R	3	RL	1st	1	1	2	2
28.05.2014	Afternoon	confined - pheromone removed	confined	removed	C888split	blue888split28.05.2014	blue	R	4	RL	1st	1	1	0
28.05.2014	Afternoon	confined - pheromone removed	confined	removed	C888split	blue888split28.05.2014	blue	R	5	RL	1st	1	1	0	2
28.05.2014	Afternoon	confined - pheromone removed	confined	removed	C888split	blue888split28.05.2014	blue	R	6	RL	1st	1	1	1
28.05.2014	Afternoon	confined - pheromone removed	confined	removed	C888split	blue888split28.05.2014	blue	R	7	LL	1st	0	0
28.05.2014	Afternoon	confined - pheromone removed	confined	removed	C888split	yellow888split28.05.2014	yellow	R	1	RL	1st	1	1		2
28.05.2014	Afternoon	confined - pheromone removed	confined	removed	C888split	yellow888split28.05.2014	yellow	R	2	RL	1st	1	1	4	0
28.05.2014	Afternoon	confined - pheromone removed	confined	removed	C888split	yellow888split28.05.2014	yellow	R	3	RL	1st	1	1	3
28.05.2014	Afternoon	confined - pheromone removed	confined	removed	C888split	yellow888split28.05.2014	yellow	R	4	RL	1st	1	1	4	2
28.05.2014	Afternoon	confined - pheromone removed	confined	removed	C888split	yellow888split28.05.2014	yellow	R	5	RL	1st	1	1		6
28.05.2014	Afternoon	confined - pheromone removed	confined	removed	C888split	yellow888split28.05.2014	yellow	R	6	RL	1st	1	1		6
28.05.2014	Afternoon	confined - pheromone removed	confined	removed	C888split	yellow888split28.05.2014	yellow	R	7	LL	1st	0	0	4
28.05.2014	Afternoon	confined - pheromone removed	confined	removed	C888split	green888split28.05.2014	green	R	1	RL	1st	1	1
28.05.2014	Afternoon	confined - pheromone removed	confined	removed	C888split	green888split28.05.2014	green	R	2		1st
28.05.2014	Afternoon	confined - pheromone removed	confined	removed	C888split	green888split28.05.2014	green	R	3		1st
28.05.2014	Afternoon	confined - pheromone removed	confined	removed	C888split	green888split28.05.2014	green	R	4		1st
28.05.2014	Afternoon	confined - pheromone removed	confined	removed	C888split	green888split28.05.2014	green	R	5		1st
28.05.2014	Afternoon	confined - pheromone removed	confined	removed	C888split	green888split28.05.2014	green	R	6		1st
28.05.2014	Afternoon	confined - pheromone removed	confined	removed	C888split	green888split28.05.2014	green	R	7		1st
28.05.2014	Afternoon	confined - pheromone removed	confined	removed	C888split	red888split28.05.2014	red	R	1	RL	1st	1	1
28.05.2014	Afternoon	confined - pheromone removed	confined	removed	C888split	red888split28.05.2014	red	R	2	RL	1st	1	1
28.05.2014	Afternoon	confined - pheromone removed	confined	removed	C888split	red888split28.05.2014	red	R	3	RL	1st	1	1	0	0
28.05.2014	Afternoon	confined - pheromone removed	confined	removed	C888split	red888split28.05.2014	red	R	4	RL	1st	1	1	0	1
28.05.2014	Afternoon	confined - pheromone removed	confined	removed	C888split	red888split28.05.2014	red	R	5	RL	1st	1	1	0
28.05.2014	Afternoon	confined - pheromone removed	confined	removed	C888split	red888split28.05.2014	red	R	6	RL	1st	1	1	0
28.05.2014	Afternoon	confined - pheromone removed	confined	removed	C888split	red888split28.05.2014	red	R	7	RL	1st	1	1	0
28.05.2014	Afternoon	confined - pheromone removed	confined	removed	C888split	orange888split28.05.2014	orange	R	1	RL	1st	1	1	0
28.05.2014	Afternoon	confined - pheromone removed	confined	removed	C888split	orange888split28.05.2014	orange	R	2	RL	1st	1	1	0
28.05.2014	Afternoon	confined - pheromone removed	confined	removed	C888split	orange888split28.05.2014	orange	R	3	RL	1st	1	1	1	3
28.05.2014	Afternoon	confined - pheromone removed	confined	removed	C888split	orange888split28.05.2014	orange	R	4	RL	1st	1	1		0
28.05.2014	Afternoon	confined - pheromone removed	confined	removed	C888split	orange888split28.05.2014	orange	R	5	RL	1st	1	1
28.05.2014	Afternoon	confined - pheromone removed	confined	removed	C888split	orange888split28.05.2014	orange	R	6	RL	1st	1	1	0
28.05.2014	Afternoon	confined - pheromone removed	confined	removed	C888split	orange888split28.05.2014	orange	R	7	R*L	1st	1	1	0		1
41787	Morning	confined - pheromone removed	confined	removed	C888split	blue888split41787	blue	L	1	LR	1st	1	1		3
28.05.2014	Morning	confined - pheromone removed	confined	removed	C888split	blue888split28.05.2014	blue	L	2	LR	1st	1	1		1
28.05.2014	Morning	confined - pheromone removed	confined	removed	C888split	blue888split28.05.2014	blue	L	3	LR	1st	1	1	1	3
28.05.2014	Morning	confined - pheromone removed	confined	removed	C888split	blue888split28.05.2014	blue	L	4	LR	1st	1	1	0	0
28.05.2014	Morning	confined - pheromone removed	confined	removed	C888split	blue888split28.05.2014	blue	L	5	LR	1st	1	1	2	0
28.05.2014	Morning	confined - pheromone removed	confined	removed	C888split	blue888split28.05.2014	blue	L	6	LR	1st	1	1	0	0
28.05.2014	Morning	confined - pheromone removed	confined	removed	C888split	blue888split28.05.2014	blue	L	7	RR	1st	0	0
28.05.2014	Morning	confined - pheromone removed	confined	removed	C888split	yellow888split28.05.2014	yellow	L	1	LR	1st	1	1	2	6
28.05.2014	Morning	confined - pheromone removed	confined	removed	C888split	yellow888split28.05.2014	yellow	L	2	LR	1st	1	1	0	6
28.05.2014	Morning	confined - pheromone removed	confined	removed	C888split	yellow888split28.05.2014	yellow	L	3	LR	1st	1	1		4
28.05.2014	Morning	confined - pheromone removed	confined	removed	C888split	yellow888split28.05.2014	yellow	L	4	LR	1st	1	1
28.05.2014	Morning	confined - pheromone removed	confined	removed	C888split	yellow888split28.05.2014	yellow	L	5	LR	1st	1	1	1	1
28.05.2014	Morning	confined - pheromone removed	confined	removed	C888split	yellow888split28.05.2014	yellow	L	6	LR	1st	1	1	0
28.05.2014	Morning	confined - pheromone removed	confined	removed	C888split	yellow888split28.05.2014	yellow	L	7	RL	1st	0	0	1
28.05.2014	Morning	confined - pheromone removed	confined	removed	C888split	green888split28.05.2014	green	L	1	LR	1st	1	1	4	0
28.05.2014	Morning	confined - pheromone removed	confined	removed	C888split	green888split28.05.2014	green	L	2	LR	1st	1	1	0
28.05.2014	Morning	confined - pheromone removed	confined	removed	C888split	green888split28.05.2014	green	L	3	LR	1st	1	1		0
28.05.2014	Morning	confined - pheromone removed	confined	removed	C888split	green888split28.05.2014	green	L	4	LR	1st	1	1	0	0
28.05.2014	Morning	confined - pheromone removed	confined	removed	C888split	green888split28.05.2014	green	L	5	LR	1st	1	1	0	0
28.05.2014	Morning	confined - pheromone removed	confined	removed	C888split	green888split28.05.2014	green	L	6	LR	1st	1	1		0
28.05.2014	Morning	confined - pheromone removed	confined	removed	C888split	green888split28.05.2014	green	L	7	RR	1st	0	0	0
28.05.2014	Morning	confined - pheromone removed	confined	removed	C888split	red888split28.05.2014	red	L	1	LR	1st	1	1
28.05.2014	Morning	confined - pheromone removed	confined	removed	C888split	red888split28.05.2014	red	L	2	LR	1st	1	1	0
28.05.2014	Morning	confined - pheromone removed	confined	removed	C888split	red888split28.05.2014	red	L	3	LR	1st	1	1	1
28.05.2014	Morning	confined - pheromone removed	confined	removed	C888split	red888split28.05.2014	red	L	4	LR	1st	1	1		2
28.05.2014	Morning	confined - pheromone removed	confined	removed	C888split	red888split28.05.2014	red	L	5	LR	1st	1	1		1
28.05.2014	Morning	confined - pheromone removed	confined	removed	C888split	red888split28.05.2014	red	L	6	LR	1st	1	1	4
28.05.2014	Morning	confined - pheromone removed	confined	removed	C888split	red888split28.05.2014	red	L	7	RL	1st	0	0
28.05.2014	Morning	confined - pheromone removed	confined	removed	C888split	orange888split28.05.2014	orange	L	1	LR	1st	1	1
28.05.2014	Morning	confined - pheromone removed	confined	removed	C888split	orange888split28.05.2014	orange	L	2	LR	1st	1	1
28.05.2014	Morning	confined - pheromone removed	confined	removed	C888split	orange888split28.05.2014	orange	L	3	LR	1st	1	1
28.05.2014	Morning	confined - pheromone removed	confined	removed	C888split	orange888split28.05.2014	orange	L	4	LR	1st	1	1
28.05.2014	Morning	confined - pheromone removed	confined	removed	C888split	orange888split28.05.2014	orange	L	5	LR	1st	1	1
28.05.2014	Morning	confined - pheromone removed	confined	removed	C888split	orange888split28.05.2014	orange	L	6	LR	1st	1	1
28.05.2014	Morning	confined - pheromone removed	confined	removed	C888split	orange888split28.05.2014	orange	L	7	RR	1st	0	0
41800	Afternoon	confined - pheromone allowed	confined	allowed	C5	blue541800	blue	L	0		1st				0
41800	Afternoon	confined - pheromone allowed	confined	allowed	C5	blue541800	blue	L	1	LR	1st	1	1	0	1
41800	Afternoon	confined - pheromone allowed	confined	allowed	C5	blue541800	blue	L	2	LR	1st	1	1	1	2
41800	Afternoon	confined - pheromone allowed	confined	allowed	C5	blue541800	blue	L	3	LR	1st	1	1	0	2
41800	Afternoon	confined - pheromone allowed	confined	allowed	C5	blue541800	blue	L	4	LR	1st	1	1	2	2
41800	Afternoon	confined - pheromone allowed	confined	allowed	C5	blue541800	blue	L	5	LR	1st	1	1	2	2
41800	Afternoon	confined - pheromone allowed	confined	allowed	C5	blue541800	blue	L	6	LR	1st	1	1	4	2
41800	Afternoon	confined - pheromone allowed	confined	allowed	C5	blue541800	blue	L	7	RL	1st	0	0	0
41800	Afternoon	confined - pheromone allowed	confined	allowed	C5	yellow541800	yellow	L	0		1st				2
41800	Afternoon	confined - pheromone allowed	confined	allowed	C5	yellow541800	yellow	L	1	LR	1st	1	1	2	1
41800	Afternoon	confined - pheromone allowed	confined	allowed	C5	yellow541800	yellow	L	2	LR	1st	1	1	1	2
41800	Afternoon	confined - pheromone allowed	confined	allowed	C5	yellow541800	yellow	L	3	LR	1st	1	1	2	2
41800	Afternoon	confined - pheromone allowed	confined	allowed	C5	yellow541800	yellow	L	4	LR	1st	1	1	2
41800	Afternoon	confined - pheromone allowed	confined	allowed	C5	yellow541800	yellow	L	5	LR	1st	1	1
41800	Afternoon	confined - pheromone allowed	confined	allowed	C5	yellow541800	yellow	L	6	LR	1st	1	1	1	1
41800	Afternoon	confined - pheromone allowed	confined	allowed	C5	yellow541800	yellow	L	7	LL	1st	1	1
41800	Afternoon	confined - pheromone allowed	confined	allowed	C5	green541800	green	L	0	LR	1st				2
41800	Afternoon	confined - pheromone allowed	confined	allowed	C5	green541800	green	L	1	LR	1st	1	1	0	0
41800	Afternoon	confined - pheromone allowed	confined	allowed	C5	green541800	green	L	2	LR	1st	1	1	1	0
41800	Afternoon	confined - pheromone allowed	confined	allowed	C5	green541800	green	L	3	LR	1st	1	1	0	0
41800	Afternoon	confined - pheromone allowed	confined	allowed	C5	green541800	green	L	4	LR	1st	1	1	0
41800	Afternoon	confined - pheromone allowed	confined	allowed	C5	green541800	green	L	5	LR	1st	1	1	0	0
41800	Afternoon	confined - pheromone allowed	confined	allowed	C5	green541800	green	L	6	LR	1st	1	1	0	0
41800	Afternoon	confined - pheromone allowed	confined	allowed	C5	green541800	green	L	7	LR	1st	1	1	0
41800	Afternoon	confined - pheromone allowed	confined	allowed	C5	red541800	red	L	0		1st				1
41800	Afternoon	confined - pheromone allowed	confined	allowed	C5	red541800	red	L	1	LR	1st	1	1	5	2
41800	Afternoon	confined - pheromone allowed	confined	allowed	C5	red541800	red	L	2	LR	1st	1	1	3	2
41800	Afternoon	confined - pheromone allowed	confined	allowed	C5	red541800	red	L	3	LR	1st	1	1		0
41800	Afternoon	confined - pheromone allowed	confined	allowed	C5	red541800	red	L	4	LR	1st	1	1	1
41800	Afternoon	confined - pheromone allowed	confined	allowed	C5	red541800	red	L	5	LR	1st	1	1	2	0
41800	Afternoon	confined - pheromone allowed	confined	allowed	C5	red541800	red	L	6	LR	1st	1	1	2	0
41800	Afternoon	confined - pheromone allowed	confined	allowed	C5	red541800	red	L	7	LR	1st	1	1	2
41800	Afternoon	confined - pheromone allowed	confined	allowed	C5	orange541800	orange	L	0	LR	1st
41800	Afternoon	confined - pheromone allowed	confined	allowed	C5	orange541800	orange	L	1	LR	1st	1	1	0	0
41800	Afternoon	confined - pheromone allowed	confined	allowed	C5	orange541800	orange	L	2	LR	1st	1	1	0	2
41800	Afternoon	confined - pheromone allowed	confined	allowed	C5	orange541800	orange	L	3	LR	1st	1	1		2
41800	Afternoon	confined - pheromone allowed	confined	allowed	C5	orange541800	orange	L	4	LR	1st	1	1	0	2
41800	Afternoon	confined - pheromone allowed	confined	allowed	C5	orange541800	orange	L	5	LR	1st	1	1	0	1
41800	Afternoon	confined - pheromone allowed	confined	allowed	C5	orange541800	orange	L	6	LR	1st	1	1	0	0
41800	Afternoon	confined - pheromone allowed	confined	allowed	C5	orange541800	orange	L	7	RL	1st	0	0	0
41801	Morning	confined - pheromone allowed	confined	allowed	C6	blue641801	blue	L	0		1st				0
41801	Morning	confined - pheromone allowed	confined	allowed	C6	blue641801	blue	L	1	LR	1st	1	1	2	1
41801	Morning	confined - pheromone allowed	confined	allowed	C6	blue641801	blue	L	2	LR	1st	1	1	0	2
41801	Morning	confined - pheromone allowed	confined	allowed	C6	blue641801	blue	L	3	LR	1st	1	1	0	2
41801	Morning	confined - pheromone allowed	confined	allowed	C6	blue641801	blue	L	4	LR	1st	1	1	1
41801	Morning	confined - pheromone allowed	confined	allowed	C6	blue641801	blue	L	5	LR	1st	1	1	0	0
41801	Morning	confined - pheromone allowed	confined	allowed	C6	blue641801	blue	L	6	LR	1st	1	1	0	0
41801	Morning	confined - pheromone allowed	confined	allowed	C6	blue641801	blue	L	7	LL	1st	1	1	0
41801	Morning	confined - pheromone allowed	confined	allowed	C6	yellow641801	yellow	L	0		1st				0
41801	Morning	confined - pheromone allowed	confined	allowed	C6	yellow641801	yellow	L	1	LR	1st	1	1	2	2
41801	Morning	confined - pheromone allowed	confined	allowed	C6	yellow641801	yellow	L	2	LR	1st	1	1	3	0
41801	Morning	confined - pheromone allowed	confined	allowed	C6	yellow641801	yellow	L	3	LR	1st	1	1	4	0
41801	Morning	confined - pheromone allowed	confined	allowed	C6	yellow641801	yellow	L	4	LR	1st	1	1	3	0
41801	Morning	confined - pheromone allowed	confined	allowed	C6	yellow641801	yellow	L	5	LR	1st	1	1	2	0
41801	Morning	confined - pheromone allowed	confined	allowed	C6	yellow641801	yellow	L	6	LR	1st	1	1	0	0
41801	Morning	confined - pheromone allowed	confined	allowed	C6	yellow641801	yellow	L	7	RR	1st	0	0	0
41801	Morning	confined - pheromone allowed	confined	allowed	C6	green641801	green	L	0	LR	1st
41801	Morning	confined - pheromone allowed	confined	allowed	C6	green641801	green	L	1	LR	1st	1	1
41801	Morning	confined - pheromone allowed	confined	allowed	C6	green641801	green	L	2	LR	1st	1	1	0	2
41801	Morning	confined - pheromone allowed	confined	allowed	C6	green641801	green	L	3	LR	1st	1	1	3	1
41801	Morning	confined - pheromone allowed	confined	allowed	C6	green641801	green	L	4	LR	1st	1	1	1	1
41801	Morning	confined - pheromone allowed	confined	allowed	C6	green641801	green	L	5	LR	1st	1	1	2	0
41801	Morning	confined - pheromone allowed	confined	allowed	C6	green641801	green	L	6	LR	1st	1	1	0	1
41801	Morning	confined - pheromone allowed	confined	allowed	C6	green641801	green	L	7	LR	1st	1	1	0
41801	Morning	confined - pheromone allowed	confined	allowed	C6	red641801	red	L	0		1st
41801	Morning	confined - pheromone allowed	confined	allowed	C6	red641801	red	L	1	LR	1st	1	1	2	1
41801	Morning	confined - pheromone allowed	confined	allowed	C6	red641801	red	L	2	LR	1st	1	1	2	2
41801	Morning	confined - pheromone allowed	confined	allowed	C6	red641801	red	L	3	LR	1st	1	1	2	1
41801	Morning	confined - pheromone allowed	confined	allowed	C6	red641801	red	L	4	LR	1st	1	1	2	0
41801	Morning	confined - pheromone allowed	confined	allowed	C6	red641801	red	L	5	LR	1st	1	1	1	1
41801	Morning	confined - pheromone allowed	confined	allowed	C6	red641801	red	L	6	LR	1st	1	1	1	1
41801	Morning	confined - pheromone allowed	confined	allowed	C6	red641801	red	L	7	RR	1st	0	0	0
41801	Morning	confined - pheromone allowed	confined	allowed	C6	orange641801	orange	L	0	LR	1st
41801	Morning	confined - pheromone allowed	confined	allowed	C6	orange641801	orange	L	1	LR	1st	1	1	0	0
41801	Morning	confined - pheromone allowed	confined	allowed	C6	orange641801	orange	L	2	LR	1st	1	1	0
41801	Morning	confined - pheromone allowed	confined	allowed	C6	orange641801	orange	L	3	LR	1st	1	1
41801	Morning	confined - pheromone allowed	confined	allowed	C6	orange641801	orange	L	4	LR	1st	1	1	1
41801	Morning	confined - pheromone allowed	confined	allowed	C6	orange641801	orange	L	5	LR	1st	1	1	0	0
41801	Morning	confined - pheromone allowed	confined	allowed	C6	orange641801	orange	L	6	LR	1st	1	1		0
41801	Morning	confined - pheromone allowed	confined	allowed	C6	orange641801	orange	L	7	RL	1st	0	0	0
41801	Afternoon	confined - pheromone allowed	confined	allowed	C6	blue641801	blue	R	0		1st				0
41801	Afternoon	confined - pheromone allowed	confined	allowed	C6	blue641801	blue	R	1	RL	1st	1	1	0	0
41801	Afternoon	confined - pheromone allowed	confined	allowed	C6	blue641801	blue	R	2	RL	1st	1	1	1	0
41801	Afternoon	confined - pheromone allowed	confined	allowed	C6	blue641801	blue	R	3	RL	1st	1	1	0	1
41801	Afternoon	confined - pheromone allowed	confined	allowed	C6	blue641801	blue	R	4	RL	1st	1	1	1	2
41801	Afternoon	confined - pheromone allowed	confined	allowed	C6	blue641801	blue	R	5	RL	1st	1	1	2	0
41801	Afternoon	confined - pheromone allowed	confined	allowed	C6	blue641801	blue	R	6	RL	1st	1	1	1	0
41801	Afternoon	confined - pheromone allowed	confined	allowed	C6	blue641801	blue	R	7	LR	1st	0	0	0
41801	Afternoon	confined - pheromone allowed	confined	allowed	C6	yellow641801	yellow	R	0		1st
41801	Afternoon	confined - pheromone allowed	confined	allowed	C6	yellow641801	yellow	R	1	RL	1st	1	1	0	1
41801	Afternoon	confined - pheromone allowed	confined	allowed	C6	yellow641801	yellow	R	2	RL	1st	1	1	1	1
41801	Afternoon	confined - pheromone allowed	confined	allowed	C6	yellow641801	yellow	R	3	RL	1st	1	1	0	0
41801	Afternoon	confined - pheromone allowed	confined	allowed	C6	yellow641801	yellow	R	4	RL	1st	1	1	0
41801	Afternoon	confined - pheromone allowed	confined	allowed	C6	yellow641801	yellow	R	5	RL	1st	1	1	0	0
41801	Afternoon	confined - pheromone allowed	confined	allowed	C6	yellow641801	yellow	R	6	RL	1st	1	1	2	1
41801	Afternoon	confined - pheromone allowed	confined	allowed	C6	yellow641801	yellow	R	7	LR	1st	0	0	0
41801	Afternoon	confined - pheromone allowed	confined	allowed	C6	green641801	green	R	0		1st				1
41801	Afternoon	confined - pheromone allowed	confined	allowed	C6	green641801	green	R	1	RL	1st	1	1	1	0
41801	Afternoon	confined - pheromone allowed	confined	allowed	C6	green641801	green	R	2	RL	1st	1	1	0	0
41801	Afternoon	confined - pheromone allowed	confined	allowed	C6	green641801	green	R	3	RL	1st	1	1	1	1
41801	Afternoon	confined - pheromone allowed	confined	allowed	C6	green641801	green	R	4	RL	1st	1	1	1	0
41801	Afternoon	confined - pheromone allowed	confined	allowed	C6	green641801	green	R	5	RL	1st	1	1	1	2
41801	Afternoon	confined - pheromone allowed	confined	allowed	C6	green641801	green	R	6	RL	1st	1	1
41801	Afternoon	confined - pheromone allowed	confined	allowed	C6	green641801	green	R	7	RL	1st	1	1	0
41801	Afternoon	confined - pheromone allowed	confined	allowed	C6	red641801	red	R	0		1st
41801	Afternoon	confined - pheromone allowed	confined	allowed	C6	red641801	red	R	1	RL	1st	1	1	0	4
41801	Afternoon	confined - pheromone allowed	confined	allowed	C6	red641801	red	R	2	RL	1st	1	1	2	1
41801	Afternoon	confined - pheromone allowed	confined	allowed	C6	red641801	red	R	3	RL	1st	1	1	2	0
41801	Afternoon	confined - pheromone allowed	confined	allowed	C6	red641801	red	R	4	RL	1st	1	1	1
41801	Afternoon	confined - pheromone allowed	confined	allowed	C6	red641801	red	R	5	RL	1st	1	1	0	2
41801	Afternoon	confined - pheromone allowed	confined	allowed	C6	red641801	red	R	6	RL	1st	1	1	0	1
41801	Afternoon	confined - pheromone allowed	confined	allowed	C6	red641801	red	R	7	L*L	1st	0	0	0		1
41801	Afternoon	confined - pheromone allowed	confined	allowed	C6	orange641801	orange	R	0		1st				4
41801	Afternoon	confined - pheromone allowed	confined	allowed	C6	orange641801	orange	R	1	RL	1st	1	1	1	0
41801	Afternoon	confined - pheromone allowed	confined	allowed	C6	orange641801	orange	R	2	RL	1st	1	1	0	1
41801	Afternoon	confined - pheromone allowed	confined	allowed	C6	orange641801	orange	R	3	RL	1st	1	1	0	0
41801	Afternoon	confined - pheromone allowed	confined	allowed	C6	orange641801	orange	R	4	RL	1st	1	1	0	0
41801	Afternoon	confined - pheromone allowed	confined	allowed	C6	orange641801	orange	R	5	RL	1st	1	1	0	1
41801	Afternoon	confined - pheromone allowed	confined	allowed	C6	orange641801	orange	R	6		1st
41801	Afternoon	confined - pheromone allowed	confined	allowed	C6	orange641801	orange	R	7		1st
41802	Morning	confined - pheromone allowed	confined	allowed	C12	blue1241802	blue	R	0		1st
41802	Morning	confined - pheromone allowed	confined	allowed	C12	blue1241802	blue	R	1	RL	1st	1	1	0	2
41802	Morning	confined - pheromone allowed	confined	allowed	C12	blue1241802	blue	R	2	RL	1st	1	1	2	3
41802	Morning	confined - pheromone allowed	confined	allowed	C12	blue1241802	blue	R	3	RL	1st	1	1	0	0
41802	Morning	confined - pheromone allowed	confined	allowed	C12	blue1241802	blue	R	4	RL	1st	1	1	0	0
41802	Morning	confined - pheromone allowed	confined	allowed	C12	blue1241802	blue	R	5	RL	1st	1	1	0	0
41802	Morning	confined - pheromone allowed	confined	allowed	C12	blue1241802	blue	R	6	RL	1st	1	1	1	1
41802	Morning	confined - pheromone allowed	confined	allowed	C12	blue1241802	blue	R	7	LR	1st	0	0	1
41802	Morning	confined - pheromone allowed	confined	allowed	C12	yellow1241802	yellow	R	0		1st				2
41802	Morning	confined - pheromone allowed	confined	allowed	C12	yellow1241802	yellow	R	1	RL	1st	1	1	0	2
41802	Morning	confined - pheromone allowed	confined	allowed	C12	yellow1241802	yellow	R	2	RL	1st	1	1	3	2
41802	Morning	confined - pheromone allowed	confined	allowed	C12	yellow1241802	yellow	R	3	RL	1st	1	1	0
41802	Morning	confined - pheromone allowed	confined	allowed	C12	yellow1241802	yellow	R	4	RL	1st	1	1	2	2
41802	Morning	confined - pheromone allowed	confined	allowed	C12	yellow1241802	yellow	R	5	RL	1st	1	1		1
41802	Morning	confined - pheromone allowed	confined	allowed	C12	yellow1241802	yellow	R	6	RL	1st	1	1	1	1
41802	Morning	confined - pheromone allowed	confined	allowed	C12	yellow1241802	yellow	R	7	LL	1st	0	0	0
41802	Morning	confined - pheromone allowed	confined	allowed	C12	green1241802	green	R	0		1st
41802	Morning	confined - pheromone allowed	confined	allowed	C12	green1241802	green	R	1	RL	1st	1	1	0	0
41802	Morning	confined - pheromone allowed	confined	allowed	C12	green1241802	green	R	2	RL	1st	1	1	2	0
41802	Morning	confined - pheromone allowed	confined	allowed	C12	green1241802	green	R	3	RL	1st	1	1	0	0
41802	Morning	confined - pheromone allowed	confined	allowed	C12	green1241802	green	R	4	RL	1st	1	1	0	0
41802	Morning	confined - pheromone allowed	confined	allowed	C12	green1241802	green	R	5		1st
41802	Morning	confined - pheromone allowed	confined	allowed	C12	green1241802	green	R	6		1st
41802	Morning	confined - pheromone allowed	confined	allowed	C12	green1241802	green	R	7		1st
41802	Morning	confined - pheromone allowed	confined	allowed	C12	red1241802	red	R	0		1st				0
41802	Morning	confined - pheromone allowed	confined	allowed	C12	red1241802	red	R	1	RL	1st	1	1		0
41802	Morning	confined - pheromone allowed	confined	allowed	C12	red1241802	red	R	2	RL	1st	1	1	1	0
41802	Morning	confined - pheromone allowed	confined	allowed	C12	red1241802	red	R	3	RL	1st	1	1		0
41802	Morning	confined - pheromone allowed	confined	allowed	C12	red1241802	red	R	4	RL	1st	1	1	0	0
41802	Morning	confined - pheromone allowed	confined	allowed	C12	red1241802	red	R	5	RL	1st	1	1		1
41802	Morning	confined - pheromone allowed	confined	allowed	C12	red1241802	red	R	6	RL	1st	1	1	0	1
41802	Morning	confined - pheromone allowed	confined	allowed	C12	red1241802	red	R	7	RL	1st	1	1	1
41802	Morning	confined - pheromone allowed	confined	allowed	C12	orange1241802	orange	R	0		1st				0
41802	Morning	confined - pheromone allowed	confined	allowed	C12	orange1241802	orange	R	1	RL	1st	1	1	0	0
41802	Morning	confined - pheromone allowed	confined	allowed	C12	orange1241802	orange	R	2	RL	1st	1	1	0	1
41802	Morning	confined - pheromone allowed	confined	allowed	C12	orange1241802	orange	R	3	RL	1st	1	1	2	2
41802	Morning	confined - pheromone allowed	confined	allowed	C12	orange1241802	orange	R	4	RL	1st	1	1	1	1
41802	Morning	confined - pheromone allowed	confined	allowed	C12	orange1241802	orange	R	5	RL	1st	1	1	3	2
41802	Morning	confined - pheromone allowed	confined	allowed	C12	orange1241802	orange	R	6	RL	1st	1	1	1	1
41802	Morning	confined - pheromone allowed	confined	allowed	C12	orange1241802	orange	R	7	LL	1st	0	0	0
41802	Morning	confined - pheromone removed	confined	removed	C11	blue1141802	blue	R	0		1st				0
41802	Morning	confined - pheromone removed	confined	removed	C11	blue1141802	blue	R	1	RL	1st	1	1	0	0
41802	Morning	confined - pheromone removed	confined	removed	C11	blue1141802	blue	R	2	RL	1st	1	1	0	0
41802	Morning	confined - pheromone removed	confined	removed	C11	blue1141802	blue	R	3	RL	1st	1	1		0
41802	Morning	confined - pheromone removed	confined	removed	C11	blue1141802	blue	R	4	RL	1st	1	1	0	0
41802	Morning	confined - pheromone removed	confined	removed	C11	blue1141802	blue	R	5	RL	1st	1	1		0
41802	Morning	confined - pheromone removed	confined	removed	C11	blue1141802	blue	R	6	RL	1st	1	1	0	0
41802	Morning	confined - pheromone removed	confined	removed	C11	blue1141802	blue	R	7	LL	1st	0	0	0
41802	Morning	confined - pheromone removed	confined	removed	C11	yellow1141802	yellow	R	0		1st				0
41802	Morning	confined - pheromone removed	confined	removed	C11	yellow1141802	yellow	R	1	RL	1st	1	1	0
41802	Morning	confined - pheromone removed	confined	removed	C11	yellow1141802	yellow	R	2	RL	1st	1	1	1	0
41802	Morning	confined - pheromone removed	confined	removed	C11	yellow1141802	yellow	R	3	RL	1st	1	1		1
41802	Morning	confined - pheromone removed	confined	removed	C11	yellow1141802	yellow	R	4	RL	1st	1	1	1	2
41802	Morning	confined - pheromone removed	confined	removed	C11	yellow1141802	yellow	R	5	RL	1st	1	1	1	1
41802	Morning	confined - pheromone removed	confined	removed	C11	yellow1141802	yellow	R	6	RL	1st	1	1	0	1
41802	Morning	confined - pheromone removed	confined	removed	C11	yellow1141802	yellow	R	7	LL	1st	0	0	2
41802	Morning	confined - pheromone removed	confined	removed	C11	green1141802	green	R	0		1st
41802	Morning	confined - pheromone removed	confined	removed	C11	green1141802	green	R	1	RL	1st	1	1	0	2
41802	Morning	confined - pheromone removed	confined	removed	C11	green1141802	green	R	2	RL	1st	1	1	1	3
41802	Morning	confined - pheromone removed	confined	removed	C11	green1141802	green	R	3	RL	1st	1	1	0	2
41802	Morning	confined - pheromone removed	confined	removed	C11	green1141802	green	R	4	RL	1st	1	1	0	0
41802	Morning	confined - pheromone removed	confined	removed	C11	green1141802	green	R	5	RL	1st	1	1	0	1
41802	Morning	confined - pheromone removed	confined	removed	C11	green1141802	green	R	6	RL	1st	1	1	2	0
41802	Morning	confined - pheromone removed	confined	removed	C11	green1141802	green	R	7	LL	1st	0	0	0
41802	Morning	confined - pheromone removed	confined	removed	C11	red1141802	red	R	0		1st
41802	Morning	confined - pheromone removed	confined	removed	C11	red1141802	red	R	1	RL	1st	1	1	0
41802	Morning	confined - pheromone removed	confined	removed	C11	red1141802	red	R	2	RL	1st	1	1		4
41802	Morning	confined - pheromone removed	confined	removed	C11	red1141802	red	R	3	RL	1st	1	1	0	0
41802	Morning	confined - pheromone removed	confined	removed	C11	red1141802	red	R	4	RL	1st	1	1	0	0
41802	Morning	confined - pheromone removed	confined	removed	C11	red1141802	red	R	5	RL	1st	1	1	0
41802	Morning	confined - pheromone removed	confined	removed	C11	red1141802	red	R	6		1st
41802	Morning	confined - pheromone removed	confined	removed	C11	red1141802	red	R	7		1st
41802	Morning	confined - pheromone removed	confined	removed	C11	orange1141802	orange	R	0		1st				0
41802	Morning	confined - pheromone removed	confined	removed	C11	orange1141802	orange	R	1	RL	1st	1	1	4	2
41802	Morning	confined - pheromone removed	confined	removed	C11	orange1141802	orange	R	2	RL	1st	1	1	0	3
41802	Morning	confined - pheromone removed	confined	removed	C11	orange1141802	orange	R	3	RL	1st	1	1	1	2
41802	Morning	confined - pheromone removed	confined	removed	C11	orange1141802	orange	R	4	RL	1st	1	1	0	2
41802	Morning	confined - pheromone removed	confined	removed	C11	orange1141802	orange	R	5	RL	1st	1	1	0	3
41802	Morning	confined - pheromone removed	confined	removed	C11	orange1141802	orange	R	6	RL	1st	1	1	0	4
41802	Morning	confined - pheromone removed	confined	removed	C11	orange1141802	orange	R	7	LL	1st	0	0
41808	Morning	confined - pheromone allowed	confined	allowed	CRGB8	blueRGB841808	blue	R	0		1st
41808	Morning	confined - pheromone allowed	confined	allowed	CRGB8	blueRGB841808	blue	R	1	RL	1st	1	1		0
41808	Morning	confined - pheromone allowed	confined	allowed	CRGB8	blueRGB841808	blue	R	2	RL	1st	1	1
41808	Morning	confined - pheromone allowed	confined	allowed	CRGB8	blueRGB841808	blue	R	3	RL	1st	1	1		0
41808	Morning	confined - pheromone allowed	confined	allowed	CRGB8	blueRGB841808	blue	R	4	RL	1st	1	1	0	0
41808	Morning	confined - pheromone allowed	confined	allowed	CRGB8	blueRGB841808	blue	R	5	RL	1st	1	1		1
41808	Morning	confined - pheromone allowed	confined	allowed	CRGB8	blueRGB841808	blue	R	6	RL	1st	1	1	1	1
41808	Morning	confined - pheromone allowed	confined	allowed	CRGB8	blueRGB841808	blue	R	7	R*L	1st	1	1	0		1
41808	Morning	confined - pheromone allowed	confined	allowed	CRGB8	yellowRGB841808	yellow	R	0		1st				0
41808	Morning	confined - pheromone allowed	confined	allowed	CRGB8	yellowRGB841808	yellow	R	1	RL	1st	1	1	0
41808	Morning	confined - pheromone allowed	confined	allowed	CRGB8	yellowRGB841808	yellow	R	2	RL	1st	1	1	2
41808	Morning	confined - pheromone allowed	confined	allowed	CRGB8	yellowRGB841808	yellow	R	3	RL	1st	1	1	0	0
41808	Morning	confined - pheromone allowed	confined	allowed	CRGB8	yellowRGB841808	yellow	R	4	RL	1st	1	1	1
41808	Morning	confined - pheromone allowed	confined	allowed	CRGB8	yellowRGB841808	yellow	R	5	RL	1st	1	1	2
41808	Morning	confined - pheromone allowed	confined	allowed	CRGB8	yellowRGB841808	yellow	R	6		1st
41808	Morning	confined - pheromone allowed	confined	allowed	CRGB8	yellowRGB841808	yellow	R	7		1st
41808	Morning	confined - pheromone allowed	confined	allowed	CRGB8	greenRGB841808	green	R	0		1st
41808	Morning	confined - pheromone allowed	confined	allowed	CRGB8	greenRGB841808	green	R	1	RL	1st	1	1	4	1
41808	Morning	confined - pheromone allowed	confined	allowed	CRGB8	greenRGB841808	green	R	2	RL	1st	1	1
41808	Morning	confined - pheromone allowed	confined	allowed	CRGB8	greenRGB841808	green	R	3	RL	1st	1	1		0
41808	Morning	confined - pheromone allowed	confined	allowed	CRGB8	greenRGB841808	green	R	4	RL	1st	1	1
41808	Morning	confined - pheromone allowed	confined	allowed	CRGB8	greenRGB841808	green	R	5	RL	1st	1	1	0	0
41808	Morning	confined - pheromone allowed	confined	allowed	CRGB8	greenRGB841808	green	R	6	RL	1st	1	1	0	0
41808	Morning	confined - pheromone allowed	confined	allowed	CRGB8	greenRGB841808	green	R	7	RL	1st	1	1	3
41808	Morning	confined - pheromone allowed	confined	allowed	CRGB8	redRGB841808	red	R	0		1st				0
41808	Morning	confined - pheromone allowed	confined	allowed	CRGB8	redRGB841808	red	R	1	RL	1st	1	1	0	0
41808	Morning	confined - pheromone allowed	confined	allowed	CRGB8	redRGB841808	red	R	2	RL	1st	1	1	0	0
41808	Morning	confined - pheromone allowed	confined	allowed	CRGB8	redRGB841808	red	R	3	RL	1st	1	1		0
41808	Morning	confined - pheromone allowed	confined	allowed	CRGB8	redRGB841808	red	R	4	RL	1st	1	1	0
41808	Morning	confined - pheromone allowed	confined	allowed	CRGB8	redRGB841808	red	R	5	RL	1st	1	1		0
41808	Morning	confined - pheromone allowed	confined	allowed	CRGB8	redRGB841808	red	R	6	RL	1st	1	1	0	0
41808	Morning	confined - pheromone allowed	confined	allowed	CRGB8	redRGB841808	red	R	7	RL	1st	1	1	0
41808	Morning	confined - pheromone allowed	confined	allowed	CRGB8	orangeRGB841808	orange	R	0		1st
41808	Morning	confined - pheromone allowed	confined	allowed	CRGB8	orangeRGB841808	orange	R	1	RL	1st	1	1	4	1
41808	Morning	confined - pheromone allowed	confined	allowed	CRGB8	orangeRGB841808	orange	R	2	RL	1st	1	1	3	0
41808	Morning	confined - pheromone allowed	confined	allowed	CRGB8	orangeRGB841808	orange	R	3	RL	1st	1	1	0	0
41808	Morning	confined - pheromone allowed	confined	allowed	CRGB8	orangeRGB841808	orange	R	4	RL	1st	1	1		0
41808	Morning	confined - pheromone allowed	confined	allowed	CRGB8	orangeRGB841808	orange	R	5	RL	1st	1	1	0	0
41808	Morning	confined - pheromone allowed	confined	allowed	CRGB8	orangeRGB841808	orange	R	6	RL	1st	1	1	0	0
41808	Morning	confined - pheromone allowed	confined	allowed	CRGB8	orangeRGB841808	orange	R	7	LL	1st	0	0	0
41808	Morning	confined - pheromone allowed	confined	allowed	C888split	blue888split41808	blue	R	0		1st
41808	Morning	confined - pheromone allowed	confined	allowed	C888split	blue888split41808	blue	R	1	RL	1st	1	1	0	0
41808	Morning	confined - pheromone allowed	confined	allowed	C888split	blue888split41808	blue	R	2	RL	1st	1	1		0
41808	Morning	confined - pheromone allowed	confined	allowed	C888split	blue888split41808	blue	R	3	RL	1st	1	1		4
41808	Morning	confined - pheromone allowed	confined	allowed	C888split	blue888split41808	blue	R	4	RL	1st	1	1	1	1
41808	Morning	confined - pheromone allowed	confined	allowed	C888split	blue888split41808	blue	R	5	RL	1st	1	1	2	1
41808	Morning	confined - pheromone allowed	confined	allowed	C888split	blue888split41808	blue	R	6	RL	1st	1	1	0	0
41808	Morning	confined - pheromone allowed	confined	allowed	C888split	blue888split41808	blue	R	7	RR	1st	1	1	0
41808	Morning	confined - pheromone allowed	confined	allowed	C888split	yellow888split41808	yellow	R	0		1st				0
41808	Morning	confined - pheromone allowed	confined	allowed	C888split	yellow888split41808	yellow	R	1	RL	1st	1	1	1	1
41808	Morning	confined - pheromone allowed	confined	allowed	C888split	yellow888split41808	yellow	R	2	RL	1st	1	1		0
41808	Morning	confined - pheromone allowed	confined	allowed	C888split	yellow888split41808	yellow	R	3	RL	1st	1	1	0	1
41808	Morning	confined - pheromone allowed	confined	allowed	C888split	yellow888split41808	yellow	R	4	RL	1st	1	1	1	1
41808	Morning	confined - pheromone allowed	confined	allowed	C888split	yellow888split41808	yellow	R	5	RL	1st	1	1	0	0
41808	Morning	confined - pheromone allowed	confined	allowed	C888split	yellow888split41808	yellow	R	6	RL	1st	1	1	2	0
41808	Morning	confined - pheromone allowed	confined	allowed	C888split	yellow888split41808	yellow	R	7	R*L	1st	1	1	0		1
41808	Morning	confined - pheromone allowed	confined	allowed	C888split	green888split41808	green	R	0		1st
41808	Morning	confined - pheromone allowed	confined	allowed	C888split	green888split41808	green	R	1	RL	1st	1	1	1	2
41808	Morning	confined - pheromone allowed	confined	allowed	C888split	green888split41808	green	R	2	RL	1st	1	1	3	0
41808	Morning	confined - pheromone allowed	confined	allowed	C888split	green888split41808	green	R	3	RL	1st	1	1		0
41808	Morning	confined - pheromone allowed	confined	allowed	C888split	green888split41808	green	R	4	RL	1st	1	1	0	4
41808	Morning	confined - pheromone allowed	confined	allowed	C888split	green888split41808	green	R	5	RL	1st	1	1	0	0
41808	Morning	confined - pheromone allowed	confined	allowed	C888split	green888split41808	green	R	6	RL	1st	1	1	0	0
41808	Morning	confined - pheromone allowed	confined	allowed	C888split	green888split41808	green	R	7	LL	1st	0	0	0
41808	Morning	confined - pheromone allowed	confined	allowed	C888split	red888split41808	red	R	0		1st
41808	Morning	confined - pheromone allowed	confined	allowed	C888split	red888split41808	red	R	1	RL	1st	1	1	2	0
41808	Morning	confined - pheromone allowed	confined	allowed	C888split	red888split41808	red	R	2	RL	1st	1	1	0	0
41808	Morning	confined - pheromone allowed	confined	allowed	C888split	red888split41808	red	R	3	RL	1st	1	1		0
41808	Morning	confined - pheromone allowed	confined	allowed	C888split	red888split41808	red	R	4	RL	1st	1	1	0	0
41808	Morning	confined - pheromone allowed	confined	allowed	C888split	red888split41808	red	R	5	RL	1st	1	1	0	0
41808	Morning	confined - pheromone allowed	confined	allowed	C888split	red888split41808	red	R	6	RL	1st	1	1	0	1
41808	Morning	confined - pheromone allowed	confined	allowed	C888split	red888split41808	red	R	7	RL	1st	1	1	0
41808	Morning	confined - pheromone allowed	confined	allowed	C888split	orange888split41808	orange	R	0		1st				0
41808	Morning	confined - pheromone allowed	confined	allowed	C888split	orange888split41808	orange	R	1	RL	1st	1	1	1
41808	Morning	confined - pheromone allowed	confined	allowed	C888split	orange888split41808	orange	R	2	RL	1st	1	1	3	0
41808	Morning	confined - pheromone allowed	confined	allowed	C888split	orange888split41808	orange	R	3	RL	1st	1	1		1
41808	Morning	confined - pheromone allowed	confined	allowed	C888split	orange888split41808	orange	R	4	RL	1st	1	1	3	1
41808	Morning	confined - pheromone allowed	confined	allowed	C888split	orange888split41808	orange	R	5	RL	1st	1	1	2	0
41808	Morning	confined - pheromone allowed	confined	allowed	C888split	orange888split41808	orange	R	6	RL	1st	1	1	3	1
41808	Morning	confined - pheromone allowed	confined	allowed	C888split	orange888split41808	orange	R	7	L*L	1st	0	0	3
41808	Morning	confined - pheromone allowed	confined	allowed	C3	blue341808	blue	R	0		1st				0
41808	Morning	confined - pheromone allowed	confined	allowed	C3	blue341808	blue	R	1	RL	1st	1	1	0	1
41808	Morning	confined - pheromone allowed	confined	allowed	C3	blue341808	blue	R	2	RL	1st	1	1	1	2
41808	Morning	confined - pheromone allowed	confined	allowed	C3	blue341808	blue	R	3	RL	1st	1	1	0	0
41808	Morning	confined - pheromone allowed	confined	allowed	C3	blue341808	blue	R	4	RL	1st	1	1	0	3
41808	Morning	confined - pheromone allowed	confined	allowed	C3	blue341808	blue	R	5	RL	1st	1	1	0	0
41808	Morning	confined - pheromone allowed	confined	allowed	C3	blue341808	blue	R	6	RL	1st	1	1	0	0
41808	Morning	confined - pheromone allowed	confined	allowed	C3	blue341808	blue	R	7	LL	1st	0	0	0
41808	Morning	confined - pheromone allowed	confined	allowed	C3	yellow341808	yellow	R	0		1st
41808	Morning	confined - pheromone allowed	confined	allowed	C3	yellow341808	yellow	R	1		1st
41808	Morning	confined - pheromone allowed	confined	allowed	C3	yellow341808	yellow	R	2		1st
41808	Morning	confined - pheromone allowed	confined	allowed	C3	yellow341808	yellow	R	3		1st
41808	Morning	confined - pheromone allowed	confined	allowed	C3	yellow341808	yellow	R	4		1st
41808	Morning	confined - pheromone allowed	confined	allowed	C3	yellow341808	yellow	R	5		1st
41808	Morning	confined - pheromone allowed	confined	allowed	C3	yellow341808	yellow	R	6		1st
41808	Morning	confined - pheromone allowed	confined	allowed	C3	yellow341808	yellow	R	7		1st
41808	Morning	confined - pheromone allowed	confined	allowed	C3	green341808	green	R	0		1st				0
41808	Morning	confined - pheromone allowed	confined	allowed	C3	green341808	green	R	1	RL	1st	1	1
41808	Morning	confined - pheromone allowed	confined	allowed	C3	green341808	green	R	2	RL	1st	1	1		1
41808	Morning	confined - pheromone allowed	confined	allowed	C3	green341808	green	R	3	RL	1st	1	1	3	1
41808	Morning	confined - pheromone allowed	confined	allowed	C3	green341808	green	R	4	RL	1st	1	1	0	4
41808	Morning	confined - pheromone allowed	confined	allowed	C3	green341808	green	R	5	RL	1st	1	1
41808	Morning	confined - pheromone allowed	confined	allowed	C3	green341808	green	R	6		1st
41808	Morning	confined - pheromone allowed	confined	allowed	C3	green341808	green	R	7		1st
41808	Morning	confined - pheromone allowed	confined	allowed	C3	red341808	red	R	0		1st				0
41808	Morning	confined - pheromone allowed	confined	allowed	C3	red341808	red	R	1	RL	1st	1	1	2	0
41808	Morning	confined - pheromone allowed	confined	allowed	C3	red341808	red	R	2	RL	1st	1	1	2
41808	Morning	confined - pheromone allowed	confined	allowed	C3	red341808	red	R	3	RL	1st	1	1	3	2
41808	Morning	confined - pheromone allowed	confined	allowed	C3	red341808	red	R	4	RL	1st	1	1		2
41808	Morning	confined - pheromone allowed	confined	allowed	C3	red341808	red	R	5	RL	1st	1	1	0	0
41808	Morning	confined - pheromone allowed	confined	allowed	C3	red341808	red	R	6	RL	1st	1	1	0	0
41808	Morning	confined - pheromone allowed	confined	allowed	C3	red341808	red	R	7	LL	1st	0	0	0
41808	Morning	confined - pheromone allowed	confined	allowed	C3	orange341808	orange	R	0		1st				1
41808	Morning	confined - pheromone allowed	confined	allowed	C3	orange341808	orange	R	1	RL	1st	1	1	0	0
41808	Morning	confined - pheromone allowed	confined	allowed	C3	orange341808	orange	R	2	RL	1st	1	1	1	2
41808	Morning	confined - pheromone allowed	confined	allowed	C3	orange341808	orange	R	3	RL	1st	1	1	2	2
41808	Morning	confined - pheromone allowed	confined	allowed	C3	orange341808	orange	R	4	RL	1st	1	1	4
41808	Morning	confined - pheromone allowed	confined	allowed	C3	orange341808	orange	R	5	RL	1st	1	1	4	2
41808	Morning	confined - pheromone allowed	confined	allowed	C3	orange341808	orange	R	6	RL	1st	1	1	0	0
41808	Morning	confined - pheromone allowed	confined	allowed	C3	orange341808	orange	R	7	R*L	1st	1	1	0		1
41808	Afternoon	confined - pheromone allowed	confined	allowed	CRGB8	blueRGB841808	blue	L	0		1st				0
41808	Afternoon	confined - pheromone allowed	confined	allowed	CRGB8	blueRGB841808	blue	L	1	LR	1st	1	1	1	1
41808	Afternoon	confined - pheromone allowed	confined	allowed	CRGB8	blueRGB841808	blue	L	2	LR	1st	1	1	0	2
41808	Afternoon	confined - pheromone allowed	confined	allowed	CRGB8	blueRGB841808	blue	L	3	LR	1st	1	1	4	2
41808	Afternoon	confined - pheromone allowed	confined	allowed	CRGB8	blueRGB841808	blue	L	4	LR	1st	1	1	2	3
41808	Afternoon	confined - pheromone allowed	confined	allowed	CRGB8	blueRGB841808	blue	L	5		1st
41808	Afternoon	confined - pheromone allowed	confined	allowed	CRGB8	blueRGB841808	blue	L	6		1st
41808	Afternoon	confined - pheromone allowed	confined	allowed	CRGB8	blueRGB841808	blue	L	7		1st
41808	Afternoon	confined - pheromone allowed	confined	allowed	CRGB8	yellowRGB841808	yellow	L	0		1st
41808	Afternoon	confined - pheromone allowed	confined	allowed	CRGB8	yellowRGB841808	yellow	L	1	LR	1st	1	1	0	0
41808	Afternoon	confined - pheromone allowed	confined	allowed	CRGB8	yellowRGB841808	yellow	L	2	LR	1st	1	1	0	0
41808	Afternoon	confined - pheromone allowed	confined	allowed	CRGB8	yellowRGB841808	yellow	L	3	LR	1st	1	1	0	0
41808	Afternoon	confined - pheromone allowed	confined	allowed	CRGB8	yellowRGB841808	yellow	L	4	LR	1st	1	1		0
41808	Afternoon	confined - pheromone allowed	confined	allowed	CRGB8	yellowRGB841808	yellow	L	5	LR	1st	1	1		0
41808	Afternoon	confined - pheromone allowed	confined	allowed	CRGB8	yellowRGB841808	yellow	L	6	LR	1st	1	1	0	0
41808	Afternoon	confined - pheromone allowed	confined	allowed	CRGB8	yellowRGB841808	yellow	L	7	RL	1st	0	0	0
41808	Afternoon	confined - pheromone allowed	confined	allowed	CRGB8	greenRGB841808	green	L	0	LR	1st
41808	Afternoon	confined - pheromone allowed	confined	allowed	CRGB8	greenRGB841808	green	L	1	LR	1st	1	1	6	0
41808	Afternoon	confined - pheromone allowed	confined	allowed	CRGB8	greenRGB841808	green	L	2	LR	1st	1	1		1
41808	Afternoon	confined - pheromone allowed	confined	allowed	CRGB8	greenRGB841808	green	L	3	LR	1st	1	1		2
41808	Afternoon	confined - pheromone allowed	confined	allowed	CRGB8	greenRGB841808	green	L	4	LR	1st	1	1		2
41808	Afternoon	confined - pheromone allowed	confined	allowed	CRGB8	greenRGB841808	green	L	5	LR	1st	1	1	0	0
41808	Afternoon	confined - pheromone allowed	confined	allowed	CRGB8	greenRGB841808	green	L	6	LR	1st	1	1	0	0
41808	Afternoon	confined - pheromone allowed	confined	allowed	CRGB8	greenRGB841808	green	L	7	RR	1st	0	0	0
41808	Afternoon	confined - pheromone allowed	confined	allowed	CRGB8	redRGB841808	red	L	0		1st
41808	Afternoon	confined - pheromone allowed	confined	allowed	CRGB8	redRGB841808	red	L	1	LR	1st	1	1		0
41808	Afternoon	confined - pheromone allowed	confined	allowed	CRGB8	redRGB841808	red	L	2	LR	1st	1	1	0	1
41808	Afternoon	confined - pheromone allowed	confined	allowed	CRGB8	redRGB841808	red	L	3	LR	1st	1	1	0	0
41808	Afternoon	confined - pheromone allowed	confined	allowed	CRGB8	redRGB841808	red	L	4	LR	1st	1	1	1	0
41808	Afternoon	confined - pheromone allowed	confined	allowed	CRGB8	redRGB841808	red	L	5	LR	1st	1	1	0	0
41808	Afternoon	confined - pheromone allowed	confined	allowed	CRGB8	redRGB841808	red	L	6	LR	1st	1	1	0	1
41808	Afternoon	confined - pheromone allowed	confined	allowed	CRGB8	redRGB841808	red	L	7	LL	1st	1	1	0
41808	Afternoon	confined - pheromone allowed	confined	allowed	CRGB8	orangeRGB841808	orange	L	0	LR	1st
41808	Afternoon	confined - pheromone allowed	confined	allowed	CRGB8	orangeRGB841808	orange	L	1	LR	1st	1	1	4	1
41808	Afternoon	confined - pheromone allowed	confined	allowed	CRGB8	orangeRGB841808	orange	L	2	LR	1st	1	1	2
41808	Afternoon	confined - pheromone allowed	confined	allowed	CRGB8	orangeRGB841808	orange	L	3	LR	1st	1	1		0
41808	Afternoon	confined - pheromone allowed	confined	allowed	CRGB8	orangeRGB841808	orange	L	4	LR	1st	1	1	0	0
41808	Afternoon	confined - pheromone allowed	confined	allowed	CRGB8	orangeRGB841808	orange	L	5	LR	1st	1	1	0	1
41808	Afternoon	confined - pheromone allowed	confined	allowed	CRGB8	orangeRGB841808	orange	L	6	LR	1st	1	1	0	0
41808	Afternoon	confined - pheromone allowed	confined	allowed	CRGB8	orangeRGB841808	orange	L	7	LR	1st	1	1	0
41808	Afternoon	confined - pheromone allowed	confined	allowed	C3	blue341808	blue	L	0		1st
41808	Afternoon	confined - pheromone allowed	confined	allowed	C3	blue341808	blue	L	1	LR	1st	1	1	3	3
41808	Afternoon	confined - pheromone allowed	confined	allowed	C3	blue341808	blue	L	2	LR	1st	1	1	3	0
41808	Afternoon	confined - pheromone allowed	confined	allowed	C3	blue341808	blue	L	3	LR	1st	1	1	2	1
41808	Afternoon	confined - pheromone allowed	confined	allowed	C3	blue341808	blue	L	4	LR	1st	1	1	0	0
41808	Afternoon	confined - pheromone allowed	confined	allowed	C3	blue341808	blue	L	5	LR	1st	1	1	0	0
41808	Afternoon	confined - pheromone allowed	confined	allowed	C3	blue341808	blue	L	6	LR	1st	1	1	0	0
41808	Afternoon	confined - pheromone allowed	confined	allowed	C3	blue341808	blue	L	7	LL	1st	1	1	0
41808	Afternoon	confined - pheromone allowed	confined	allowed	C3	yellow341808	yellow	L	0		1st
41808	Afternoon	confined - pheromone allowed	confined	allowed	C3	yellow341808	yellow	L	1	LR	1st	1	1
41808	Afternoon	confined - pheromone allowed	confined	allowed	C3	yellow341808	yellow	L	2	LR	1st	1	1	1	0
41808	Afternoon	confined - pheromone allowed	confined	allowed	C3	yellow341808	yellow	L	3	LR	1st	1	1	2
41808	Afternoon	confined - pheromone allowed	confined	allowed	C3	yellow341808	yellow	L	4	LR	1st	1	1	1	1
41808	Afternoon	confined - pheromone allowed	confined	allowed	C3	yellow341808	yellow	L	5	LR	1st	1	1		1
41808	Afternoon	confined - pheromone allowed	confined	allowed	C3	yellow341808	yellow	L	6	LR	1st	1	1		0
41808	Afternoon	confined - pheromone allowed	confined	allowed	C3	yellow341808	yellow	L	7	R*L	1st	0	0	0		1
41808	Afternoon	confined - pheromone allowed	confined	allowed	C3	green341808	green	L	0	LR	1st
41808	Afternoon	confined - pheromone allowed	confined	allowed	C3	green341808	green	L	1	LR	1st	1	1		4
41808	Afternoon	confined - pheromone allowed	confined	allowed	C3	green341808	green	L	2	LR	1st	1	1	4	3
41808	Afternoon	confined - pheromone allowed	confined	allowed	C3	green341808	green	L	3	LR	1st	1	1	1	3
41808	Afternoon	confined - pheromone allowed	confined	allowed	C3	green341808	green	L	4	LR	1st	1	1		2
41808	Afternoon	confined - pheromone allowed	confined	allowed	C3	green341808	green	L	5	LR	1st	1	1	3	2
41808	Afternoon	confined - pheromone allowed	confined	allowed	C3	green341808	green	L	6	LR	1st	1	1	2	1
41808	Afternoon	confined - pheromone allowed	confined	allowed	C3	green341808	green	L	7	RR	1st	0	0	0
41808	Afternoon	confined - pheromone allowed	confined	allowed	C3	red341808	red	L	0		1st
41808	Afternoon	confined - pheromone allowed	confined	allowed	C3	red341808	red	L	1	LR	1st	1	1	2	4
41808	Afternoon	confined - pheromone allowed	confined	allowed	C3	red341808	red	L	2	LR	1st	1	1	5	3
41808	Afternoon	confined - pheromone allowed	confined	allowed	C3	red341808	red	L	3	LR	1st	1	1	3	2
41808	Afternoon	confined - pheromone allowed	confined	allowed	C3	red341808	red	L	4	LR	1st	1	1	2	1
41808	Afternoon	confined - pheromone allowed	confined	allowed	C3	red341808	red	L	5	LR	1st	1	1	4	1
41808	Afternoon	confined - pheromone allowed	confined	allowed	C3	red341808	red	L	6	LR	1st	1	1		2
41808	Afternoon	confined - pheromone allowed	confined	allowed	C3	red341808	red	L	7	RR	1st	0	0	0
41808	Afternoon	confined - pheromone allowed	confined	allowed	C3	orange341808	orange	L	0	LR	1st
41808	Afternoon	confined - pheromone allowed	confined	allowed	C3	orange341808	orange	L	1	LR	1st	1	1	0	3
41808	Afternoon	confined - pheromone allowed	confined	allowed	C3	orange341808	orange	L	2	LR	1st	1	1	2	1
41808	Afternoon	confined - pheromone allowed	confined	allowed	C3	orange341808	orange	L	3	LR	1st	1	1	0	1
41808	Afternoon	confined - pheromone allowed	confined	allowed	C3	orange341808	orange	L	4	LR	1st	1	1
41808	Afternoon	confined - pheromone allowed	confined	allowed	C3	orange341808	orange	L	5	LR	1st	1	1	0	0
41808	Afternoon	confined - pheromone allowed	confined	allowed	C3	orange341808	orange	L	6	LR	1st	1	1	0
41808	Afternoon	confined - pheromone allowed	confined	allowed	C3	orange341808	orange	L	7		1st
41809	Morning	confined - pheromone allowed	confined	allowed	C11	blue1141809	blue	L	0		1st				3
41809	Morning	confined - pheromone allowed	confined	allowed	C11	blue1141809	blue	L	1	LR	1st	1	1		2
41809	Morning	confined - pheromone allowed	confined	allowed	C11	blue1141809	blue	L	2	LR	1st	1	1	3	3
41809	Morning	confined - pheromone allowed	confined	allowed	C11	blue1141809	blue	L	3	LR	1st	1	1		2
41809	Morning	confined - pheromone allowed	confined	allowed	C11	blue1141809	blue	L	4	LR	1st	1	1	1	1
41809	Morning	confined - pheromone allowed	confined	allowed	C11	blue1141809	blue	L	5	LR	1st	1	1	0	0
41809	Morning	confined - pheromone allowed	confined	allowed	C11	blue1141809	blue	L	6	LR	1st	1	1	0	0
41809	Morning	confined - pheromone allowed	confined	allowed	C11	blue1141809	blue	L	7	RL	1st	0	0	0
41809	Morning	confined - pheromone allowed	confined	allowed	C11	yellow1141809	yellow	L	0		1st
41809	Morning	confined - pheromone allowed	confined	allowed	C11	yellow1141809	yellow	L	1	LR	1st	1	1	1	4
41809	Morning	confined - pheromone allowed	confined	allowed	C11	yellow1141809	yellow	L	2	LR	1st	1	1	3	2
41809	Morning	confined - pheromone allowed	confined	allowed	C11	yellow1141809	yellow	L	3	LR	1st	1	1	2	0
41809	Morning	confined - pheromone allowed	confined	allowed	C11	yellow1141809	yellow	L	4	LR	1st	1	1	3	0
41809	Morning	confined - pheromone allowed	confined	allowed	C11	yellow1141809	yellow	L	5	LR	1st	1	1	2	1
41809	Morning	confined - pheromone allowed	confined	allowed	C11	yellow1141809	yellow	L	6	LR	1st	1	1	1	1
41809	Morning	confined - pheromone allowed	confined	allowed	C11	yellow1141809	yellow	L	7	R*L	1st	0	0	0		1
41809	Morning	confined - pheromone allowed	confined	allowed	C11	green1141809	green	L	0	LR	1st
41809	Morning	confined - pheromone allowed	confined	allowed	C11	green1141809	green	L	1	LR	1st	1	1
41809	Morning	confined - pheromone allowed	confined	allowed	C11	green1141809	green	L	2	LR	1st	1	1	2	2
41809	Morning	confined - pheromone allowed	confined	allowed	C11	green1141809	green	L	3	LR	1st	1	1	2	3
41809	Morning	confined - pheromone allowed	confined	allowed	C11	green1141809	green	L	4	LR	1st	1	1	2	2
41809	Morning	confined - pheromone allowed	confined	allowed	C11	green1141809	green	L	5	LR	1st	1	1	1
41809	Morning	confined - pheromone allowed	confined	allowed	C11	green1141809	green	L	6	LR	1st	1	1	0	3
41809	Morning	confined - pheromone allowed	confined	allowed	C11	green1141809	green	L	7	RR	1st	0	0
41809	Morning	confined - pheromone allowed	confined	allowed	C11	red1141809	red	L	0		1st				0
41809	Morning	confined - pheromone allowed	confined	allowed	C11	red1141809	red	L	1	LR	1st	1	1
41809	Morning	confined - pheromone allowed	confined	allowed	C11	red1141809	red	L	2	LR	1st	1	1	3	3
41809	Morning	confined - pheromone allowed	confined	allowed	C11	red1141809	red	L	3	LR	1st	1	1	3	2
41809	Morning	confined - pheromone allowed	confined	allowed	C11	red1141809	red	L	4	LR	1st	1	1
41809	Morning	confined - pheromone allowed	confined	allowed	C11	red1141809	red	L	5	LR	1st	1	1	2	1
41809	Morning	confined - pheromone allowed	confined	allowed	C11	red1141809	red	L	6	LR	1st	1	1	1	1
41809	Morning	confined - pheromone allowed	confined	allowed	C11	red1141809	red	L	7	L*R	1st	1	1	0		1
41809	Morning	confined - pheromone allowed	confined	allowed	C11	orange1141809	orange	L	0	LR	1st				0
41809	Morning	confined - pheromone allowed	confined	allowed	C11	orange1141809	orange	L	1	LR	1st	1	1	0
41809	Morning	confined - pheromone allowed	confined	allowed	C11	orange1141809	orange	L	2	LR	1st	1	1	2
41809	Morning	confined - pheromone allowed	confined	allowed	C11	orange1141809	orange	L	3	LR	1st	1	1	1	2
41809	Morning	confined - pheromone allowed	confined	allowed	C11	orange1141809	orange	L	4	LR	1st	1	1	0	1
41809	Morning	confined - pheromone allowed	confined	allowed	C11	orange1141809	orange	L	5	LR	1st	1	1	0	2
41809	Morning	confined - pheromone allowed	confined	allowed	C11	orange1141809	orange	L	6	LR	1st	1	1	1	0
41809	Morning	confined - pheromone allowed	confined	allowed	C11	orange1141809	orange	L	7	R*L	1st	0	0	1		1
41809	Morning	confined - pheromone allowed	confined	allowed	C11	blue1141809	blue	R	0		1st
41809	Morning	confined - pheromone allowed	confined	allowed	C11	blue1141809	blue	R	1	RL	1st	1	1	1	3
41809	Morning	confined - pheromone allowed	confined	allowed	C11	blue1141809	blue	R	2	RL	1st	1	1	0	3
41809	Morning	confined - pheromone allowed	confined	allowed	C11	blue1141809	blue	R	3	RL	1st	1	1	3	1
41809	Morning	confined - pheromone allowed	confined	allowed	C11	blue1141809	blue	R	4	RL	1st	1	1	2
41809	Morning	confined - pheromone allowed	confined	allowed	C11	blue1141809	blue	R	5	RL	1st	1	1	0	1
41809	Morning	confined - pheromone allowed	confined	allowed	C11	blue1141809	blue	R	6	RL	1st	1	1	0
41809	Morning	confined - pheromone allowed	confined	allowed	C11	blue1141809	blue	R	7	L*L	1st	0	0	1		1
41809	Morning	confined - pheromone allowed	confined	allowed	C11	yellow1141809	yellow	R	0		1st
41809	Morning	confined - pheromone allowed	confined	allowed	C11	yellow1141809	yellow	R	1	RL	1st	1	1	1	0
41809	Morning	confined - pheromone allowed	confined	allowed	C11	yellow1141809	yellow	R	2	RL	1st	1	1	0	0
41809	Morning	confined - pheromone allowed	confined	allowed	C11	yellow1141809	yellow	R	3	RL	1st	1	1		6
41809	Morning	confined - pheromone allowed	confined	allowed	C11	yellow1141809	yellow	R	4	RL	1st	1	1	0	0
41809	Morning	confined - pheromone allowed	confined	allowed	C11	yellow1141809	yellow	R	5	RL	1st	1	1
41809	Morning	confined - pheromone allowed	confined	allowed	C11	yellow1141809	yellow	R	6	RL	1st	1	1	1	0
41809	Morning	confined - pheromone allowed	confined	allowed	C11	yellow1141809	yellow	R	7	LL	1st	0	0	1
41809	Morning	confined - pheromone allowed	confined	allowed	C11	green1141809	green	R	0	RL	1st
41809	Morning	confined - pheromone allowed	confined	allowed	C11	green1141809	green	R	1	RL	1st	1	1	3
41809	Morning	confined - pheromone allowed	confined	allowed	C11	green1141809	green	R	2	RL	1st	1	1	0	1
41809	Morning	confined - pheromone allowed	confined	allowed	C11	green1141809	green	R	3	RL	1st	1	1	0
41809	Morning	confined - pheromone allowed	confined	allowed	C11	green1141809	green	R	4	RL	1st	1	1	1	2
41809	Morning	confined - pheromone allowed	confined	allowed	C11	green1141809	green	R	5	RL	1st	1	1		0
41809	Morning	confined - pheromone allowed	confined	allowed	C11	green1141809	green	R	6	RL	1st	1	1	0	0
41809	Morning	confined - pheromone allowed	confined	allowed	C11	green1141809	green	R	7	LL	1st	0	0	0
41809	Morning	confined - pheromone allowed	confined	allowed	C11	red1141809	red	R	0		1st				2
41809	Morning	confined - pheromone allowed	confined	allowed	C11	red1141809	red	R	1	RL	1st	1	1	1	2
41809	Morning	confined - pheromone allowed	confined	allowed	C11	red1141809	red	R	2	RL	1st	1	1		2
41809	Morning	confined - pheromone allowed	confined	allowed	C11	red1141809	red	R	3	RL	1st	1	1	3	3
41809	Morning	confined - pheromone allowed	confined	allowed	C11	red1141809	red	R	4	RL	1st	1	1	2	3
41809	Morning	confined - pheromone allowed	confined	allowed	C11	red1141809	red	R	5	RL	1st	1	1	3	2
41809	Morning	confined - pheromone allowed	confined	allowed	C11	red1141809	red	R	6	RL	1st	1	1	0	0
41809	Morning	confined - pheromone allowed	confined	allowed	C11	red1141809	red	R	7	L*L	1st	0	0	1		1
41809	Morning	confined - pheromone allowed	confined	allowed	C11	orange1141809	orange	R	0		1st
41809	Morning	confined - pheromone allowed	confined	allowed	C11	orange1141809	orange	R	1	RL	1st	1	1	1
41809	Morning	confined - pheromone allowed	confined	allowed	C11	orange1141809	orange	R	2	RL	1st	1	1	0	0
41809	Morning	confined - pheromone allowed	confined	allowed	C11	orange1141809	orange	R	3	RL	1st	1	1		0
41809	Morning	confined - pheromone allowed	confined	allowed	C11	orange1141809	orange	R	4	RL	1st	1	1	0	0
41809	Morning	confined - pheromone allowed	confined	allowed	C11	orange1141809	orange	R	5	RL	1st	1	1		0
41809	Morning	confined - pheromone allowed	confined	allowed	C11	orange1141809	orange	R	6	RL	1st	1	1	1	1
41809	Morning	confined - pheromone allowed	confined	allowed	C11	orange1141809	orange	R	7	LL	1st	0	0	1
41809	Morning	confined - pheromone allowed	confined	allowed	C12	blue1241809	blue	L	0		1st				0
41809	Morning	confined - pheromone allowed	confined	allowed	C12	blue1241809	blue	L	1	LR	1st	1	1	0
41809	Morning	confined - pheromone allowed	confined	allowed	C12	blue1241809	blue	L	2		1st
41809	Morning	confined - pheromone allowed	confined	allowed	C12	blue1241809	blue	L	3		1st
41809	Morning	confined - pheromone allowed	confined	allowed	C12	blue1241809	blue	L	4		1st
41809	Morning	confined - pheromone allowed	confined	allowed	C12	blue1241809	blue	L	5		1st
41809	Morning	confined - pheromone allowed	confined	allowed	C12	blue1241809	blue	L	6		1st
41809	Morning	confined - pheromone allowed	confined	allowed	C12	blue1241809	blue	L	7		1st
41809	Morning	confined - pheromone allowed	confined	allowed	C12	yellow1241809	yellow	L	0		1st
41809	Morning	confined - pheromone allowed	confined	allowed	C12	yellow1241809	yellow	L	1	LR	1st	1	1		2
41809	Morning	confined - pheromone allowed	confined	allowed	C12	yellow1241809	yellow	L	2	LR	1st	1	1	4
41809	Morning	confined - pheromone allowed	confined	allowed	C12	yellow1241809	yellow	L	3	LR	1st	1	1	0	1
41809	Morning	confined - pheromone allowed	confined	allowed	C12	yellow1241809	yellow	L	4	LR	1st	1	1	1	0
41809	Morning	confined - pheromone allowed	confined	allowed	C12	yellow1241809	yellow	L	5	LR	1st	1	1	0	0
41809	Morning	confined - pheromone allowed	confined	allowed	C12	yellow1241809	yellow	L	6	LR	1st	1	1	0	0
41809	Morning	confined - pheromone allowed	confined	allowed	C12	yellow1241809	yellow	L	7	RR	1st	0	0	0
41809	Morning	confined - pheromone allowed	confined	allowed	C12	green1241809	green	L	0	LR	1st				0
41809	Morning	confined - pheromone allowed	confined	allowed	C12	green1241809	green	L	1	LR	1st	1	1	0
41809	Morning	confined - pheromone allowed	confined	allowed	C12	green1241809	green	L	2	LR	1st	1	1	2	4
41809	Morning	confined - pheromone allowed	confined	allowed	C12	green1241809	green	L	3	LR	1st	1	1	0
41809	Morning	confined - pheromone allowed	confined	allowed	C12	green1241809	green	L	4	LR	1st	1	1	0	2
41809	Morning	confined - pheromone allowed	confined	allowed	C12	green1241809	green	L	5	LR	1st	1	1	0	3
41809	Morning	confined - pheromone allowed	confined	allowed	C12	green1241809	green	L	6	LR	1st	1	1	1	2
41809	Morning	confined - pheromone allowed	confined	allowed	C12	green1241809	green	L	7	RL	1st	0	0	2
41809	Morning	confined - pheromone allowed	confined	allowed	C12	red1241809	red	L	0		1st
41809	Morning	confined - pheromone allowed	confined	allowed	C12	red1241809	red	L	1	LR	1st	1	1		0
41809	Morning	confined - pheromone allowed	confined	allowed	C12	red1241809	red	L	2	LR	1st	1	1	3
41809	Morning	confined - pheromone allowed	confined	allowed	C12	red1241809	red	L	3	LR	1st	1	1
41809	Morning	confined - pheromone allowed	confined	allowed	C12	red1241809	red	L	4	LR	1st	1	1		0
41809	Morning	confined - pheromone allowed	confined	allowed	C12	red1241809	red	L	5	LR	1st	1	1	0	0
41809	Morning	confined - pheromone allowed	confined	allowed	C12	red1241809	red	L	6	LR	1st	1	1
41809	Morning	confined - pheromone allowed	confined	allowed	C12	red1241809	red	L	7	RR	1st	0	0	0
41809	Morning	confined - pheromone allowed	confined	allowed	C12	orange1241809	orange	L	0	LR	1st
41809	Morning	confined - pheromone allowed	confined	allowed	C12	orange1241809	orange	L	1	LR	1st	1	1		4
41809	Morning	confined - pheromone allowed	confined	allowed	C12	orange1241809	orange	L	2	LR	1st	1	1	2	3
41809	Morning	confined - pheromone allowed	confined	allowed	C12	orange1241809	orange	L	3	LR	1st	1	1		3
41809	Morning	confined - pheromone allowed	confined	allowed	C12	orange1241809	orange	L	4	LR	1st	1	1	3	1
41809	Morning	confined - pheromone allowed	confined	allowed	C12	orange1241809	orange	L	5	LR	1st	1	1	3
41809	Morning	confined - pheromone allowed	confined	allowed	C12	orange1241809	orange	L	6	LR	1st	1	1	2	2
41809	Morning	confined - pheromone allowed	confined	allowed	C12	orange1241809	orange	L	7	RR	1st	0	0	0
41816	Afternoon	confined - pheromone allowed	confined	allowed	C11	blue1141816	blue	R	0		1st				1
41816	Afternoon	confined - pheromone allowed	confined	allowed	C11	blue1141816	blue	R	1	RL	1st	1	1	0	1
41816	Afternoon	confined - pheromone allowed	confined	allowed	C11	blue1141816	blue	R	2	RL	1st	1	1	0	0
41816	Afternoon	confined - pheromone allowed	confined	allowed	C11	blue1141816	blue	R	3	RL	1st	1	1	0	0
41816	Afternoon	confined - pheromone allowed	confined	allowed	C11	blue1141816	blue	R	4	RL	1st	1	1	1	0
41816	Afternoon	confined - pheromone allowed	confined	allowed	C11	blue1141816	blue	R	5	RL	1st	1	1	0	0
41816	Afternoon	confined - pheromone allowed	confined	allowed	C11	blue1141816	blue	R	6	RL	1st	1	1	0	0
41816	Afternoon	confined - pheromone allowed	confined	allowed	C11	blue1141816	blue	R	7	R*L	1st	1	1	0		1
41816	Afternoon	confined - pheromone allowed	confined	allowed	C11	yellow1141816	yellow	R	0		1st				0
41816	Afternoon	confined - pheromone allowed	confined	allowed	C11	yellow1141816	yellow	R	1	RL	1st	1	1	2	1
41816	Afternoon	confined - pheromone allowed	confined	allowed	C11	yellow1141816	yellow	R	2	RL	1st	1	1	0	1
41816	Afternoon	confined - pheromone allowed	confined	allowed	C11	yellow1141816	yellow	R	3	RL	1st	1	1	0
41816	Afternoon	confined - pheromone allowed	confined	allowed	C11	yellow1141816	yellow	R	4	RL	1st	1	1	1	0
41816	Afternoon	confined - pheromone allowed	confined	allowed	C11	yellow1141816	yellow	R	5	RL	1st	1	1	0	0
41816	Afternoon	confined - pheromone allowed	confined	allowed	C11	yellow1141816	yellow	R	6	RL	1st	1	1	0
41816	Afternoon	confined - pheromone allowed	confined	allowed	C11	yellow1141816	yellow	R	7	RL	1st	1	1	0
41816	Afternoon	confined - pheromone allowed	confined	allowed	C11	green1141816	green	R	0	RL	1st				3
41816	Afternoon	confined - pheromone allowed	confined	allowed	C11	green1141816	green	R	1	RL	1st	1	1	3	2
41816	Afternoon	confined - pheromone allowed	confined	allowed	C11	green1141816	green	R	2	RL	1st	1	1	1	2
41816	Afternoon	confined - pheromone allowed	confined	allowed	C11	green1141816	green	R	3	RL	1st	1	1	1
41816	Afternoon	confined - pheromone allowed	confined	allowed	C11	green1141816	green	R	4	RL	1st	1	1	1	0
41816	Afternoon	confined - pheromone allowed	confined	allowed	C11	green1141816	green	R	5	RL	1st	1	1	1	0
41816	Afternoon	confined - pheromone allowed	confined	allowed	C11	green1141816	green	R	6	RL	1st	1	1		1
41816	Afternoon	confined - pheromone allowed	confined	allowed	C11	green1141816	green	R	7	RL	1st	1	1	0
41816	Afternoon	confined - pheromone allowed	confined	allowed	C11	red1141816	red	R	0		1st
41816	Afternoon	confined - pheromone allowed	confined	allowed	C11	red1141816	red	R	1	RL	1st	1	1	1
41816	Afternoon	confined - pheromone allowed	confined	allowed	C11	red1141816	red	R	2	RL	1st	1	1	0	1
41816	Afternoon	confined - pheromone allowed	confined	allowed	C11	red1141816	red	R	3	RL	1st	1	1	0	1
41816	Afternoon	confined - pheromone allowed	confined	allowed	C11	red1141816	red	R	4	RL	1st	1	1	1	3
41816	Afternoon	confined - pheromone allowed	confined	allowed	C11	red1141816	red	R	5	RL	1st	1	1	1
41816	Afternoon	confined - pheromone allowed	confined	allowed	C11	red1141816	red	R	6		1st
41816	Afternoon	confined - pheromone allowed	confined	allowed	C11	red1141816	red	R	7		1st
41816	Afternoon	confined - pheromone allowed	confined	allowed	C11	orange1141816	orange	R	0		1st				4
41816	Afternoon	confined - pheromone allowed	confined	allowed	C11	orange1141816	orange	R	1	RL	1st	1	1	3	2
41816	Afternoon	confined - pheromone allowed	confined	allowed	C11	orange1141816	orange	R	2	RL	1st	1	1	0	1
41816	Afternoon	confined - pheromone allowed	confined	allowed	C11	orange1141816	orange	R	3	RL	1st	1	1	1	0
41816	Afternoon	confined - pheromone allowed	confined	allowed	C11	orange1141816	orange	R	4	RL	1st	1	1	0	0
41816	Afternoon	confined - pheromone allowed	confined	allowed	C11	orange1141816	orange	R	5	RL	1st	1	1	1	1
41816	Afternoon	confined - pheromone allowed	confined	allowed	C11	orange1141816	orange	R	6	RL	1st	1	1	0	1
41816	Afternoon	confined - pheromone allowed	confined	allowed	C11	orange1141816	orange	R	7	LL	1st	0	0	0
41835	Morning	open - pheromone allowed	open	allowed	C888	gold88841835	gold	R	0		1st
41835	Morning	open - pheromone allowed	open	allowed	C888	gold88841835	gold	R	1	RR	1st	1	1	0	1
41835	Morning	open - pheromone allowed	open	allowed	C888	gold88841835	gold	R	2	RL	1st	1	1	0	0
41835	Morning	open - pheromone allowed	open	allowed	C888	gold88841835	gold	R	3	RL	1st	1	1	0	0
41835	Morning	open - pheromone allowed	open	allowed	C888	gold88841835	gold	R	4	RL	1st	1	1	0
41835	Morning	open - pheromone allowed	open	allowed	C888	gold88841835	gold	R	5	L*L	1st	0	0		0	1
41835	Morning	open - pheromone allowed	open	allowed	C888	gold88841835	gold	R	6	RL	1st	1	1	1	0
41835	Morning	open - pheromone allowed	open	allowed	C888	gold88841835	gold	R	7	RL	1st	1	1
41835	Morning	open - pheromone allowed	open	allowed	C888	yellow88841835	yellow	R	0		1st				3
41835	Morning	open - pheromone allowed	open	allowed	C888	yellow88841835	yellow	R	1	L*L	1st	0	0	0	5	1
41835	Morning	open - pheromone allowed	open	allowed	C888	yellow88841835	yellow	R	2	RL	1st	1	1	0	0
41835	Morning	open - pheromone allowed	open	allowed	C888	yellow88841835	yellow	R	3	L*L	1st	0	0	0	1	1
41835	Morning	open - pheromone allowed	open	allowed	C888	yellow88841835	yellow	R	4	RL	1st	1	1	0	0
41835	Morning	open - pheromone allowed	open	allowed	C888	yellow88841835	yellow	R	5	RL	1st	1	1	0	0
41835	Morning	open - pheromone allowed	open	allowed	C888	yellow88841835	yellow	R	6	RL	1st	1	1	2	1
41835	Morning	open - pheromone allowed	open	allowed	C888	yellow88841835	yellow	R	7	RR	1st	1	1	0
41835	Morning	open - pheromone allowed	open	allowed	C888	green88841835	green	R	0		1st
41835	Morning	open - pheromone allowed	open	allowed	C888	green88841835	green	R	1	LR	1st	0	0	0
41835	Morning	open - pheromone allowed	open	allowed	C888	green88841835	green	R	2	L*L	1st	0	0		1	1
41835	Morning	open - pheromone allowed	open	allowed	C888	green88841835	green	R	3	RL	1st	1	1	0
41835	Morning	open - pheromone allowed	open	allowed	C888	green88841835	green	R	4	RL	1st	1	1	0	0
41835	Morning	open - pheromone allowed	open	allowed	C888	green88841835	green	R	5	RL	1st	1	1	0	1
41835	Morning	open - pheromone allowed	open	allowed	C888	green88841835	green	R	6	RL	1st	1	1		2
41835	Morning	open - pheromone allowed	open	allowed	C888	green88841835	green	R	7	RL	1st	1	1	0
41835	Morning	open - pheromone allowed	open	allowed	C888	red88841835	red	R	0		1st				0
41835	Morning	open - pheromone allowed	open	allowed	C888	red88841835	red	R	1	RR	1st	1	1	0	3
41835	Morning	open - pheromone allowed	open	allowed	C888	red88841835	red	R	2	L*L	1st	0	0	0	1	1
41835	Morning	open - pheromone allowed	open	allowed	C888	red88841835	red	R	3	RL	1st	1	1	0	0
41835	Morning	open - pheromone allowed	open	allowed	C888	red88841835	red	R	4	RL	1st	1	1	0	1
41835	Morning	open - pheromone allowed	open	allowed	C888	red88841835	red	R	5	RL	1st	1	1		0
41835	Morning	open - pheromone allowed	open	allowed	C888	red88841835	red	R	6	L*L	1st	0	0	0	1	1
41835	Morning	open - pheromone allowed	open	allowed	C888	red88841835	red	R	7	L*R	1st	0	0	0		1
41835	Morning	open - pheromone allowed	open	allowed	C888	orange88841835	orange	R	0		1st
41835	Morning	open - pheromone allowed	open	allowed	C888	orange88841835	orange	R	1	RR	1st	1	1	0	2
41835	Morning	open - pheromone allowed	open	allowed	C888	orange88841835	orange	R	2	RL	1st	1	1		2
41835	Morning	open - pheromone allowed	open	allowed	C888	orange88841835	orange	R	3	RL	1st	1	1	0	0
41835	Morning	open - pheromone allowed	open	allowed	C888	orange88841835	orange	R	4	RL	1st	1	1	1
41835	Morning	open - pheromone allowed	open	allowed	C888	orange88841835	orange	R	5		1st
41835	Morning	open - pheromone allowed	open	allowed	C888	orange88841835	orange	R	6		1st
41835	Morning	open - pheromone allowed	open	allowed	C888	orange88841835	orange	R	7		1st
41835	Morning	open - pheromone allowed	open	allowed	CRGB8	goldRGB841835	gold	R	0		1st				0
41835	Morning	open - pheromone allowed	open	allowed	CRGB8	goldRGB841835	gold	R	1	RR	1st	1	1	0	0
41835	Morning	open - pheromone allowed	open	allowed	CRGB8	goldRGB841835	gold	R	2	RR	1st	1	1	0	0
41835	Morning	open - pheromone allowed	open	allowed	CRGB8	goldRGB841835	gold	R	3	RL	1st	1	1	0	0
41835	Morning	open - pheromone allowed	open	allowed	CRGB8	goldRGB841835	gold	R	4	RR	1st	1	1	0
41835	Morning	open - pheromone allowed	open	allowed	CRGB8	goldRGB841835	gold	R	5	RR	1st	1	1	0	0
41835	Morning	open - pheromone allowed	open	allowed	CRGB8	goldRGB841835	gold	R	6	RL	1st	1	1	0
41835	Morning	open - pheromone allowed	open	allowed	CRGB8	goldRGB841835	gold	R	7	L*L	1st	0	0	0		1
41835	Morning	open - pheromone allowed	open	allowed	CRGB8	yellowRGB841835	yellow	R	0		1st
41835	Morning	open - pheromone allowed	open	allowed	CRGB8	yellowRGB841835	yellow	R	1		1st
41835	Morning	open - pheromone allowed	open	allowed	CRGB8	yellowRGB841835	yellow	R	2		1st
41835	Morning	open - pheromone allowed	open	allowed	CRGB8	yellowRGB841835	yellow	R	3		1st
41835	Morning	open - pheromone allowed	open	allowed	CRGB8	yellowRGB841835	yellow	R	4		1st
41835	Morning	open - pheromone allowed	open	allowed	CRGB8	yellowRGB841835	yellow	R	5		1st
41835	Morning	open - pheromone allowed	open	allowed	CRGB8	yellowRGB841835	yellow	R	6		1st
41835	Morning	open - pheromone allowed	open	allowed	CRGB8	yellowRGB841835	yellow	R	7		1st
41835	Morning	open - pheromone allowed	open	allowed	CRGB8	greenRGB841835	green	R	0		1st				1
41835	Morning	open - pheromone allowed	open	allowed	CRGB8	greenRGB841835	green	R	1	LR	1st	0	0	0	9
41835	Morning	open - pheromone allowed	open	allowed	CRGB8	greenRGB841835	green	R	2	LR	1st	0	0	0	5
41835	Morning	open - pheromone allowed	open	allowed	CRGB8	greenRGB841835	green	R	3	RR	1st	1	1	0
41835	Morning	open - pheromone allowed	open	allowed	CRGB8	greenRGB841835	green	R	4	RL	1st	1	1	1
41835	Morning	open - pheromone allowed	open	allowed	CRGB8	greenRGB841835	green	R	5	LL	1st	0	0	0	1
41835	Morning	open - pheromone allowed	open	allowed	CRGB8	greenRGB841835	green	R	6	RR	1st	1	1	0	1
41835	Morning	open - pheromone allowed	open	allowed	CRGB8	greenRGB841835	green	R	7	LL	1st	0	0	0
41835	Morning	open - pheromone allowed	open	allowed	CRGB8	redRGB841835	red	R	0		1st				1
41835	Morning	open - pheromone allowed	open	allowed	CRGB8	redRGB841835	red	R	1	L*R	1st	0	0	0	0	1
41835	Morning	open - pheromone allowed	open	allowed	CRGB8	redRGB841835	red	R	2	RL	1st	1	1	0	0
41835	Morning	open - pheromone allowed	open	allowed	CRGB8	redRGB841835	red	R	3	L*L	1st	0	0	0	0	1
41835	Morning	open - pheromone allowed	open	allowed	CRGB8	redRGB841835	red	R	4	L*L	1st	0	0	0	0	1
41835	Morning	open - pheromone allowed	open	allowed	CRGB8	redRGB841835	red	R	5	RL	1st	1	1	0	0
41835	Morning	open - pheromone allowed	open	allowed	CRGB8	redRGB841835	red	R	6	RL	1st	1	1		0
41835	Morning	open - pheromone allowed	open	allowed	CRGB8	redRGB841835	red	R	7	RL	1st	1	1	0
41835	Morning	open - pheromone allowed	open	allowed	CRGB8	orangeRGB841835	orange	R	0		1st
41835	Morning	open - pheromone allowed	open	allowed	CRGB8	orangeRGB841835	orange	R	1	RL	1st	1	1	0	1
41835	Morning	open - pheromone allowed	open	allowed	CRGB8	orangeRGB841835	orange	R	2	RL	1st	1	1	0	0
41835	Morning	open - pheromone allowed	open	allowed	CRGB8	orangeRGB841835	orange	R	3	LL	1st	0	0	0	0
41835	Morning	open - pheromone allowed	open	allowed	CRGB8	orangeRGB841835	orange	R	4	LR	1st	0	0	0
41835	Morning	open - pheromone allowed	open	allowed	CRGB8	orangeRGB841835	orange	R	5	RR	1st	1	1	0	0
41835	Morning	open - pheromone allowed	open	allowed	CRGB8	orangeRGB841835	orange	R	6	RL	1st	1	1	1	1
41835	Morning	open - pheromone allowed	open	allowed	CRGB8	orangeRGB841835	orange	R	7	RL	1st	1	1	0
41836	Morning	open - pheromone allowed	open	allowed	CRGB8	goldRGB841836	gold	L	0		1st
41836	Morning	open - pheromone allowed	open	allowed	CRGB8	goldRGB841836	gold	L	1	RR	1st	0	0	0	3
41836	Morning	open - pheromone allowed	open	allowed	CRGB8	goldRGB841836	gold	L	2	LR	1st	1	1	0	1
41836	Morning	open - pheromone allowed	open	allowed	CRGB8	goldRGB841836	gold	L	3	R*L	1st	0	0		1	1
41836	Morning	open - pheromone allowed	open	allowed	CRGB8	goldRGB841836	gold	L	4	LR	1st	1	1	0
41836	Morning	open - pheromone allowed	open	allowed	CRGB8	goldRGB841836	gold	L	5	LR	1st	1	1	0	0
41836	Morning	open - pheromone allowed	open	allowed	CRGB8	goldRGB841836	gold	L	6	R*R	1st	0	0	0	0	1
41836	Morning	open - pheromone allowed	open	allowed	CRGB8	goldRGB841836	gold	L	7	R*R	1st	0	0	0		1
41836	Morning	open - pheromone allowed	open	allowed	CRGB8	yellowRGB841836	yellow	L	0		1st				0
41836	Morning	open - pheromone allowed	open	allowed	CRGB8	yellowRGB841836	yellow	L	1	LR	1st	1	1	0	0
41836	Morning	open - pheromone allowed	open	allowed	CRGB8	yellowRGB841836	yellow	L	2	LL	1st	1	1	0	0
41836	Morning	open - pheromone allowed	open	allowed	CRGB8	yellowRGB841836	yellow	L	3	LR	1st	1	1	0	0
41836	Morning	open - pheromone allowed	open	allowed	CRGB8	yellowRGB841836	yellow	L	4	LR	1st	1	1	0	0
41836	Morning	open - pheromone allowed	open	allowed	CRGB8	yellowRGB841836	yellow	L	5	LR	1st	1	1	0	1
41836	Morning	open - pheromone allowed	open	allowed	CRGB8	yellowRGB841836	yellow	L	6	LR	1st	1	1	0	1
41836	Morning	open - pheromone allowed	open	allowed	CRGB8	yellowRGB841836	yellow	L	7	LL	1st	1	1	0
41836	Morning	open - pheromone allowed	open	allowed	CRGB8	greenRGB841836	green	L	0		1st
41836	Morning	open - pheromone allowed	open	allowed	CRGB8	greenRGB841836	green	L	1	LR	1st	1	1	1	1
41836	Morning	open - pheromone allowed	open	allowed	CRGB8	greenRGB841836	green	L	2	R*R	1st	0	0	0	0	1
41836	Morning	open - pheromone allowed	open	allowed	CRGB8	greenRGB841836	green	L	3	LL	1st	1	1	0	0
41836	Morning	open - pheromone allowed	open	allowed	CRGB8	greenRGB841836	green	L	4	LL	1st	1	1	2	0
41836	Morning	open - pheromone allowed	open	allowed	CRGB8	greenRGB841836	green	L	5	LL	1st	1	1	0	0
41836	Morning	open - pheromone allowed	open	allowed	CRGB8	greenRGB841836	green	L	6	LL	1st	1	1	0	0
41836	Morning	open - pheromone allowed	open	allowed	CRGB8	greenRGB841836	green	L	7	LR	1st	1	1	0
41836	Morning	open - pheromone allowed	open	allowed	CRGB8	redRGB841836	red	L	0		1st
41836	Morning	open - pheromone allowed	open	allowed	CRGB8	redRGB841836	red	L	1	LR	1st	1	1	3	0
41836	Morning	open - pheromone allowed	open	allowed	CRGB8	redRGB841836	red	L	2	LR	1st	1	1	1	0
41836	Morning	open - pheromone allowed	open	allowed	CRGB8	redRGB841836	red	L	3	LR	1st	1	1	0	1
41836	Morning	open - pheromone allowed	open	allowed	CRGB8	redRGB841836	red	L	4	LR	1st	1	1	0
41836	Morning	open - pheromone allowed	open	allowed	CRGB8	redRGB841836	red	L	5	LR	1st	1	1	1	0
41836	Morning	open - pheromone allowed	open	allowed	CRGB8	redRGB841836	red	L	6	LR	1st	1	1	0	0
41836	Morning	open - pheromone allowed	open	allowed	CRGB8	redRGB841836	red	L	7	R*R	1st	0	0	1		1
41836	Morning	open - pheromone allowed	open	allowed	CRGB8	orangeRGB841836	orange	L	0		1st
41836	Morning	open - pheromone allowed	open	allowed	CRGB8	orangeRGB841836	orange	L	1	LL	1st	1	1	0	3
41836	Morning	open - pheromone allowed	open	allowed	CRGB8	orangeRGB841836	orange	L	2	LR	1st	1	1	0	1
41836	Morning	open - pheromone allowed	open	allowed	CRGB8	orangeRGB841836	orange	L	3	LR	1st	1	1		1
41836	Morning	open - pheromone allowed	open	allowed	CRGB8	orangeRGB841836	orange	L	4	LR	1st	1	1	0
41836	Morning	open - pheromone allowed	open	allowed	CRGB8	orangeRGB841836	orange	L	5	LR	1st	1	1	0	0
41836	Morning	open - pheromone allowed	open	allowed	CRGB8	orangeRGB841836	orange	L	6	LR	1st	1	1	0	0
41836	Morning	open - pheromone allowed	open	allowed	CRGB8	orangeRGB841836	orange	L	7	LR	1st	1	1	0
41836	Morning	open - pheromone allowed	open	allowed	C888split	gold888split41836	gold	R	0		1st
41836	Morning	open - pheromone allowed	open	allowed	C888split	gold888split41836	gold	R	1	RR	1st	1	1	0	4
41836	Morning	open - pheromone allowed	open	allowed	C888split	gold888split41836	gold	R	2	RL	1st	1	1	0
41836	Morning	open - pheromone allowed	open	allowed	C888split	gold888split41836	gold	R	3	RL	1st	1	1	0	0
41836	Morning	open - pheromone allowed	open	allowed	C888split	gold888split41836	gold	R	4	RL	1st	1	1	0	1
41836	Morning	open - pheromone allowed	open	allowed	C888split	gold888split41836	gold	R	5	RL	1st	1	1	1	0
41836	Morning	open - pheromone allowed	open	allowed	C888split	gold888split41836	gold	R	6	RL	1st	1	1	0	0
41836	Morning	open - pheromone allowed	open	allowed	C888split	gold888split41836	gold	R	7	RR	1st	1	1	2
41836	Morning	open - pheromone allowed	open	allowed	C888split	yellow888split41836	yellow	R	0		1st
41836	Morning	open - pheromone allowed	open	allowed	C888split	yellow888split41836	yellow	R	1	RR	1st	1	1	0	2
41836	Morning	open - pheromone allowed	open	allowed	C888split	yellow888split41836	yellow	R	2	L*R	1st	0	0	0	0	1
41836	Morning	open - pheromone allowed	open	allowed	C888split	yellow888split41836	yellow	R	3	RR	1st	1	1	0
41836	Morning	open - pheromone allowed	open	allowed	C888split	yellow888split41836	yellow	R	4	RL	1st	1	1	0	0
41836	Morning	open - pheromone allowed	open	allowed	C888split	yellow888split41836	yellow	R	5	RL	1st	1	1	0	0
41836	Morning	open - pheromone allowed	open	allowed	C888split	yellow888split41836	yellow	R	6	RL	1st	1	1	0	0
41836	Morning	open - pheromone allowed	open	allowed	C888split	yellow888split41836	yellow	R	7	RL	1st	1	1	0
41836	Morning	open - pheromone allowed	open	allowed	C888split	green888split41836	green	R	0		1st				2
41836	Morning	open - pheromone allowed	open	allowed	C888split	green888split41836	green	R	1	RL	1st	1	1	1	0
41836	Morning	open - pheromone allowed	open	allowed	C888split	green888split41836	green	R	2	LL	1st	0	0	0
41836	Morning	open - pheromone allowed	open	allowed	C888split	green888split41836	green	R	3		1st
41836	Morning	open - pheromone allowed	open	allowed	C888split	green888split41836	green	R	4		1st
41836	Morning	open - pheromone allowed	open	allowed	C888split	green888split41836	green	R	5		1st
41836	Morning	open - pheromone allowed	open	allowed	C888split	green888split41836	green	R	6		1st
41836	Morning	open - pheromone allowed	open	allowed	C888split	green888split41836	green	R	7		1st
41836	Morning	open - pheromone allowed	open	allowed	C888split	red888split41836	red	R	0		1st
41836	Morning	open - pheromone allowed	open	allowed	C888split	red888split41836	red	R	1	RR	1st	1	1	0	0
41836	Morning	open - pheromone allowed	open	allowed	C888split	red888split41836	red	R	2	LR	1st	0	0	0	0
41836	Morning	open - pheromone allowed	open	allowed	C888split	red888split41836	red	R	3	RL	1st	1	1	0	0
41836	Morning	open - pheromone allowed	open	allowed	C888split	red888split41836	red	R	4	RR	1st	1	1	0	0
41836	Morning	open - pheromone allowed	open	allowed	C888split	red888split41836	red	R	5	RL	1st	1	1	0	0
41836	Morning	open - pheromone allowed	open	allowed	C888split	red888split41836	red	R	6	RL	1st	1	1	0
41836	Morning	open - pheromone allowed	open	allowed	C888split	red888split41836	red	R	7	L*L	1st	0	0	0		1
41836	Morning	open - pheromone allowed	open	allowed	C888split	orange888split41836	orange	R	0		1st				0
41836	Morning	open - pheromone allowed	open	allowed	C888split	orange888split41836	orange	R	1	LL	1st	0	0	0	0
41836	Morning	open - pheromone allowed	open	allowed	C888split	orange888split41836	orange	R	2	R*L	1st	1	1	0	0	1
41836	Morning	open - pheromone allowed	open	allowed	C888split	orange888split41836	orange	R	3	RR	1st	1	1	0	3
41836	Morning	open - pheromone allowed	open	allowed	C888split	orange888split41836	orange	R	4	RL	1st	1	1	0	0
41836	Morning	open - pheromone allowed	open	allowed	C888split	orange888split41836	orange	R	5	RL	1st	1	1	0	0
41836	Morning	open - pheromone allowed	open	allowed	C888split	orange888split41836	orange	R	6	RL	1st	1	1	0	1
41836	Morning	open - pheromone allowed	open	allowed	C888split	orange888split41836	orange	R	7	RR	1st	1	1	0
41837	Morning	open - pheromone allowed	open	allowed	C12	gold1241837	gold	R	0		1st				0
41837	Morning	open - pheromone allowed	open	allowed	C12	gold1241837	gold	R	1	LL	1st	0	0	4	2
41837	Morning	open - pheromone allowed	open	allowed	C12	gold1241837	gold	R	2	L*L	1st	0	0	0		1
41837	Morning	open - pheromone allowed	open	allowed	C12	gold1241837	gold	R	3	RL	1st	1	1		2
41837	Morning	open - pheromone allowed	open	allowed	C12	gold1241837	gold	R	4	L*L	1st	0	0	0	1	1
41837	Morning	open - pheromone allowed	open	allowed	C12	gold1241837	gold	R	5	RL	1st	1	1	0
41837	Morning	open - pheromone allowed	open	allowed	C12	gold1241837	gold	R	6	RL	1st	1	1	1	0
41837	Morning	open - pheromone allowed	open	allowed	C12	gold1241837	gold	R	7	L*R	1st	0	0	0		1
41837	Morning	open - pheromone allowed	open	allowed	C12	yellow1241837	yellow	R	0		1st
41837	Morning	open - pheromone allowed	open	allowed	C12	yellow1241837	yellow	R	1	LL	1st	0	0	0
41837	Morning	open - pheromone allowed	open	allowed	C12	yellow1241837	yellow	R	2	LL	1st	0	0	1	2
41837	Morning	open - pheromone allowed	open	allowed	C12	yellow1241837	yellow	R	3	LR	1st	0	0	0	2
41837	Morning	open - pheromone allowed	open	allowed	C12	yellow1241837	yellow	R	4	RL	1st	1	1		0
41837	Morning	open - pheromone allowed	open	allowed	C12	yellow1241837	yellow	R	5	RL	1st	1	1	0	0
41837	Morning	open - pheromone allowed	open	allowed	C12	yellow1241837	yellow	R	6	RL	1st	1	1	1	0
41837	Morning	open - pheromone allowed	open	allowed	C12	yellow1241837	yellow	R	7	RL	1st	1	1	2
41837	Morning	open - pheromone allowed	open	allowed	C12	green1241837	green	R	0		1st				0
41837	Morning	open - pheromone allowed	open	allowed	C12	green1241837	green	R	1	LR	1st	0	0		2
41837	Morning	open - pheromone allowed	open	allowed	C12	green1241837	green	R	2	RL	1st	1	1	0
41837	Morning	open - pheromone allowed	open	allowed	C12	green1241837	green	R	3	RL	1st	1	1	0	1
41837	Morning	open - pheromone allowed	open	allowed	C12	green1241837	green	R	4	RL	1st	1	1	0
41837	Morning	open - pheromone allowed	open	allowed	C12	green1241837	green	R	5	RL	1st	1	1	0	0
41837	Morning	open - pheromone allowed	open	allowed	C12	green1241837	green	R	6	RL	1st	1	1	0	0
41837	Morning	open - pheromone allowed	open	allowed	C12	green1241837	green	R	7	RR	1st	1	1	0
41837	Morning	open - pheromone allowed	open	allowed	C12	red1241837	red	R	0		1st				0
41837	Morning	open - pheromone allowed	open	allowed	C12	red1241837	red	R	1	R*R	1st	1	1	0	0	1
41837	Morning	open - pheromone allowed	open	allowed	C12	red1241837	red	R	2	RL	1st	1	1	1	1
41837	Morning	open - pheromone allowed	open	allowed	C12	red1241837	red	R	3	RL	1st	1	1	1	1
41837	Morning	open - pheromone allowed	open	allowed	C12	red1241837	red	R	4	LR	1st	0	0	1	2
41837	Morning	open - pheromone allowed	open	allowed	C12	red1241837	red	R	5	RL	1st	1	1	0	0
41837	Morning	open - pheromone allowed	open	allowed	C12	red1241837	red	R	6	RL	1st	1	1	0	0
41837	Morning	open - pheromone allowed	open	allowed	C12	red1241837	red	R	7	RL	1st	1	1	0
41837	Morning	open - pheromone allowed	open	allowed	C12	orange1241837	orange	R	0		1st				1
41837	Morning	open - pheromone allowed	open	allowed	C12	orange1241837	orange	R	1	RL	1st	1	1	3	1
41837	Morning	open - pheromone allowed	open	allowed	C12	orange1241837	orange	R	2	RL	1st	1	1	0	1
41837	Morning	open - pheromone allowed	open	allowed	C12	orange1241837	orange	R	3	L*L	1st	0	0	0	1	1
41837	Morning	open - pheromone allowed	open	allowed	C12	orange1241837	orange	R	4	RL	1st	1	1	1	1
41837	Morning	open - pheromone allowed	open	allowed	C12	orange1241837	orange	R	5	RL	1st	1	1	0	0
41837	Morning	open - pheromone allowed	open	allowed	C12	orange1241837	orange	R	6	L*L	1st	0	0	0	0	1
41837	Morning	open - pheromone allowed	open	allowed	C12	orange1241837	orange	R	7	RL	1st	1	1	2
41837	Morning	open - pheromone allowed	open	allowed	C3	gold341837	gold	L	0		1st				0
41837	Morning	open - pheromone allowed	open	allowed	C3	gold341837	gold	L	1	LL	1st	1	1	0	1
41837	Morning	open - pheromone allowed	open	allowed	C3	gold341837	gold	L	2	LR	1st	1	1	0	1
41837	Morning	open - pheromone allowed	open	allowed	C3	gold341837	gold	L	3	LR	1st	1	1	0	0
41837	Morning	open - pheromone allowed	open	allowed	C3	gold341837	gold	L	4	LL	1st	1	1	0	2
41837	Morning	open - pheromone allowed	open	allowed	C3	gold341837	gold	L	5	LR	1st	1	1	0	0
41837	Morning	open - pheromone allowed	open	allowed	C3	gold341837	gold	L	6	LR	1st	1	1	0	0
41837	Morning	open - pheromone allowed	open	allowed	C3	gold341837	gold	L	7	R*R	1st	0	0	0		1
41837	Morning	open - pheromone allowed	open	allowed	C3	yellow341837	yellow	L	0		1st				0
41837	Morning	open - pheromone allowed	open	allowed	C3	yellow341837	yellow	L	1	LR	1st	1	1	0	2
41837	Morning	open - pheromone allowed	open	allowed	C3	yellow341837	yellow	L	2	LR	1st	1	1	2	1
41837	Morning	open - pheromone allowed	open	allowed	C3	yellow341837	yellow	L	3	LR	1st	1	1	0	3
41837	Morning	open - pheromone allowed	open	allowed	C3	yellow341837	yellow	L	4	LR	1st	1	1	0	1
41837	Morning	open - pheromone allowed	open	allowed	C3	yellow341837	yellow	L	5	LR	1st	1	1	2	0
41837	Morning	open - pheromone allowed	open	allowed	C3	yellow341837	yellow	L	6		1st			0	2
41837	Morning	open - pheromone allowed	open	allowed	C3	yellow341837	yellow	L	7	RL	1st	0	0	0
41837	Morning	open - pheromone allowed	open	allowed	C3	green341837	green	L	0		1st
41837	Morning	open - pheromone allowed	open	allowed	C3	green341837	green	L	1	R*R	1st	0	0	3	2	1
41837	Morning	open - pheromone allowed	open	allowed	C3	green341837	green	L	2	LR	1st	1	1	0	2
41837	Morning	open - pheromone allowed	open	allowed	C3	green341837	green	L	3	LR	1st	1	1	0	2
41837	Morning	open - pheromone allowed	open	allowed	C3	green341837	green	L	4	LL	1st	1	1		1
41837	Morning	open - pheromone allowed	open	allowed	C3	green341837	green	L	5	LR	1st	1	1	0	2
41837	Morning	open - pheromone allowed	open	allowed	C3	green341837	green	L	6	LR	1st	1	1	0	1
41837	Morning	open - pheromone allowed	open	allowed	C3	green341837	green	L	7	RR	1st	0	0	0
41837	Morning	open - pheromone allowed	open	allowed	C3	red341837	red	L	0		1st
41837	Morning	open - pheromone allowed	open	allowed	C3	red341837	red	L	1	LR	1st	1	1	0	2
41837	Morning	open - pheromone allowed	open	allowed	C3	red341837	red	L	2	LR	1st	1	1	0	1
41837	Morning	open - pheromone allowed	open	allowed	C3	red341837	red	L	3	LL	1st	1	1	0	3
41837	Morning	open - pheromone allowed	open	allowed	C3	red341837	red	L	4	LR	1st	1	1	0	1
41837	Morning	open - pheromone allowed	open	allowed	C3	red341837	red	L	5	LR	1st	1	1	0	2
41837	Morning	open - pheromone allowed	open	allowed	C3	red341837	red	L	6	RL	1st	0	0	0	2
41837	Morning	open - pheromone allowed	open	allowed	C3	red341837	red	L	7	R*L	1st	0	0	0		1
41837	Morning	open - pheromone allowed	open	allowed	C3	orange341837	orange	L	0		1st				0
41837	Morning	open - pheromone allowed	open	allowed	C3	orange341837	orange	L	1	LL	1st	1	1	0	1
41837	Morning	open - pheromone allowed	open	allowed	C3	orange341837	orange	L	2	LR	1st	1	1	0	1
41837	Morning	open - pheromone allowed	open	allowed	C3	orange341837	orange	L	3	LR	1st	1	1	0	0
41837	Morning	open - pheromone allowed	open	allowed	C3	orange341837	orange	L	4	RR	1st	0	0	0	2
41837	Morning	open - pheromone allowed	open	allowed	C3	orange341837	orange	L	5	LR	1st	1	1	0	0
41837	Morning	open - pheromone allowed	open	allowed	C3	orange341837	orange	L	6	LR	1st	1	1	0	0
41837	Morning	open - pheromone allowed	open	allowed	C3	orange341837	orange	L	7	LL	1st	1	1	0
41838	Morning	open - pheromone allowed	open	allowed	C6	gold641838	gold	L	0		1st
41838	Morning	open - pheromone allowed	open	allowed	C6	gold641838	gold	L	1	LL	1st	1	1	3	1
41838	Morning	open - pheromone allowed	open	allowed	C6	gold641838	gold	L	2	LR	1st	1	1	3	2
41838	Morning	open - pheromone allowed	open	allowed	C6	gold641838	gold	L	3	LR	1st	1	1	2	0
41838	Morning	open - pheromone allowed	open	allowed	C6	gold641838	gold	L	4	LR	1st	1	1	2	3
41838	Morning	open - pheromone allowed	open	allowed	C6	gold641838	gold	L	5	LR	1st	1	1	0	0
41838	Morning	open - pheromone allowed	open	allowed	C6	gold641838	gold	L	6	LR	1st	1	1	0	0
41838	Morning	open - pheromone allowed	open	allowed	C6	gold641838	gold	L	7	RR	1st	0	0	0
41838	Morning	open - pheromone allowed	open	allowed	C6	yellow641838	yellow	L	0		1st				1
41838	Morning	open - pheromone allowed	open	allowed	C6	yellow641838	yellow	L	1	LL	1st	1	1	0	3
41838	Morning	open - pheromone allowed	open	allowed	C6	yellow641838	yellow	L	2	LL	1st	1	1	0	1
41838	Morning	open - pheromone allowed	open	allowed	C6	yellow641838	yellow	L	3	LR	1st	1	1	0	0
41838	Morning	open - pheromone allowed	open	allowed	C6	yellow641838	yellow	L	4	LR	1st	1	1	0	0
41838	Morning	open - pheromone allowed	open	allowed	C6	yellow641838	yellow	L	5	LR	1st	1	1	0	1
41838	Morning	open - pheromone allowed	open	allowed	C6	yellow641838	yellow	L	6	LR	1st	1	1	0	0
41838	Morning	open - pheromone allowed	open	allowed	C6	yellow641838	yellow	L	7	LR	1st	1	1	0
41838	Morning	open - pheromone allowed	open	allowed	C6	green641838	green	L	0		1st
41838	Morning	open - pheromone allowed	open	allowed	C6	green641838	green	L	1	LL	1st	1	1
41838	Morning	open - pheromone allowed	open	allowed	C6	green641838	green	L	2	LL	1st	1	1	0	0
41838	Morning	open - pheromone allowed	open	allowed	C6	green641838	green	L	3	LR	1st	1	1		1
41838	Morning	open - pheromone allowed	open	allowed	C6	green641838	green	L	4	LR	1st	1	1	0	0
41838	Morning	open - pheromone allowed	open	allowed	C6	green641838	green	L	5	LR	1st	1	1	0	1
41838	Morning	open - pheromone allowed	open	allowed	C6	green641838	green	L	6	LL	1st	1	1	0
41838	Morning	open - pheromone allowed	open	allowed	C6	green641838	green	L	7	LR	1st	1	1	1
41838	Morning	open - pheromone allowed	open	allowed	C6	red641838	red	L	0		1st
41838	Morning	open - pheromone allowed	open	allowed	C6	red641838	red	L	1	LL	1st	1	1	0	2
41838	Morning	open - pheromone allowed	open	allowed	C6	red641838	red	L	2	LR	1st	1	1	3	3
41838	Morning	open - pheromone allowed	open	allowed	C6	red641838	red	L	3	LR	1st	1	1	1	0
41838	Morning	open - pheromone allowed	open	allowed	C6	red641838	red	L	4	LR	1st	1	1	0	0
41838	Morning	open - pheromone allowed	open	allowed	C6	red641838	red	L	5	RR	1st	0	0	0	0
41838	Morning	open - pheromone allowed	open	allowed	C6	red641838	red	L	6	LR	1st	1	1		0
41838	Morning	open - pheromone allowed	open	allowed	C6	red641838	red	L	7	RL	1st	0	0	1
41838	Morning	open - pheromone allowed	open	allowed	C6	orange641838	orange	L	0		1st
41838	Morning	open - pheromone allowed	open	allowed	C6	orange641838	orange	L	1	LR	1st	1	1	0	2
41838	Morning	open - pheromone allowed	open	allowed	C6	orange641838	orange	L	2	LL	1st	1	1	2	0
41838	Morning	open - pheromone allowed	open	allowed	C6	orange641838	orange	L	3	LR	1st	1	1	2
41838	Morning	open - pheromone allowed	open	allowed	C6	orange641838	orange	L	4	LR	1st	1	1	0
41838	Morning	open - pheromone allowed	open	allowed	C6	orange641838	orange	L	5	LR	1st	1	1	3	1
41838	Morning	open - pheromone allowed	open	allowed	C6	orange641838	orange	L	6	LR	1st	1	1	1	3
41838	Morning	open - pheromone allowed	open	allowed	C6	orange641838	orange	L	7	LR	1st	1	1	1
41842	Morning	open - pheromone allowed	open	allowed	C888	gold88841842	gold	L	0		1st				0
41842	Morning	open - pheromone allowed	open	allowed	C888	gold88841842	gold	L	1	RR	1st	0	0	0	4
41842	Morning	open - pheromone allowed	open	allowed	C888	gold88841842	gold	L	2	LR	1st	1	1	1	3
41842	Morning	open - pheromone allowed	open	allowed	C888	gold88841842	gold	L	3	LR	1st	1	1	0	4
41842	Morning	open - pheromone allowed	open	allowed	C888	gold88841842	gold	L	4	R*R	1st	0	0		3	1
41842	Morning	open - pheromone allowed	open	allowed	C888	gold88841842	gold	L	5	R*R	1st	0	0		1	1
41842	Morning	open - pheromone allowed	open	allowed	C888	gold88841842	gold	L	6	LR	1st	1	1		1
41842	Morning	open - pheromone allowed	open	allowed	C888	gold88841842	gold	L	7	RR	1st	0	0	1
41842	Morning	open - pheromone allowed	open	allowed	C888	yellow88841842	yellow	L	0		1st
41842	Morning	open - pheromone allowed	open	allowed	C888	yellow88841842	yellow	L	1	LR	1st	1	1	0
41842	Morning	open - pheromone allowed	open	allowed	C888	yellow88841842	yellow	L	2	LR	1st	1	1	0	0
41842	Morning	open - pheromone allowed	open	allowed	C888	yellow88841842	yellow	L	3	R*R	1st	0	0	0	1	1
41842	Morning	open - pheromone allowed	open	allowed	C888	yellow88841842	yellow	L	4	LR	1st	1	1	0
41842	Morning	open - pheromone allowed	open	allowed	C888	yellow88841842	yellow	L	5	LR	1st	1	1	0
41842	Morning	open - pheromone allowed	open	allowed	C888	yellow88841842	yellow	L	6	LR	1st	1	1	0
41842	Morning	open - pheromone allowed	open	allowed	C888	yellow88841842	yellow	L	7	LR	1st	1	1	0
41842	Morning	open - pheromone allowed	open	allowed	C888	green88841842	green	L	0		1st
41842	Morning	open - pheromone allowed	open	allowed	C888	green88841842	green	L	1		1st
41842	Morning	open - pheromone allowed	open	allowed	C888	green88841842	green	L	2		1st
41842	Morning	open - pheromone allowed	open	allowed	C888	green88841842	green	L	3		1st
41842	Morning	open - pheromone allowed	open	allowed	C888	green88841842	green	L	4		1st
41842	Morning	open - pheromone allowed	open	allowed	C888	green88841842	green	L	5		1st
41842	Morning	open - pheromone allowed	open	allowed	C888	green88841842	green	L	6		1st
41842	Morning	open - pheromone allowed	open	allowed	C888	green88841842	green	L	7		1st
41842	Morning	open - pheromone allowed	open	allowed	C888	red88841842	red	L	0		1st
41842	Morning	open - pheromone allowed	open	allowed	C888	red88841842	red	L	1	L*L	1st	1	1	0		1
41842	Morning	open - pheromone allowed	open	allowed	C888	red88841842	red	L	2	LR	1st	1	1
41842	Morning	open - pheromone allowed	open	allowed	C888	red88841842	red	L	3	LR	1st	1	1	0	0
41842	Morning	open - pheromone allowed	open	allowed	C888	red88841842	red	L	4		1st				0
41842	Morning	open - pheromone allowed	open	allowed	C888	red88841842	red	L	5		1st
41842	Morning	open - pheromone allowed	open	allowed	C888	red88841842	red	L	6		1st
41842	Morning	open - pheromone allowed	open	allowed	C888	red88841842	red	L	7		1st
41842	Morning	open - pheromone allowed	open	allowed	C888	orange88841842	orange	L	0		1st
41842	Morning	open - pheromone allowed	open	allowed	C888	orange88841842	orange	L	1	RR	1st	0	0	0
41842	Morning	open - pheromone allowed	open	allowed	C888	orange88841842	orange	L	2	LR	1st	1	1	4	4
41842	Morning	open - pheromone allowed	open	allowed	C888	orange88841842	orange	L	3	LR	1st	1	1	0	0
41842	Morning	open - pheromone allowed	open	allowed	C888	orange88841842	orange	L	4	R*R	1st	0	0	0	1	1
41842	Morning	open - pheromone allowed	open	allowed	C888	orange88841842	orange	L	5	R*R	1st	0	0			1
41842	Morning	open - pheromone allowed	open	allowed	C888	orange88841842	orange	L	6	LR	1st	1	1	0	0
41842	Morning	open - pheromone allowed	open	allowed	C888	orange88841842	orange	L	7	RR	1st	0	0	0	0
41842	Morning	open - pheromone allowed	open	allowed	C11	gold1141842	gold	R	0		1st
41842	Morning	open - pheromone allowed	open	allowed	C11	gold1141842	gold	R	1	LL	1st	0	0	2	0
41842	Morning	open - pheromone allowed	open	allowed	C11	gold1141842	gold	R	2	LR	1st	0	0	0	1
41842	Morning	open - pheromone allowed	open	allowed	C11	gold1141842	gold	R	3	RL	1st	1	1	0
41842	Morning	open - pheromone allowed	open	allowed	C11	gold1141842	gold	R	4	RL	1st	1	1	0	1
41842	Morning	open - pheromone allowed	open	allowed	C11	gold1141842	gold	R	5	RL	1st	1	1	0	0
41842	Morning	open - pheromone allowed	open	allowed	C11	gold1141842	gold	R	6	RL	1st	1	1	0	0
41842	Morning	open - pheromone allowed	open	allowed	C11	gold1141842	gold	R	7	LL	1st	0	0	0
41842	Morning	open - pheromone allowed	open	allowed	C11	yellow1141842	yellow	R	0		1st
41842	Morning	open - pheromone allowed	open	allowed	C11	yellow1141842	yellow	R	1	RL	1st	1	1	1	0
41842	Morning	open - pheromone allowed	open	allowed	C11	yellow1141842	yellow	R	2	RR	1st	1	1	2	0
41842	Morning	open - pheromone allowed	open	allowed	C11	yellow1141842	yellow	R	3	RR	1st	1	1	4	2
41842	Morning	open - pheromone allowed	open	allowed	C11	yellow1141842	yellow	R	4	RL	1st	1	1	0
41842	Morning	open - pheromone allowed	open	allowed	C11	yellow1141842	yellow	R	5	RL	1st	1	1	0
41842	Morning	open - pheromone allowed	open	allowed	C11	yellow1141842	yellow	R	6	RL	1st	1	1	0	1
41842	Morning	open - pheromone allowed	open	allowed	C11	yellow1141842	yellow	R	7	LR	1st	0	0	2
41842	Morning	open - pheromone allowed	open	allowed	C11	green1141842	green	R	0		1st				1
41842	Morning	open - pheromone allowed	open	allowed	C11	green1141842	green	R	1	R*L	1st	1	1	0	3	1
41842	Morning	open - pheromone allowed	open	allowed	C11	green1141842	green	R	2	LL	1st	0	0	0	1
41842	Morning	open - pheromone allowed	open	allowed	C11	green1141842	green	R	3	LL	1st	0	0	0
41842	Morning	open - pheromone allowed	open	allowed	C11	green1141842	green	R	4	RL	1st	1	1	0	0
41842	Morning	open - pheromone allowed	open	allowed	C11	green1141842	green	R	5	R*L	1st	1	1	0	0	1
41842	Morning	open - pheromone allowed	open	allowed	C11	green1141842	green	R	6	L*L	1st	0	0	0	1	1
41842	Morning	open - pheromone allowed	open	allowed	C11	green1141842	green	R	7	LL	1st	0	0	0
41842	Morning	open - pheromone allowed	open	allowed	C11	red1141842	red	R	0		1st				0
41842	Morning	open - pheromone allowed	open	allowed	C11	red1141842	red	R	1	RL	1st	1	1	0	1
41842	Morning	open - pheromone allowed	open	allowed	C11	red1141842	red	R	2	LL	1st	0	0	2
41842	Morning	open - pheromone allowed	open	allowed	C11	red1141842	red	R	3	L*R	1st	0	0	0		1
41842	Morning	open - pheromone allowed	open	allowed	C11	red1141842	red	R	4	LL	1st	0	0	2	1
41842	Morning	open - pheromone allowed	open	allowed	C11	red1141842	red	R	5	RL	1st	1	1	0	0
41842	Morning	open - pheromone allowed	open	allowed	C11	red1141842	red	R	6	RL	1st	1	1	0	1
41842	Morning	open - pheromone allowed	open	allowed	C11	red1141842	red	R	7	L*R	1st	0	0		0	1
41842	Morning	open - pheromone allowed	open	allowed	C11	orange1141842	orange	R	0		1st
41842	Morning	open - pheromone allowed	open	allowed	C11	orange1141842	orange	R	1	LR	1st	0	0	0
41842	Morning	open - pheromone allowed	open	allowed	C11	orange1141842	orange	R	2	RR	1st	1	1	0	2
41842	Morning	open - pheromone allowed	open	allowed	C11	orange1141842	orange	R	3	RL	1st	1	1		2
41842	Morning	open - pheromone allowed	open	allowed	C11	orange1141842	orange	R	4	RL	1st	1	1	0	1
41842	Morning	open - pheromone allowed	open	allowed	C11	orange1141842	orange	R	5	RL	1st	1	1	0	2
41842	Morning	open - pheromone allowed	open	allowed	C11	orange1141842	orange	R	6	RL	1st	1	1	0	0
41842	Morning	open - pheromone allowed	open	allowed	C11	orange1141842	orange	R	7	R*L	1st	1	1	0		1
41842	Morning	open - pheromone allowed	open	allowed	C11	gold1141842	gold	L	0		1st				1
41842	Morning	open - pheromone allowed	open	allowed	C11	gold1141842	gold	L	1	LL	1st	1	1	1	1
41842	Morning	open - pheromone allowed	open	allowed	C11	gold1141842	gold	L	2	LR	1st	1	1	2	0
41842	Morning	open - pheromone allowed	open	allowed	C11	gold1141842	gold	L	3	LR	1st	1	1	1	0
41842	Morning	open - pheromone allowed	open	allowed	C11	gold1141842	gold	L	4	R*R	1st	0	0		1	1
41842	Morning	open - pheromone allowed	open	allowed	C11	gold1141842	gold	L	5	RR	1st	0	0	0	1
41842	Morning	open - pheromone allowed	open	allowed	C11	gold1141842	gold	L	6	LL	1st	1	1	0	0
41842	Morning	open - pheromone allowed	open	allowed	C11	gold1141842	gold	L	7	RR	1st	0	0	0
41842	Morning	open - pheromone allowed	open	allowed	C11	yellow1141842	yellow	L	0		1st				0
41842	Morning	open - pheromone allowed	open	allowed	C11	yellow1141842	yellow	L	1	LL	1st	1	1	1	1
41842	Morning	open - pheromone allowed	open	allowed	C11	yellow1141842	yellow	L	2	LL	1st	1	1	1	3
41842	Morning	open - pheromone allowed	open	allowed	C11	yellow1141842	yellow	L	3	R*L	1st	0	0	0	0	1
41842	Morning	open - pheromone allowed	open	allowed	C11	yellow1141842	yellow	L	4	RL	1st	0	0	0	0
41842	Morning	open - pheromone allowed	open	allowed	C11	yellow1141842	yellow	L	5	RL	1st	0	0	0	1
41842	Morning	open - pheromone allowed	open	allowed	C11	yellow1141842	yellow	L	6	LR	1st	1	1	0
41842	Morning	open - pheromone allowed	open	allowed	C11	yellow1141842	yellow	L	7	LL	1st	1	1	0
41842	Morning	open - pheromone allowed	open	allowed	C11	green1141842	green	L	0		1st				0
41842	Morning	open - pheromone allowed	open	allowed	C11	green1141842	green	L	1	LR	1st	1	1		0
41842	Morning	open - pheromone allowed	open	allowed	C11	green1141842	green	L	2	LR	1st	1	1	0	0
41842	Morning	open - pheromone allowed	open	allowed	C11	green1141842	green	L	3	LR	1st	1	1	0	0
41842	Morning	open - pheromone allowed	open	allowed	C11	green1141842	green	L	4	LR	1st	1	1	0	0
41842	Morning	open - pheromone allowed	open	allowed	C11	green1141842	green	L	5	LR	1st	1	1	1	2
41842	Morning	open - pheromone allowed	open	allowed	C11	green1141842	green	L	6	LR	1st	1	1	1	2
41842	Morning	open - pheromone allowed	open	allowed	C11	green1141842	green	L	7	RR	1st	0	0	0
41842	Morning	open - pheromone allowed	open	allowed	C11	red1141842	red	L	0		1st
41842	Morning	open - pheromone allowed	open	allowed	C11	red1141842	red	L	1	LR	1st	1	1	0	5
41842	Morning	open - pheromone allowed	open	allowed	C11	red1141842	red	L	2	LL	1st	1	1	3	1
41842	Morning	open - pheromone allowed	open	allowed	C11	red1141842	red	L	3	LR	1st	1	1	1	1
41842	Morning	open - pheromone allowed	open	allowed	C11	red1141842	red	L	4	LL	1st	1	1	0	1
41842	Morning	open - pheromone allowed	open	allowed	C11	red1141842	red	L	5	LL	1st	1	1	0	0
41842	Morning	open - pheromone allowed	open	allowed	C11	red1141842	red	L	6	LR	1st	1	1	0	0
41842	Morning	open - pheromone allowed	open	allowed	C11	red1141842	red	L	7	LL	1st	1	1	0
41842	Morning	open - pheromone allowed	open	allowed	C11	orange1141842	orange	L	0		1st				0
41842	Morning	open - pheromone allowed	open	allowed	C11	orange1141842	orange	L	1	RR	1st	0	0	0
41842	Morning	open - pheromone allowed	open	allowed	C11	orange1141842	orange	L	2	LL	1st	1	1	0	2
41842	Morning	open - pheromone allowed	open	allowed	C11	orange1141842	orange	L	3	LR	1st	1	1	0	0
41842	Morning	open - pheromone allowed	open	allowed	C11	orange1141842	orange	L	4	LL	1st	1	1	0	1
41842	Morning	open - pheromone allowed	open	allowed	C11	orange1141842	orange	L	5	LR	1st	1	1	0	1
41842	Morning	open - pheromone allowed	open	allowed	C11	orange1141842	orange	L	6	LL	1st	1	1	0	0
41842	Morning	open - pheromone allowed	open	allowed	C11	orange1141842	orange	L	7	RR	1st	0	0	0
41843	Morning	open - pheromone allowed	open	allowed	C5	gold541843	gold	R	0		1st				0
41843	Morning	open - pheromone allowed	open	allowed	C5	gold541843	gold	R	1	L*R	1st	0	0	0	2	1
41843	Morning	open - pheromone allowed	open	allowed	C5	gold541843	gold	R	2	RL	1st	1	1	3	0
41843	Morning	open - pheromone allowed	open	allowed	C5	gold541843	gold	R	3	RL	1st	1	1	3	0
41843	Morning	open - pheromone allowed	open	allowed	C5	gold541843	gold	R	4	RL	1st	1	1	0	0
41843	Morning	open - pheromone allowed	open	allowed	C5	gold541843	gold	R	5	RL	1st	1	1	0	0
41843	Morning	open - pheromone allowed	open	allowed	C5	gold541843	gold	R	6	RL	1st	1	1		0
41843	Morning	open - pheromone allowed	open	allowed	C5	gold541843	gold	R	7	LL	1st	0	0	0
41843	Morning	open - pheromone allowed	open	allowed	C5	yellow541843	yellow	R	0		1st				0
41843	Morning	open - pheromone allowed	open	allowed	C5	yellow541843	yellow	R	1	L*L	1st	0	0	0	6	1
41843	Morning	open - pheromone allowed	open	allowed	C5	yellow541843	yellow	R	2	L*L	1st	0	0	0	0	1
41843	Morning	open - pheromone allowed	open	allowed	C5	yellow541843	yellow	R	3	RL	1st	1	1	0	1
41843	Morning	open - pheromone allowed	open	allowed	C5	yellow541843	yellow	R	4	RL	1st	1	1		0
41843	Morning	open - pheromone allowed	open	allowed	C5	yellow541843	yellow	R	5	RL	1st	1	1	0	0
41843	Morning	open - pheromone allowed	open	allowed	C5	yellow541843	yellow	R	6	RL	1st	1	1	0
41843	Morning	open - pheromone allowed	open	allowed	C5	yellow541843	yellow	R	7	LL	1st	0	0	0
41843	Morning	open - pheromone allowed	open	allowed	C5	green541843	green	R	0		1st
41843	Morning	open - pheromone allowed	open	allowed	C5	green541843	green	R	1	L*R	1st	0	0		3	1
41843	Morning	open - pheromone allowed	open	allowed	C5	green541843	green	R	2	L*L	1st	0	0		2	1
41843	Morning	open - pheromone allowed	open	allowed	C5	green541843	green	R	3	RL	1st	1	1	0	2
41843	Morning	open - pheromone allowed	open	allowed	C5	green541843	green	R	4	RL	1st	1	1	0	1
41843	Morning	open - pheromone allowed	open	allowed	C5	green541843	green	R	5	RL	1st	1	1	0
41843	Morning	open - pheromone allowed	open	allowed	C5	green541843	green	R	6	RL	1st	1	1	0	0
41843	Morning	open - pheromone allowed	open	allowed	C5	green541843	green	R	7	LL	1st	0	0	0
41843	Morning	open - pheromone allowed	open	allowed	C5	red541843	red	R	0		1st
[truncated: 3,280 more rows]

## Sheet: stacked bif & direction
Date	Time	Treatment	mazetreatment	pherotreatment	col	Ant	Colour	FeederPos	Trip	Decision	bifurcation	correct	correct	direction	lays	Star	laid
[truncated: 9,860 more rows]

[truncated: 4 more sheets: cleaned for R, cumulativeCorrect, DecisionLastTrip, Sheet4]
